# Supplementary material for: Genetic regulation of nascent RNA maturation revealed by direct RNA nanopore sequencing
Source: HighWire-hosted journal article supplement (doi:10.1101/gr.279203.124), 2025-02-14
Supplement: Supplemental_Tables.xlsx [file Supplemental_Tables.xlsx]

## Sheet: Table S1
Supplemental Table 1. Direct RNA nanopore sequencing statistics. The number of reads, percent uniquely mapped reads and median read length is indicated for each direct RNA sequencing run. Different replicate numbers indicate biological replicates (different cell fractionation and sequencing library), while letters indicate technical replicates (different sequencing library from the same RNA sampl…
cell_line	rep	compartment	device	kit version	total reads	uniquely mapped reads	fraction uniquely mapped	median_read_length	yeast spike-in added
GM18501	rep1a	chromatin	P2 Solo	SQK-RNA002	2903488	2599283	0.895227739877003	1202
GM18501	rep1b	chromatin	P2 Solo	SQK-RNA004	5000451	4542750	0.908468056181332	1350
GM18510	rep1a	chromatin	P2 Solo	SQK-RNA002	3197621	2743407	0.85795252157776	1109
GM18510	rep1b	chromatin	P2 Solo	SQK-RNA004	3414046	3034169	0.888731141876823	1510
GM18522	rep1a	chromatin	P2 Solo	SQK-RNA002	4042350	3468019	0.857921506054646	1126
GM18522	rep1b	chromatin	P2 Solo	SQK-RNA004	448197	390852	0.872054029812783	1341
GM18853	rep1a	chromatin	P2 Solo	SQK-RNA002	3236741	2884923	0.891304864986108	1070
GM18853	rep1b	chromatin	P2 Solo	SQK-RNA004	6421128	5816151	0.90578337637873	1301
GM18861	rep1a	chromatin	P2 Solo	SQK-RNA002	2618772	2336567	0.892237659483147	1076
GM18861	rep1b	chromatin	P2 Solo	SQK-RNA004	2902699	2667960	0.919130781386565	1378
GM18870	rep1	chromatin	MinION	SQK-RNA002	463489	333542	0.719633044149915	1322	yes
GM18870	rep2a	chromatin	MinION	SQK-RNA002	1497274	1318180	0.880386622622179	1082
GM18870	rep2b	chromatin	MinION	SQK-RNA002	1224229	1097968	0.896864883939198	1137
GM19099	rep1	chromatin	MinION	SQK-RNA002	578563	451999	0.781244220594819	1166	yes
GM19099	rep2a	chromatin	MinION	SQK-RNA002	672756	618802	0.91980153279941	1370
GM19099	repb	chromatin	MinION	SQK-RNA002	487807	445891	0.914072573784304	1310
GM19102	rep1a	chromatin	MinION	SQK-RNA002	472792	418593	0.885363965549332	1215	yes
GM19102	rep1b	chromatin	MinION	SQK-RNA002	332141	188176	0.566554565681442	1256
GM19102	rep2a	chromatin	MinION	SQK-RNA002	856677	782607	0.913538007907298	1466
GM19102	rep2b	chromatin	MinION	SQK-RNA002	526840	474742	0.901112292157012	1372
GM19102	rep3a	chromatin	MinION	SQK-RNA002	623428	562919	0.902941478406488	1410
GM19102	rep3b	chromatin	MinION	SQK-RNA002	483924	437634	0.904344483844571	1419
GM19144	rep1a	chromatin	P2 Solo	SQK-RNA002	4131867	3658648	0.885470902136976	1113
GM19144	rep1b	chromatin	P2 Solo	SQK-RNA004	3265750	2900612	0.888191686442624	1351
GM19152	rep1a	chromatin	P2 Solo	SQK-RNA002	4300985	3885435	0.90338259724226	1223
GM19152	rep1b	chromatin	P2 Solo	SQK-RNA004	7373603	6708938	0.909858857332026	1453
GM19209	rep1a	chromatin	P2 Solo	SQK-RNA002	4307403	3768355	0.874855452345648	918
GM19209	rep1b	chromatin	P2 Solo	SQK-RNA004	5402228	4957343	0.917647866769044	1467
GM19223	rep1a	chromatin	MinION	SQK-RNA002	821604	736809	0.896793345699388	1328
GM19223	rep1b	chromatin	MinION	SQK-RNA002	774393	700267	0.904278576898293	1381
GM19223	rep1c	chromatin	MinION	SQK-RNA002	716998	654430	0.912736158259856	1318
GM18501	rep1	cytoplasm	MinION	SQK-RNA002	1343043	1137951	0.847293050185288	866
GM18510	rep1	cytoplasm	MinION	SQK-RNA002	1485812	1213092	0.816450533445685	808
GM18522	rep1	cytoplasm	MinION	SQK-RNA002	1637366	1346283	0.822224841605359	834
GM18853	rep1	cytoplasm	MinION	SQK-RNA002	1752676	1462968	0.834705330591621	865
GM18861	rep1	cytoplasm	MinION	SQK-RNA002	2098345	1775073	0.845939538064522	871
GM18870	rep1	cytoplasm	MinION	SQK-RNA002	2012963	1605420	0.797540739695663	789	yes
GM19099	rep1	cytoplasm	MinION	SQK-RNA002	2214905	1813017	0.818552940193823	771	yes
GM19102	rep1	cytoplasm	MinION	SQK-RNA002	1249117	934361	0.74801719934962	744	yes
GM19144	rep1	cytoplasm	MinION	SQK-RNA002	1644936	1380160	0.839035682847235	863
GM19152	rep1	cytoplasm	MinION	SQK-RNA002	1868783	1554928	0.832053801859285	888
GM19209	rep1	cytoplasm	MinION	SQK-RNA002	1780346	1478701	0.830569451106695	899
GM19223	rep1	cytoplasm	MinION	SQK-RNA002	1475613	1247983	0.845738686227351	844

## Sheet: Table S2
Supplemental Table 2. Allelic splicing order for groups of 3 introns in lymphoblastoid cell lines. For each allele and order, the splicing order score and rank is indicated. Analyzed introns refer to the intron group, with each intron numbered by its position in the transcript. FDR refers to the adjusted p-value from the chi-square contingency tests performed for each splicing level. AS_event ind…
cell_line	allele	gene	gene_name	n_analyzed_introns	splicing_order	splicing_order_score	rank	Euclidean_distance	FDR_level1	FDR_level2	AS_event
GM19152	1	NM_001173466.1	AAAS	10_9_8	8->10->9	0.885714285714286	1	0.0740778532671621	1	1	NA
GM19152	2	NM_001173466.1	AAAS	10_9_8	8->10->9	0.833333333333333	1	0.0740778532671621	1	1	NA
GM19152	1	NM_001173466.1	AAAS	10_9_8	8->9->10	0.114285714285714	2	0.0740778532671621	1	1	NA
GM19152	2	NM_001173466.1	AAAS	10_9_8	8->9->10	0.166666666666667	2	0.0740778532671621	1	1	NA
GM19152	1	NM_001173466.1	AAAS	11_10_9	11->10->9	0.81283422459893	1	0.0373295914442494	1	1	NA
GM19152	2	NM_001173466.1	AAAS	11_10_9	11->10->9	0.826771653543307	1	0.0373295914442494	1	1	NA
GM19152	1	NM_001173466.1	AAAS	11_10_9	11->9->10	0.101604278074866	2	0.0373295914442494	1	1	NA
GM19152	2	NM_001173466.1	AAAS	11_10_9	11->9->10	0.118110236220472	2	0.0373295914442494	1	1	NA
GM19152	1	NM_001173466.1	AAAS	11_10_9	10->11->9	0.0855614973262032	3	0.0373295914442494	1	1	NA
GM19152	2	NM_001173466.1	AAAS	11_10_9	10->11->9	0.0551181102362204	3	0.0373295914442494	1	1	NA
GM19152	1	NM_001173466.1	AAAS	13_12_11	11->12->13	0.971830985915493	1	0.0196339508659444	1	1	NA
GM19152	2	NM_001173466.1	AAAS	13_12_11	11->12->13	0.985714285714286	1	0.0196339508659444	1	1	NA
GM19152	1	NM_001173466.1	AAAS	13_12_11	11->13->12	0.028169014084507	2	0.0196339508659444	1	1	NA
GM19152	2	NM_001173466.1	AAAS	13_12_11	11->13->12	0.0142857142857142	2	0.0196339508659444	1	1	NA
GM19209	1	NM_001173466.1	AAAS	14_13_12	12->14->13	0.865979381443299	1	0.113344468343155	1	1	NA
GM19209	2	NM_001173466.1	AAAS	14_13_12	12->14->13	0.956521739130435	1	0.113344468343155	1	1	NA
GM19209	1	NM_001173466.1	AAAS	14_13_12	14->12->13	0.0721649484536082	2	0.113344468343155	1	1	NA
GM19209	2	NM_001173466.1	AAAS	14_13_12	14->12->13	0.0434782608695652	2	0.113344468343155	1	1	NA
GM19209	1	NM_001173466.1	AAAS	14_13_12	12->13->14	0.0618556701030927	3	0.113344468343155	1	1	NA
GM19152	1	NM_001173466.1	AAAS	14_13_12	12->14->13	0.868613138686131	1	0.11521768387125	1	1	NA
GM19152	2	NM_001173466.1	AAAS	14_13_12	12->14->13	0.953488372093023	1	0.11521768387125	1	1	NA
GM19152	1	NM_001173466.1	AAAS	14_13_12	14->12->13	0.124087591240876	2	0.11521768387125	1	1	NA
GM19152	2	NM_001173466.1	AAAS	14_13_12	14->12->13	0.0465116279069767	2	0.11521768387125	1	1	NA
GM19152	1	NM_001173466.1	AAAS	14_13_12	14->13->12	0.0072992700729927	3	0.11521768387125	1	1	NA
GM19152	1	NM_015665.5	AAAS	5_4_3	3->5->4	0.546206896551724	1	0.140647896773445	1	1	NA
GM19152	2	NM_015665.5	AAAS	5_4_3	5->3->4	0.475409836065574	1	0.140647896773445	1	1	NA
GM19152	1	NM_015665.5	AAAS	5_4_3	5->3->4	0.397241379310345	2	0.140647896773445	1	1	NA
GM19152	2	NM_015665.5	AAAS	5_4_3	3->5->4	0.432190760059612	2	0.140647896773445	1	1	NA
GM19152	1	NM_015665.5	AAAS	5_4_3	3->4->5	0.0455172413793103	3	0.140647896773445	1	1	NA
GM19152	2	NM_015665.5	AAAS	5_4_3	3->4->5	0.059612518628912	3	0.140647896773445	1	1	NA
GM19152	1	NM_015665.5	AAAS	5_4_3	5->4->3	0.0110344827586206	4	0.140647896773445	1	1	NA
GM19152	2	NM_015665.5	AAAS	5_4_3	5->4->3	0.0327868852459016	4	0.140647896773445	1	1	NA
GM18853	1	NM_001605.2	AARS	17_16_15	16->17->15	0.769911504424779	1	0.187521401351697	1	0.724573844254734	NA
GM18853	2	NM_001605.2	AARS	17_16_15	16->17->15	0.62015503875969	1	0.187521401351697	1	0.724573844254734	NA
GM18853	1	NM_001605.2	AARS	17_16_15	17->16->15	0.209975864843121	2	0.187521401351697	1	0.724573844254734	NA
GM18853	2	NM_001605.2	AARS	17_16_15	17->16->15	0.310077519379845	2	0.187521401351697	1	0.724573844254734	NA
GM18853	1	NM_001605.2	AARS	17_16_15	16->15->17	0.0176991150442477	3	0.187521401351697	1	0.724573844254734	NA
GM18853	2	NM_001605.2	AARS	17_16_15	16->15->17	0.0697674418604651	3	0.187521401351697	1	0.724573844254734	NA
GM18853	1	NM_001605.2	AARS	17_16_15	17->15->16	0.0024135156878519	4	0.187521401351697	1	0.724573844254734	NA
GM19152	1	NM_001605.2	AARS	17_16_15	17->16->15	0.579172610556348	1	0.535829802583006	1	1	NA
GM19152	2	NM_001605.2	AARS	17_16_15	16->17->15	0.789644012944984	1	0.535829802583006	1	1	NA
GM19152	1	NM_001605.2	AARS	17_16_15	16->17->15	0.413694721825963	2	0.535829802583006	1	1	NA
GM19152	2	NM_001605.2	AARS	17_16_15	17->16->15	0.197411003236246	2	0.535829802583006	1	1	NA
GM19152	1	NM_001605.2	AARS	17_16_15	16->15->17	0.007132667617689	3	0.535829802583006	1	1	NA
GM19152	2	NM_001605.2	AARS	17_16_15	16->15->17	0.0129449838187702	3	0.535829802583006	1	1	NA
GM18853	1	NM_001605.2	AARS	18_17_16	18->16->17	0.544964997307485	1	0.00904430623905089	1	1	NA
GM18853	2	NM_001605.2	AARS	18_17_16	18->16->17	0.545391304347826	1	0.00904430623905089	1	1	NA
GM18853	1	NM_001605.2	AARS	18_17_16	18->17->16	0.379106085083468	2	0.00904430623905089	1	1	NA
GM18853	2	NM_001605.2	AARS	18_17_16	18->17->16	0.37495652173913	2	0.00904430623905089	1	1	NA
GM18853	1	NM_001605.2	AARS	18_17_16	16->18->17	0.0371567043618739	3	0.00904430623905089	1	1	NA
GM18853	2	NM_001605.2	AARS	18_17_16	16->18->17	0.0445217391304347	3	0.00904430623905089	1	1	NA
GM18853	1	NM_001605.2	AARS	18_17_16	17->18->16	0.0258481421647819	4	0.00904430623905089	1	1	NA
GM18853	2	NM_001605.2	AARS	18_17_16	17->18->16	0.0229565217391304	4	0.00904430623905089	1	1	NA
GM18853	1	NM_001605.2	AARS	18_17_16	16->17->18	0.0064620355411954	5	0.00904430623905089	1	1	NA
GM18853	2	NM_001605.2	AARS	18_17_16	16->17->18	0.0069565217391304	5	0.00904430623905089	1	1	NA
GM18853	1	NM_001605.2	AARS	18_17_16	17->16->18	0.0064620355411954	6	0.00904430623905089	1	1	NA
GM18853	2	NM_001605.2	AARS	18_17_16	17->16->18	0.0052173913043478	6	0.00904430623905089	1	1	NA
GM19152	1	NM_001605.2	AARS	18_17_16	18->17->16	0.494845360824742	1	0.182306637204342	1	1	NA
GM19152	2	NM_001605.2	AARS	18_17_16	18->16->17	0.560185185185185	1	0.182306637204342	1	1	NA
GM19152	1	NM_001605.2	AARS	18_17_16	18->16->17	0.445360824742268	2	0.182306637204342	1	1	NA
GM19152	2	NM_001605.2	AARS	18_17_16	18->17->16	0.356481481481481	2	0.182306637204342	1	1	NA
GM19152	1	NM_001605.2	AARS	18_17_16	17->18->16	0.0206185567010309	3	0.182306637204342	1	1	NA
GM19152	2	NM_001605.2	AARS	18_17_16	17->18->16	0.0486111111111111	3	0.182306637204342	1	1	NA
GM19152	1	NM_001605.2	AARS	18_17_16	16->18->17	0.0185567010309278	4	0.182306637204342	1	1	NA
GM19152	2	NM_001605.2	AARS	18_17_16	16->18->17	0.0254629629629629	4	0.182306637204342	1	1	NA
GM19152	1	NM_001605.2	AARS	18_17_16	17->16->18	0.0103092783505154	5	0.182306637204342	1	1	NA
GM19152	2	NM_001605.2	AARS	18_17_16	17->16->18	0.0069444444444444	5	0.182306637204342	1	1	NA
GM19152	1	NM_001605.2	AARS	18_17_16	16->17->18	0.0103092783505154	6	0.182306637204342	1	1	NA
GM19152	2	NM_001605.2	AARS	18_17_16	16->17->18	0.0023148148148148	6	0.182306637204342	1	1	NA
GM18853	1	NM_001605.2	AARS	19_18_17	18->17->19	0.650887573964497	1	0.0401448361667142	1	1	NA
GM18853	2	NM_001605.2	AARS	19_18_17	18->17->19	0.639684516396845	1	0.0401448361667142	1	1	NA
GM18853	1	NM_001605.2	AARS	19_18_17	18->19->17	0.260355029585799	2	0.0401448361667142	1	1	NA
GM18853	2	NM_001605.2	AARS	19_18_17	18->19->17	0.292029887920299	2	0.0401448361667142	1	1	NA
GM18853	1	NM_001605.2	AARS	19_18_17	17->18->19	0.0887573964497041	3	0.0401448361667142	1	1	NA
GM18853	2	NM_001605.2	AARS	19_18_17	17->18->19	0.0668327106683271	3	0.0401448361667142	1	1	NA
GM18853	2	NM_001605.2	AARS	19_18_17	17->19->18	0.0014528850145288	4	0.0401448361667142	1	1	NA
GM19152	1	NM_001605.2	AARS	19_18_17	18->17->19	0.662440570522979	1	0.0339261812314303	1	1	NA
GM19152	2	NM_001605.2	AARS	19_18_17	18->17->19	0.665809768637532	1	0.0339261812314303	1	1	NA
GM19152	1	NM_001605.2	AARS	19_18_17	18->19->17	0.1743264659271	2	0.0339261812314303	1	1	NA
GM19152	2	NM_001605.2	AARS	19_18_17	18->19->17	0.197943444730077	2	0.0339261812314303	1	1	NA
GM19152	1	NM_001605.2	AARS	19_18_17	17->18->19	0.150554675118859	3	0.0339261812314303	1	1	NA
GM19152	2	NM_001605.2	AARS	19_18_17	17->18->19	0.126820908311911	3	0.0339261812314303	1	1	NA
GM19152	1	NM_001605.2	AARS	19_18_17	19->18->17	0.0079239302694136	4	0.0339261812314303	1	1	NA
GM19152	2	NM_001605.2	AARS	19_18_17	19->18->17	0.0094258783204798	4	0.0339261812314303	1	1	NA
GM19152	1	NM_001605.2	AARS	19_18_17	17->19->18	0.0039619651347068	5	0.0339261812314303	1	1	NA
GM19152	1	NM_001605.2	AARS	19_18_17	19->17->18	0.0007923930269413	6	0.0339261812314303	1	1	NA
GM18853	1	NM_001605.2	AARS	20_19_18	20->18->19	0.708333333333333	1	0.0909185067844038	1	1	NA
GM18853	2	NM_001605.2	AARS	20_19_18	20->18->19	0.64118372379778	1	0.0909185067844038	1	1	NA
GM18853	1	NM_001605.2	AARS	20_19_18	18->20->19	0.291666666666667	2	0.0909185067844038	1	1	NA
GM18853	2	NM_001605.2	AARS	20_19_18	18->20->19	0.352651048088779	2	0.0909185067844038	1	1	NA
GM18853	2	NM_001605.2	AARS	20_19_18	20->19->18	0.0061652281134401	3	0.0909185067844038	1	1	NA
GM19152	1	NM_001605.2	AARS	20_19_18	20->18->19	0.650887573964497	1	0.0246002572186388	1	1	NA
GM19152	2	NM_001605.2	AARS	20_19_18	20->18->19	0.641658440276407	1	0.0246002572186388	1	1	NA
GM19152	1	NM_001605.2	AARS	20_19_18	18->20->19	0.325443786982249	2	0.0246002572186388	1	1	NA
GM19152	2	NM_001605.2	AARS	20_19_18	18->20->19	0.345508390918065	2	0.0246002572186388	1	1	NA
GM19152	1	NM_001605.2	AARS	20_19_18	20->19->18	0.0236686390532544	3	0.0246002572186388	1	1	NA
GM19152	2	NM_001605.2	AARS	20_19_18	20->19->18	0.0128331688055281	3	0.0246002572186388	1	1	NA
GM18501	1	NM_005689.2	ABCB6	4_3_2	4->2->3	0.85	1	0.204751256218556	1	1	NA
GM18501	2	NM_005689.2	ABCB6	4_3_2	4->2->3	0.692307692307692	1	0.204751256218556	1	1	NA
GM18501	1	NM_005689.2	ABCB6	4_3_2	2->4->3	0.15	2	0.204751256218556	1	1	NA
GM18501	2	NM_005689.2	ABCB6	4_3_2	2->4->3	0.276923076923077	2	0.204751256218556	1	1	NA
GM18501	2	NM_005689.2	ABCB6	4_3_2	2->3->4	0.0307692307692307	3	0.204751256218556	1	1	NA
GM18853	1	NM_005050.3	ABCD4	14_13_12	12->14->13	0.596491228070175	1	0.885366444580592	1	0.0110899065762561	NA
GM18853	2	NM_005050.3	ABCD4	14_13_12	12->13->14	0.818181818181818	1	0.885366444580592	1	0.0110899065762561	NA
GM18853	1	NM_005050.3	ABCD4	14_13_12	14->12->13	0.298245614035088	2	0.885366444580592	1	0.0110899065762561	NA
GM18853	2	NM_005050.3	ABCD4	14_13_12	12->14->13	0.136363636363636	2	0.885366444580592	1	0.0110899065762561	NA
GM18853	1	NM_005050.3	ABCD4	14_13_12	12->13->14	0.105263157894737	3	0.885366444580592	1	0.0110899065762561	NA
GM18853	2	NM_005050.3	ABCD4	14_13_12	14->12->13	0.0454545454545454	3	0.885366444580592	1	0.0110899065762561	NA
GM18853	1	NM_005050.3	ABCD4	15_14_13	15->14->13	0.808510638297872	1	0.705390210641871	0.761134818178716	0.184674329253879	NA
GM18853	2	NM_005050.3	ABCD4	15_14_13	13->15->14	0.282828282828283	1	0.705390210641871	0.761134818178716	0.184674329253879	NA
GM18853	1	NM_005050.3	ABCD4	15_14_13	15->13->14	0.0851063829787234	2	0.705390210641871	0.761134818178716	0.184674329253879	NA
GM18853	2	NM_005050.3	ABCD4	15_14_13	15->13->14	0.247474747474747	2	0.705390210641871	0.761134818178716	0.184674329253879	NA
GM18853	1	NM_005050.3	ABCD4	15_14_13	14->15->13	0.0808510638297872	3	0.705390210641871	0.761134818178716	0.184674329253879	NA
GM18853	2	NM_005050.3	ABCD4	15_14_13	15->14->13	0.212121212121212	3	0.705390210641871	0.761134818178716	0.184674329253879	NA
GM18853	1	NM_005050.3	ABCD4	15_14_13	13->15->14	0.0085106382978723	4	0.705390210641871	0.761134818178716	0.184674329253879	NA
GM18853	2	NM_005050.3	ABCD4	15_14_13	13->14->15	0.202020202020202	4	0.705390210641871	0.761134818178716	0.184674329253879	NA
GM18853	1	NM_005050.3	ABCD4	15_14_13	14->13->15	0.0085106382978723	5	0.705390210641871	0.761134818178716	0.184674329253879	NA
GM18853	2	NM_005050.3	ABCD4	15_14_13	14->15->13	0.0303030303030303	5	0.705390210641871	0.761134818178716	0.184674329253879	NA
GM18853	1	NM_005050.3	ABCD4	15_14_13	13->14->15	0.0085106382978723	6	0.705390210641871	0.761134818178716	0.184674329253879	NA
GM18853	2	NM_005050.3	ABCD4	15_14_13	14->13->15	0.0252525252525252	6	0.705390210641871	0.761134818178716	0.184674329253879	NA
GM19209	1	NM_005050.3	ABCD4	15_14_13	15->14->13	0.546468401486989	1	0.560711367582758	0.908789225415971	0.119608565724019	NA
GM19209	2	NM_005050.3	ABCD4	15_14_13	15->13->14	0.31858407079646	1	0.560711367582758	0.908789225415971	0.119608565724019	NA
GM19209	1	NM_005050.3	ABCD4	15_14_13	14->15->13	0.312267657992565	2	0.560711367582758	0.908789225415971	0.119608565724019	NA
GM19209	2	NM_005050.3	ABCD4	15_14_13	13->15->14	0.265486725663717	2	0.560711367582758	0.908789225415971	0.119608565724019	NA
GM19209	1	NM_005050.3	ABCD4	15_14_13	14->13->15	0.0892193308550185	3	0.560711367582758	0.908789225415971	0.119608565724019	NA
GM19209	2	NM_005050.3	ABCD4	15_14_13	15->14->13	0.265486725663717	3	0.560711367582758	0.908789225415971	0.119608565724019	NA
GM19209	1	NM_005050.3	ABCD4	15_14_13	15->13->14	0.0260223048327137	4	0.560711367582758	0.908789225415971	0.119608565724019	NA
GM19209	2	NM_005050.3	ABCD4	15_14_13	13->14->15	0.0884955752212389	4	0.560711367582758	0.908789225415971	0.119608565724019	NA
GM19209	1	NM_005050.3	ABCD4	15_14_13	13->14->15	0.0223048327137546	5	0.560711367582758	0.908789225415971	0.119608565724019	NA
GM19209	2	NM_005050.3	ABCD4	15_14_13	14->15->13	0.0442477876106194	5	0.560711367582758	0.908789225415971	0.119608565724019	NA
GM19209	1	NM_005050.3	ABCD4	15_14_13	13->15->14	0.0037174721189591	6	0.560711367582758	0.908789225415971	0.119608565724019	NA
GM19209	2	NM_005050.3	ABCD4	15_14_13	14->13->15	0.0176991150442477	6	0.560711367582758	0.908789225415971	0.119608565724019	NA
GM18501	1	NM_005050.3	ABCD4	16_15_14	16->15->14	0.847826086956522	1	0.169535097524384	1	1	NA
GM18501	2	NM_005050.3	ABCD4	16_15_14	16->15->14	0.742574257425743	1	0.169535097524384	1	1	NA
GM18501	1	NM_005050.3	ABCD4	16_15_14	16->14->15	0.0706521739130434	2	0.169535097524384	1	1	NA
GM18501	2	NM_005050.3	ABCD4	16_15_14	15->16->14	0.123762376237624	2	0.169535097524384	1	1	NA
GM18501	1	NM_005050.3	ABCD4	16_15_14	14->15->16	0.0543478260869565	3	0.169535097524384	1	1	NA
GM18501	2	NM_005050.3	ABCD4	16_15_14	16->14->15	0.0891089108910891	3	0.169535097524384	1	1	NA
GM18501	1	NM_005050.3	ABCD4	16_15_14	14->16->15	0.0271739130434782	4	0.169535097524384	1	1	NA
GM18501	2	NM_005050.3	ABCD4	16_15_14	14->16->15	0.0297029702970297	4	0.169535097524384	1	1	NA
GM18501	2	NM_005050.3	ABCD4	16_15_14	14->15->16	0.0099009900990099	5	0.169535097524384	1	1	NA
GM18501	2	NM_005050.3	ABCD4	16_15_14	15->14->16	0.0049504950495049	6	0.169535097524384	1	1	NA
GM18853	1	NM_005050.3	ABCD4	16_15_14	16->15->14	0.915384615384616	1	0.182262616465178	1	1	NA
GM18853	2	NM_005050.3	ABCD4	16_15_14	16->15->14	0.755287009063444	1	0.182262616465178	1	1	NA
GM18853	1	NM_005050.3	ABCD4	16_15_14	16->14->15	0.0538461538461538	2	0.182262616465178	1	1	NA
GM18853	2	NM_005050.3	ABCD4	16_15_14	16->14->15	0.120845921450151	2	0.182262616465178	1	1	NA
GM18853	1	NM_005050.3	ABCD4	16_15_14	15->16->14	0.0261538461538461	3	0.182262616465178	1	1	NA
GM18853	2	NM_005050.3	ABCD4	16_15_14	15->16->14	0.0755287009063444	3	0.182262616465178	1	1	NA
GM18853	1	NM_005050.3	ABCD4	16_15_14	14->16->15	0.0015384615384615	4	0.182262616465178	1	1	NA
GM18853	2	NM_005050.3	ABCD4	16_15_14	14->15->16	0.0181268882175226	4	0.182262616465178	1	1	NA
GM18853	1	NM_005050.3	ABCD4	16_15_14	14->15->16	0.0015384615384615	5	0.182262616465178	1	1	NA
GM18853	2	NM_005050.3	ABCD4	16_15_14	14->16->15	0.0181268882175226	5	0.182262616465178	1	1	NA
GM18853	1	NM_005050.3	ABCD4	16_15_14	15->14->16	0.0015384615384615	6	0.182262616465178	1	1	NA
GM18853	2	NM_005050.3	ABCD4	16_15_14	15->14->16	0.0120845921450151	6	0.182262616465178	1	1	NA
GM18861	1	NM_005050.3	ABCD4	16_15_14	16->15->14	0.836363636363636	1	0.10047687615089	1	1	NA
GM18861	2	NM_005050.3	ABCD4	16_15_14	16->15->14	0.747663551401869	1	0.10047687615089	1	1	NA
GM18861	1	NM_005050.3	ABCD4	16_15_14	16->14->15	0.0727272727272727	2	0.10047687615089	1	1	NA
GM18861	2	NM_005050.3	ABCD4	16_15_14	15->16->14	0.0934579439252336	2	0.10047687615089	1	1	NA
GM18861	1	NM_005050.3	ABCD4	16_15_14	15->16->14	0.0696969696969696	3	0.10047687615089	1	1	NA
GM18861	2	NM_005050.3	ABCD4	16_15_14	16->14->15	0.0747663551401869	3	0.10047687615089	1	1	NA
GM18861	1	NM_005050.3	ABCD4	16_15_14	14->16->15	0.0121212121212121	4	0.10047687615089	1	1	NA
GM18861	2	NM_005050.3	ABCD4	16_15_14	14->16->15	0.0373831775700934	4	0.10047687615089	1	1	NA
GM18861	1	NM_005050.3	ABCD4	16_15_14	14->15->16	0.006060606060606	5	0.10047687615089	1	1	NA
GM18861	2	NM_005050.3	ABCD4	16_15_14	14->15->16	0.0373831775700934	5	0.10047687615089	1	1	NA
GM18861	1	NM_005050.3	ABCD4	16_15_14	15->14->16	0.003030303030303	6	0.10047687615089	1	1	NA
GM18861	2	NM_005050.3	ABCD4	16_15_14	15->14->16	0.0093457943925233	6	0.10047687615089	1	1	NA
GM19209	1	NM_005050.3	ABCD4	16_15_14	16->15->14	0.592741935483871	1	0.303613815262225	1	0.6305185638289	NA
GM19209	2	NM_005050.3	ABCD4	16_15_14	16->15->14	0.825921219822109	1	0.303613815262225	1	0.6305185638289	NA
GM19209	1	NM_005050.3	ABCD4	16_15_14	16->14->15	0.254032258064516	2	0.303613815262225	1	0.6305185638289	NA
GM19209	2	NM_005050.3	ABCD4	16_15_14	15->16->14	0.0991105463786531	2	0.303613815262225	1	0.6305185638289	NA
GM19209	1	NM_005050.3	ABCD4	16_15_14	15->16->14	0.0846774193548387	3	0.303613815262225	1	0.6305185638289	NA
GM19209	2	NM_005050.3	ABCD4	16_15_14	16->14->15	0.0635324015247776	3	0.303613815262225	1	0.6305185638289	NA
GM19209	1	NM_005050.3	ABCD4	16_15_14	14->16->15	0.0362903225806451	4	0.303613815262225	1	0.6305185638289	NA
GM19209	2	NM_005050.3	ABCD4	16_15_14	14->16->15	0.0050825921219822	4	0.303613815262225	1	0.6305185638289	NA
GM19209	1	NM_005050.3	ABCD4	16_15_14	14->15->16	0.0161290322580645	5	0.303613815262225	1	0.6305185638289	NA
GM19209	2	NM_005050.3	ABCD4	16_15_14	15->14->16	0.0038119440914866	5	0.303613815262225	1	0.6305185638289	NA
GM19209	1	NM_005050.3	ABCD4	16_15_14	15->14->16	0.0161290322580645	6	0.303613815262225	1	0.6305185638289	NA
GM19209	2	NM_005050.3	ABCD4	16_15_14	14->15->16	0.0025412960609911	6	0.303613815262225	1	0.6305185638289	NA
GM18501	1	NM_005050.3	ABCD4	17_16_15	17->16->15	0.904761904761905	1	0.0350186215444767	1	1	NA
GM18501	2	NM_005050.3	ABCD4	17_16_15	17->16->15	0.88	1	0.0350186215444767	1	1	NA
GM18501	1	NM_005050.3	ABCD4	17_16_15	17->15->16	0.0952380952380952	2	0.0350186215444767	1	1	NA
GM18501	2	NM_005050.3	ABCD4	17_16_15	17->15->16	0.12	2	0.0350186215444767	1	1	NA
GM18501	1	NM_005050.3	ABCD4	18_17_16	17->16->18	0.778405879027699	1	0.0226969161807559	1	1	NA
GM18501	2	NM_005050.3	ABCD4	18_17_16	17->16->18	0.796875	1	0.0226969161807559	1	1	NA
GM18501	1	NM_005050.3	ABCD4	18_17_16	17->18->16	0.21368004522329	2	0.0226969161807559	1	1	NA
GM18501	2	NM_005050.3	ABCD4	18_17_16	17->18->16	0.203125	2	0.0226969161807559	1	1	NA
GM18501	1	NM_005050.3	ABCD4	18_17_16	18->17->16	0.0079140757490107	3	0.0226969161807559	1	1	NA
GM18853	1	NM_005050.3	ABCD4	18_17_16	17->16->18	0.895325872284398	1	0.149602632307405	1	0.724470378096458	NA
GM18853	2	NM_005050.3	ABCD4	18_17_16	17->16->18	0.805194805194805	1	0.149602632307405	1	0.724470378096458	NA
GM18853	1	NM_005050.3	ABCD4	18_17_16	17->18->16	0.0783410138248848	2	0.149602632307405	1	0.724470378096458	NA
GM18853	2	NM_005050.3	ABCD4	18_17_16	17->18->16	0.194805194805195	2	0.149602632307405	1	0.724470378096458	NA
GM18853	1	NM_005050.3	ABCD4	18_17_16	16->17->18	0.0263331138907175	3	0.149602632307405	1	0.724470378096458	NA
GM19209	1	NM_005050.3	ABCD4	9_8_7	9->7->8	0.837209302325581	1	0.158404466397872	1	1	NA
GM19209	2	NM_005050.3	ABCD4	9_8_7	9->7->8	0.777777777777778	1	0.158404466397872	1	1	NA
GM19209	1	NM_005050.3	ABCD4	9_8_7	9->8->7	0.0930232558139534	2	0.158404466397872	1	1	NA
GM19209	2	NM_005050.3	ABCD4	9_8_7	9->8->7	0.222222222222222	2	0.158404466397872	1	1	NA
GM19209	1	NM_005050.3	ABCD4	9_8_7	7->9->8	0.0697674418604651	3	0.158404466397872	1	1	NA
GM19209	1	NM_001040876.1	ABCE1	11_12_13	13->12->11	1	1	0.178972728647141	1	1	NA
GM19209	2	NM_001040876.1	ABCE1	11_12_13	13->12->11	0.860557768924303	1	0.178972728647141	1	1	NA
GM19209	2	NM_001040876.1	ABCE1	11_12_13	13->11->12	0.107569721115538	2	0.178972728647141	1	1	NA
GM19209	2	NM_001040876.1	ABCE1	11_12_13	12->13->11	0.0318725099601593	3	0.178972728647141	1	1	NA
GM19152	1	NM_001040876.1	ABCE1	11_12_13	13->12->11	0.772727272727273	1	0.109000650064329	1	1	NA
GM19152	2	NM_001040876.1	ABCE1	11_12_13	13->12->11	0.695652173913043	1	0.109000650064329	1	1	NA
GM19152	1	NM_001040876.1	ABCE1	11_12_13	13->11->12	0.227272727272727	2	0.109000650064329	1	1	NA
GM19152	2	NM_001040876.1	ABCE1	11_12_13	13->11->12	0.304347826086956	2	0.109000650064329	1	1	NA
GM19152	1	NM_018358.2	ABCF3	12_13_14	13->12->14	0.853658536585366	1	0.113398567619195	1	1	NA
GM19152	2	NM_018358.2	ABCF3	12_13_14	13->12->14	0.791741472172352	1	0.113398567619195	1	1	NA
GM19152	1	NM_018358.2	ABCF3	12_13_14	12->13->14	0.0853658536585365	2	0.113398567619195	1	1	NA
GM19152	2	NM_018358.2	ABCF3	12_13_14	12->13->14	0.175942549371634	2	0.113398567619195	1	1	NA
GM19152	1	NM_018358.2	ABCF3	12_13_14	13->14->12	0.0609756097560975	3	0.113398567619195	1	1	NA
GM19152	2	NM_018358.2	ABCF3	12_13_14	13->14->12	0.0323159784560143	3	0.113398567619195	1	1	NA
GM19152	1	NM_018358.2	ABCF3	2_3_4	2->3->4	0.829044117647059	1	0.117092292898626	1	1	NA
GM19152	2	NM_018358.2	ABCF3	2_3_4	2->3->4	0.874820143884892	1	0.117092292898626	1	1	NA
GM19152	1	NM_018358.2	ABCF3	2_3_4	2->4->3	0.150735294117647	2	0.117092292898626	1	1	NA
GM19152	2	NM_018358.2	ABCF3	2_3_4	3->2->4	0.0690647482014388	2	0.117092292898626	1	1	NA
GM19152	1	NM_018358.2	ABCF3	2_3_4	3->2->4	0.0202205882352941	3	0.117092292898626	1	1	NA
GM19152	2	NM_018358.2	ABCF3	2_3_4	2->4->3	0.0546762589928057	3	0.117092292898626	1	1	NA
GM19152	2	NM_018358.2	ABCF3	2_3_4	4->2->3	0.0014388489208633	4	0.117092292898626	1	1	NA
GM18501	1	NM_018358.2	ABCF3	4_5_6	6->5->4	0.944055944055944	1	0.085570965400613	1	1	NA
GM18501	2	NM_018358.2	ABCF3	4_5_6	6->5->4	0.933333333333333	1	0.085570965400613	1	1	NA
GM18501	1	NM_018358.2	ABCF3	4_5_6	5->6->4	0.0524475524475524	2	0.085570965400613	1	1	NA
GM18501	2	NM_018358.2	ABCF3	4_5_6	6->4->5	0.0666666666666666	2	0.085570965400613	1	1	NA
GM18501	1	NM_018358.2	ABCF3	4_5_6	5->4->6	0.0034965034965034	3	0.085570965400613	1	1	NA
GM18510	1	NM_018358.2	ABCF3	4_5_6	6->5->4	0.923076923076923	1	0.188422287906398	1	1	NA
GM18510	2	NM_018358.2	ABCF3	4_5_6	6->5->4	0.846153846153846	1	0.188422287906398	1	1	NA
GM18510	1	NM_018358.2	ABCF3	4_5_6	5->6->4	0.0769230769230769	2	0.188422287906398	1	1	NA
GM18510	2	NM_018358.2	ABCF3	4_5_6	6->4->5	0.153846153846154	2	0.188422287906398	1	1	NA
GM18861	1	NM_018358.2	ABCF3	4_5_6	6->5->4	0.875	1	0.0935876622158665	1	1	NA
GM18861	2	NM_018358.2	ABCF3	4_5_6	6->5->4	0.941176470588235	1	0.0935876622158665	1	1	NA
GM18861	1	NM_018358.2	ABCF3	4_5_6	6->4->5	0.125	2	0.0935876622158665	1	1	NA
GM18861	2	NM_018358.2	ABCF3	4_5_6	6->4->5	0.0588235294117647	2	0.0935876622158665	1	1	NA
GM19144	1	NM_018358.2	ABCF3	4_5_6	6->5->4	0.9	1	0.14142135623731	1	1	NA
GM19144	2	NM_018358.2	ABCF3	4_5_6	6->5->4	1	1	0.14142135623731	1	1	NA
GM19144	1	NM_018358.2	ABCF3	4_5_6	6->4->5	0.1	2	0.14142135623731	1	1	NA
GM19152	1	NM_018358.2	ABCF3	4_5_6	6->5->4	0.919866444073456	1	0.069165791675609	1	1	NA
GM19152	2	NM_018358.2	ABCF3	4_5_6	6->5->4	0.976190476190476	1	0.069165791675609	1	1	NA
GM19152	1	NM_018358.2	ABCF3	4_5_6	6->4->5	0.0484140233722871	2	0.069165791675609	1	1	NA
GM19152	2	NM_018358.2	ABCF3	4_5_6	6->4->5	0.0238095238095238	2	0.069165791675609	1	1	NA
GM19152	1	NM_018358.2	ABCF3	4_5_6	5->6->4	0.031719532554257	3	0.069165791675609	1	1	NA
GM19152	1	NM_018358.2	ABCF3	5_6_7	7->6->5	0.87	1	0.547844260108047	0.882652278944515	0.47863670635139	NA
GM19152	2	NM_018358.2	ABCF3	5_6_7	7->6->5	0.5	1	0.547844260108047	0.882652278944515	0.47863670635139	NA
GM19152	1	NM_018358.2	ABCF3	5_6_7	6->7->5	0.0966666666666666	2	0.547844260108047	0.882652278944515	0.47863670635139	NA
GM19152	2	NM_018358.2	ABCF3	5_6_7	6->7->5	0.5	2	0.547844260108047	0.882652278944515	0.47863670635139	NA
GM19152	1	NM_018358.2	ABCF3	5_6_7	6->5->7	0.0166666666666666	3	0.547844260108047	0.882652278944515	0.47863670635139	NA
GM19152	1	NM_018358.2	ABCF3	5_6_7	5->6->7	0.0166666666666666	4	0.547844260108047	0.882652278944515	0.47863670635139	NA
GM19152	1	NM_001177515.1	ABHD16A	13_12_11	12->11->13	0.819875776397516	1	0.361437676443904	1	0.911987914515966	NA
GM19152	2	NM_001177515.1	ABHD16A	13_12_11	12->11->13	0.520661157024793	1	0.361437676443904	1	0.911987914515966	NA
GM19152	1	NM_001177515.1	ABHD16A	13_12_11	12->13->11	0.111801242236025	2	0.361437676443904	1	0.911987914515966	NA
GM19152	2	NM_001177515.1	ABHD16A	13_12_11	12->13->11	0.297520661157025	2	0.361437676443904	1	0.911987914515966	NA
GM19152	1	NM_001177515.1	ABHD16A	13_12_11	11->12->13	0.0683229813664596	3	0.361437676443904	1	0.911987914515966	NA
GM19152	2	NM_001177515.1	ABHD16A	13_12_11	11->12->13	0.115702479338843	3	0.361437676443904	1	0.911987914515966	NA
GM19152	2	NM_001177515.1	ABHD16A	13_12_11	13->12->11	0.0661157024793388	4	0.361437676443904	1	0.911987914515966	NA
GM18853	1	NM_001130111.1	ABHD17A	4_3_2	2->4->3	0.777777777777778	1	0.10198667901507	1	1	NA
GM18853	2	NM_001130111.1	ABHD17A	4_3_2	2->4->3	0.696517412935323	1	0.10198667901507	1	1	NA
GM18853	1	NM_001130111.1	ABHD17A	4_3_2	4->2->3	0.222222222222222	2	0.10198667901507	1	1	NA
GM18853	2	NM_001130111.1	ABHD17A	4_3_2	4->2->3	0.278606965174129	2	0.10198667901507	1	1	NA
GM18853	2	NM_001130111.1	ABHD17A	4_3_2	2->3->4	0.0248756218905472	3	0.10198667901507	1	1	NA
GM19102	1	NM_001130111.1	ABHD17A	4_3_2	2->4->3	0.5859375	1	0.303922573374795	1	1	NA
GM19102	2	NM_001130111.1	ABHD17A	4_3_2	2->4->3	0.795061728395062	1	0.303922573374795	1	1	NA
GM19102	1	NM_001130111.1	ABHD17A	4_3_2	4->2->3	0.390625	2	0.303922573374795	1	1	NA
GM19102	2	NM_001130111.1	ABHD17A	4_3_2	4->2->3	0.17037037037037	2	0.303922573374795	1	1	NA
GM19102	1	NM_001130111.1	ABHD17A	4_3_2	2->3->4	0.0234375	3	0.303922573374795	1	1	NA
GM19102	2	NM_001130111.1	ABHD17A	4_3_2	2->3->4	0.0345679012345679	3	0.303922573374795	1	1	NA
GM19144	1	NM_001130111.1	ABHD17A	4_3_2	2->4->3	0.931392931392931	1	0.0955888892521633	1	1	NA
GM19144	2	NM_001130111.1	ABHD17A	4_3_2	2->4->3	1	1	0.0955888892521633	1	1	NA
GM19144	1	NM_001130111.1	ABHD17A	4_3_2	4->2->3	0.0665280665280665	2	0.0955888892521633	1	1	NA
GM19144	1	NM_001130111.1	ABHD17A	4_3_2	4->3->2	0.002079002079002	3	0.0955888892521633	1	1	NA
GM19209	1	NM_001130111.1	ABHD17A	4_3_2	2->4->3	0.811019283746557	1	0.0178076841580713	1	1	NA
GM19209	2	NM_001130111.1	ABHD17A	4_3_2	2->4->3	0.823529411764706	1	0.0178076841580713	1	1	NA
GM19209	1	NM_001130111.1	ABHD17A	4_3_2	4->2->3	0.176308539944904	2	0.0178076841580713	1	1	NA
GM19209	2	NM_001130111.1	ABHD17A	4_3_2	4->2->3	0.176470588235294	2	0.0178076841580713	1	1	NA
GM19209	1	NM_001130111.1	ABHD17A	4_3_2	2->3->4	0.0126721763085399	3	0.0178076841580713	1	1	NA
GM19152	1	NM_001130111.1	ABHD17A	4_3_2	2->4->3	0.840613931523022	1	0.0184111330602603	1	1	NA
GM19152	2	NM_001130111.1	ABHD17A	4_3_2	2->4->3	0.828571428571429	1	0.0184111330602603	1	1	NA
GM19152	1	NM_001130111.1	ABHD17A	4_3_2	4->2->3	0.157615112160567	2	0.0184111330602603	1	1	NA
GM19152	2	NM_001130111.1	ABHD17A	4_3_2	4->2->3	0.171428571428571	2	0.0184111330602603	1	1	NA
GM19152	1	NM_001130111.1	ABHD17A	4_3_2	4->3->2	0.0017709563164108	3	0.0184111330602603	1	1	NA
GM18501	1	NM_001607.3	ACAA1	9_8_7	7->9->8	0.954128440366972	1	0.052572249987462	0.486222890317772	1	NA
GM18501	2	NM_001607.3	ACAA1	9_8_7	7->9->8	0.929126213592233	1	0.052572249987462	0.486222890317772	1	NA
GM18501	1	NM_001607.3	ACAA1	9_8_7	7->8->9	0.0458715596330275	2	0.052572249987462	0.486222890317772	1	NA
GM18501	2	NM_001607.3	ACAA1	9_8_7	9->7->8	0.0427184466019417	2	0.052572249987462	0.486222890317772	1	NA
GM18501	2	NM_001607.3	ACAA1	9_8_7	7->8->9	0.0281553398058252	3	0.052572249987462	0.486222890317772	1	NA
GM18510	1	NM_001607.3	ACAA1	9_8_7	7->9->8	0.96466759646676	1	0.0429539758796481	0.975363531254566	1	NA
GM18510	2	NM_001607.3	ACAA1	9_8_7	7->9->8	0.980769230769231	1	0.0429539758796481	0.975363531254566	1	NA
GM18510	1	NM_001607.3	ACAA1	9_8_7	9->7->8	0.0348675034867503	2	0.0429539758796481	0.975363531254566	1	NA
GM18510	2	NM_001607.3	ACAA1	9_8_7	7->8->9	0.0192307692307692	2	0.0429539758796481	0.975363531254566	1	NA
GM18510	1	NM_001607.3	ACAA1	9_8_7	9->8->7	0.00046490004649	3	0.0429539758796481	0.975363531254566	1	NA
GM18522	1	NM_001607.3	ACAA1	9_8_7	7->9->8	1	1	0.02772967769359	1	1	NA
GM18522	2	NM_001607.3	ACAA1	9_8_7	7->9->8	0.980392156862745	1	0.02772967769359	1	1	NA
GM18522	2	NM_001607.3	ACAA1	9_8_7	7->8->9	0.0196078431372549	2	0.02772967769359	1	1	NA
GM18870	1	NM_001607.3	ACAA1	9_8_7	7->9->8	0.954545454545455	1	0.0559010595480761	1	1	NA
GM18870	2	NM_001607.3	ACAA1	9_8_7	7->9->8	0.973684210526316	1	0.0559010595480761	1	1	NA
GM18870	1	NM_001607.3	ACAA1	9_8_7	9->7->8	0.0454545454545454	2	0.0559010595480761	1	1	NA
GM18870	2	NM_001607.3	ACAA1	9_8_7	7->8->9	0.0263157894736842	2	0.0559010595480761	1	1	NA
GM18510	1	NM_000017.3	ACADS	2_3_4	2->4->3	0.931034482758621	1	0.0958378150657325	1	1	NA
GM18510	2	NM_000017.3	ACADS	2_3_4	2->4->3	1	1	0.0958378150657325	1	1	NA
GM18510	1	NM_000017.3	ACADS	2_3_4	4->2->3	0.0665024630541871	2	0.0958378150657325	1	1	NA
GM18510	1	NM_000017.3	ACADS	2_3_4	4->3->2	0.0024630541871921	3	0.0958378150657325	1	1	NA
GM19209	1	NM_000017.3	ACADS	2_3_4	2->4->3	1	1	0.217571317288168	1	1	NA
GM19209	2	NM_000017.3	ACADS	2_3_4	2->4->3	0.846153846153846	1	0.217571317288168	1	1	NA
GM19209	2	NM_000017.3	ACADS	2_3_4	4->2->3	0.153846153846154	2	0.217571317288168	1	1	NA
GM18510	1	NM_000017.3	ACADS	3_4_5	5->4->3	0.8	1	0.102851895445316	1	1	NA
GM18510	2	NM_000017.3	ACADS	3_4_5	5->4->3	0.727272727272727	1	0.102851895445316	1	1	NA
GM18510	1	NM_000017.3	ACADS	3_4_5	4->5->3	0.2	2	0.102851895445316	1	1	NA
GM18510	2	NM_000017.3	ACADS	3_4_5	4->5->3	0.272727272727273	2	0.102851895445316	1	1	NA
GM18853	1	NM_000017.3	ACADS	3_4_5	5->4->3	0.872053872053872	1	0.057288550596544	1	1	NA
GM18853	2	NM_000017.3	ACADS	3_4_5	5->4->3	0.833333333333333	1	0.057288550596544	1	1	NA
GM18853	1	NM_000017.3	ACADS	3_4_5	4->5->3	0.124579124579124	2	0.057288550596544	1	1	NA
GM18853	2	NM_000017.3	ACADS	3_4_5	4->5->3	0.166666666666667	2	0.057288550596544	1	1	NA
GM18853	1	NM_000017.3	ACADS	3_4_5	4->3->5	0.0033670033670033	3	0.057288550596544	1	1	NA
GM19209	1	NM_000017.3	ACADS	3_4_5	5->4->3	0.666666666666667	1	0.294627825494395	1	1	NA
GM19209	2	NM_000017.3	ACADS	3_4_5	5->4->3	0.875	1	0.294627825494395	1	1	NA
GM19209	1	NM_000017.3	ACADS	3_4_5	4->5->3	0.333333333333333	2	0.294627825494395	1	1	NA
GM19209	2	NM_000017.3	ACADS	3_4_5	4->5->3	0.125	2	0.294627825494395	1	1	NA
GM19102	1	NM_000018.3	ACADVL	10_11_12	12->11->10	0.571428571428571	1	0.464670170494017	1	1	NA
GM19102	2	NM_000018.3	ACADVL	10_11_12	12->11->10	0.9	1	0.464670170494017	1	1	NA
GM19102	1	NM_000018.3	ACADVL	10_11_12	11->12->10	0.428571428571428	2	0.464670170494017	1	1	NA
GM19102	2	NM_000018.3	ACADVL	10_11_12	11->12->10	0.1	2	0.464670170494017	1	1	NA
GM19152	1	NM_000018.3	ACADVL	10_11_12	12->11->10	0.657142857142857	1	0.0323248814256707	1	1	NA
GM19152	2	NM_000018.3	ACADVL	10_11_12	12->11->10	0.68	1	0.0323248814256707	1	1	NA
GM19152	1	NM_000018.3	ACADVL	10_11_12	11->12->10	0.342857142857143	2	0.0323248814256707	1	1	NA
GM19152	2	NM_000018.3	ACADVL	10_11_12	11->12->10	0.32	2	0.0323248814256707	1	1	NA
GM18510	1	NM_000018.3	ACADVL	11_12_13	12->11->13	0.628571428571429	1	0.172762623616004	1	1	NA
GM18510	2	NM_000018.3	ACADVL	11_12_13	12->11->13	0.677966101694915	1	0.172762623616004	1	1	NA
GM18510	1	NM_000018.3	ACADVL	11_12_13	11->12->13	0.314285714285714	2	0.172762623616004	1	1	NA
GM18510	2	NM_000018.3	ACADVL	11_12_13	11->12->13	0.169491525423729	2	0.172762623616004	1	1	NA
GM18510	1	NM_000018.3	ACADVL	11_12_13	12->13->11	0.0571428571428571	3	0.172762623616004	1	1	NA
GM18510	2	NM_000018.3	ACADVL	11_12_13	12->13->11	0.135593220338983	3	0.172762623616004	1	1	NA
GM18510	2	NM_000018.3	ACADVL	11_12_13	13->12->11	0.0169491525423728	4	0.172762623616004	1	1	NA
GM19209	1	NM_000018.3	ACADVL	11_12_13	12->11->13	0.531791907514451	1	0.268420021753629	1	0.99513601824488	NA
GM19209	2	NM_000018.3	ACADVL	11_12_13	12->11->13	0.741935483870968	1	0.268420021753629	1	0.99513601824488	NA
GM19209	1	NM_000018.3	ACADVL	11_12_13	11->12->13	0.398843930635838	2	0.268420021753629	1	0.99513601824488	NA
GM19209	2	NM_000018.3	ACADVL	11_12_13	11->12->13	0.247311827956989	2	0.268420021753629	1	0.99513601824488	NA
GM19209	1	NM_000018.3	ACADVL	11_12_13	12->13->11	0.0693641618497109	3	0.268420021753629	1	0.99513601824488	NA
GM19209	2	NM_000018.3	ACADVL	11_12_13	11->13->12	0.010752688172043	3	0.268420021753629	1	0.99513601824488	NA
GM19152	1	NM_000018.3	ACADVL	11_12_13	12->11->13	0.597087378640777	1	0.163229978288313	1	1	NA
GM19152	2	NM_000018.3	ACADVL	11_12_13	12->11->13	0.4644128113879	1	0.163229978288313	1	1	NA
GM19152	1	NM_000018.3	ACADVL	11_12_13	11->12->13	0.298543689320388	2	0.163229978288313	1	1	NA
GM19152	2	NM_000018.3	ACADVL	11_12_13	11->12->13	0.361209964412811	2	0.163229978288313	1	1	NA
GM19152	1	NM_000018.3	ACADVL	11_12_13	12->13->11	0.0728155339805825	3	0.163229978288313	1	1	NA
GM19152	2	NM_000018.3	ACADVL	11_12_13	12->13->11	0.144128113879004	3	0.163229978288313	1	1	NA
GM19152	1	NM_000018.3	ACADVL	11_12_13	11->13->12	0.0145631067961165	4	0.163229978288313	1	1	NA
GM19152	2	NM_000018.3	ACADVL	11_12_13	13->12->11	0.0160142348754448	4	0.163229978288313	1	1	NA
GM19152	1	NM_000018.3	ACADVL	11_12_13	13->12->11	0.012135922330097	5	0.163229978288313	1	1	NA
GM19152	2	NM_000018.3	ACADVL	11_12_13	11->13->12	0.0124555160142348	5	0.163229978288313	1	1	NA
GM19152	1	NM_000018.3	ACADVL	11_12_13	13->11->12	0.0048543689320388	6	0.163229978288313	1	1	NA
GM19152	2	NM_000018.3	ACADVL	11_12_13	13->11->12	0.0017793594306049	6	0.163229978288313	1	1	NA
GM19102	1	NM_000018.3	ACADVL	12_13_14	12->14->13	0.546099290780142	1	0.0755762050266939	1	1	NA
GM19102	2	NM_000018.3	ACADVL	12_13_14	12->14->13	0.555555555555556	1	0.0755762050266939	1	1	NA
GM19102	1	NM_000018.3	ACADVL	12_13_14	12->13->14	0.390070921985816	2	0.0755762050266939	1	1	NA
GM19102	2	NM_000018.3	ACADVL	12_13_14	12->13->14	0.444444444444444	2	0.0755762050266939	1	1	NA
GM19102	1	NM_000018.3	ACADVL	12_13_14	14->12->13	0.0496453900709219	3	0.0755762050266939	1	1	NA
GM19102	1	NM_000018.3	ACADVL	12_13_14	14->13->12	0.0141843971631205	4	0.0755762050266939	1	1	NA
GM19209	1	NM_000018.3	ACADVL	12_13_14	12->14->13	0.540925266903915	1	0.27334628537653	0.937781920537626	1	NA
GM19209	2	NM_000018.3	ACADVL	12_13_14	12->14->13	0.517857142857143	1	0.27334628537653	0.937781920537626	1	NA
GM19209	1	NM_000018.3	ACADVL	12_13_14	14->12->13	0.256227758007117	2	0.27334628537653	0.937781920537626	1	NA
GM19209	2	NM_000018.3	ACADVL	12_13_14	12->13->14	0.402777777777778	2	0.27334628537653	0.937781920537626	1	NA
GM19209	1	NM_000018.3	ACADVL	12_13_14	12->13->14	0.202846975088968	3	0.27334628537653	0.937781920537626	1	NA
GM19209	2	NM_000018.3	ACADVL	12_13_14	14->12->13	0.0714285714285714	3	0.27334628537653	0.937781920537626	1	NA
GM19209	2	NM_000018.3	ACADVL	12_13_14	14->13->12	0.0079365079365079	4	0.27334628537653	0.937781920537626	1	NA
GM19152	1	NM_000018.3	ACADVL	12_13_14	12->14->13	0.653393665158371	1	0.639028365293992	1	0.0194741641966333	NA
GM19152	2	NM_000018.3	ACADVL	12_13_14	12->13->14	0.674418604651163	1	0.639028365293992	1	0.0194741641966333	NA
GM19152	1	NM_000018.3	ACADVL	12_13_14	12->13->14	0.171945701357466	2	0.639028365293992	1	0.0194741641966333	NA
GM19152	2	NM_000018.3	ACADVL	12_13_14	12->14->13	0.269767441860465	2	0.639028365293992	1	0.0194741641966333	NA
GM19152	1	NM_000018.3	ACADVL	12_13_14	14->12->13	0.137556561085973	3	0.639028365293992	1	0.0194741641966333	NA
GM19152	2	NM_000018.3	ACADVL	12_13_14	14->12->13	0.0465116279069767	3	0.639028365293992	1	0.0194741641966333	NA
GM19152	1	NM_000018.3	ACADVL	12_13_14	14->13->12	0.0289592760180995	4	0.639028365293992	1	0.0194741641966333	NA
GM19152	2	NM_000018.3	ACADVL	12_13_14	14->13->12	0.0093023255813953	4	0.639028365293992	1	0.0194741641966333	NA
GM19152	1	NM_000018.3	ACADVL	12_13_14	13->12->14	0.004524886877828	5	0.639028365293992	1	0.0194741641966333	NA
GM19152	1	NM_000018.3	ACADVL	12_13_14	13->14->12	0.0036199095022624	6	0.639028365293992	1	0.0194741641966333	NA
GM19209	1	NM_000018.3	ACADVL	13_14_15	15->14->13	0.933908045977011	1	0.163612750930866	1	1	NA
GM19209	2	NM_000018.3	ACADVL	13_14_15	15->14->13	0.8	1	0.163612750930866	1	1	NA
GM19209	1	NM_000018.3	ACADVL	13_14_15	15->13->14	0.0373563218390804	2	0.163612750930866	1	1	NA
GM19209	2	NM_000018.3	ACADVL	13_14_15	15->13->14	0.123076923076923	2	0.163612750930866	1	1	NA
GM19209	1	NM_000018.3	ACADVL	13_14_15	13->15->14	0.014367816091954	3	0.163612750930866	1	1	NA
GM19209	2	NM_000018.3	ACADVL	13_14_15	13->15->14	0.0512820512820512	3	0.163612750930866	1	1	NA
GM19209	1	NM_000018.3	ACADVL	13_14_15	13->14->15	0.014367816091954	4	0.163612750930866	1	1	NA
GM19209	2	NM_000018.3	ACADVL	13_14_15	13->14->15	0.0256410256410256	4	0.163612750930866	1	1	NA
GM19152	1	NM_000018.3	ACADVL	13_14_15	15->14->13	0.776119402985075	1	0.494592934333584	1	0.154171370974044	NA
GM19152	2	NM_000018.3	ACADVL	13_14_15	15->14->13	0.441441441441441	1	0.494592934333584	1	0.154171370974044	NA
GM19152	1	NM_000018.3	ACADVL	13_14_15	14->15->13	0.17910447761194	2	0.494592934333584	1	0.154171370974044	NA
GM19152	2	NM_000018.3	ACADVL	13_14_15	15->13->14	0.252252252252252	2	0.494592934333584	1	0.154171370974044	NA
GM19152	1	NM_000018.3	ACADVL	13_14_15	13->14->15	0.0298507462686567	3	0.494592934333584	1	0.154171370974044	NA
GM19152	2	NM_000018.3	ACADVL	13_14_15	13->15->14	0.204204204204204	3	0.494592934333584	1	0.154171370974044	NA
GM19152	1	NM_000018.3	ACADVL	13_14_15	14->13->15	0.0149253731343283	4	0.494592934333584	1	0.154171370974044	NA
GM19152	2	NM_000018.3	ACADVL	13_14_15	13->14->15	0.0765765765765765	4	0.494592934333584	1	0.154171370974044	NA
GM19152	2	NM_000018.3	ACADVL	13_14_15	14->15->13	0.021021021021021	5	0.494592934333584	1	0.154171370974044	NA
GM19152	2	NM_000018.3	ACADVL	13_14_15	14->13->15	0.0045045045045045	6	0.494592934333584	1	0.154171370974044	NA
GM19209	1	NM_000018.3	ACADVL	14_15_16	16->15->14	0.933333333333333	1	0.0382293839171809	1	1	NA
GM19209	2	NM_000018.3	ACADVL	14_15_16	16->15->14	0.904135338345865	1	0.0382293839171809	1	1	NA
GM19209	1	NM_000018.3	ACADVL	14_15_16	16->14->15	0.0666666666666666	2	0.0382293839171809	1	1	NA
GM19209	2	NM_000018.3	ACADVL	14_15_16	16->14->15	0.0695488721804511	2	0.0382293839171809	1	1	NA
GM19209	2	NM_000018.3	ACADVL	14_15_16	15->16->14	0.0244360902255639	3	0.0382293839171809	1	1	NA
GM19209	2	NM_000018.3	ACADVL	14_15_16	15->14->16	0.0018796992481203	4	0.0382293839171809	1	1	NA
GM19152	1	NM_000018.3	ACADVL	14_15_16	16->15->14	0.722222222222222	1	0.197299263809034	1	0.991883054441048	NA
GM19152	2	NM_000018.3	ACADVL	14_15_16	16->15->14	0.844168734491315	1	0.197299263809034	1	0.991883054441048	NA
GM19152	1	NM_000018.3	ACADVL	14_15_16	16->14->15	0.277777777777778	2	0.197299263809034	1	0.991883054441048	NA
GM19152	2	NM_000018.3	ACADVL	14_15_16	16->14->15	0.125062034739454	2	0.197299263809034	1	0.991883054441048	NA
GM19152	2	NM_000018.3	ACADVL	14_15_16	15->16->14	0.0267990074441687	3	0.197299263809034	1	0.991883054441048	NA
GM19152	2	NM_000018.3	ACADVL	14_15_16	15->14->16	0.003970223325062	4	0.197299263809034	1	0.991883054441048	NA
GM18510	1	NM_000018.3	ACADVL	15_16_17	16->15->17	0.728506787330317	1	0.260984785419406	1	0.867586720952909	NA
GM18510	2	NM_000018.3	ACADVL	15_16_17	16->15->17	0.944444444444444	1	0.260984785419406	1	0.867586720952909	NA
GM18510	1	NM_000018.3	ACADVL	15_16_17	16->17->15	0.158371040723982	2	0.260984785419406	1	0.867586720952909	NA
GM18510	2	NM_000018.3	ACADVL	15_16_17	16->17->15	0.0555555555555555	2	0.260984785419406	1	0.867586720952909	NA
GM18510	1	NM_000018.3	ACADVL	15_16_17	15->16->17	0.104072398190045	3	0.260984785419406	1	0.867586720952909	NA
GM18510	1	NM_000018.3	ACADVL	15_16_17	15->17->16	0.0090497737556561	4	0.260984785419406	1	0.867586720952909	NA
GM19102	1	NM_000018.3	ACADVL	15_16_17	16->15->17	1	1	0.128564869306645	1	1	NA
GM19102	2	NM_000018.3	ACADVL	15_16_17	16->15->17	0.909090909090909	1	0.128564869306645	1	1	NA
GM19102	2	NM_000018.3	ACADVL	15_16_17	16->17->15	0.0909090909090909	2	0.128564869306645	1	1	NA
GM19209	1	NM_000018.3	ACADVL	15_16_17	16->15->17	0.932203389830508	1	0.0745950655504699	1	1	NA
GM19209	2	NM_000018.3	ACADVL	15_16_17	16->15->17	0.87129840546697	1	0.0745950655504699	1	1	NA
GM19209	1	NM_000018.3	ACADVL	15_16_17	16->17->15	0.0466101694915254	2	0.0745950655504699	1	1	NA
GM19209	2	NM_000018.3	ACADVL	15_16_17	16->17->15	0.0774487471526196	2	0.0745950655504699	1	1	NA
GM19209	1	NM_000018.3	ACADVL	15_16_17	15->16->17	0.0211864406779661	3	0.0745950655504699	1	1	NA
GM19209	2	NM_000018.3	ACADVL	15_16_17	15->16->17	0.05125284738041	3	0.0745950655504699	1	1	NA
GM19152	1	NM_000018.3	ACADVL	15_16_17	16->15->17	0.867032213845099	1	0.0377731288797464	1	1	NA
GM19152	2	NM_000018.3	ACADVL	15_16_17	16->15->17	0.840034587116299	1	0.0377731288797464	1	1	NA
GM19152	1	NM_000018.3	ACADVL	15_16_17	16->17->15	0.100525474068997	2	0.0377731288797464	1	1	NA
GM19152	2	NM_000018.3	ACADVL	15_16_17	16->17->15	0.100302637267618	2	0.0377731288797464	1	1	NA
GM19152	1	NM_000018.3	ACADVL	15_16_17	15->16->17	0.0315284441398217	3	0.0377731288797464	1	1	NA
GM19152	2	NM_000018.3	ACADVL	15_16_17	15->16->17	0.057933419801124	3	0.0377731288797464	1	1	NA
GM19152	1	NM_000018.3	ACADVL	15_16_17	15->17->16	0.0009138679460817	4	0.0377731288797464	1	1	NA
GM19152	2	NM_000018.3	ACADVL	15_16_17	15->17->16	0.0017293558149589	4	0.0377731288797464	1	1	NA
GM18510	1	NM_000018.3	ACADVL	16_17_18	16->18->17	0.893382352941177	1	0.14585907665351	1	1	NA
GM18510	2	NM_000018.3	ACADVL	16_17_18	16->18->17	1	1	0.14585907665351	1	1	NA
GM18510	1	NM_000018.3	ACADVL	16_17_18	18->16->17	0.0992647058823529	2	0.14585907665351	1	1	NA
GM18510	1	NM_000018.3	ACADVL	16_17_18	18->17->16	0.0073529411764705	3	0.14585907665351	1	1	NA
GM19102	1	NM_000018.3	ACADVL	16_17_18	16->18->17	0.915221579961464	1	0.0633028312942258	1	1	NA
GM19102	2	NM_000018.3	ACADVL	16_17_18	16->18->17	0.923076923076923	1	0.0633028312942258	1	1	NA
GM19102	1	NM_000018.3	ACADVL	16_17_18	18->16->17	0.048169556840077	2	0.0633028312942258	1	1	NA
GM19102	2	NM_000018.3	ACADVL	16_17_18	16->17->18	0.0769230769230769	2	0.0633028312942258	1	1	NA
GM19102	1	NM_000018.3	ACADVL	16_17_18	16->17->18	0.0366088631984585	3	0.0633028312942258	1	1	NA
GM19209	1	NM_000018.3	ACADVL	16_17_18	16->18->17	0.964912280701754	1	0.0335675045764513	1	1	NA
GM19209	2	NM_000018.3	ACADVL	16_17_18	16->18->17	0.941176470588235	1	0.0335675045764513	1	1	NA
GM19209	1	NM_000018.3	ACADVL	16_17_18	18->16->17	0.0350877192982456	2	0.0335675045764513	1	1	NA
GM19209	2	NM_000018.3	ACADVL	16_17_18	18->16->17	0.0588235294117647	2	0.0335675045764513	1	1	NA
GM19152	1	NM_000018.3	ACADVL	16_17_18	16->18->17	0.911106084596245	1	0.0182249752475026	1	1	NA
GM19152	2	NM_000018.3	ACADVL	16_17_18	16->18->17	0.92596734511295	1	0.0182249752475026	1	1	NA
GM19152	1	NM_000018.3	ACADVL	16_17_18	16->17->18	0.0515720425243157	2	0.0182249752475026	1	1	NA
GM19152	2	NM_000018.3	ACADVL	16_17_18	16->17->18	0.0462983672556475	2	0.0182249752475026	1	1	NA
GM19152	1	NM_000018.3	ACADVL	16_17_18	18->16->17	0.0359647138656412	3	0.0182249752475026	1	1	NA
GM19152	2	NM_000018.3	ACADVL	16_17_18	18->16->17	0.0268396331916797	3	0.0182249752475026	1	1	NA
GM19152	1	NM_000018.3	ACADVL	16_17_18	18->17->16	0.0013571590137977	4	0.0182249752475026	1	1	NA
GM19152	2	NM_000018.3	ACADVL	16_17_18	18->17->16	0.0008946544397226	4	0.0182249752475026	1	1	NA
GM18510	1	NM_000018.3	ACADVL	17_18_19	19->18->17	0.874730021598272	1	0.0679572404481865	1	1	NA
GM18510	2	NM_000018.3	ACADVL	17_18_19	19->18->17	0.925	1	0.0679572404481865	1	1	NA
GM18510	1	NM_000018.3	ACADVL	17_18_19	18->19->17	0.116630669546436	2	0.0679572404481865	1	1	NA
GM18510	2	NM_000018.3	ACADVL	17_18_19	18->19->17	0.0711538461538461	2	0.0679572404481865	1	1	NA
GM18510	1	NM_000018.3	ACADVL	17_18_19	18->17->19	0.0086393088552915	3	0.0679572404481865	1	1	NA
GM18510	2	NM_000018.3	ACADVL	17_18_19	18->17->19	0.0038461538461538	3	0.0679572404481865	1	1	NA
GM19209	1	NM_000018.3	ACADVL	17_18_19	19->18->17	0.923076923076923	1	0.0440305665614896	1	1	NA
GM19209	2	NM_000018.3	ACADVL	17_18_19	19->18->17	0.890909090909091	1	0.0440305665614896	1	1	NA
GM19209	1	NM_000018.3	ACADVL	17_18_19	18->19->17	0.0769230769230769	2	0.0440305665614896	1	1	NA
GM19209	2	NM_000018.3	ACADVL	17_18_19	18->19->17	0.106909090909091	2	0.0440305665614896	1	1	NA
GM19209	2	NM_000018.3	ACADVL	17_18_19	18->17->19	0.0021818181818181	3	0.0440305665614896	1	1	NA
GM19152	1	NM_000018.3	ACADVL	17_18_19	19->18->17	0.908050089445438	1	0.12419496815355	1	1	NA
GM19152	2	NM_000018.3	ACADVL	17_18_19	19->18->17	0.821778829895164	1	0.12419496815355	1	1	NA
GM19152	1	NM_000018.3	ACADVL	17_18_19	19->17->18	0.0504472271914132	2	0.12419496815355	1	1	NA
GM19152	2	NM_000018.3	ACADVL	17_18_19	18->19->17	0.127832262428137	2	0.12419496815355	1	1	NA
GM19152	1	NM_000018.3	ACADVL	17_18_19	18->19->17	0.0386404293381037	3	0.12419496815355	1	1	NA
GM19152	2	NM_000018.3	ACADVL	17_18_19	19->17->18	0.0456543794386202	3	0.12419496815355	1	1	NA
GM19152	1	NM_000018.3	ACADVL	17_18_19	18->17->19	0.0028622540250447	4	0.12419496815355	1	1	NA
GM19152	2	NM_000018.3	ACADVL	17_18_19	18->17->19	0.0047345282380791	4	0.12419496815355	1	1	NA
GM18510	1	NM_000018.3	ACADVL	1_2_3	1->2->3	0.9	1	0.236439603467758	1	1	NA
GM18510	2	NM_000018.3	ACADVL	1_2_3	1->2->3	0.724137931034483	1	0.236439603467758	1	1	NA
GM18510	1	NM_000018.3	ACADVL	1_2_3	2->3->1	0.05	2	0.236439603467758	1	1	NA
GM18510	2	NM_000018.3	ACADVL	1_2_3	2->1->3	0.206896551724138	2	0.236439603467758	1	1	NA
GM18510	1	NM_000018.3	ACADVL	1_2_3	2->1->3	0.05	3	0.236439603467758	1	1	NA
GM18510	2	NM_000018.3	ACADVL	1_2_3	2->3->1	0.0689655172413793	3	0.236439603467758	1	1	NA
GM19209	1	NM_000018.3	ACADVL	1_2_3	1->2->3	0.975342465753425	1	0.354002112813742	0.557317437681998	0.242094944593411	NA
GM19209	2	NM_000018.3	ACADVL	1_2_3	1->2->3	0.687116564417178	1	0.354002112813742	0.557317437681998	0.242094944593411	NA
GM19209	1	NM_000018.3	ACADVL	1_2_3	2->1->3	0.021917808219178	2	0.354002112813742	0.557317437681998	0.242094944593411	NA
GM19209	2	NM_000018.3	ACADVL	1_2_3	2->3->1	0.165644171779141	2	0.354002112813742	0.557317437681998	0.242094944593411	NA
GM19209	1	NM_000018.3	ACADVL	1_2_3	2->3->1	0.0027397260273972	3	0.354002112813742	0.557317437681998	0.242094944593411	NA
GM19209	2	NM_000018.3	ACADVL	1_2_3	2->1->3	0.147239263803681	3	0.354002112813742	0.557317437681998	0.242094944593411	NA
GM19152	1	NM_000018.3	ACADVL	1_2_3	1->2->3	0.594989561586639	1	0.0475510918611677	1	1	NA
GM19152	2	NM_000018.3	ACADVL	1_2_3	1->2->3	0.569543147208122	1	0.0475510918611677	1	1	NA
GM19152	1	NM_000018.3	ACADVL	1_2_3	2->3->1	0.279749478079332	2	0.0475510918611677	1	1	NA
GM19152	2	NM_000018.3	ACADVL	1_2_3	2->3->1	0.25989847715736	2	0.0475510918611677	1	1	NA
GM19152	1	NM_000018.3	ACADVL	1_2_3	2->1->3	0.125260960334029	3	0.0475510918611677	1	1	NA
GM19152	2	NM_000018.3	ACADVL	1_2_3	2->1->3	0.138071065989848	3	0.0475510918611677	1	1	NA
GM19152	2	NM_000018.3	ACADVL	1_2_3	3->2->1	0.03248730964467	4	0.0475510918611677	1	1	NA
GM19152	1	NM_001033859.2	ACADVL	1_2_3	3->1->2	0.974358974358974	1	0.149818845676502	1	1	NA
GM19152	2	NM_001033859.2	ACADVL	1_2_3	3->1->2	0.868421052631579	1	0.149818845676502	1	1	NA
GM19152	1	NM_001033859.2	ACADVL	1_2_3	3->2->1	0.0256410256410256	2	0.149818845676502	1	1	NA
GM19152	2	NM_001033859.2	ACADVL	1_2_3	3->2->1	0.131578947368421	2	0.149818845676502	1	1	NA
GM19209	1	NM_000018.3	ACADVL	2_3_4	4->2->3	0.947368421052632	1	0.139390998330281	0.542895569011139	1	NA
GM19209	2	NM_000018.3	ACADVL	2_3_4	4->2->3	0.836	1	0.139390998330281	0.542895569011139	1	NA
GM19209	1	NM_000018.3	ACADVL	2_3_4	4->3->2	0.0526315789473684	2	0.139390998330281	0.542895569011139	1	NA
GM19209	2	NM_000018.3	ACADVL	2_3_4	4->3->2	0.088	2	0.139390998330281	0.542895569011139	1	NA
GM19209	2	NM_000018.3	ACADVL	2_3_4	2->4->3	0.076	3	0.139390998330281	0.542895569011139	1	NA
GM19152	1	NM_000018.3	ACADVL	2_3_4	4->2->3	1	1	0.122975092380269	1	1	NA
GM19152	2	NM_000018.3	ACADVL	2_3_4	4->2->3	0.91304347826087	1	0.122975092380269	1	1	NA
GM19152	2	NM_000018.3	ACADVL	2_3_4	4->3->2	0.0869565217391304	2	0.122975092380269	1	1	NA
GM19152	1	NM_001033859.2	ACADVL	2_3_4	3->4->2	0.941592920353982	1	0.0328981015009422	1	1	NA
GM19152	2	NM_001033859.2	ACADVL	2_3_4	3->4->2	0.962962962962963	1	0.0328981015009422	1	1	NA
GM19152	1	NM_001033859.2	ACADVL	2_3_4	3->2->4	0.0336283185840707	2	0.0328981015009422	1	1	NA
GM19152	2	NM_001033859.2	ACADVL	2_3_4	3->2->4	0.037037037037037	2	0.0328981015009422	1	1	NA
GM19152	1	NM_001033859.2	ACADVL	2_3_4	4->3->2	0.0247787610619469	3	0.0328981015009422	1	1	NA
GM18510	1	NM_000018.3	ACADVL	3_4_5	4->5->3	0.709677419354839	1	0.0790157981542961	1	1	NA
GM18510	2	NM_000018.3	ACADVL	3_4_5	4->5->3	0.645161290322581	1	0.0790157981542961	1	1	NA
GM18510	1	NM_000018.3	ACADVL	3_4_5	4->3->5	0.290322580645161	2	0.0790157981542961	1	1	NA
GM18510	2	NM_000018.3	ACADVL	3_4_5	4->3->5	0.32258064516129	2	0.0790157981542961	1	1	NA
GM18510	2	NM_000018.3	ACADVL	3_4_5	5->4->3	0.032258064516129	3	0.0790157981542961	1	1	NA
GM19223	1	NM_000018.3	ACADVL	3_4_5	4->5->3	0.666666666666667	1	0.370389266335811	1	0.904195589842862	NA
GM19223	2	NM_000018.3	ACADVL	3_4_5	4->5->3	0.928571428571429	1	0.370389266335811	1	0.904195589842862	NA
GM19223	1	NM_000018.3	ACADVL	3_4_5	4->3->5	0.333333333333333	2	0.370389266335811	1	0.904195589842862	NA
GM19223	2	NM_000018.3	ACADVL	3_4_5	4->3->5	0.0714285714285714	2	0.370389266335811	1	0.904195589842862	NA
GM19209	1	NM_000018.3	ACADVL	3_4_5	4->5->3	0.978021978021978	1	0.528026070694376	1	4.94160775101192e-06	NA
GM19209	2	NM_000018.3	ACADVL	3_4_5	4->5->3	0.604651162790698	1	0.528026070694376	1	4.94160775101192e-06	NA
GM19209	1	NM_000018.3	ACADVL	3_4_5	4->3->5	0.0219780219780219	2	0.528026070694376	1	4.94160775101192e-06	NA
GM19209	2	NM_000018.3	ACADVL	3_4_5	4->3->5	0.395348837209302	2	0.528026070694376	1	4.94160775101192e-06	NA
GM19152	1	NM_000018.3	ACADVL	3_4_5	4->5->3	0.674325674325674	1	0.0223194854997738	1	1	NA
GM19152	2	NM_000018.3	ACADVL	3_4_5	4->5->3	0.670454545454545	1	0.0223194854997738	1	1	NA
GM19152	1	NM_000018.3	ACADVL	3_4_5	4->3->5	0.312187812187812	2	0.0223194854997738	1	1	NA
GM19152	2	NM_000018.3	ACADVL	3_4_5	4->3->5	0.329545454545454	2	0.0223194854997738	1	1	NA
GM19152	1	NM_000018.3	ACADVL	3_4_5	5->4->3	0.0134865134865134	3	0.0223194854997738	1	1	NA
GM19152	1	NM_000018.3	ACADVL	4_5_6	4->5->6	0.583401807723911	1	0.0348608107148089	1	1	NA
GM19152	2	NM_000018.3	ACADVL	4_5_6	4->5->6	0.611111111111111	1	0.0348608107148089	1	1	NA
GM19152	1	NM_000018.3	ACADVL	4_5_6	4->6->5	0.408381265406738	2	0.0348608107148089	1	1	NA
GM19152	2	NM_000018.3	ACADVL	4_5_6	4->6->5	0.388888888888889	2	0.0348608107148089	1	1	NA
GM19152	1	NM_000018.3	ACADVL	4_5_6	5->4->6	0.0082169268693508	3	0.0348608107148089	1	1	NA
GM19152	1	NM_000018.3	ACADVL	5_6_7	7->6->5	0.611940298507463	1	0.351170222978222	1	1	NA
GM19152	2	NM_000018.3	ACADVL	5_6_7	7->5->6	0.484463276836158	1	0.351170222978222	1	1	NA
GM19152	1	NM_000018.3	ACADVL	5_6_7	7->5->6	0.203980099502487	2	0.351170222978222	1	1	NA
GM19152	2	NM_000018.3	ACADVL	5_6_7	7->6->5	0.415254237288136	2	0.351170222978222	1	1	NA
GM19152	1	NM_000018.3	ACADVL	5_6_7	5->6->7	0.111940298507463	3	0.351170222978222	1	1	NA
GM19152	2	NM_000018.3	ACADVL	5_6_7	5->7->6	0.0494350282485875	3	0.351170222978222	1	1	NA
GM19152	1	NM_000018.3	ACADVL	5_6_7	5->7->6	0.044776119402985	4	0.351170222978222	1	1	NA
GM19152	2	NM_000018.3	ACADVL	5_6_7	5->6->7	0.0353107344632768	4	0.351170222978222	1	1	NA
GM19152	1	NM_000018.3	ACADVL	5_6_7	6->7->5	0.0149253731343283	5	0.351170222978222	1	1	NA
GM19152	2	NM_000018.3	ACADVL	5_6_7	6->7->5	0.0084745762711864	5	0.351170222978222	1	1	NA
GM19152	1	NM_000018.3	ACADVL	5_6_7	6->5->7	0.0124378109452736	6	0.351170222978222	1	1	NA
GM19152	2	NM_000018.3	ACADVL	5_6_7	6->5->7	0.0070621468926553	6	0.351170222978222	1	1	NA
GM18510	1	NM_000018.3	ACADVL	6_7_8	7->6->8	0.75	1	0.151522881682832	1	1	NA
GM18510	2	NM_000018.3	ACADVL	6_7_8	7->6->8	0.857142857142857	1	0.151522881682832	1	1	NA
GM18510	1	NM_000018.3	ACADVL	6_7_8	6->7->8	0.25	2	0.151522881682832	1	1	NA
GM18510	2	NM_000018.3	ACADVL	6_7_8	6->7->8	0.142857142857143	2	0.151522881682832	1	1	NA
GM19102	1	NM_000018.3	ACADVL	6_7_8	7->6->8	0.922922252010724	1	0.0969929692232743	1	1	NA
GM19102	2	NM_000018.3	ACADVL	6_7_8	7->6->8	1	1	0.0969929692232743	1	1	NA
GM19102	1	NM_000018.3	ACADVL	6_7_8	6->7->8	0.0542895442359249	2	0.0969929692232743	1	1	NA
GM19102	1	NM_000018.3	ACADVL	6_7_8	7->8->6	0.0227882037533512	3	0.0969929692232743	1	1	NA
GM19209	1	NM_000018.3	ACADVL	6_7_8	7->6->8	0.967390317013353	1	0.038190206227521	1	1	NA
GM19209	2	NM_000018.3	ACADVL	6_7_8	7->6->8	0.944444444444444	1	0.038190206227521	1	1	NA
GM19209	1	NM_000018.3	ACADVL	6_7_8	6->7->8	0.025797075120356	2	0.038190206227521	1	1	NA
GM19209	2	NM_000018.3	ACADVL	6_7_8	6->7->8	0.0555555555555555	2	0.038190206227521	1	1	NA
GM19209	1	NM_000018.3	ACADVL	6_7_8	7->8->6	0.0068126078662912	3	0.038190206227521	1	1	NA
GM19152	1	NM_000018.3	ACADVL	6_7_8	7->6->8	0.888723179062831	1	0.0163736496767212	1	1	NA
GM19152	2	NM_000018.3	ACADVL	6_7_8	7->6->8	0.899061419397332	1	0.0163736496767212	1	1	NA
GM19152	1	NM_000018.3	ACADVL	6_7_8	6->7->8	0.108823246415857	2	0.0163736496767212	1	1	NA
GM19152	2	NM_000018.3	ACADVL	6_7_8	6->7->8	0.0963280092211427	2	0.0163736496767212	1	1	NA
GM19152	1	NM_000018.3	ACADVL	6_7_8	7->8->6	0.0023573559126335	3	0.0163736496767212	1	1	NA
GM19152	2	NM_000018.3	ACADVL	6_7_8	7->8->6	0.0046105713815247	3	0.0163736496767212	1	1	NA
GM19152	1	NM_000018.3	ACADVL	6_7_8	8->7->6	9.62186086789185e-05	4	0.0163736496767212	1	1	NA
GM19099	1	NM_000018.3	ACADVL	7_8_9	7->9->8	1	1	0.353553390593274	1	1	NA
GM19099	2	NM_000018.3	ACADVL	7_8_9	7->9->8	0.75	1	0.353553390593274	1	1	NA
GM19099	2	NM_000018.3	ACADVL	7_8_9	7->8->9	0.25	2	0.353553390593274	1	1	NA
GM19223	1	NM_000018.3	ACADVL	7_8_9	7->9->8	0.818181818181818	1	0.11570838237598	1	1	NA
GM19223	2	NM_000018.3	ACADVL	7_8_9	7->9->8	0.9	1	0.11570838237598	1	1	NA
GM19223	1	NM_000018.3	ACADVL	7_8_9	7->8->9	0.181818181818182	2	0.11570838237598	1	1	NA
GM19223	2	NM_000018.3	ACADVL	7_8_9	7->8->9	0.1	2	0.11570838237598	1	1	NA
GM19152	1	NM_000018.3	ACADVL	7_8_9	7->9->8	0.931095258078053	1	0.0941782818372762	1	0.537873538064575	NA
GM19152	2	NM_000018.3	ACADVL	7_8_9	7->9->8	0.868869385647909	1	0.0941782818372762	1	0.537873538064575	NA
GM19152	1	NM_000018.3	ACADVL	7_8_9	7->8->9	0.0433067561896768	2	0.0941782818372762	1	0.537873538064575	NA
GM19152	2	NM_000018.3	ACADVL	7_8_9	7->8->9	0.113577697470315	2	0.0941782818372762	1	0.537873538064575	NA
GM19152	1	NM_000018.3	ACADVL	7_8_9	9->7->8	0.0252622744439781	3	0.0941782818372762	1	0.537873538064575	NA
GM19152	2	NM_000018.3	ACADVL	7_8_9	9->7->8	0.0175529168817759	3	0.0941782818372762	1	0.537873538064575	NA
GM19152	1	NM_000018.3	ACADVL	7_8_9	8->7->9	0.000167855644146	4	0.0941782818372762	1	0.537873538064575	NA
GM19152	1	NM_000018.3	ACADVL	7_8_9	9->8->7	0.0001468736886277	5	0.0941782818372762	1	0.537873538064575	NA
GM19152	1	NM_000018.3	ACADVL	7_8_9	8->9->7	2.09819555182543e-05	6	0.0941782818372762	1	0.537873538064575	NA
GM19223	1	NM_000018.3	ACADVL	8_9_10	9->8->10	0.774647887323944	1	0.0755611008448337	1	1	NA
GM19223	2	NM_000018.3	ACADVL	8_9_10	9->8->10	0.821256038647343	1	0.0755611008448337	1	1	NA
GM19223	1	NM_000018.3	ACADVL	8_9_10	8->9->10	0.154929577464789	2	0.0755611008448337	1	1	NA
GM19223	2	NM_000018.3	ACADVL	8_9_10	8->9->10	0.0966183574879226	2	0.0755611008448337	1	1	NA
GM19223	1	NM_000018.3	ACADVL	8_9_10	9->10->8	0.0704225352112676	3	0.0755611008448337	1	1	NA
GM19223	2	NM_000018.3	ACADVL	8_9_10	9->10->8	0.0821256038647343	3	0.0755611008448337	1	1	NA
GM19152	1	NM_000018.3	ACADVL	8_9_10	9->8->10	0.812153984807519	1	0.074946740881515	0.60350014080465	1	NA
GM19152	2	NM_000018.3	ACADVL	8_9_10	9->8->10	0.765765765765766	1	0.074946740881515	0.60350014080465	1	NA
GM19152	1	NM_000018.3	ACADVL	8_9_10	9->10->8	0.138921076348654	2	0.074946740881515	0.60350014080465	1	NA
GM19152	2	NM_000018.3	ACADVL	8_9_10	9->10->8	0.126126126126126	2	0.074946740881515	0.60350014080465	1	NA
GM19152	1	NM_000018.3	ACADVL	8_9_10	8->9->10	0.0489249388438264	3	0.074946740881515	0.60350014080465	1	NA
GM19152	2	NM_000018.3	ACADVL	8_9_10	8->9->10	0.106356356356356	3	0.074946740881515	0.60350014080465	1	NA
GM19152	2	NM_000018.3	ACADVL	8_9_10	10->9->8	0.0017517517517517	4	0.074946740881515	0.60350014080465	1	NA
GM18870	1	NM_000018.3	ACADVL	9_10_11	11->9->10	1	1	0.0471404520791031	1	1	NA
GM18870	2	NM_000018.3	ACADVL	9_10_11	11->9->10	0.966666666666667	1	0.0471404520791031	1	1	NA
GM18870	2	NM_000018.3	ACADVL	9_10_11	9->11->10	0.0333333333333333	2	0.0471404520791031	1	1	NA
GM19099	1	NM_000018.3	ACADVL	9_10_11	11->9->10	1	1	0.0942809041582064	1	1	NA
GM19099	2	NM_000018.3	ACADVL	9_10_11	11->9->10	0.933333333333333	1	0.0942809041582064	1	1	NA
GM19099	2	NM_000018.3	ACADVL	9_10_11	11->10->9	0.0666666666666666	2	0.0942809041582064	1	1	NA
GM19223	1	NM_000018.3	ACADVL	9_10_11	11->9->10	1	1	0	1	1	NA
GM19223	2	NM_000018.3	ACADVL	9_10_11	11->9->10	1	1	0	1	1	NA
GM19152	1	NM_000018.3	ACADVL	9_10_11	11->9->10	0.980694980694981	1	0.0110235340325071	1	1	NA
GM19152	2	NM_000018.3	ACADVL	9_10_11	11->9->10	0.978055731943234	1	0.0110235340325071	1	1	NA
GM19152	1	NM_000018.3	ACADVL	9_10_11	9->11->10	0.0193050193050193	2	0.0110235340325071	1	1	NA
GM19152	2	NM_000018.3	ACADVL	9_10_11	9->11->10	0.0131724677702792	2	0.0110235340325071	1	1	NA
GM19152	2	NM_000018.3	ACADVL	9_10_11	11->10->9	0.0087718002864864	3	0.0110235340325071	1	1	NA
GM19152	1	NM_014716.3	ACAP1	13_14_15	13->15->14	0.357142857142857	1	0.364466213552266	1	0.913700122086754	NA
GM19152	2	NM_014716.3	ACAP1	13_14_15	13->15->14	0.632530120481928	1	0.364466213552266	1	0.913700122086754	NA
GM19152	1	NM_014716.3	ACAP1	13_14_15	13->14->15	0.357142857142857	2	0.364466213552266	1	0.913700122086754	NA
GM19152	2	NM_014716.3	ACAP1	13_14_15	15->13->14	0.225903614457831	2	0.364466213552266	1	0.913700122086754	NA
GM19152	1	NM_014716.3	ACAP1	13_14_15	15->13->14	0.285714285714286	3	0.364466213552266	1	0.913700122086754	NA
GM19152	2	NM_014716.3	ACAP1	13_14_15	13->14->15	0.126506024096386	3	0.364466213552266	1	0.913700122086754	NA
GM19152	2	NM_014716.3	ACAP1	13_14_15	15->14->13	0.0150602409638554	4	0.364466213552266	1	0.913700122086754	NA
GM19152	1	NM_014716.3	ACAP1	14_15_16	15->14->16	0.549773755656109	1	0.312237278517056	0.71288844288706	1	NA
GM19152	2	NM_014716.3	ACAP1	14_15_16	15->14->16	0.714285714285714	1	0.312237278517056	0.71288844288706	1	NA
GM19152	1	NM_014716.3	ACAP1	14_15_16	14->15->16	0.305429864253394	2	0.312237278517056	0.71288844288706	1	NA
GM19152	2	NM_014716.3	ACAP1	14_15_16	15->16->14	0.153061224489796	2	0.312237278517056	0.71288844288706	1	NA
GM19152	1	NM_014716.3	ACAP1	14_15_16	15->16->14	0.111990950226244	3	0.312237278517056	0.71288844288706	1	NA
GM19152	2	NM_014716.3	ACAP1	14_15_16	16->15->14	0.0714285714285714	3	0.312237278517056	0.71288844288706	1	NA
GM19152	1	NM_014716.3	ACAP1	14_15_16	16->15->14	0.0248868778280542	4	0.312237278517056	0.71288844288706	1	NA
GM19152	2	NM_014716.3	ACAP1	14_15_16	14->15->16	0.0476190476190476	4	0.312237278517056	0.71288844288706	1	NA
GM19152	1	NM_014716.3	ACAP1	14_15_16	14->16->15	0.005656108597285	5	0.312237278517056	0.71288844288706	1	NA
GM19152	2	NM_014716.3	ACAP1	14_15_16	16->14->15	0.0119047619047619	5	0.312237278517056	0.71288844288706	1	NA
GM19152	1	NM_014716.3	ACAP1	14_15_16	16->14->15	0.002262443438914	6	0.312237278517056	0.71288844288706	1	NA
GM19152	2	NM_014716.3	ACAP1	14_15_16	14->16->15	0.0017006802721088	6	0.312237278517056	0.71288844288706	1	NA
GM18510	1	NM_014716.3	ACAP1	15_16_17	15->16->17	0.769736842105263	1	0.165130892097542	1	1	NA
GM18510	2	NM_014716.3	ACAP1	15_16_17	15->16->17	0.658536585365854	1	0.165130892097542	1	1	NA
GM18510	1	NM_014716.3	ACAP1	15_16_17	15->17->16	0.171052631578947	2	0.165130892097542	1	1	NA
GM18510	2	NM_014716.3	ACAP1	15_16_17	15->17->16	0.292682926829268	2	0.165130892097542	1	1	NA
GM18510	1	NM_014716.3	ACAP1	15_16_17	16->15->17	0.0592105263157894	3	0.165130892097542	1	1	NA
GM18510	2	NM_014716.3	ACAP1	15_16_17	16->15->17	0.048780487804878	3	0.165130892097542	1	1	NA
GM19152	1	NM_014716.3	ACAP1	15_16_17	15->17->16	0.602224123182207	1	0.198823657450217	0.631367477226452	1	NA
GM19152	2	NM_014716.3	ACAP1	15_16_17	15->17->16	0.709200805910007	1	0.198823657450217	0.631367477226452	1	NA
GM19152	1	NM_014716.3	ACAP1	15_16_17	17->15->16	0.225834046193328	2	0.198823657450217	0.631367477226452	1	NA
GM19152	2	NM_014716.3	ACAP1	15_16_17	15->16->17	0.16252518468771	2	0.198823657450217	0.631367477226452	1	NA
GM19152	1	NM_014716.3	ACAP1	15_16_17	15->16->17	0.150556030795552	3	0.198823657450217	0.631367477226452	1	NA
GM19152	2	NM_014716.3	ACAP1	15_16_17	17->15->16	0.0644728005372733	3	0.198823657450217	0.631367477226452	1	NA
GM19152	1	NM_014716.3	ACAP1	15_16_17	17->16->15	0.0102651839178785	4	0.198823657450217	0.631367477226452	1	NA
GM19152	2	NM_014716.3	ACAP1	15_16_17	16->15->17	0.0517125587642713	4	0.198823657450217	0.631367477226452	1	NA
GM19152	1	NM_014716.3	ACAP1	15_16_17	16->15->17	0.0094097519247219	5	0.198823657450217	0.631367477226452	1	NA
GM19152	2	NM_014716.3	ACAP1	15_16_17	16->17->15	0.0094022834116856	5	0.198823657450217	0.631367477226452	1	NA
GM19152	1	NM_014716.3	ACAP1	15_16_17	16->17->15	0.001710863986313	6	0.198823657450217	0.631367477226452	1	NA
GM19152	2	NM_014716.3	ACAP1	15_16_17	17->16->15	0.002686366689053	6	0.198823657450217	0.631367477226452	1	NA
GM19152	1	NM_014716.3	ACAP1	16_17_18	18->17->16	0.820210787352759	1	0.0839552397698724	1	1	NA
GM19152	2	NM_014716.3	ACAP1	16_17_18	18->17->16	0.755905511811024	1	0.0839552397698724	1	1	NA
GM19152	1	NM_014716.3	ACAP1	16_17_18	18->16->17	0.167389956602604	2	0.0839552397698724	1	1	NA
GM19152	2	NM_014716.3	ACAP1	16_17_18	18->16->17	0.220472440944882	2	0.0839552397698724	1	1	NA
GM19152	1	NM_014716.3	ACAP1	16_17_18	16->18->17	0.0123992560446373	3	0.0839552397698724	1	1	NA
GM19152	2	NM_014716.3	ACAP1	16_17_18	16->18->17	0.0220472440944881	3	0.0839552397698724	1	1	NA
GM19152	2	NM_014716.3	ACAP1	16_17_18	16->17->18	0.0015748031496062	4	0.0839552397698724	1	1	NA
GM18510	1	NM_014716.3	ACAP1	17_18_19	19->18->17	0.6	1	0.088320176147578	1	1	NA
GM18510	2	NM_014716.3	ACAP1	17_18_19	19->18->17	0.533333333333333	1	0.088320176147578	1	1	NA
GM18510	1	NM_014716.3	ACAP1	17_18_19	18->19->17	0.4	2	0.088320176147578	1	1	NA
GM18510	2	NM_014716.3	ACAP1	17_18_19	18->19->17	0.457142857142857	2	0.088320176147578	1	1	NA
GM18510	2	NM_014716.3	ACAP1	17_18_19	18->17->19	0.0095238095238095	3	0.088320176147578	1	1	NA
GM18501	1	NM_014716.3	ACAP1	19_20_21	20->19->21	0.909090909090909	1	0	1	1	NA
GM18501	2	NM_014716.3	ACAP1	19_20_21	20->19->21	0.909090909090909	1	0	1	1	NA
GM18501	1	NM_014716.3	ACAP1	19_20_21	19->20->21	0.0909090909090909	2	0	1	1	NA
GM18501	2	NM_014716.3	ACAP1	19_20_21	19->20->21	0.0909090909090909	2	0	1	1	NA
GM18510	1	NM_014716.3	ACAP1	3_4_5	4->3->5	0.714285714285714	1	0.19192898346492	1	1	NA
GM18510	2	NM_014716.3	ACAP1	3_4_5	4->3->5	0.85	1	0.19192898346492	1	1	NA
GM18510	1	NM_014716.3	ACAP1	3_4_5	4->5->3	0.285714285714286	2	0.19192898346492	1	1	NA
GM18510	2	NM_014716.3	ACAP1	3_4_5	4->5->3	0.15	2	0.19192898346492	1	1	NA
GM19152	1	NM_030649.2	ACAP3	20_19_18	18->20->19	0.956521739130435	1	0.0269008014581839	1	1	NA
GM19152	2	NM_030649.2	ACAP3	20_19_18	18->20->19	0.9375	1	0.0269008014581839	1	1	NA
GM19152	1	NM_030649.2	ACAP3	20_19_18	20->18->19	0.0434782608695652	2	0.0269008014581839	1	1	NA
GM19152	2	NM_030649.2	ACAP3	20_19_18	20->18->19	0.0625	2	0.0269008014581839	1	1	NA
GM19152	1	NM_030649.2	ACAP3	21_20_19	21->20->19	1	1	0	1	1	NA
GM19152	2	NM_030649.2	ACAP3	21_20_19	21->20->19	1	1	0	1	1	NA
GM18501	1	NM_001127219.1	ACCS	8_9_10	10->9->8	1	1	0	1	1	NA
GM18501	2	NM_001127219.1	ACCS	8_9_10	10->9->8	1	1	0	1	1	NA
GM18853	1	NM_001127219.1	ACCS	8_9_10	10->9->8	1	1	0	1	1	NA
GM18853	2	NM_001127219.1	ACCS	8_9_10	10->9->8	1	1	0	1	1	NA
GM19209	1	NM_001127219.1	ACCS	8_9_10	10->9->8	1	1	0	1	1	NA
GM19209	2	NM_001127219.1	ACCS	8_9_10	10->9->8	1	1	0	1	1	NA
GM18501	1	NM_007099.3	ACP1	3_4_5	5->4->3	1	1	0	1	1	NA
GM18501	2	NM_007099.3	ACP1	3_4_5	5->4->3	1	1	0	1	1	NA
GM18853	1	NM_007099.3	ACP1	3_4_5	5->4->3	1	1	0	1	1	NA
GM18853	2	NM_007099.3	ACP1	3_4_5	5->4->3	1	1	0	1	1	NA
GM18861	1	NM_007099.3	ACP1	3_4_5	5->4->3	1	1	0	1	1	NA
GM18861	2	NM_007099.3	ACP1	3_4_5	5->4->3	1	1	0	1	1	NA
GM19152	1	NM_007099.3	ACP1	3_4_5	5->4->3	1	1	0	1	1	NA
GM19152	2	NM_007099.3	ACP1	3_4_5	5->4->3	1	1	0	1	1	NA
GM18853	1	NM_004300.3	ACP1	3_4_5	5->4->3	0.941176470588235	1	0.0831890330807704	1	1	NA
GM18853	2	NM_004300.3	ACP1	3_4_5	5->4->3	1	1	0.0831890330807704	1	1	NA
GM18853	1	NM_004300.3	ACP1	3_4_5	5->3->4	0.0588235294117647	2	0.0831890330807704	1	1	NA
GM18861	1	NM_004300.3	ACP1	3_4_5	5->4->3	1	1	0.132533152155962	1	1	NA
GM18861	2	NM_004300.3	ACP1	3_4_5	5->4->3	0.903225806451613	1	0.132533152155962	1	1	NA
GM18861	2	NM_004300.3	ACP1	3_4_5	5->3->4	0.0903225806451612	2	0.132533152155962	1	1	NA
GM18861	2	NM_004300.3	ACP1	3_4_5	3->5->4	0.0064516129032258	3	0.132533152155962	1	1	NA
GM19152	1	NM_004300.3	ACP1	3_4_5	5->4->3	0.96	1	0.00942809041582077	1	1	NA
GM19152	2	NM_004300.3	ACP1	3_4_5	5->4->3	0.966666666666667	1	0.00942809041582077	1	1	NA
GM19152	1	NM_004300.3	ACP1	3_4_5	5->3->4	0.04	2	0.00942809041582077	1	1	NA
GM19152	2	NM_004300.3	ACP1	3_4_5	5->3->4	0.0333333333333333	2	0.00942809041582077	1	1	NA
GM19152	1	NM_001286708.1	ACSL1	15_14_13	15->14->13	0.789473684210526	1	0.0893379456843414	1	1	NA
GM19152	2	NM_001286708.1	ACSL1	15_14_13	15->14->13	0.718849840255591	1	0.0893379456843414	1	1	NA
GM19152	1	NM_001286708.1	ACSL1	15_14_13	15->13->14	0.210526315789474	2	0.0893379456843414	1	1	NA
GM19152	2	NM_001286708.1	ACSL1	15_14_13	15->13->14	0.230031948881789	2	0.0893379456843414	1	1	NA
GM19152	2	NM_001286708.1	ACSL1	15_14_13	13->15->14	0.0511182108626198	3	0.0893379456843414	1	1	NA
GM19144	1	NM_016234.3	ACSL5	5_6_7	5->6->7	0.68503937007874	1	0.327577778305736	1	1	NA
GM19144	2	NM_016234.3	ACSL5	5_6_7	5->6->7	0.920353982300885	1	0.327577778305736	1	1	NA
GM19144	1	NM_016234.3	ACSL5	5_6_7	6->5->7	0.304461942257218	2	0.327577778305736	1	1	NA
GM19144	2	NM_016234.3	ACSL5	5_6_7	6->5->7	0.0766961651917404	2	0.327577778305736	1	1	NA
GM19144	1	NM_016234.3	ACSL5	5_6_7	6->7->5	0.0104986876640419	3	0.327577778305736	1	1	NA
GM19144	2	NM_016234.3	ACSL5	5_6_7	6->7->5	0.0029498525073746	3	0.327577778305736	1	1	NA
GM19209	1	NM_001252675.1	ACSS1	12_11_10	12->10->11	0.6	1	0.591398398810567	0.858712768443829	1	NA
GM19209	2	NM_001252675.1	ACSS1	12_11_10	10->12->11	0.818181818181818	1	0.591398398810567	0.858712768443829	1	NA
GM19209	1	NM_001252675.1	ACSS1	12_11_10	10->12->11	0.4	2	0.591398398810567	0.858712768443829	1	NA
GM19209	2	NM_001252675.1	ACSS1	12_11_10	12->10->11	0.181818181818182	2	0.591398398810567	0.858712768443829	1	NA
GM19099	1	NM_001101.3	ACTB	3_2_1	2->1->3	0.596770123643704	1	0.306765067462228	1	0.149792157081232	NA
GM19099	2	NM_001101.3	ACTB	3_2_1	2->3->1	0.528832630098453	1	0.306765067462228	1	0.149792157081232	NA
GM19099	1	NM_001101.3	ACTB	3_2_1	2->3->1	0.336361342417361	2	0.306765067462228	1	0.149792157081232	NA
GM19099	2	NM_001101.3	ACTB	3_2_1	2->1->3	0.360056258790436	2	0.306765067462228	1	0.149792157081232	NA
GM19099	1	NM_001101.3	ACTB	3_2_1	3->2->1	0.0391117840020186	3	0.306765067462228	1	0.149792157081232	NA
GM19099	2	NM_001101.3	ACTB	3_2_1	3->2->1	0.0661040787623066	3	0.306765067462228	1	0.149792157081232	NA
GM19099	1	NM_001101.3	ACTB	3_2_1	1->2->3	0.0277567499369164	4	0.306765067462228	1	0.149792157081232	NA
GM19099	2	NM_001101.3	ACTB	3_2_1	1->2->3	0.0450070323488045	4	0.306765067462228	1	0.149792157081232	NA
GM19223	1	NM_001101.3	ACTB	3_2_1	2->1->3	0.600503022189769	1	0.0852088806403265	1	1	NA
GM19223	2	NM_001101.3	ACTB	3_2_1	2->1->3	0.526194467728416	1	0.0852088806403265	1	1	NA
GM19223	1	NM_001101.3	ACTB	3_2_1	2->3->1	0.307127499898584	2	0.0852088806403265	1	1	NA
GM19223	2	NM_001101.3	ACTB	3_2_1	2->3->1	0.33382229673093	2	0.0852088806403265	1	1	NA
GM19223	1	NM_001101.3	ACTB	3_2_1	1->2->3	0.0478276743336984	3	0.0852088806403265	1	1	NA
GM19223	2	NM_001101.3	ACTB	3_2_1	1->2->3	0.0779547359597653	3	0.0852088806403265	1	1	NA
GM19223	1	NM_001101.3	ACTB	3_2_1	3->2->1	0.0326153097237434	4	0.0852088806403265	1	1	NA
GM19223	2	NM_001101.3	ACTB	3_2_1	3->2->1	0.0370913663034367	4	0.0852088806403265	1	1	NA
GM19223	1	NM_001101.3	ACTB	3_2_1	3->1->2	0.0068151393452598	5	0.0852088806403265	1	1	NA
GM19223	2	NM_001101.3	ACTB	3_2_1	1->3->2	0.0142497904442581	5	0.0852088806403265	1	1	NA
GM19223	1	NM_001101.3	ACTB	3_2_1	1->3->2	0.0051113545089448	6	0.0852088806403265	1	1	NA
GM19223	2	NM_001101.3	ACTB	3_2_1	3->1->2	0.0106873428331936	6	0.0852088806403265	1	1	NA
GM19209	1	NM_001101.3	ACTB	3_2_1	2->3->1	0.873186251189343	1	0.0412123695444112	1	1	NA
GM19209	2	NM_001101.3	ACTB	3_2_1	2->3->1	0.904836315337136	1	0.0412123695444112	1	1	NA
GM19209	1	NM_001101.3	ACTB	3_2_1	2->1->3	0.0746313035204567	2	0.0412123695444112	1	1	NA
GM19209	2	NM_001101.3	ACTB	3_2_1	2->1->3	0.0489100710993046	2	0.0412123695444112	1	1	NA
GM19209	1	NM_001101.3	ACTB	3_2_1	3->2->1	0.0521824452901998	3	0.0412123695444112	1	1	NA
GM19209	2	NM_001101.3	ACTB	3_2_1	3->2->1	0.0462536135635596	3	0.0412123695444112	1	1	NA
GM19152	1	NM_001101.3	ACTB	3_2_1	2->3->1	0.811345646437995	1	0.0641673841480229	0.989153784121182	1	NA
GM19152	2	NM_001101.3	ACTB	3_2_1	2->3->1	0.772858517805582	1	0.0641673841480229	0.989153784121182	1	NA
GM19152	1	NM_001101.3	ACTB	3_2_1	2->1->3	0.162269129287599	2	0.0641673841480229	0.989153784121182	1	NA
GM19152	2	NM_001101.3	ACTB	3_2_1	2->1->3	0.210779595765159	2	0.0641673841480229	0.989153784121182	1	NA
GM19152	1	NM_001101.3	ACTB	3_2_1	3->2->1	0.0263852242744063	3	0.0641673841480229	0.989153784121182	1	NA
GM19152	2	NM_001101.3	ACTB	3_2_1	3->2->1	0.0105871029836381	3	0.0641673841480229	0.989153784121182	1	NA
GM19152	2	NM_001101.3	ACTB	3_2_1	1->2->3	0.0057747834456207	4	0.0641673841480229	0.989153784121182	1	NA
GM19099	1	NM_001101.3	ACTB	4_3_2	4->2->3	0.62381562099872	1	0.0887892327946217	1	1	NA
GM19099	2	NM_001101.3	ACTB	4_3_2	4->2->3	0.55310621242485	1	0.0887892327946217	1	1	NA
GM19099	1	NM_001101.3	ACTB	4_3_2	2->4->3	0.334186939820743	2	0.0887892327946217	1	1	NA
GM19099	2	NM_001101.3	ACTB	4_3_2	2->4->3	0.384769539078156	2	0.0887892327946217	1	1	NA
GM19099	1	NM_001101.3	ACTB	4_3_2	4->3->2	0.0286811779769526	3	0.0887892327946217	1	1	NA
GM19099	2	NM_001101.3	ACTB	4_3_2	4->3->2	0.0460921843687374	3	0.0887892327946217	1	1	NA
GM19099	1	NM_001101.3	ACTB	4_3_2	2->3->4	0.0115236875800256	4	0.0887892327946217	1	1	NA
GM19099	2	NM_001101.3	ACTB	4_3_2	2->3->4	0.0160320641282565	4	0.0887892327946217	1	1	NA
GM19099	1	NM_001101.3	ACTB	4_3_2	3->4->2	0.0010243277848911	5	0.0887892327946217	1	1	NA
GM19099	1	NM_001101.3	ACTB	4_3_2	3->2->4	0.0007682458386683	6	0.0887892327946217	1	1	NA
GM19223	1	NM_001101.3	ACTB	4_3_2	4->2->3	0.485117218368601	1	0.0533934216996564	1	0.834703983418105	NA
GM19223	2	NM_001101.3	ACTB	4_3_2	4->2->3	0.466478628769798	1	0.0533934216996564	1	0.834703983418105	NA
GM19223	1	NM_001101.3	ACTB	4_3_2	2->4->3	0.407498463429625	2	0.0533934216996564	1	0.834703983418105	NA
GM19223	2	NM_001101.3	ACTB	4_3_2	2->4->3	0.373182903015839	2	0.0533934216996564	1	0.834703983418105	NA
GM19223	1	NM_001101.3	ACTB	4_3_2	4->3->2	0.0526824128545087	3	0.0533934216996564	1	0.834703983418105	NA
GM19223	2	NM_001101.3	ACTB	4_3_2	4->3->2	0.0786504664786287	3	0.0533934216996564	1	0.834703983418105	NA
GM19223	1	NM_001101.3	ACTB	4_3_2	2->3->4	0.0460971112476951	4	0.0533934216996564	1	0.834703983418105	NA
GM19223	2	NM_001101.3	ACTB	4_3_2	2->3->4	0.071599045346062	4	0.0533934216996564	1	0.834703983418105	NA
GM19223	1	NM_001101.3	ACTB	4_3_2	3->2->4	0.004390201071209	5	0.0533934216996564	1	0.834703983418105	NA
GM19223	2	NM_001101.3	ACTB	4_3_2	3->2->4	0.0053699284009546	5	0.0533934216996564	1	0.834703983418105	NA
GM19223	1	NM_001101.3	ACTB	4_3_2	3->4->2	0.0042145930283606	6	0.0533934216996564	1	0.834703983418105	NA
GM19223	2	NM_001101.3	ACTB	4_3_2	3->4->2	0.0047190279887177	6	0.0533934216996564	1	0.834703983418105	NA
GM19144	1	NM_001101.3	ACTB	4_3_2	4->2->3	0.493687418371789	1	0.172000601102704	1	1	NA
GM19144	2	NM_001101.3	ACTB	4_3_2	2->4->3	0.566985645933014	1	0.172000601102704	1	1	NA
GM19144	1	NM_001101.3	ACTB	4_3_2	2->4->3	0.440792337831955	2	0.172000601102704	1	1	NA
GM19144	2	NM_001101.3	ACTB	4_3_2	4->2->3	0.37799043062201	2	0.172000601102704	1	1	NA
GM19144	1	NM_001101.3	ACTB	4_3_2	2->3->4	0.0326512842838484	3	0.172000601102704	1	1	NA
GM19144	2	NM_001101.3	ACTB	4_3_2	2->3->4	0.0358851674641148	3	0.172000601102704	1	1	NA
GM19144	1	NM_001101.3	ACTB	4_3_2	4->3->2	0.0304745319982585	4	0.172000601102704	1	1	NA
GM19144	2	NM_001101.3	ACTB	4_3_2	4->3->2	0.0143540669856459	4	0.172000601102704	1	1	NA
GM19144	1	NM_001101.3	ACTB	4_3_2	3->2->4	0.0013060513713539	5	0.172000601102704	1	1	NA
GM19144	2	NM_001101.3	ACTB	4_3_2	3->2->4	0.0029904306220095	5	0.172000601102704	1	1	NA
GM19144	1	NM_001101.3	ACTB	4_3_2	3->4->2	0.0010883761427949	6	0.172000601102704	1	1	NA
GM19144	2	NM_001101.3	ACTB	4_3_2	3->4->2	0.0017942583732057	6	0.172000601102704	1	1	NA
GM19209	1	NM_001101.3	ACTB	4_3_2	4->2->3	0.632233589352903	1	0.0866187634113343	1	1	NA
GM19209	2	NM_001101.3	ACTB	4_3_2	4->2->3	0.571817836170842	1	0.0866187634113343	1	1	NA
GM19209	1	NM_001101.3	ACTB	4_3_2	2->4->3	0.322988898908548	2	0.0866187634113343	1	1	NA
GM19209	2	NM_001101.3	ACTB	4_3_2	2->4->3	0.384774618731781	2	0.0866187634113343	1	1	NA
GM19209	1	NM_001101.3	ACTB	4_3_2	4->3->2	0.0343294256662209	3	0.0866187634113343	1	1	NA
GM19209	2	NM_001101.3	ACTB	4_3_2	4->3->2	0.0384225423514004	3	0.0866187634113343	1	1	NA
GM19209	1	NM_001101.3	ACTB	4_3_2	2->3->4	0.0087689293821325	4	0.0866187634113343	1	1	NA
GM19209	2	NM_001101.3	ACTB	4_3_2	2->3->4	0.0045625448861476	4	0.0866187634113343	1	1	NA
GM19209	1	NM_001101.3	ACTB	4_3_2	3->4->2	0.0011194377934637	5	0.0866187634113343	1	1	NA
GM19209	2	NM_001101.3	ACTB	4_3_2	3->4->2	0.0003590891808542	5	0.0866187634113343	1	1	NA
GM19209	1	NM_001101.3	ACTB	4_3_2	3->2->4	0.0005597188967318	6	0.0866187634113343	1	1	NA
GM19209	2	NM_001101.3	ACTB	4_3_2	3->2->4	6.33686789742723e-05	6	0.0866187634113343	1	1	NA
GM19152	1	NM_001101.3	ACTB	4_3_2	2->3->4	0.896871378910776	1	0.384747542055889	1	0.613424709229199	NA
GM19152	2	NM_001101.3	ACTB	4_3_2	2->3->4	0.627906976744186	1	0.384747542055889	1	0.613424709229199	NA
GM19152	1	NM_001101.3	ACTB	4_3_2	2->4->3	0.074739281575898	2	0.384747542055889	1	0.613424709229199	NA
GM19152	2	NM_001101.3	ACTB	4_3_2	2->4->3	0.348837209302325	2	0.384747542055889	1	0.613424709229199	NA
GM19152	1	NM_001101.3	ACTB	4_3_2	3->2->4	0.0278099652375434	3	0.384747542055889	1	0.613424709229199	NA
GM19152	2	NM_001101.3	ACTB	4_3_2	4->2->3	0.0145348837209302	3	0.384747542055889	1	0.613424709229199	NA
GM19152	1	NM_001101.3	ACTB	4_3_2	4->2->3	0.0005793742757821	4	0.384747542055889	1	0.613424709229199	NA
GM19152	2	NM_001101.3	ACTB	4_3_2	3->2->4	0.0087209302325581	4	0.384747542055889	1	0.613424709229199	NA
GM19099	1	NM_001101.3	ACTB	5_4_3	5->4->3	0.866004296455424	1	0.0140280180715279	1	1	NA
GM19099	2	NM_001101.3	ACTB	5_4_3	5->4->3	0.869800196528005	1	0.0140280180715279	1	1	NA
GM19099	1	NM_001101.3	ACTB	5_4_3	4->5->3	0.103920515574651	2	0.0140280180715279	1	1	NA
GM19099	2	NM_001101.3	ACTB	5_4_3	4->5->3	0.111038322961022	2	0.0140280180715279	1	1	NA
GM19099	1	NM_001101.3	ACTB	5_4_3	5->3->4	0.0268528464017185	3	0.0140280180715279	1	1	NA
GM19099	2	NM_001101.3	ACTB	5_4_3	5->3->4	0.0153946937438585	3	0.0140280180715279	1	1	NA
GM19099	1	NM_001101.3	ACTB	5_4_3	4->3->5	0.0032223415682062	4	0.0140280180715279	1	1	NA
GM19099	2	NM_001101.3	ACTB	5_4_3	4->3->5	0.0029479200786112	4	0.0140280180715279	1	1	NA
GM19099	2	NM_001101.3	ACTB	5_4_3	3->4->5	0.0004913200131018	5	0.0140280180715279	1	1	NA
GM19099	2	NM_001101.3	ACTB	5_4_3	3->5->4	0.0003275466754012	6	0.0140280180715279	1	1	NA
GM19223	1	NM_001101.3	ACTB	5_4_3	5->4->3	0.823241162058103	1	0.0422671353731935	1	1	NA
GM19223	2	NM_001101.3	ACTB	5_4_3	5->4->3	0.817443570560778	1	0.0422671353731935	1	1	NA
GM19223	1	NM_001101.3	ACTB	5_4_3	4->5->3	0.0955547777388869	2	0.0422671353731935	1	1	NA
GM19223	2	NM_001101.3	ACTB	5_4_3	5->3->4	0.111196368054223	2	0.0422671353731935	1	1	NA
GM19223	1	NM_001101.3	ACTB	5_4_3	5->3->4	0.0784039201960098	3	0.0422671353731935	1	1	NA
GM19223	2	NM_001101.3	ACTB	5_4_3	4->5->3	0.0695696655796406	3	0.0422671353731935	1	1	NA
GM19223	1	NM_001101.3	ACTB	5_4_3	3->5->4	0.0014000700035001	4	0.0422671353731935	1	1	NA
GM19223	2	NM_001101.3	ACTB	5_4_3	4->3->5	0.0017903958053583	4	0.0422671353731935	1	1	NA
GM19223	1	NM_001101.3	ACTB	5_4_3	4->3->5	0.0012133940030334	5	0.0422671353731935	1	1	NA
GM19223	1	NM_001101.3	ACTB	5_4_3	3->4->5	0.0001866760004666	6	0.0422671353731935	1	1	NA
GM19144	1	NM_001101.3	ACTB	5_4_3	5->4->3	0.865930331350892	1	0.0704348664257764	1	1	NA
GM19144	2	NM_001101.3	ACTB	5_4_3	5->4->3	0.9068255687974	1	0.0704348664257764	1	1	NA
GM19144	1	NM_001101.3	ACTB	5_4_3	4->5->3	0.0883602378929481	2	0.0704348664257764	1	1	NA
GM19144	2	NM_001101.3	ACTB	5_4_3	5->3->4	0.0585048754062838	2	0.0704348664257764	1	1	NA
GM19144	1	NM_001101.3	ACTB	5_4_3	5->3->4	0.0416312659303313	3	0.0704348664257764	1	1	NA
GM19144	2	NM_001101.3	ACTB	5_4_3	4->5->3	0.0335861321776814	3	0.0704348664257764	1	1	NA
GM19144	1	NM_001101.3	ACTB	5_4_3	4->3->5	0.0016992353440951	4	0.0704348664257764	1	1	NA
GM19144	2	NM_001101.3	ACTB	5_4_3	3->5->4	0.0010834236186348	4	0.0704348664257764	1	1	NA
GM19144	1	NM_001101.3	ACTB	5_4_3	3->5->4	0.0016992353440951	5	0.0704348664257764	1	1	NA
GM19144	1	NM_001101.3	ACTB	5_4_3	3->4->5	0.000679694137638	6	0.0704348664257764	1	1	NA
GM19209	1	NM_001101.3	ACTB	5_4_3	5->4->3	0.815360634830665	1	0.066764881876141	1	1	NA
GM19209	2	NM_001101.3	ACTB	5_4_3	5->4->3	0.868158598881051	1	0.066764881876141	1	1	NA
GM19209	1	NM_001101.3	ACTB	5_4_3	4->5->3	0.154739974493411	2	0.066764881876141	1	1	NA
GM19209	2	NM_001101.3	ACTB	5_4_3	4->5->3	0.115057163707127	2	0.066764881876141	1	1	NA
GM19209	1	NM_001101.3	ACTB	5_4_3	5->3->4	0.0194133484483491	3	0.066764881876141	1	1	NA
GM19209	2	NM_001101.3	ACTB	5_4_3	5->3->4	0.0100948674288494	3	0.066764881876141	1	1	NA
GM19209	1	NM_001101.3	ACTB	5_4_3	4->3->5	0.0094738759893924	4	0.066764881876141	1	1	NA
GM19209	2	NM_001101.3	ACTB	5_4_3	4->3->5	0.0066893699829725	4	0.066764881876141	1	1	NA
GM19209	1	NM_001101.3	ACTB	5_4_3	3->4->5	0.0007287596914917	5	0.066764881876141	1	1	NA
GM19209	1	NM_001101.3	ACTB	5_4_3	3->5->4	0.0002834065466912	6	0.066764881876141	1	1	NA
GM18501	1	NM_001199954.1	ACTG1	3_2_1	2->3->1	0.694951209164192	1	0.188386864432563	1	1	NA
GM18501	2	NM_001199954.1	ACTG1	3_2_1	2->3->1	0.833333333333333	1	0.188386864432563	1	1	NA
GM18501	1	NM_001199954.1	ACTG1	3_2_1	3->2->1	0.294017819261773	2	0.188386864432563	1	1	NA
GM18501	2	NM_001199954.1	ACTG1	3_2_1	3->2->1	0.166666666666667	2	0.188386864432563	1	1	NA
GM18501	1	NM_001199954.1	ACTG1	3_2_1	2->1->3	0.0110309715740347	3	0.188386864432563	1	1	NA
GM18510	1	NM_001199954.1	ACTG1	3_2_1	2->3->1	0.732888732888733	1	0.0150526951099934	1	1	NA
GM18510	2	NM_001199954.1	ACTG1	3_2_1	2->3->1	0.741935483870968	1	0.0150526951099934	1	1	NA
GM18510	1	NM_001199954.1	ACTG1	3_2_1	3->2->1	0.252720252720253	2	0.0150526951099934	1	1	NA
GM18510	2	NM_001199954.1	ACTG1	3_2_1	3->2->1	0.258064516129032	2	0.0150526951099934	1	1	NA
GM18510	1	NM_001199954.1	ACTG1	3_2_1	2->1->3	0.0101790101790101	3	0.0150526951099934	1	1	NA
GM18510	1	NM_001199954.1	ACTG1	3_2_1	3->1->2	0.0035100035100035	4	0.0150526951099934	1	1	NA
GM18510	1	NM_001199954.1	ACTG1	3_2_1	1->3->2	0.0003510003510003	5	0.0150526951099934	1	1	NA
GM18510	1	NM_001199954.1	ACTG1	3_2_1	1->2->3	0.0003510003510003	6	0.0150526951099934	1	1	NA
GM18853	1	NM_001199954.1	ACTG1	3_2_1	2->3->1	0.875	1	0.353553390593274	0.657317071107727	1	NA
GM18853	2	NM_001199954.1	ACTG1	3_2_1	2->3->1	0.625	1	0.353553390593274	0.657317071107727	1	NA
GM18853	1	NM_001199954.1	ACTG1	3_2_1	3->2->1	0.125	2	0.353553390593274	0.657317071107727	1	NA
GM18853	2	NM_001199954.1	ACTG1	3_2_1	3->2->1	0.375	2	0.353553390593274	0.657317071107727	1	NA
GM18870	1	NM_001199954.1	ACTG1	3_2_1	2->3->1	0.857933579335793	1	0.107009797676619	1	1	NA
GM18870	2	NM_001199954.1	ACTG1	3_2_1	2->3->1	0.8	1	0.107009797676619	1	1	NA
GM18870	1	NM_001199954.1	ACTG1	3_2_1	3->2->1	0.114391143911439	2	0.107009797676619	1	1	NA
GM18870	2	NM_001199954.1	ACTG1	3_2_1	3->2->1	0.2	2	0.107009797676619	1	1	NA
GM18870	1	NM_001199954.1	ACTG1	3_2_1	2->1->3	0.0276752767527675	3	0.107009797676619	1	1	NA
GM19209	1	NM_001199954.1	ACTG1	3_2_1	2->3->1	0.891053391053391	1	0.17812705798257	1	1	NA
GM19209	2	NM_001199954.1	ACTG1	3_2_1	2->3->1	0.763636363636364	1	0.17812705798257	1	1	NA
GM19209	1	NM_001199954.1	ACTG1	3_2_1	3->2->1	0.0937950937950938	2	0.17812705798257	1	1	NA
GM19209	2	NM_001199954.1	ACTG1	3_2_1	3->2->1	0.218181818181818	2	0.17812705798257	1	1	NA
GM19209	1	NM_001199954.1	ACTG1	3_2_1	2->1->3	0.0137085137085137	3	0.17812705798257	1	1	NA
GM19209	2	NM_001199954.1	ACTG1	3_2_1	2->1->3	0.0181818181818181	3	0.17812705798257	1	1	NA
GM19209	1	NM_001199954.1	ACTG1	3_2_1	3->1->2	0.0014430014430014	4	0.17812705798257	1	1	NA
GM19152	1	NM_001199954.1	ACTG1	3_2_1	2->3->1	0.750922393846539	1	0.0540661366187933	1	1	NA
GM19152	2	NM_001199954.1	ACTG1	3_2_1	2->3->1	0.719512195121951	1	0.0540661366187933	1	1	NA
GM19152	1	NM_001199954.1	ACTG1	3_2_1	3->2->1	0.237633668938778	2	0.0540661366187933	1	1	NA
GM19152	2	NM_001199954.1	ACTG1	3_2_1	3->2->1	0.280487804878049	2	0.0540661366187933	1	1	NA
GM19152	1	NM_001199954.1	ACTG1	3_2_1	2->1->3	0.0098805578137702	3	0.0540661366187933	1	1	NA
GM19152	1	NM_001199954.1	ACTG1	3_2_1	3->1->2	0.001563379400913	4	0.0540661366187933	1	1	NA
GM18501	1	NM_001614.3	ACTG1	3_2_1	1->2->3	0.406856281785647	1	0.0887572195475178	1	1	NA
GM18501	2	NM_001614.3	ACTG1	3_2_1	1->2->3	0.370555208983157	1	0.0887572195475178	1	1	NA
GM18501	1	NM_001614.3	ACTG1	3_2_1	2->1->3	0.26445658316067	2	0.0887572195475178	1	1	NA
GM18501	2	NM_001614.3	ACTG1	3_2_1	2->1->3	0.33686837180287	2	0.0887572195475178	1	1	NA
GM18501	1	NM_001614.3	ACTG1	3_2_1	2->3->1	0.15671501224336	3	0.0887572195475178	1	1	NA
GM18501	2	NM_001614.3	ACTG1	3_2_1	2->3->1	0.155957579538366	3	0.0887572195475178	1	1	NA
GM18501	1	NM_001614.3	ACTG1	3_2_1	1->3->2	0.082878131474854	4	0.0887572195475178	1	1	NA
GM18501	2	NM_001614.3	ACTG1	3_2_1	1->3->2	0.089207735495945	4	0.0887572195475178	1	1	NA
GM18501	1	NM_001614.3	ACTG1	3_2_1	3->2->1	0.0663025051798832	5	0.0887572195475178	1	1	NA
GM18501	2	NM_001614.3	ACTG1	3_2_1	3->2->1	0.0311915159076731	5	0.0887572195475178	1	1	NA
GM18501	1	NM_001614.3	ACTG1	3_2_1	3->1->2	0.0227914861555848	6	0.0887572195475178	1	1	NA
GM18501	2	NM_001614.3	ACTG1	3_2_1	3->1->2	0.01621958827199	6	0.0887572195475178	1	1	NA
GM18510	1	NM_001614.3	ACTG1	3_2_1	1->2->3	0.365168539325843	1	0.240049152174264	1	0.00382709508200367	NA
GM18510	2	NM_001614.3	ACTG1	3_2_1	1->2->3	0.542668269230769	1	0.240049152174264	1	0.00382709508200367	NA
GM18510	1	NM_001614.3	ACTG1	3_2_1	2->1->3	0.302568218298555	2	0.240049152174264	1	0.00382709508200367	NA
GM18510	2	NM_001614.3	ACTG1	3_2_1	2->1->3	0.290264423076923	2	0.240049152174264	1	0.00382709508200367	NA
GM18510	1	NM_001614.3	ACTG1	3_2_1	2->3->1	0.239394634258198	3	0.240049152174264	1	0.00382709508200367	NA
GM18510	2	NM_001614.3	ACTG1	3_2_1	2->3->1	0.08984375	3	0.240049152174264	1	0.00382709508200367	NA
GM18510	1	NM_001614.3	ACTG1	3_2_1	3->2->1	0.0825498738821371	4	0.240049152174264	1	0.00382709508200367	NA
GM18510	2	NM_001614.3	ACTG1	3_2_1	1->3->2	0.0387620192307692	4	0.240049152174264	1	0.00382709508200367	NA
GM18510	1	NM_001614.3	ACTG1	3_2_1	1->3->2	0.0080256821829855	5	0.240049152174264	1	0.00382709508200367	NA
GM18510	2	NM_001614.3	ACTG1	3_2_1	3->2->1	0.03125	5	0.240049152174264	1	0.00382709508200367	NA
GM18510	1	NM_001614.3	ACTG1	3_2_1	3->1->2	0.0022930520522815	6	0.240049152174264	1	0.00382709508200367	NA
GM18510	2	NM_001614.3	ACTG1	3_2_1	3->1->2	0.0072115384615384	6	0.240049152174264	1	0.00382709508200367	NA
GM18853	1	NM_001614.3	ACTG1	3_2_1	2->1->3	0.398066533977822	1	0.223515496038794	0.550725506969113	1	NA
GM18853	2	NM_001614.3	ACTG1	3_2_1	1->2->3	0.328638497652582	1	0.223515496038794	0.550725506969113	1	NA
GM18853	1	NM_001614.3	ACTG1	3_2_1	2->3->1	0.278646573784475	2	0.223515496038794	0.550725506969113	1	NA
GM18853	2	NM_001614.3	ACTG1	3_2_1	2->1->3	0.234741784037559	2	0.223515496038794	0.550725506969113	1	NA
GM18853	1	NM_001614.3	ACTG1	3_2_1	1->2->3	0.241683252772249	3	0.223515496038794	0.550725506969113	1	NA
GM18853	2	NM_001614.3	ACTG1	3_2_1	2->3->1	0.199530516431925	3	0.223515496038794	0.550725506969113	1	NA
GM18853	1	NM_001614.3	ACTG1	3_2_1	3->2->1	0.0398066533977822	4	0.223515496038794	0.550725506969113	1	NA
GM18853	2	NM_001614.3	ACTG1	3_2_1	3->2->1	0.119718309859155	4	0.223515496038794	0.550725506969113	1	NA
GM18853	1	NM_001614.3	ACTG1	3_2_1	1->3->2	0.0338356553881148	5	0.223515496038794	0.550725506969113	1	NA
GM18853	2	NM_001614.3	ACTG1	3_2_1	1->3->2	0.0821596244131455	5	0.223515496038794	0.550725506969113	1	NA
GM18853	1	NM_001614.3	ACTG1	3_2_1	3->1->2	0.0079613306795564	6	0.223515496038794	0.550725506969113	1	NA
GM18853	2	NM_001614.3	ACTG1	3_2_1	3->1->2	0.0352112676056338	6	0.223515496038794	0.550725506969113	1	NA
GM18870	1	NM_001614.3	ACTG1	3_2_1	1->2->3	0.34086067319983	1	0.103363093332644	1	1	NA
GM18870	2	NM_001614.3	ACTG1	3_2_1	2->1->3	0.303708063566804	1	0.103363093332644	1	1	NA
GM18870	1	NM_001614.3	ACTG1	3_2_1	2->1->3	0.31955688112484	2	0.103363093332644	1	1	NA
GM18870	2	NM_001614.3	ACTG1	3_2_1	1->2->3	0.253090052972337	2	0.103363093332644	1	1	NA
GM18870	1	NM_001614.3	ACTG1	3_2_1	2->3->1	0.198125266297401	3	0.103363093332644	1	1	NA
GM18870	2	NM_001614.3	ACTG1	3_2_1	2->3->1	0.226015303119482	3	0.103363093332644	1	1	NA
GM18870	1	NM_001614.3	ACTG1	3_2_1	1->3->2	0.102258201959949	4	0.103363093332644	1	1	NA
GM18870	2	NM_001614.3	ACTG1	3_2_1	1->3->2	0.123602118893467	4	0.103363093332644	1	1	NA
GM18870	1	NM_001614.3	ACTG1	3_2_1	3->2->1	0.0264167021729867	5	0.103363093332644	1	1	NA
GM18870	2	NM_001614.3	ACTG1	3_2_1	3->2->1	0.0565038257798705	5	0.103363093332644	1	1	NA
GM18870	1	NM_001614.3	ACTG1	3_2_1	3->1->2	0.0127822752449936	6	0.103363093332644	1	1	NA
GM18870	2	NM_001614.3	ACTG1	3_2_1	3->1->2	0.03708063566804	6	0.103363093332644	1	1	NA
GM19099	1	NM_001614.3	ACTG1	3_2_1	1->2->3	0.425414364640884	1	0.311742116037141	1	1	NA
GM19099	2	NM_001614.3	ACTG1	3_2_1	1->2->3	0.673249551166966	1	0.311742116037141	1	1	NA
GM19099	1	NM_001614.3	ACTG1	3_2_1	2->1->3	0.30939226519337	2	0.311742116037141	1	1	NA
GM19099	2	NM_001614.3	ACTG1	3_2_1	2->1->3	0.179533213644524	2	0.311742116037141	1	1	NA
GM19099	1	NM_001614.3	ACTG1	3_2_1	2->3->1	0.176795580110497	3	0.311742116037141	1	1	NA
GM19099	2	NM_001614.3	ACTG1	3_2_1	2->3->1	0.0718132854578097	3	0.311742116037141	1	1	NA
GM19099	1	NM_001614.3	ACTG1	3_2_1	3->2->1	0.0883977900552486	4	0.311742116037141	1	1	NA
GM19099	2	NM_001614.3	ACTG1	3_2_1	1->3->2	0.0538599640933572	4	0.311742116037141	1	1	NA
GM19099	2	NM_001614.3	ACTG1	3_2_1	3->2->1	0.0179533213644524	5	0.311742116037141	1	1	NA
GM19099	2	NM_001614.3	ACTG1	3_2_1	3->1->2	0.0035906642728904	6	0.311742116037141	1	1	NA
GM19209	1	NM_001614.3	ACTG1	3_2_1	1->2->3	0.4279176201373	1	0.102446250531377	1	0.253157165822436	NA
GM19209	2	NM_001614.3	ACTG1	3_2_1	1->2->3	0.466231900077374	1	0.102446250531377	1	0.253157165822436	NA
GM19209	1	NM_001614.3	ACTG1	3_2_1	2->1->3	0.246376811594203	2	0.102446250531377	1	0.253157165822436	NA
GM19209	2	NM_001614.3	ACTG1	3_2_1	2->1->3	0.257654471095391	2	0.102446250531377	1	0.253157165822436	NA
GM19209	1	NM_001614.3	ACTG1	3_2_1	2->3->1	0.188405797101449	3	0.102446250531377	1	0.253157165822436	NA
GM19209	2	NM_001614.3	ACTG1	3_2_1	1->3->2	0.130208909030618	3	0.102446250531377	1	0.253157165822436	NA
GM19209	1	NM_001614.3	ACTG1	3_2_1	1->3->2	0.110755148741419	4	0.102446250531377	1	0.253157165822436	NA
GM19209	2	NM_001614.3	ACTG1	3_2_1	2->3->1	0.0974908809550127	4	0.102446250531377	1	0.253157165822436	NA
GM19209	1	NM_001614.3	ACTG1	3_2_1	3->2->1	0.0198321891685736	5	0.102446250531377	1	0.253157165822436	NA
GM19209	2	NM_001614.3	ACTG1	3_2_1	3->2->1	0.0278545374157179	5	0.102446250531377	1	0.253157165822436	NA
GM19209	1	NM_001614.3	ACTG1	3_2_1	3->1->2	0.0067124332570556	6	0.102446250531377	1	0.253157165822436	NA
GM19209	2	NM_001614.3	ACTG1	3_2_1	3->1->2	0.020559301425887	6	0.102446250531377	1	0.253157165822436	NA
GM19152	1	NM_001614.3	ACTG1	3_2_1	1->2->3	0.374798836782518	1	0.210067536808962	0.307689877234067	0.0486357463383599	NA
GM19152	2	NM_001614.3	ACTG1	3_2_1	1->2->3	0.537464707159922	1	0.210067536808962	0.307689877234067	0.0486357463383599	NA
GM19152	1	NM_001614.3	ACTG1	3_2_1	2->1->3	0.328990090064655	2	0.210067536808962	0.307689877234067	0.0486357463383599	NA
GM19152	2	NM_001614.3	ACTG1	3_2_1	2->1->3	0.247737638456526	2	0.210067536808962	0.307689877234067	0.0486357463383599	NA
GM19152	1	NM_001614.3	ACTG1	3_2_1	2->3->1	0.169513537931619	3	0.210067536808962	0.307689877234067	0.0486357463383599	NA
GM19152	2	NM_001614.3	ACTG1	3_2_1	1->3->2	0.0945196553970897	3	0.210067536808962	0.307689877234067	0.0486357463383599	NA
GM19152	1	NM_001614.3	ACTG1	3_2_1	1->3->2	0.0571727039159772	4	0.210067536808962	0.307689877234067	0.0486357463383599	NA
GM19152	2	NM_001614.3	ACTG1	3_2_1	2->3->1	0.0743212915369579	4	0.210067536808962	0.307689877234067	0.0486357463383599	NA
GM19152	1	NM_001614.3	ACTG1	3_2_1	3->2->1	0.0536435246619046	5	0.210067536808962	0.307689877234067	0.0486357463383599	NA
GM19152	2	NM_001614.3	ACTG1	3_2_1	3->2->1	0.0289727068703395	5	0.210067536808962	0.307689877234067	0.0486357463383599	NA
GM19152	1	NM_001614.3	ACTG1	3_2_1	3->1->2	0.015881306643327	6	0.210067536808962	0.307689877234067	0.0486357463383599	NA
GM19152	2	NM_001614.3	ACTG1	3_2_1	3->1->2	0.0169840005791645	6	0.210067536808962	0.307689877234067	0.0486357463383599	NA
GM18501	1	NM_001199954.1	ACTG1	4_3_2	2->4->3	0.404966571155683	1	0.0959727809527238	1	0.86390342510901	NA
GM18501	2	NM_001199954.1	ACTG1	4_3_2	2->4->3	0.449535336070888	1	0.0959727809527238	1	0.86390342510901	NA
GM18501	1	NM_001199954.1	ACTG1	4_3_2	4->2->3	0.258728642682797	2	0.0959727809527238	1	0.86390342510901	NA
GM18501	2	NM_001199954.1	ACTG1	4_3_2	4->2->3	0.309055543548736	2	0.0959727809527238	1	0.86390342510901	NA
GM18501	1	NM_001199954.1	ACTG1	4_3_2	2->3->4	0.171919770773639	3	0.0959727809527238	1	0.86390342510901	NA
GM18501	2	NM_001199954.1	ACTG1	4_3_2	2->3->4	0.107196887832289	3	0.0959727809527238	1	0.86390342510901	NA
GM18501	1	NM_001199954.1	ACTG1	4_3_2	3->2->4	0.0716332378223495	4	0.0959727809527238	1	0.86390342510901	NA
GM18501	2	NM_001199954.1	ACTG1	4_3_2	3->2->4	0.0502485411713853	4	0.0959727809527238	1	0.86390342510901	NA
GM18501	1	NM_001199954.1	ACTG1	4_3_2	4->3->2	0.0561392337896635	5	0.0959727809527238	1	0.86390342510901	NA
GM18501	2	NM_001199954.1	ACTG1	4_3_2	4->3->2	0.0499243570347957	5	0.0959727809527238	1	0.86390342510901	NA
GM18501	1	NM_001199954.1	ACTG1	4_3_2	3->4->2	0.0366125437758675	6	0.0959727809527238	1	0.86390342510901	NA
GM18501	2	NM_001199954.1	ACTG1	4_3_2	3->4->2	0.0340393343419062	6	0.0959727809527238	1	0.86390342510901	NA
GM18510	1	NM_001199954.1	ACTG1	4_3_2	2->4->3	0.583372697213037	1	0.044610477934678	1	1	NA
GM18510	2	NM_001199954.1	ACTG1	4_3_2	2->4->3	0.5509890335144	1	0.044610477934678	1	1	NA
GM18510	1	NM_001199954.1	ACTG1	4_3_2	4->2->3	0.329082034325303	2	0.044610477934678	1	1	NA
GM18510	2	NM_001199954.1	ACTG1	4_3_2	4->2->3	0.355847084144717	2	0.044610477934678	1	1	NA
GM18510	1	NM_001199954.1	ACTG1	4_3_2	2->3->4	0.0491261218705715	3	0.044610477934678	1	1	NA
GM18510	2	NM_001199954.1	ACTG1	4_3_2	2->3->4	0.0442759044788357	3	0.044610477934678	1	1	NA
GM18510	1	NM_001199954.1	ACTG1	4_3_2	4->3->2	0.0242481498976539	4	0.044610477934678	1	1	NA
GM18510	2	NM_001199954.1	ACTG1	4_3_2	4->3->2	0.0381264733012196	4	0.044610477934678	1	1	NA
GM18510	1	NM_001199954.1	ACTG1	4_3_2	3->2->4	0.0075578649031648	5	0.044610477934678	1	1	NA
GM18510	2	NM_001199954.1	ACTG1	4_3_2	3->4->2	0.006149431177616	5	0.044610477934678	1	1	NA
GM18510	1	NM_001199954.1	ACTG1	4_3_2	3->4->2	0.0066131317902692	6	0.044610477934678	1	1	NA
GM18510	2	NM_001199954.1	ACTG1	4_3_2	3->2->4	0.004612073383212	6	0.044610477934678	1	1	NA
GM18853	1	NM_001199954.1	ACTG1	4_3_2	2->4->3	0.606904231625835	1	0.290064557217718	0.33834222689764	0.904195589842862	NA
GM18853	2	NM_001199954.1	ACTG1	4_3_2	2->4->3	0.391554702495202	1	0.290064557217718	0.33834222689764	0.904195589842862	NA
GM18853	1	NM_001199954.1	ACTG1	4_3_2	2->3->4	0.228285077951002	2	0.290064557217718	0.33834222689764	0.904195589842862	NA
GM18853	2	NM_001199954.1	ACTG1	4_3_2	4->2->3	0.253358925143954	2	0.290064557217718	0.33834222689764	0.904195589842862	NA
GM18853	1	NM_001199954.1	ACTG1	4_3_2	4->2->3	0.0867006045179764	3	0.290064557217718	0.33834222689764	0.904195589842862	NA
GM18853	2	NM_001199954.1	ACTG1	4_3_2	2->3->4	0.163147792706334	3	0.290064557217718	0.33834222689764	0.904195589842862	NA
GM18853	1	NM_001199954.1	ACTG1	4_3_2	3->2->4	0.0456570155902004	4	0.290064557217718	0.33834222689764	0.904195589842862	NA
GM18853	2	NM_001199954.1	ACTG1	4_3_2	4->3->2	0.0814367973676994	4	0.290064557217718	0.33834222689764	0.904195589842862	NA
GM18853	1	NM_001199954.1	ACTG1	4_3_2	3->4->2	0.0189309576837416	5	0.290064557217718	0.33834222689764	0.904195589842862	NA
GM18853	2	NM_001199954.1	ACTG1	4_3_2	3->2->4	0.0623800383877159	5	0.290064557217718	0.33834222689764	0.904195589842862	NA
GM18853	1	NM_001199954.1	ACTG1	4_3_2	4->3->2	0.013522112631244	6	0.290064557217718	0.33834222689764	0.904195589842862	NA
GM18853	2	NM_001199954.1	ACTG1	4_3_2	3->4->2	0.0481217438990951	6	0.290064557217718	0.33834222689764	0.904195589842862	NA
GM18861	1	NM_001199954.1	ACTG1	4_3_2	2->4->3	0.588235294117647	1	0.0194697736997547	1	1	NA
GM18861	2	NM_001199954.1	ACTG1	4_3_2	2->4->3	0.574468085106383	1	0.0194697736997547	1	1	NA
GM18861	1	NM_001199954.1	ACTG1	4_3_2	4->2->3	0.411764705882353	2	0.0194697736997547	1	1	NA
GM18861	2	NM_001199954.1	ACTG1	4_3_2	4->2->3	0.425531914893617	2	0.0194697736997547	1	1	NA
GM18870	1	NM_001199954.1	ACTG1	4_3_2	2->4->3	0.468085106382979	1	0.10778398300828	1	1	NA
GM18870	2	NM_001199954.1	ACTG1	4_3_2	2->4->3	0.449152542372881	1	0.10778398300828	1	1	NA
GM18870	1	NM_001199954.1	ACTG1	4_3_2	4->2->3	0.276595744680851	2	0.10778398300828	1	1	NA
GM18870	2	NM_001199954.1	ACTG1	4_3_2	4->2->3	0.192493946731235	2	0.10778398300828	1	1	NA
GM18870	1	NM_001199954.1	ACTG1	4_3_2	2->3->4	0.127659574468085	3	0.10778398300828	1	1	NA
GM18870	2	NM_001199954.1	ACTG1	4_3_2	2->3->4	0.186440677966102	3	0.10778398300828	1	1	NA
GM18870	1	NM_001199954.1	ACTG1	4_3_2	4->3->2	0.100580270793037	4	0.10778398300828	1	1	NA
GM18870	2	NM_001199954.1	ACTG1	4_3_2	4->3->2	0.108958837772397	4	0.10778398300828	1	1	NA
GM18870	1	NM_001199954.1	ACTG1	4_3_2	3->4->2	0.0154738878143133	5	0.10778398300828	1	1	NA
GM18870	2	NM_001199954.1	ACTG1	4_3_2	3->4->2	0.036319612590799	5	0.10778398300828	1	1	NA
GM18870	1	NM_001199954.1	ACTG1	4_3_2	3->2->4	0.011605415860735	6	0.10778398300828	1	1	NA
GM18870	2	NM_001199954.1	ACTG1	4_3_2	3->2->4	0.0266343825665859	6	0.10778398300828	1	1	NA
GM19099	1	NM_001199954.1	ACTG1	4_3_2	2->4->3	0.576923076923077	1	0.176468506857123	1	1	NA
GM19099	2	NM_001199954.1	ACTG1	4_3_2	4->2->3	0.45049504950495	1	0.176468506857123	1	1	NA
GM19099	1	NM_001199954.1	ACTG1	4_3_2	4->2->3	0.32967032967033	2	0.176468506857123	1	1	NA
GM19099	2	NM_001199954.1	ACTG1	4_3_2	2->4->3	0.45049504950495	2	0.176468506857123	1	1	NA
GM19099	1	NM_001199954.1	ACTG1	4_3_2	2->3->4	0.0384615384615384	3	0.176468506857123	1	1	NA
GM19099	2	NM_001199954.1	ACTG1	4_3_2	2->3->4	0.0519801980198019	3	0.176468506857123	1	1	NA
GM19099	1	NM_001199954.1	ACTG1	4_3_2	4->3->2	0.0219780219780219	4	0.176468506857123	1	1	NA
GM19099	2	NM_001199954.1	ACTG1	4_3_2	4->3->2	0.0346534653465346	4	0.176468506857123	1	1	NA
GM19099	1	NM_001199954.1	ACTG1	4_3_2	3->4->2	0.0164835164835164	5	0.176468506857123	1	1	NA
GM19099	2	NM_001199954.1	ACTG1	4_3_2	3->2->4	0.0074257425742574	5	0.176468506857123	1	1	NA
GM19099	1	NM_001199954.1	ACTG1	4_3_2	3->2->4	0.0164835164835164	6	0.176468506857123	1	1	NA
GM19099	2	NM_001199954.1	ACTG1	4_3_2	3->4->2	0.0049504950495049	6	0.176468506857123	1	1	NA
GM19102	1	NM_001199954.1	ACTG1	4_3_2	2->4->3	0.61028838659392	1	0.137588774011645	1	0.496389267091292	NA
GM19102	2	NM_001199954.1	ACTG1	4_3_2	2->4->3	0.65528263795424	1	0.137588774011645	1	0.496389267091292	NA
GM19102	1	NM_001199954.1	ACTG1	4_3_2	4->2->3	0.372954014029618	2	0.137588774011645	1	0.496389267091292	NA
GM19102	2	NM_001199954.1	ACTG1	4_3_2	4->2->3	0.255720053835801	2	0.137588774011645	1	0.496389267091292	NA
GM19102	1	NM_001199954.1	ACTG1	4_3_2	4->3->2	0.0085736554949337	3	0.137588774011645	1	0.496389267091292	NA
GM19102	2	NM_001199954.1	ACTG1	4_3_2	2->3->4	0.0620794078061911	3	0.137588774011645	1	0.496389267091292	NA
GM19102	1	NM_001199954.1	ACTG1	4_3_2	2->3->4	0.0070148090413094	4	0.137588774011645	1	0.496389267091292	NA
GM19102	2	NM_001199954.1	ACTG1	4_3_2	4->3->2	0.0188425302826379	4	0.137588774011645	1	0.496389267091292	NA
GM19102	1	NM_001199954.1	ACTG1	4_3_2	3->4->2	0.0007794232268121	5	0.137588774011645	1	0.496389267091292	NA
GM19102	2	NM_001199954.1	ACTG1	4_3_2	3->2->4	0.0045423956931359	5	0.137588774011645	1	0.496389267091292	NA
GM19102	1	NM_001199954.1	ACTG1	4_3_2	3->2->4	0.000389711613406	6	0.137588774011645	1	0.496389267091292	NA
GM19102	2	NM_001199954.1	ACTG1	4_3_2	3->4->2	0.0035329744279946	6	0.137588774011645	1	0.496389267091292	NA
GM19144	1	NM_001199954.1	ACTG1	4_3_2	2->4->3	0.639147802929427	1	0.098585724168227	1	1	NA
GM19144	2	NM_001199954.1	ACTG1	4_3_2	2->4->3	0.714919086677012	1	0.098585724168227	1	1	NA
GM19144	1	NM_001199954.1	ACTG1	4_3_2	4->2->3	0.319573901464714	2	0.098585724168227	1	1	NA
GM19144	2	NM_001199954.1	ACTG1	4_3_2	4->2->3	0.257370871203724	2	0.098585724168227	1	1	NA
GM19144	1	NM_001199954.1	ACTG1	4_3_2	2->3->4	0.0266311584553928	3	0.098585724168227	1	1	NA
GM19144	2	NM_001199954.1	ACTG1	4_3_2	2->3->4	0.0166260252715584	3	0.098585724168227	1	1	NA
GM19144	1	NM_001199954.1	ACTG1	4_3_2	4->3->2	0.0079893475366178	4	0.098585724168227	1	1	NA
GM19144	2	NM_001199954.1	ACTG1	4_3_2	4->3->2	0.007980492130348	4	0.098585724168227	1	1	NA
GM19144	1	NM_001199954.1	ACTG1	4_3_2	3->2->4	0.0041611185086551	5	0.098585724168227	1	1	NA
GM19144	2	NM_001199954.1	ACTG1	4_3_2	3->4->2	0.0017734426956328	5	0.098585724168227	1	1	NA
GM19144	1	NM_001199954.1	ACTG1	4_3_2	3->4->2	0.002496671105193	6	0.098585724168227	1	1	NA
GM19144	2	NM_001199954.1	ACTG1	4_3_2	3->2->4	0.0013300820217246	6	0.098585724168227	1	1	NA
GM19209	1	NM_001199954.1	ACTG1	4_3_2	4->2->3	0.393203883495146	1	0.118155401281677	1	1	NA
GM19209	2	NM_001199954.1	ACTG1	4_3_2	2->4->3	0.434921009195944	1	0.118155401281677	1	1	NA
GM19209	1	NM_001199954.1	ACTG1	4_3_2	2->4->3	0.33495145631068	2	0.118155401281677	1	1	NA
GM19209	2	NM_001199954.1	ACTG1	4_3_2	4->2->3	0.336713039377505	2	0.118155401281677	1	1	NA
GM19209	1	NM_001199954.1	ACTG1	4_3_2	4->3->2	0.114684466019417	3	0.118155401281677	1	1	NA
GM19209	2	NM_001199954.1	ACTG1	4_3_2	4->3->2	0.10469228955435	3	0.118155401281677	1	1	NA
GM19209	1	NM_001199954.1	ACTG1	4_3_2	2->3->4	0.111650485436893	4	0.118155401281677	1	1	NA
GM19209	2	NM_001199954.1	ACTG1	4_3_2	2->3->4	0.0877151615185097	4	0.118155401281677	1	1	NA
GM19209	1	NM_001199954.1	ACTG1	4_3_2	3->2->4	0.0242718446601941	5	0.118155401281677	1	1	NA
GM19209	2	NM_001199954.1	ACTG1	4_3_2	3->4->2	0.0218108936571563	5	0.118155401281677	1	1	NA
GM19209	1	NM_001199954.1	ACTG1	4_3_2	3->4->2	0.0212378640776699	6	0.118155401281677	1	1	NA
GM19209	2	NM_001199954.1	ACTG1	4_3_2	3->2->4	0.0141476066965338	6	0.118155401281677	1	1	NA
GM19152	1	NM_001199954.1	ACTG1	4_3_2	2->4->3	0.518067730339913	1	0.072983972976771	0.957701724040894	1	NA
GM19152	2	NM_001199954.1	ACTG1	4_3_2	2->4->3	0.497974683544304	1	0.072983972976771	0.957701724040894	1	NA
GM19152	1	NM_001199954.1	ACTG1	4_3_2	4->2->3	0.215046982405247	2	0.072983972976771	0.957701724040894	1	NA
GM19152	2	NM_001199954.1	ACTG1	4_3_2	4->2->3	0.270329113924051	2	0.072983972976771	0.957701724040894	1	NA
GM19152	1	NM_001199954.1	ACTG1	4_3_2	2->3->4	0.145393201740556	3	0.072983972976771	0.957701724040894	1	NA
GM19152	2	NM_001199954.1	ACTG1	4_3_2	2->3->4	0.116962025316456	3	0.072983972976771	0.957701724040894	1	NA
GM19152	1	NM_001199954.1	ACTG1	4_3_2	3->2->4	0.0480071892539572	4	0.072983972976771	0.957701724040894	1	NA
GM19152	2	NM_001199954.1	ACTG1	4_3_2	4->3->2	0.0634936708860759	4	0.072983972976771	0.957701724040894	1	NA
GM19152	1	NM_001199954.1	ACTG1	4_3_2	4->3->2	0.0409282966513211	5	0.072983972976771	0.957701724040894	1	NA
GM19152	2	NM_001199954.1	ACTG1	4_3_2	3->4->2	0.0256202531645569	5	0.072983972976771	0.957701724040894	1	NA
GM19152	1	NM_001199954.1	ACTG1	4_3_2	3->4->2	0.0325565996090054	6	0.072983972976771	0.957701724040894	1	NA
GM19152	2	NM_001199954.1	ACTG1	4_3_2	3->2->4	0.0256202531645569	6	0.072983972976771	0.957701724040894	1	NA
GM18501	1	NM_001199954.1	ACTG1	5_4_3	5->4->3	0.604946264405024	1	0.140680215689313	1	0.2482311967337	NA
GM18501	2	NM_001199954.1	ACTG1	5_4_3	5->4->3	0.722267307572258	1	0.140680215689313	1	0.2482311967337	NA
GM18501	1	NM_001199954.1	ACTG1	5_4_3	5->3->4	0.203029910656481	2	0.140680215689313	1	0.2482311967337	NA
GM18501	2	NM_001199954.1	ACTG1	5_4_3	5->3->4	0.158249578625382	2	0.140680215689313	1	0.2482311967337	NA
GM18501	1	NM_001199954.1	ACTG1	5_4_3	4->5->3	0.12287970995727	3	0.140680215689313	1	0.2482311967337	NA
GM18501	2	NM_001199954.1	ACTG1	5_4_3	4->5->3	0.0666708283912853	3	0.140680215689313	1	0.2482311967337	NA
GM18501	1	NM_001199954.1	ACTG1	5_4_3	3->5->4	0.0571021623721351	4	0.140680215689313	1	0.2482311967337	NA
GM18501	2	NM_001199954.1	ACTG1	5_4_3	3->5->4	0.0292153068231475	4	0.140680215689313	1	0.2482311967337	NA
GM18501	1	NM_001199954.1	ACTG1	5_4_3	3->4->5	0.0069921015149553	5	0.140680215689313	1	0.2482311967337	NA
GM18501	2	NM_001199954.1	ACTG1	5_4_3	3->4->5	0.0157313190586178	5	0.140680215689313	1	0.2482311967337	NA
GM18501	1	NM_001199954.1	ACTG1	5_4_3	4->3->5	0.0050498510941344	6	0.140680215689313	1	0.2482311967337	NA
GM18501	2	NM_001199954.1	ACTG1	5_4_3	4->3->5	0.0078656595293089	6	0.140680215689313	1	0.2482311967337	NA
GM18510	1	NM_001199954.1	ACTG1	5_4_3	5->4->3	0.791514930808449	1	0.0565555835868808	1	1	NA
GM18510	2	NM_001199954.1	ACTG1	5_4_3	5->4->3	0.759614708570625	1	0.0565555835868808	1	1	NA
GM18510	1	NM_001199954.1	ACTG1	5_4_3	4->5->3	0.149126001456664	2	0.0565555835868808	1	1	NA
GM18510	2	NM_001199954.1	ACTG1	5_4_3	4->5->3	0.195036208957323	2	0.0565555835868808	1	1	NA
GM18510	1	NM_001199954.1	ACTG1	5_4_3	5->3->4	0.0439730517115804	3	0.0565555835868808	1	1	NA
GM18510	2	NM_001199954.1	ACTG1	5_4_3	5->3->4	0.0364198832876327	3	0.0565555835868808	1	1	NA
GM18510	1	NM_001199954.1	ACTG1	5_4_3	4->3->5	0.007101238164603	4	0.0565555835868808	1	1	NA
GM18510	2	NM_001199954.1	ACTG1	5_4_3	4->3->5	0.0040075933347395	4	0.0565555835868808	1	1	NA
GM18510	1	NM_001199954.1	ACTG1	5_4_3	3->5->4	0.0044610342316096	5	0.0565555835868808	1	1	NA
GM18510	2	NM_001199954.1	ACTG1	5_4_3	3->5->4	0.003445124094776	5	0.0565555835868808	1	1	NA
GM18510	1	NM_001199954.1	ACTG1	5_4_3	3->4->5	0.0038237436270939	6	0.0565555835868808	1	1	NA
GM18510	2	NM_001199954.1	ACTG1	5_4_3	3->4->5	0.001476481754904	6	0.0565555835868808	1	1	NA
GM18853	1	NM_001199954.1	ACTG1	5_4_3	5->4->3	0.417529880478088	1	0.324935633604862	0.0218683233763826	0.0359890143901412	NA
GM18853	2	NM_001199954.1	ACTG1	5_4_3	5->4->3	0.66714924980258	1	0.324935633604862	0.0218683233763826	0.0359890143901412	NA
GM18853	1	NM_001199954.1	ACTG1	5_4_3	4->5->3	0.260956175298805	2	0.324935633604862	0.0218683233763826	0.0359890143901412	NA
GM18853	2	NM_001199954.1	ACTG1	5_4_3	5->3->4	0.19478810213214	2	0.324935633604862	0.0218683233763826	0.0359890143901412	NA
GM18853	1	NM_001199954.1	ACTG1	5_4_3	5->3->4	0.130677290836653	3	0.324935633604862	0.0218683233763826	0.0359890143901412	NA
GM18853	2	NM_001199954.1	ACTG1	5_4_3	4->5->3	0.081139773624638	3	0.324935633604862	0.0218683233763826	0.0359890143901412	NA
GM18853	1	NM_001199954.1	ACTG1	5_4_3	4->3->5	0.0697211155378486	4	0.324935633604862	0.0218683233763826	0.0359890143901412	NA
GM18853	2	NM_001199954.1	ACTG1	5_4_3	3->5->4	0.0421163464069492	4	0.324935633604862	0.0218683233763826	0.0359890143901412	NA
GM18853	1	NM_001199954.1	ACTG1	5_4_3	3->5->4	0.0653386454183267	5	0.324935633604862	0.0218683233763826	0.0359890143901412	NA
GM18853	2	NM_001199954.1	ACTG1	5_4_3	3->4->5	0.0094761779415635	5	0.324935633604862	0.0218683233763826	0.0359890143901412	NA
GM18853	1	NM_001199954.1	ACTG1	5_4_3	3->4->5	0.0557768924302788	6	0.324935633604862	0.0218683233763826	0.0359890143901412	NA
GM18853	2	NM_001199954.1	ACTG1	5_4_3	4->3->5	0.0053303500921295	6	0.324935633604862	0.0218683233763826	0.0359890143901412	NA
GM18861	1	NM_001199954.1	ACTG1	5_4_3	5->4->3	0.851851851851852	1	0.119244169561798	1	1	NA
GM18861	2	NM_001199954.1	ACTG1	5_4_3	5->4->3	0.936170212765958	1	0.119244169561798	1	1	NA
GM18861	1	NM_001199954.1	ACTG1	5_4_3	4->5->3	0.148148148148148	2	0.119244169561798	1	1	NA
GM18861	2	NM_001199954.1	ACTG1	5_4_3	4->5->3	0.0638297872340425	2	0.119244169561798	1	1	NA
GM18870	1	NM_001199954.1	ACTG1	5_4_3	5->4->3	0.678007290400972	1	0.102776130368912	1	1	NA
GM18870	2	NM_001199954.1	ACTG1	5_4_3	5->4->3	0.709254143646409	1	0.102776130368912	1	1	NA
GM18870	1	NM_001199954.1	ACTG1	5_4_3	5->3->4	0.173268529769137	2	0.102776130368912	1	1	NA
GM18870	2	NM_001199954.1	ACTG1	5_4_3	5->3->4	0.233425414364641	2	0.102776130368912	1	1	NA
GM18870	1	NM_001199954.1	ACTG1	5_4_3	4->5->3	0.131227217496962	3	0.102776130368912	1	1	NA
GM18870	2	NM_001199954.1	ACTG1	5_4_3	4->5->3	0.0545580110497237	3	0.102776130368912	1	1	NA
GM18870	1	NM_001199954.1	ACTG1	5_4_3	4->3->5	0.0102065613608748	4	0.102776130368912	1	1	NA
GM18870	2	NM_001199954.1	ACTG1	5_4_3	4->3->5	0.0027624309392265	4	0.102776130368912	1	1	NA
GM18870	1	NM_001199954.1	ACTG1	5_4_3	3->5->4	0.0055893074119076	5	0.102776130368912	1	1	NA
GM18870	1	NM_001199954.1	ACTG1	5_4_3	3->4->5	0.0017010935601458	6	0.102776130368912	1	1	NA
GM19099	1	NM_001199954.1	ACTG1	5_4_3	5->4->3	0.901639344262295	1	0.115115465565031	1	1	NA
GM19099	2	NM_001199954.1	ACTG1	5_4_3	5->4->3	0.837209302325581	1	0.115115465565031	1	1	NA
GM19099	1	NM_001199954.1	ACTG1	5_4_3	5->3->4	0.081967213114754	2	0.115115465565031	1	1	NA
GM19099	2	NM_001199954.1	ACTG1	5_4_3	4->5->3	0.0930232558139535	2	0.115115465565031	1	1	NA
GM19099	1	NM_001199954.1	ACTG1	5_4_3	3->5->4	0.0109289617486338	3	0.115115465565031	1	1	NA
GM19099	2	NM_001199954.1	ACTG1	5_4_3	5->3->4	0.0627906976744186	3	0.115115465565031	1	1	NA
GM19099	1	NM_001199954.1	ACTG1	5_4_3	3->4->5	0.0054644808743169	4	0.115115465565031	1	1	NA
GM19099	2	NM_001199954.1	ACTG1	5_4_3	3->5->4	0.0034883720930232	4	0.115115465565031	1	1	NA
GM19099	2	NM_001199954.1	ACTG1	5_4_3	4->3->5	0.0023255813953488	5	0.115115465565031	1	1	NA
GM19099	2	NM_001199954.1	ACTG1	5_4_3	3->4->5	0.0011627906976744	6	0.115115465565031	1	1	NA
GM19102	1	NM_001199954.1	ACTG1	5_4_3	5->4->3	0.900648772420812	1	0.159069779692527	1	0.547635857369315	NA
GM19102	2	NM_001199954.1	ACTG1	5_4_3	5->4->3	0.770443349753695	1	0.159069779692527	1	0.547635857369315	NA
GM19102	1	NM_001199954.1	ACTG1	5_4_3	4->5->3	0.0915914005851672	2	0.159069779692527	1	0.547635857369315	NA
GM19102	2	NM_001199954.1	ACTG1	5_4_3	4->5->3	0.167487684729064	2	0.159069779692527	1	0.547635857369315	NA
GM19102	1	NM_001199954.1	ACTG1	5_4_3	5->3->4	0.00750540643684	3	0.159069779692527	1	0.547635857369315	NA
GM19102	2	NM_001199954.1	ACTG1	5_4_3	5->3->4	0.0582688247712878	3	0.159069779692527	1	0.547635857369315	NA
GM19102	1	NM_001199954.1	ACTG1	5_4_3	3->5->4	0.000254420557181	4	0.159069779692527	1	0.547635857369315	NA
GM19102	2	NM_001199954.1	ACTG1	5_4_3	3->5->4	0.0038001407459535	4	0.159069779692527	1	0.547635857369315	NA
GM19144	1	NM_001199954.1	ACTG1	5_4_3	5->4->3	0.774363476733977	1	0.0183507612505435	1	1	NA
GM19144	2	NM_001199954.1	ACTG1	5_4_3	5->4->3	0.789996793844181	1	0.0183507612505435	1	1	NA
GM19144	1	NM_001199954.1	ACTG1	5_4_3	4->5->3	0.193590869183494	2	0.0183507612505435	1	1	NA
GM19144	2	NM_001199954.1	ACTG1	5_4_3	4->5->3	0.184674575184354	2	0.0183507612505435	1	1	NA
GM19144	1	NM_001199954.1	ACTG1	5_4_3	5->3->4	0.0263388937664618	3	0.0183507612505435	1	1	NA
GM19144	2	NM_001199954.1	ACTG1	5_4_3	5->3->4	0.0246873998076306	3	0.0183507612505435	1	1	NA
GM19144	1	NM_001199954.1	ACTG1	5_4_3	4->3->5	0.0026338893766461	4	0.0183507612505435	1	1	NA
GM19144	2	NM_001199954.1	ACTG1	5_4_3	3->5->4	0.0006412311638345	4	0.0183507612505435	1	1	NA
GM19144	1	NM_001199954.1	ACTG1	5_4_3	3->5->4	0.0021949078138718	5	0.0183507612505435	1	1	NA
GM19144	1	NM_001199954.1	ACTG1	5_4_3	3->4->5	0.0008779631255487	6	0.0183507612505435	1	1	NA
GM19209	1	NM_001199954.1	ACTG1	5_4_3	5->4->3	0.706940509915014	1	0.0990486255764514	1	1	NA
GM19209	2	NM_001199954.1	ACTG1	5_4_3	5->4->3	0.790497919742316	1	0.0990486255764514	1	1	NA
GM19209	1	NM_001199954.1	ACTG1	5_4_3	5->3->4	0.140509915014164	2	0.0990486255764514	1	1	NA
GM19209	2	NM_001199954.1	ACTG1	5_4_3	5->3->4	0.12897597637901	2	0.0990486255764514	1	1	NA
GM19209	1	NM_001199954.1	ACTG1	5_4_3	4->5->3	0.114022662889518	3	0.0990486255764514	1	1	NA
GM19209	2	NM_001199954.1	ACTG1	5_4_3	4->5->3	0.0637498322372836	3	0.0990486255764514	1	1	NA
GM19209	1	NM_001199954.1	ACTG1	5_4_3	3->5->4	0.0181303116147308	4	0.0990486255764514	1	1	NA
GM19209	2	NM_001199954.1	ACTG1	5_4_3	3->5->4	0.0083210307341296	4	0.0990486255764514	1	1	NA
GM19209	1	NM_001199954.1	ACTG1	5_4_3	4->3->5	0.0113314447592068	5	0.0990486255764514	1	1	NA
GM19209	2	NM_001199954.1	ACTG1	5_4_3	4->3->5	0.0046973560595893	5	0.0990486255764514	1	1	NA
GM19209	1	NM_001199954.1	ACTG1	5_4_3	3->4->5	0.0090651558073654	6	0.0990486255764514	1	1	NA
GM19209	2	NM_001199954.1	ACTG1	5_4_3	3->4->5	0.0037578848476714	6	0.0990486255764514	1	1	NA
GM19152	1	NM_001199954.1	ACTG1	5_4_3	5->4->3	0.499489322191272	1	0.288223221558964	1.15245250925901e-05	0.239804086090496	NA
GM19152	2	NM_001199954.1	ACTG1	5_4_3	5->4->3	0.725835350328482	1	0.288223221558964	1.15245250925901e-05	0.239804086090496	NA
GM19152	1	NM_001199954.1	ACTG1	5_4_3	4->5->3	0.262662488393686	2	0.288223221558964	1.15245250925901e-05	0.239804086090496	NA
GM19152	2	NM_001199954.1	ACTG1	5_4_3	5->3->4	0.146292396190237	2	0.288223221558964	1.15245250925901e-05	0.239804086090496	NA
GM19152	1	NM_001199954.1	ACTG1	5_4_3	5->3->4	0.133286908077994	3	0.288223221558964	1.15245250925901e-05	0.239804086090496	NA
GM19152	2	NM_001199954.1	ACTG1	5_4_3	4->5->3	0.0892088140068525	3	0.288223221558964	1.15245250925901e-05	0.239804086090496	NA
GM19152	1	NM_001199954.1	ACTG1	5_4_3	3->5->4	0.0436629526462395	4	0.288223221558964	1.15245250925901e-05	0.239804086090496	NA
GM19152	2	NM_001199954.1	ACTG1	5_4_3	3->5->4	0.023701002734731	4	0.288223221558964	1.15245250925901e-05	0.239804086090496	NA
GM19152	1	NM_001199954.1	ACTG1	5_4_3	4->3->5	0.0375232126276694	5	0.288223221558964	1.15245250925901e-05	0.239804086090496	NA
GM19152	2	NM_001199954.1	ACTG1	5_4_3	3->4->5	0.0085080522637496	5	0.288223221558964	1.15245250925901e-05	0.239804086090496	NA
GM19152	1	NM_001199954.1	ACTG1	5_4_3	3->4->5	0.0233751160631383	6	0.288223221558964	1.15245250925901e-05	0.239804086090496	NA
GM19152	2	NM_001199954.1	ACTG1	5_4_3	4->3->5	0.0064543844759479	6	0.288223221558964	1.15245250925901e-05	0.239804086090496	NA
GM19152	1	NM_004924.5	ACTN4	18_19_20	20->19->18	0.887323943661972	1	0.207408529143343	1	1	NA
GM19152	2	NM_004924.5	ACTN4	18_19_20	20->19->18	0.744525547445255	1	0.207408529143343	1	1	NA
GM19152	1	NM_004924.5	ACTN4	18_19_20	19->20->18	0.0985915492957746	2	0.207408529143343	1	1	NA
GM19152	2	NM_004924.5	ACTN4	18_19_20	19->20->18	0.248175182481752	2	0.207408529143343	1	1	NA
GM19152	1	NM_004924.5	ACTN4	18_19_20	20->18->19	0.0140845070422535	3	0.207408529143343	1	1	NA
GM19152	2	NM_004924.5	ACTN4	18_19_20	19->18->20	0.0072992700729927	3	0.207408529143343	1	1	NA
GM19152	1	NM_005736.3	ACTR1A	8_7_6	8->7->6	0.444444444444444	1	0.264926232307816	1	1	NA
GM19152	2	NM_005736.3	ACTR1A	8_7_6	8->7->6	0.364583333333333	1	0.264926232307816	1	1	NA
GM19152	1	NM_005736.3	ACTR1A	8_7_6	8->6->7	0.444444444444444	2	0.264926232307816	1	1	NA
GM19152	2	NM_005736.3	ACTR1A	8_7_6	8->6->7	0.255208333333333	2	0.264926232307816	1	1	NA
GM19152	1	NM_005736.3	ACTR1A	8_7_6	6->8->7	0.111111111111111	3	0.264926232307816	1	1	NA
GM19152	2	NM_005736.3	ACTR1A	8_7_6	6->8->7	0.21875	3	0.264926232307816	1	1	NA
GM19152	2	NM_005736.3	ACTR1A	8_7_6	6->7->8	0.125	4	0.264926232307816	1	1	NA
GM19152	2	NM_005736.3	ACTR1A	8_7_6	7->8->6	0.0260416666666666	5	0.264926232307816	1	1	NA
GM19152	2	NM_005736.3	ACTR1A	8_7_6	7->6->8	0.0104166666666666	6	0.264926232307816	1	1	NA
GM19152	1	NM_005735.3	ACTR1B	10_9_8	9->8->10	0.582775119617225	1	0.0761233454661001	1	1	NA
GM19152	2	NM_005735.3	ACTR1B	10_9_8	9->8->10	0.54855195911414	1	0.0761233454661001	1	1	NA
GM19152	1	NM_005735.3	ACTR1B	10_9_8	9->10->8	0.361722488038278	2	0.0761233454661001	1	1	NA
GM19152	2	NM_005735.3	ACTR1B	10_9_8	9->10->8	0.333901192504259	2	0.0761233454661001	1	1	NA
GM19152	1	NM_005735.3	ACTR1B	10_9_8	8->9->10	0.0555023923444976	3	0.0761233454661001	1	1	NA
GM19152	2	NM_005735.3	ACTR1B	10_9_8	8->9->10	0.117546848381601	3	0.0761233454661001	1	1	NA
GM18853	1	NM_005735.3	ACTR1B	3_2_1	3->2->1	1	1	0.113818767846355	1	1	NA
GM18853	2	NM_005735.3	ACTR1B	3_2_1	3->2->1	0.908203125	1	0.113818767846355	1	1	NA
GM18853	2	NM_005735.3	ACTR1B	3_2_1	2->3->1	0.060546875	2	0.113818767846355	1	1	NA
GM18853	2	NM_005735.3	ACTR1B	3_2_1	3->1->2	0.029296875	3	0.113818767846355	1	1	NA
GM18853	2	NM_005735.3	ACTR1B	3_2_1	1->3->2	0.001953125	4	0.113818767846355	1	1	NA
GM19152	1	NM_005735.3	ACTR1B	3_2_1	3->2->1	0.845	1	0.0704573597547971	1	1	NA
GM19152	2	NM_005735.3	ACTR1B	3_2_1	3->2->1	0.902158273381295	1	0.0704573597547971	1	1	NA
GM19152	1	NM_005735.3	ACTR1B	3_2_1	2->3->1	0.13	2	0.0704573597547971	1	1	NA
GM19152	2	NM_005735.3	ACTR1B	3_2_1	2->3->1	0.0949640287769784	2	0.0704573597547971	1	1	NA
GM19152	1	NM_005735.3	ACTR1B	3_2_1	3->1->2	0.0216666666666666	3	0.0704573597547971	1	1	NA
GM19152	2	NM_005735.3	ACTR1B	3_2_1	2->1->3	0.0028776978417266	3	0.0704573597547971	1	1	NA
GM19152	1	NM_005735.3	ACTR1B	3_2_1	2->1->3	0.0033333333333333	4	0.0704573597547971	1	1	NA
GM19152	1	NM_005735.3	ACTR1B	4_3_2	3->2->4	0.392857142857143	1	0.198365959338194	1	1	NA
GM19152	2	NM_005735.3	ACTR1B	4_3_2	3->2->4	0.522727272727273	1	0.198365959338194	1	1	NA
GM19152	1	NM_005735.3	ACTR1B	4_3_2	3->4->2	0.267857142857143	2	0.198365959338194	1	1	NA
GM19152	2	NM_005735.3	ACTR1B	4_3_2	3->4->2	0.25	2	0.198365959338194	1	1	NA
GM19152	1	NM_005735.3	ACTR1B	4_3_2	4->3->2	0.267857142857143	3	0.198365959338194	1	1	NA
GM19152	2	NM_005735.3	ACTR1B	4_3_2	4->3->2	0.138888888888889	3	0.198365959338194	1	1	NA
GM19152	1	NM_005735.3	ACTR1B	4_3_2	4->2->3	0.0714285714285714	4	0.198365959338194	1	1	NA
GM19152	2	NM_005735.3	ACTR1B	4_3_2	2->3->4	0.058080808080808	4	0.198365959338194	1	1	NA
GM19152	2	NM_005735.3	ACTR1B	4_3_2	4->2->3	0.0252525252525252	5	0.198365959338194	1	1	NA
GM19152	2	NM_005735.3	ACTR1B	4_3_2	2->4->3	0.005050505050505	6	0.198365959338194	1	1	NA
GM18510	1	NM_005735.3	ACTR1B	5_4_3	4->3->5	0.52	1	0.363229588651616	1	1	NA
GM18510	2	NM_005735.3	ACTR1B	5_4_3	3->4->5	0.736842105263158	1	0.363229588651616	1	1	NA
GM18510	1	NM_005735.3	ACTR1B	5_4_3	3->4->5	0.48	2	0.363229588651616	1	1	NA
GM18510	2	NM_005735.3	ACTR1B	5_4_3	4->3->5	0.263157894736842	2	0.363229588651616	1	1	NA
GM18853	1	NM_005735.3	ACTR1B	5_4_3	3->4->5	0.705882352941177	1	0.351419973947206	1	0.954955666993836	NA
GM18853	2	NM_005735.3	ACTR1B	5_4_3	4->3->5	0.531858171154359	1	0.351419973947206	1	0.954955666993836	NA
GM18853	1	NM_005735.3	ACTR1B	5_4_3	4->3->5	0.294117647058823	2	0.351419973947206	1	0.954955666993836	NA
GM18853	2	NM_005735.3	ACTR1B	5_4_3	3->4->5	0.447880565182618	2	0.351419973947206	1	0.954955666993836	NA
GM18853	2	NM_005735.3	ACTR1B	5_4_3	4->5->3	0.0202612636630231	3	0.351419973947206	1	0.954955666993836	NA
GM18861	1	NM_005735.3	ACTR1B	5_4_3	3->4->5	0.727272727272727	1	0.557114433662128	0.995203837497223	1	NA
GM18861	2	NM_005735.3	ACTR1B	5_4_3	4->3->5	0.666666666666667	1	0.557114433662128	0.995203837497223	1	NA
GM18861	1	NM_005735.3	ACTR1B	5_4_3	4->3->5	0.272727272727273	2	0.557114433662128	0.995203837497223	1	NA
GM18861	2	NM_005735.3	ACTR1B	5_4_3	3->4->5	0.333333333333333	2	0.557114433662128	0.995203837497223	1	NA
GM19144	1	NM_005735.3	ACTR1B	5_4_3	4->3->5	0.68421052631579	1	0.185125370852612	1	1	NA
GM19144	2	NM_005735.3	ACTR1B	5_4_3	4->3->5	0.544488711819389	1	0.185125370852612	1	1	NA
GM19144	1	NM_005735.3	ACTR1B	5_4_3	3->4->5	0.31578947368421	2	0.185125370852612	1	1	NA
GM19144	2	NM_005735.3	ACTR1B	5_4_3	3->4->5	0.435590969455511	2	0.185125370852612	1	1	NA
GM19144	2	NM_005735.3	ACTR1B	5_4_3	4->5->3	0.0199203187250996	3	0.185125370852612	1	1	NA
GM19209	1	NM_005735.3	ACTR1B	5_4_3	4->3->5	0.55	1	0.439611651447195	0.725987019713438	1	NA
GM19209	2	NM_005735.3	ACTR1B	5_4_3	4->3->5	0.856847331402565	1	0.439611651447195	0.725987019713438	1	NA
GM19209	1	NM_005735.3	ACTR1B	5_4_3	3->4->5	0.45	2	0.439611651447195	0.725987019713438	1	NA
GM19209	2	NM_005735.3	ACTR1B	5_4_3	3->4->5	0.135291683905668	2	0.439611651447195	0.725987019713438	1	NA
GM19209	2	NM_005735.3	ACTR1B	5_4_3	4->5->3	0.0078609846917666	3	0.439611651447195	0.725987019713438	1	NA
GM19152	1	NM_005735.3	ACTR1B	5_4_3	3->4->5	0.614754098360656	1	0.112704295786486	1	1	NA
GM19152	2	NM_005735.3	ACTR1B	5_4_3	3->4->5	0.697431355181577	1	0.112704295786486	1	1	NA
GM19152	1	NM_005735.3	ACTR1B	5_4_3	4->3->5	0.368852459016393	2	0.112704295786486	1	1	NA
GM19152	2	NM_005735.3	ACTR1B	5_4_3	4->3->5	0.292471213463242	2	0.112704295786486	1	1	NA
GM19152	1	NM_005735.3	ACTR1B	5_4_3	3->5->4	0.011177347242921	3	0.112704295786486	1	1	NA
GM19152	2	NM_005735.3	ACTR1B	5_4_3	3->5->4	0.0054915854738706	3	0.112704295786486	1	1	NA
GM19152	1	NM_005735.3	ACTR1B	5_4_3	4->5->3	0.0044709388971684	4	0.112704295786486	1	1	NA
GM19152	2	NM_005735.3	ACTR1B	5_4_3	4->5->3	0.0046058458813108	4	0.112704295786486	1	1	NA
GM19152	1	NM_005735.3	ACTR1B	5_4_3	5->3->4	0.0004470938897168	5	0.112704295786486	1	1	NA
GM19152	1	NM_005735.3	ACTR1B	5_4_3	5->4->3	0.0002980625931445	6	0.112704295786486	1	1	NA
GM18510	1	NM_005735.3	ACTR1B	6_5_4	6->4->5	0.862068965517241	1	0.173861337503139	1	1	NA
GM18510	2	NM_005735.3	ACTR1B	6_5_4	6->4->5	0.739130434782609	1	0.173861337503139	1	1	NA
GM18510	1	NM_005735.3	ACTR1B	6_5_4	4->6->5	0.137931034482759	2	0.173861337503139	1	1	NA
GM18510	2	NM_005735.3	ACTR1B	6_5_4	4->6->5	0.260869565217391	2	0.173861337503139	1	1	NA
GM18522	1	NM_005735.3	ACTR1B	6_5_4	6->4->5	0.769230769230769	1	0.0722263327224904	1	1	NA
GM18522	2	NM_005735.3	ACTR1B	6_5_4	6->4->5	0.810690423162584	1	0.0722263327224904	1	1	NA
GM18522	1	NM_005735.3	ACTR1B	6_5_4	4->6->5	0.230769230769231	2	0.0722263327224904	1	1	NA
GM18522	2	NM_005735.3	ACTR1B	6_5_4	4->6->5	0.173719376391982	2	0.0722263327224904	1	1	NA
GM18522	2	NM_005735.3	ACTR1B	6_5_4	6->5->4	0.0155902004454342	3	0.0722263327224904	1	1	NA
GM18853	1	NM_005735.3	ACTR1B	6_5_4	6->4->5	0.740740740740741	1	0.114109824477194	1	1	NA
GM18853	2	NM_005735.3	ACTR1B	6_5_4	6->4->5	0.821428571428571	1	0.114109824477194	1	1	NA
GM18853	1	NM_005735.3	ACTR1B	6_5_4	4->6->5	0.259259259259259	2	0.114109824477194	1	1	NA
GM18853	2	NM_005735.3	ACTR1B	6_5_4	4->6->5	0.178571428571428	2	0.114109824477194	1	1	NA
GM19144	1	NM_005735.3	ACTR1B	6_5_4	6->4->5	0.705882352941177	1	0.158815426790561	1	1	NA
GM19144	2	NM_005735.3	ACTR1B	6_5_4	6->4->5	0.818181818181818	1	0.158815426790561	1	1	NA
GM19144	1	NM_005735.3	ACTR1B	6_5_4	4->6->5	0.294117647058823	2	0.158815426790561	1	1	NA
GM19144	2	NM_005735.3	ACTR1B	6_5_4	4->6->5	0.181818181818182	2	0.158815426790561	1	1	NA
GM19209	1	NM_005735.3	ACTR1B	6_5_4	6->4->5	0.869565217391304	1	0.522644142616144	0.690502490925991	1	NA
GM19209	2	NM_005735.3	ACTR1B	6_5_4	6->4->5	0.5	1	0.522644142616144	0.690502490925991	1	NA
GM19209	1	NM_005735.3	ACTR1B	6_5_4	4->6->5	0.130434782608696	2	0.522644142616144	0.690502490925991	1	NA
GM19209	2	NM_005735.3	ACTR1B	6_5_4	4->6->5	0.5	2	0.522644142616144	0.690502490925991	1	NA
GM19152	1	NM_005735.3	ACTR1B	6_5_4	6->4->5	0.935036496350365	1	0.111658224117011	1	1	NA
GM19152	2	NM_005735.3	ACTR1B	6_5_4	6->4->5	0.864159154491762	1	0.111658224117011	1	1	NA
GM19152	1	NM_005735.3	ACTR1B	6_5_4	4->6->5	0.0445255474452554	2	0.111658224117011	1	1	NA
GM19152	2	NM_005735.3	ACTR1B	6_5_4	4->6->5	0.129623873173764	2	0.111658224117011	1	1	NA
GM19152	1	NM_005735.3	ACTR1B	6_5_4	6->5->4	0.0204379562043795	3	0.111658224117011	1	1	NA
GM19152	2	NM_005735.3	ACTR1B	6_5_4	6->5->4	0.0062169723344731	3	0.111658224117011	1	1	NA
GM18510	1	NM_005735.3	ACTR1B	7_6_5	6->7->5	0.919148936170213	1	0.0496596493883376	1	1	NA
GM18510	2	NM_005735.3	ACTR1B	7_6_5	6->7->5	0.945511564092513	1	0.0496596493883376	1	1	NA
GM18510	1	NM_005735.3	ACTR1B	7_6_5	6->5->7	0.0680851063829787	2	0.0496596493883376	1	1	NA
GM18510	2	NM_005735.3	ACTR1B	7_6_5	6->5->7	0.0282242257938063	2	0.0496596493883376	1	1	NA
GM18510	1	NM_005735.3	ACTR1B	7_6_5	7->6->5	0.0127659574468085	3	0.0496596493883376	1	1	NA
GM18510	2	NM_005735.3	ACTR1B	7_6_5	7->6->5	0.0262642101136809	3	0.0496596493883376	1	1	NA
GM18522	1	NM_005735.3	ACTR1B	7_6_5	6->7->5	0.878828229027963	1	0.0342158033235509	1	1	NA
GM18522	2	NM_005735.3	ACTR1B	7_6_5	6->7->5	0.876826722338205	1	0.0342158033235509	1	1	NA
GM18522	1	NM_005735.3	ACTR1B	7_6_5	7->6->5	0.0732356857523302	2	0.0342158033235509	1	1	NA
GM18522	2	NM_005735.3	ACTR1B	7_6_5	6->5->7	0.0730688935281837	2	0.0342158033235509	1	1	NA
GM18522	1	NM_005735.3	ACTR1B	7_6_5	6->5->7	0.047936085219707	3	0.0342158033235509	1	1	NA
GM18522	2	NM_005735.3	ACTR1B	7_6_5	7->6->5	0.0501043841336116	3	0.0342158033235509	1	1	NA
GM18853	1	NM_005735.3	ACTR1B	7_6_5	6->7->5	0.955056179775281	1	0.102483126723382	0.84729784671166	1	NA
GM18853	2	NM_005735.3	ACTR1B	7_6_5	6->7->5	0.875643855776306	1	0.102483126723382	0.84729784671166	1	NA
GM18853	1	NM_005735.3	ACTR1B	7_6_5	6->5->7	0.0449438202247191	2	0.102483126723382	0.84729784671166	1	NA
GM18853	2	NM_005735.3	ACTR1B	7_6_5	7->6->5	0.0625459896983075	2	0.102483126723382	0.84729784671166	1	NA
GM18853	2	NM_005735.3	ACTR1B	7_6_5	6->5->7	0.0618101545253863	3	0.102483126723382	0.84729784671166	1	NA
GM18861	1	NM_005735.3	ACTR1B	7_6_5	6->7->5	0.931263858093126	1	0.0709013389666041	1	1	NA
GM18861	2	NM_005735.3	ACTR1B	7_6_5	6->7->5	0.9	1	0.0709013389666041	1	1	NA
GM18861	1	NM_005735.3	ACTR1B	7_6_5	7->6->5	0.0465631929046563	2	0.0709013389666041	1	1	NA
GM18861	2	NM_005735.3	ACTR1B	7_6_5	6->5->7	0.0799999999999999	2	0.0709013389666041	1	1	NA
GM18861	1	NM_005735.3	ACTR1B	7_6_5	6->5->7	0.0221729490022172	3	0.0709013389666041	1	1	NA
GM18861	2	NM_005735.3	ACTR1B	7_6_5	7->6->5	0.02	3	0.0709013389666041	1	1	NA
GM18870	1	NM_005735.3	ACTR1B	7_6_5	6->7->5	1	1	0.0689860274328338	1	1	NA
GM18870	2	NM_005735.3	ACTR1B	7_6_5	6->7->5	0.951219512195122	1	0.0689860274328338	1	1	NA
GM18870	2	NM_005735.3	ACTR1B	7_6_5	6->5->7	0.048780487804878	2	0.0689860274328338	1	1	NA
GM19144	1	NM_005735.3	ACTR1B	7_6_5	6->7->5	0.85338193600648	1	0.021615820733945	1	1	NA
GM19144	2	NM_005735.3	ACTR1B	7_6_5	6->7->5	0.847878008451222	1	0.021615820733945	1	1	NA
GM19144	1	NM_005735.3	ACTR1B	7_6_5	6->5->7	0.0870797893884163	2	0.021615820733945	1	1	NA
GM19144	2	NM_005735.3	ACTR1B	7_6_5	6->5->7	0.104354216424766	2	0.021615820733945	1	1	NA
GM19144	1	NM_005735.3	ACTR1B	7_6_5	7->6->5	0.0595382746051032	3	0.021615820733945	1	1	NA
GM19144	2	NM_005735.3	ACTR1B	7_6_5	7->6->5	0.0477677751240125	3	0.021615820733945	1	1	NA
GM19209	1	NM_005735.3	ACTR1B	7_6_5	6->7->5	0.941364818891335	1	0.0816534270863269	1	1	NA
GM19209	2	NM_005735.3	ACTR1B	7_6_5	6->7->5	0.878718842133476	1	0.0816534270863269	1	1	NA
GM19209	1	NM_005735.3	ACTR1B	7_6_5	6->5->7	0.0490294176505903	2	0.0816534270863269	1	1	NA
GM19209	2	NM_005735.3	ACTR1B	7_6_5	6->5->7	0.100107209863307	2	0.0816534270863269	1	1	NA
GM19209	1	NM_005735.3	ACTR1B	7_6_5	7->6->5	0.0096057634580748	3	0.0816534270863269	1	1	NA
GM19209	2	NM_005735.3	ACTR1B	7_6_5	7->6->5	0.0211739480032162	3	0.0816534270863269	1	1	NA
GM19152	1	NM_005735.3	ACTR1B	7_6_5	6->7->5	0.911931366837896	1	0.0989552765850445	1	1	NA
GM19152	2	NM_005735.3	ACTR1B	7_6_5	6->7->5	0.83247164133035	1	0.0989552765850445	1	1	NA
GM19152	1	NM_005735.3	ACTR1B	7_6_5	6->5->7	0.0815548376846899	2	0.0989552765850445	1	1	NA
GM19152	2	NM_005735.3	ACTR1B	7_6_5	6->5->7	0.133960953777298	2	0.0989552765850445	1	1	NA
GM19152	1	NM_005735.3	ACTR1B	7_6_5	7->6->5	0.0065137954774135	3	0.0989552765850445	1	1	NA
GM19152	2	NM_005735.3	ACTR1B	7_6_5	7->6->5	0.0335674048923528	3	0.0989552765850445	1	1	NA
GM18510	1	NM_005735.3	ACTR1B	8_7_6	8->6->7	0.652360515021459	1	0.284746694631906	1	1	NA
GM18510	2	NM_005735.3	ACTR1B	8_7_6	6->8->7	0.531737773152966	1	0.284746694631906	1	1	NA
GM18510	1	NM_005735.3	ACTR1B	8_7_6	6->8->7	0.32618025751073	2	0.284746694631906	1	1	NA
GM18510	2	NM_005735.3	ACTR1B	8_7_6	8->6->7	0.455775234131113	2	0.284746694631906	1	1	NA
GM18510	1	NM_005735.3	ACTR1B	8_7_6	6->7->8	0.0128755364806866	3	0.284746694631906	1	1	NA
GM18510	2	NM_005735.3	ACTR1B	8_7_6	8->7->6	0.0124869927159209	3	0.284746694631906	1	1	NA
GM18510	1	NM_005735.3	ACTR1B	8_7_6	8->7->6	0.0085836909871244	4	0.284746694631906	1	1	NA
GM18853	1	NM_005735.3	ACTR1B	8_7_6	6->8->7	0.540706605222734	1	0.160062318015088	1	0.543854942705342	NA
GM18853	2	NM_005735.3	ACTR1B	8_7_6	8->6->7	0.540697674418605	1	0.160062318015088	1	0.543854942705342	NA
GM18853	1	NM_005735.3	ACTR1B	8_7_6	8->6->7	0.442396313364055	2	0.160062318015088	1	0.543854942705342	NA
GM18853	2	NM_005735.3	ACTR1B	8_7_6	6->8->7	0.420542635658915	2	0.160062318015088	1	0.543854942705342	NA
GM18853	1	NM_005735.3	ACTR1B	8_7_6	6->7->8	0.0168970814132104	3	0.160062318015088	1	0.543854942705342	NA
GM18853	2	NM_005735.3	ACTR1B	8_7_6	8->7->6	0.0348837209302325	3	0.160062318015088	1	0.543854942705342	NA
GM18853	2	NM_005735.3	ACTR1B	8_7_6	7->8->6	0.003875968992248	4	0.160062318015088	1	0.543854942705342	NA
GM19209	1	NM_005735.3	ACTR1B	8_7_6	6->8->7	0.674860853432282	1	0.300864971449584	1	1	NA
GM19209	2	NM_005735.3	ACTR1B	8_7_6	8->6->7	0.521739130434783	1	0.300864971449584	1	1	NA
GM19209	1	NM_005735.3	ACTR1B	8_7_6	8->6->7	0.314935064935065	2	0.300864971449584	1	1	NA
GM19209	2	NM_005735.3	ACTR1B	8_7_6	6->8->7	0.456521739130435	2	0.300864971449584	1	1	NA
GM19209	1	NM_005735.3	ACTR1B	8_7_6	6->7->8	0.0069573283858998	3	0.300864971449584	1	1	NA
GM19209	2	NM_005735.3	ACTR1B	8_7_6	8->7->6	0.0115942028985507	3	0.300864971449584	1	1	NA
GM19209	1	NM_005735.3	ACTR1B	8_7_6	8->7->6	0.0032467532467532	4	0.300864971449584	1	1	NA
GM19209	2	NM_005735.3	ACTR1B	8_7_6	6->7->8	0.0101449275362318	4	0.300864971449584	1	1	NA
GM19152	1	NM_005735.3	ACTR1B	8_7_6	6->8->7	0.741360089186176	1	0.128222953878373	1	0.807427772632958	NA
GM19152	2	NM_005735.3	ACTR1B	8_7_6	6->8->7	0.658536585365854	1	0.128222953878373	1	0.807427772632958	NA
GM19152	1	NM_005735.3	ACTR1B	8_7_6	8->6->7	0.234113712374582	2	0.128222953878373	1	0.807427772632958	NA
GM19152	2	NM_005735.3	ACTR1B	8_7_6	8->6->7	0.329268292682927	2	0.128222953878373	1	0.807427772632958	NA
GM19152	1	NM_005735.3	ACTR1B	8_7_6	6->7->8	0.0211817168338907	3	0.128222953878373	1	0.807427772632958	NA
GM19152	2	NM_005735.3	ACTR1B	8_7_6	8->7->6	0.0121951219512195	3	0.128222953878373	1	0.807427772632958	NA
GM19152	1	NM_005735.3	ACTR1B	8_7_6	8->7->6	0.0033444816053511	4	0.128222953878373	1	0.807427772632958	NA
GM18510	1	NM_005735.3	ACTR1B	9_8_7	9->8->7	0.88145896656535	1	0.0460508403165826	1	1	NA
GM18510	2	NM_005735.3	ACTR1B	9_8_7	9->8->7	0.915688367129136	1	0.0460508403165826	1	1	NA
GM18510	1	NM_005735.3	ACTR1B	9_8_7	8->9->7	0.0881458966565349	2	0.0460508403165826	1	1	NA
GM18510	2	NM_005735.3	ACTR1B	9_8_7	8->9->7	0.0832443970117395	2	0.0460508403165826	1	1	NA
GM18510	1	NM_005735.3	ACTR1B	9_8_7	9->7->8	0.0303951367781155	3	0.0460508403165826	1	1	NA
GM18510	2	NM_005735.3	ACTR1B	9_8_7	8->7->9	0.0010672358591248	3	0.0460508403165826	1	1	NA
GM19152	1	NM_005735.3	ACTR1B	9_8_7	9->8->7	0.910814304179233	1	0.0353993045744548	1	0.868442354159409	NA
GM19152	2	NM_005735.3	ACTR1B	9_8_7	9->8->7	0.908529048207664	1	0.0353993045744548	1	0.868442354159409	NA
GM19152	1	NM_005735.3	ACTR1B	9_8_7	8->9->7	0.0650581645842309	2	0.0353993045744548	1	0.868442354159409	NA
GM19152	2	NM_005735.3	ACTR1B	9_8_7	8->9->7	0.0908529048207664	2	0.0353993045744548	1	0.868442354159409	NA
GM19152	1	NM_005735.3	ACTR1B	9_8_7	9->7->8	0.0241275312365359	3	0.0353993045744548	1	0.868442354159409	NA
GM19152	2	NM_005735.3	ACTR1B	9_8_7	8->7->9	0.0006180469715698	3	0.0353993045744548	1	0.868442354159409	NA
GM19152	1	NM_000022.3	ADA	5_4_3	3->5->4	0.296052631578947	1	0.61176300532314	0.995203837497223	1	NA
GM19152	2	NM_000022.3	ADA	5_4_3	5->4->3	0.780487804878049	1	0.61176300532314	0.995203837497223	1	NA
GM19152	1	NM_000022.3	ADA	5_4_3	5->4->3	0.25	2	0.61176300532314	0.995203837497223	1	NA
GM19152	2	NM_000022.3	ADA	5_4_3	3->4->5	0.073170731707317	2	0.61176300532314	0.995203837497223	1	NA
GM19152	1	NM_000022.3	ADA	5_4_3	3->4->5	0.236842105263158	3	0.61176300532314	0.995203837497223	1	NA
GM19152	2	NM_000022.3	ADA	5_4_3	5->3->4	0.073170731707317	3	0.61176300532314	0.995203837497223	1	NA
GM19152	1	NM_000022.3	ADA	5_4_3	4->5->3	0.125	4	0.61176300532314	0.995203837497223	1	NA
GM19152	2	NM_000022.3	ADA	5_4_3	3->5->4	0.073170731707317	4	0.61176300532314	0.995203837497223	1	NA
GM19152	1	NM_000022.3	ADA	5_4_3	5->3->4	0.0657894736842105	5	0.61176300532314	0.995203837497223	1	NA
GM19152	1	NM_000022.3	ADA	5_4_3	4->3->5	0.0263157894736842	6	0.61176300532314	0.995203837497223	1	NA
GM19152	1	NM_000022.3	ADA	6_5_4	6->5->4	0.625	1	0.0659997445182919	1	1	NA
GM19152	2	NM_000022.3	ADA	6_5_4	6->5->4	0.61764705882353	1	0.0659997445182919	1	1	NA
GM19152	1	NM_000022.3	ADA	6_5_4	6->4->5	0.3125	2	0.0659997445182919	1	1	NA
GM19152	2	NM_000022.3	ADA	6_5_4	6->4->5	0.264705882352941	2	0.0659997445182919	1	1	NA
GM19152	1	NM_000022.3	ADA	6_5_4	5->6->4	0.0568181818181818	3	0.0659997445182919	1	1	NA
GM19152	2	NM_000022.3	ADA	6_5_4	5->6->4	0.0686274509803921	3	0.0659997445182919	1	1	NA
GM19152	1	NM_000022.3	ADA	6_5_4	5->4->6	0.0056818181818181	4	0.0659997445182919	1	1	NA
GM19152	2	NM_000022.3	ADA	6_5_4	5->4->6	0.0490196078431372	4	0.0659997445182919	1	1	NA
GM19144	1	NM_000022.3	ADA	7_6_5	6->5->7	0.818770226537217	1	0.29610704567851	1	1	NA
GM19144	2	NM_000022.3	ADA	7_6_5	6->5->7	0.594594594594595	1	0.29610704567851	1	1	NA
GM19144	1	NM_000022.3	ADA	7_6_5	6->7->5	0.106796116504854	2	0.29610704567851	1	1	NA
GM19144	2	NM_000022.3	ADA	7_6_5	6->7->5	0.297297297297297	2	0.29610704567851	1	1	NA
GM19144	1	NM_000022.3	ADA	7_6_5	5->6->7	0.0744336569579288	3	0.29610704567851	1	1	NA
GM19144	2	NM_000022.3	ADA	7_6_5	5->6->7	0.108108108108108	3	0.29610704567851	1	1	NA
GM19152	1	NM_000022.3	ADA	7_6_5	6->5->7	0.814256339958876	1	0.243181470884149	1	1	NA
GM19152	2	NM_000022.3	ADA	7_6_5	6->5->7	0.644808743169399	1	0.243181470884149	1	1	NA
GM19152	1	NM_000022.3	ADA	7_6_5	5->6->7	0.14804660726525	2	0.243181470884149	1	1	NA
GM19152	2	NM_000022.3	ADA	7_6_5	5->6->7	0.322404371584699	2	0.243181470884149	1	1	NA
GM19152	1	NM_000022.3	ADA	7_6_5	6->7->5	0.0376970527758738	3	0.243181470884149	1	1	NA
GM19152	2	NM_000022.3	ADA	7_6_5	6->7->5	0.0327868852459016	3	0.243181470884149	1	1	NA
GM19209	1	NM_000022.3	ADA	8_7_6	8->6->7	0.876923076923077	1	0.0358205051416517	1	1	NA
GM19209	2	NM_000022.3	ADA	8_7_6	8->6->7	0.904761904761905	1	0.0358205051416517	1	1	NA
GM19209	1	NM_000022.3	ADA	8_7_6	6->8->7	0.116923076923077	2	0.0358205051416517	1	1	NA
GM19209	2	NM_000022.3	ADA	8_7_6	6->8->7	0.0952380952380952	2	0.0358205051416517	1	1	NA
GM19209	1	NM_000022.3	ADA	8_7_6	6->7->8	0.0061538461538461	3	0.0358205051416517	1	1	NA
GM18510	1	NM_207194.2	ADAM15	19_20_21	21->19->20	0.923076923076923	1	0.108785658644084	1	1	NA
GM18510	2	NM_207194.2	ADAM15	19_20_21	21->19->20	1	1	0.108785658644084	1	1	NA
GM18510	1	NM_207194.2	ADAM15	19_20_21	19->21->20	0.0769230769230769	2	0.108785658644084	1	1	NA
GM19209	1	NM_001109.4	ADAM8	12_11_10	12->10->11	0.551343900758098	1	0.087831510044645	1	1	NA
GM19209	2	NM_001109.4	ADAM8	12_11_10	12->10->11	0.620265617314314	1	0.087831510044645	1	1	NA
GM19209	1	NM_001109.4	ADAM8	12_11_10	10->12->11	0.385940730530669	2	0.087831510044645	1	1	NA
GM19209	2	NM_001109.4	ADAM8	12_11_10	10->12->11	0.333989178553861	2	0.087831510044645	1	1	NA
GM19209	1	NM_001109.4	ADAM8	12_11_10	12->11->10	0.0482425913163335	3	0.087831510044645	1	1	NA
GM19209	2	NM_001109.4	ADAM8	12_11_10	12->11->10	0.0319724545007378	3	0.087831510044645	1	1	NA
GM19209	1	NM_001109.4	ADAM8	12_11_10	10->11->12	0.0144727773949	4	0.087831510044645	1	1	NA
GM19209	2	NM_001109.4	ADAM8	12_11_10	10->11->12	0.013772749631087	4	0.087831510044645	1	1	NA
GM19152	1	NM_001109.4	ADAM8	12_11_10	10->12->11	0.508490566037736	1	0.277008637344105	1	1	NA
GM19152	2	NM_001109.4	ADAM8	12_11_10	12->10->11	0.636542239685658	1	0.277008637344105	1	1	NA
GM19152	1	NM_001109.4	ADAM8	12_11_10	12->10->11	0.435849056603774	2	0.277008637344105	1	1	NA
GM19152	2	NM_001109.4	ADAM8	12_11_10	10->12->11	0.318271119842829	2	0.277008637344105	1	1	NA
GM19152	1	NM_001109.4	ADAM8	12_11_10	10->11->12	0.0330188679245282	3	0.277008637344105	1	1	NA
GM19152	2	NM_001109.4	ADAM8	12_11_10	10->11->12	0.0235756385068762	3	0.277008637344105	1	1	NA
GM19152	1	NM_001109.4	ADAM8	12_11_10	12->11->10	0.0226415094339622	4	0.277008637344105	1	1	NA
GM19152	2	NM_001109.4	ADAM8	12_11_10	12->11->10	0.0117878192534381	4	0.277008637344105	1	1	NA
GM19152	2	NM_001109.4	ADAM8	12_11_10	11->10->12	0.0078585461689587	5	0.277008637344105	1	1	NA
GM19152	2	NM_001109.4	ADAM8	12_11_10	11->12->10	0.0019646365422396	6	0.277008637344105	1	1	NA
GM19152	1	NM_001109.4	ADAM8	18_17_16	16->17->18	0.976190476190476	1	0.0336717514850737	1	1	NA
GM19152	2	NM_001109.4	ADAM8	18_17_16	16->17->18	1	1	0.0336717514850737	1	1	NA
GM19152	1	NM_001109.4	ADAM8	18_17_16	16->18->17	0.0238095238095238	2	0.0336717514850737	1	1	NA
GM18501	1	NM_001109.4	ADAM8	19_18_17	17->19->18	0.695652173913043	1	0.531252399082763	0.455511453627031	1	NA
GM18501	2	NM_001109.4	ADAM8	19_18_17	19->17->18	0.68	1	0.531252399082763	0.455511453627031	1	NA
GM18501	1	NM_001109.4	ADAM8	19_18_17	19->17->18	0.304347826086956	2	0.531252399082763	0.455511453627031	1	NA
GM18501	2	NM_001109.4	ADAM8	19_18_17	17->19->18	0.32	2	0.531252399082763	0.455511453627031	1	NA
GM18510	1	NM_001109.4	ADAM8	19_18_17	17->19->18	0.578947368421053	1	0.0473660044813956	1	1	NA
GM18510	2	NM_001109.4	ADAM8	19_18_17	17->19->18	0.545454545454545	1	0.0473660044813956	1	1	NA
GM18510	1	NM_001109.4	ADAM8	19_18_17	19->17->18	0.421052631578947	2	0.0473660044813956	1	1	NA
GM18510	2	NM_001109.4	ADAM8	19_18_17	19->17->18	0.454545454545454	2	0.0473660044813956	1	1	NA
GM18853	1	NM_001109.4	ADAM8	19_18_17	19->17->18	0.833333333333333	1	0.572419775246253	0.728670244070585	1	NA
GM18853	2	NM_001109.4	ADAM8	19_18_17	17->19->18	0.571428571428571	1	0.572419775246253	0.728670244070585	1	NA
GM18853	1	NM_001109.4	ADAM8	19_18_17	17->19->18	0.166666666666667	2	0.572419775246253	0.728670244070585	1	NA
GM18853	2	NM_001109.4	ADAM8	19_18_17	19->17->18	0.428571428571428	2	0.572419775246253	0.728670244070585	1	NA
GM18870	1	NM_001109.4	ADAM8	19_18_17	17->19->18	0.576923076923077	1	0.609210480539319	0.89458372121318	1	NA
GM18870	2	NM_001109.4	ADAM8	19_18_17	19->17->18	0.833333333333333	1	0.609210480539319	0.89458372121318	1	NA
GM18870	1	NM_001109.4	ADAM8	19_18_17	19->17->18	0.384615384615385	2	0.609210480539319	0.89458372121318	1	NA
GM18870	2	NM_001109.4	ADAM8	19_18_17	17->19->18	0.166666666666667	2	0.609210480539319	0.89458372121318	1	NA
GM18870	1	NM_001109.4	ADAM8	19_18_17	17->18->19	0.0384615384615384	3	0.609210480539319	0.89458372121318	1	NA
GM19144	1	NM_001109.4	ADAM8	19_18_17	19->17->18	0.615384615384615	1	0.214299422621796	1	1	NA
GM19144	2	NM_001109.4	ADAM8	19_18_17	19->17->18	0.761994355597366	1	0.214299422621796	1	1	NA
GM19144	1	NM_001109.4	ADAM8	19_18_17	17->19->18	0.384615384615385	2	0.214299422621796	1	1	NA
GM19144	2	NM_001109.4	ADAM8	19_18_17	17->19->18	0.22859830667921	2	0.214299422621796	1	1	NA
GM19144	2	NM_001109.4	ADAM8	19_18_17	19->18->17	0.0094073377234242	3	0.214299422621796	1	1	NA
GM19209	1	NM_001109.4	ADAM8	19_18_17	17->19->18	0.538828013339686	1	0.105917158625876	1	1	NA
GM19209	2	NM_001109.4	ADAM8	19_18_17	17->19->18	0.607401105912378	1	0.105917158625876	1	1	NA
GM19209	1	NM_001109.4	ADAM8	19_18_17	19->17->18	0.455931395902811	2	0.105917158625876	1	1	NA
GM19209	2	NM_001109.4	ADAM8	19_18_17	19->17->18	0.376010208421948	2	0.105917158625876	1	1	NA
GM19209	1	NM_001109.4	ADAM8	19_18_17	19->18->17	0.0052405907575035	3	0.105917158625876	1	1	NA
GM19209	2	NM_001109.4	ADAM8	19_18_17	19->18->17	0.0165886856656741	3	0.105917158625876	1	1	NA
GM19152	1	NM_001109.4	ADAM8	19_18_17	19->17->18	0.539927404718693	1	0.463341395620718	0.459173608683292	1	NA
GM19152	2	NM_001109.4	ADAM8	19_18_17	19->17->18	0.875	1	0.463341395620718	0.459173608683292	1	NA
GM19152	1	NM_001109.4	ADAM8	19_18_17	17->19->18	0.44464609800363	2	0.463341395620718	0.459173608683292	1	NA
GM19152	2	NM_001109.4	ADAM8	19_18_17	17->19->18	0.125	2	0.463341395620718	0.459173608683292	1	NA
GM19152	1	NM_001109.4	ADAM8	19_18_17	19->18->17	0.0154264972776769	3	0.463341395620718	0.459173608683292	1	NA
GM18522	1	NM_001109.4	ADAM8	20_19_18	20->19->18	1	1	0	1	1	NA
GM18522	2	NM_001109.4	ADAM8	20_19_18	20->19->18	1	1	0	1	1	NA
GM19144	1	NM_001109.4	ADAM8	20_19_18	20->19->18	1	1	0	1	1	NA
GM19144	2	NM_001109.4	ADAM8	20_19_18	20->19->18	1	1	0	1	1	NA
GM18510	1	NM_001025107.2	ADAR	10_9_8	9->8->10	0.891304347826087	1	0.153054363549134	1	1	NA
GM18510	2	NM_001025107.2	ADAR	10_9_8	9->8->10	0.766423357664234	1	0.153054363549134	1	1	NA
GM18510	1	NM_001025107.2	ADAR	10_9_8	9->10->8	0.108695652173913	2	0.153054363549134	1	1	NA
GM18510	2	NM_001025107.2	ADAR	10_9_8	9->10->8	0.175182481751825	2	0.153054363549134	1	1	NA
GM18510	2	NM_001025107.2	ADAR	10_9_8	10->9->8	0.0583941605839416	3	0.153054363549134	1	1	NA
GM18853	1	NM_001025107.2	ADAR	10_9_8	9->8->10	0.680221811460259	1	0.231627037488049	0.941490645552009	1	NA
GM18853	2	NM_001025107.2	ADAR	10_9_8	9->8->10	0.714285714285714	1	0.231627037488049	0.941490645552009	1	NA
GM18853	1	NM_001025107.2	ADAR	10_9_8	8->9->10	0.170055452865065	2	0.231627037488049	0.941490645552009	1	NA
GM18853	2	NM_001025107.2	ADAR	10_9_8	9->10->8	0.285714285714286	2	0.231627037488049	0.941490645552009	1	NA
GM18853	1	NM_001025107.2	ADAR	10_9_8	9->10->8	0.133086876155268	3	0.231627037488049	0.941490645552009	1	NA
GM18853	1	NM_001025107.2	ADAR	10_9_8	10->9->8	0.0166358595194085	4	0.231627037488049	0.941490645552009	1	NA
GM19209	1	NM_001025107.2	ADAR	10_9_8	9->8->10	0.724050632911392	1	0.14204414624029	1	1	NA
GM19209	2	NM_001025107.2	ADAR	10_9_8	9->8->10	0.832049306625578	1	0.14204414624029	1	1	NA
GM19209	1	NM_001025107.2	ADAR	10_9_8	9->10->8	0.164556962025316	2	0.14204414624029	1	1	NA
GM19209	2	NM_001025107.2	ADAR	10_9_8	8->9->10	0.0832049306625577	2	0.14204414624029	1	1	NA
GM19209	1	NM_001025107.2	ADAR	10_9_8	8->9->10	0.111392405063291	3	0.14204414624029	1	1	NA
GM19209	2	NM_001025107.2	ADAR	10_9_8	9->10->8	0.0770416024653312	3	0.14204414624029	1	1	NA
GM19209	2	NM_001025107.2	ADAR	10_9_8	10->9->8	0.0077041602465331	4	0.14204414624029	1	1	NA
GM18510	1	NM_001025107.2	ADAR	12_11_10	11->12->10	0.717596566523605	1	0.133034997417573	0.953510299435312	1	NA
GM18510	2	NM_001025107.2	ADAR	12_11_10	11->12->10	0.629093198992443	1	0.133034997417573	0.953510299435312	1	NA
GM18510	1	NM_001025107.2	ADAR	12_11_10	11->10->12	0.244635193133047	2	0.133034997417573	0.953510299435312	1	NA
GM18510	2	NM_001025107.2	ADAR	12_11_10	11->10->12	0.323047858942066	2	0.133034997417573	0.953510299435312	1	NA
GM18510	1	NM_001025107.2	ADAR	12_11_10	12->11->10	0.0377682403433476	3	0.133034997417573	0.953510299435312	1	NA
GM18510	2	NM_001025107.2	ADAR	12_11_10	10->11->12	0.0478589420654911	3	0.133034997417573	0.953510299435312	1	NA
GM18853	1	NM_001025107.2	ADAR	12_11_10	11->12->10	0.542936288088643	1	0.253792320888744	1	0.664760166457528	NA
GM18853	2	NM_001025107.2	ADAR	12_11_10	11->12->10	0.735	1	0.253792320888744	1	0.664760166457528	NA
GM18853	1	NM_001025107.2	ADAR	12_11_10	11->10->12	0.38781163434903	2	0.253792320888744	1	0.664760166457528	NA
GM18853	2	NM_001025107.2	ADAR	12_11_10	11->10->12	0.225	2	0.253792320888744	1	0.664760166457528	NA
GM18853	1	NM_001025107.2	ADAR	12_11_10	10->11->12	0.0692520775623268	3	0.253792320888744	1	0.664760166457528	NA
GM18853	2	NM_001025107.2	ADAR	12_11_10	10->11->12	0.0375	3	0.253792320888744	1	0.664760166457528	NA
GM18853	2	NM_001025107.2	ADAR	12_11_10	10->12->11	0.0025	4	0.253792320888744	1	0.664760166457528	NA
GM18861	1	NM_001025107.2	ADAR	12_11_10	11->12->10	0.68421052631579	1	0.232837835820777	1	1	NA
GM18861	2	NM_001025107.2	ADAR	12_11_10	11->12->10	0.53551912568306	1	0.232837835820777	1	1	NA
GM18861	1	NM_001025107.2	ADAR	12_11_10	11->10->12	0.256578947368421	2	0.232837835820777	1	1	NA
GM18861	2	NM_001025107.2	ADAR	12_11_10	11->10->12	0.433515482695811	2	0.232837835820777	1	1	NA
GM18861	1	NM_001025107.2	ADAR	12_11_10	10->11->12	0.0592105263157894	3	0.232837835820777	1	1	NA
GM18861	2	NM_001025107.2	ADAR	12_11_10	10->11->12	0.0309653916211293	3	0.232837835820777	1	1	NA
GM19144	1	NM_001025107.2	ADAR	12_11_10	11->12->10	0.603330068560235	1	0.144581749558623	0.954955666993836	1	NA
GM19144	2	NM_001025107.2	ADAR	12_11_10	11->12->10	0.648553900087642	1	0.144581749558623	0.954955666993836	1	NA
GM19144	1	NM_001025107.2	ADAR	12_11_10	11->10->12	0.370225269343781	2	0.144581749558623	0.954955666993836	1	NA
GM19144	2	NM_001025107.2	ADAR	12_11_10	11->10->12	0.245398773006135	2	0.144581749558623	0.954955666993836	1	NA
GM19144	1	NM_001025107.2	ADAR	12_11_10	10->11->12	0.0264446620959843	3	0.144581749558623	0.954955666993836	1	NA
GM19144	2	NM_001025107.2	ADAR	12_11_10	10->11->12	0.0736196319018404	3	0.144581749558623	0.954955666993836	1	NA
GM19144	2	NM_001025107.2	ADAR	12_11_10	12->11->10	0.0324276950043821	4	0.144581749558623	0.954955666993836	1	NA
GM19209	1	NM_001025107.2	ADAR	12_11_10	11->12->10	0.650853889943074	1	0.141792067064584	1	1	NA
GM19209	2	NM_001025107.2	ADAR	12_11_10	11->12->10	0.738461538461538	1	0.141792067064584	1	1	NA
GM19209	1	NM_001025107.2	ADAR	12_11_10	11->10->12	0.30550284629981	2	0.141792067064584	1	1	NA
GM19209	2	NM_001025107.2	ADAR	12_11_10	11->10->12	0.196153846153846	2	0.141792067064584	1	1	NA
GM19209	1	NM_001025107.2	ADAR	12_11_10	10->11->12	0.0436432637571157	3	0.141792067064584	1	1	NA
GM19209	2	NM_001025107.2	ADAR	12_11_10	10->11->12	0.0653846153846153	3	0.141792067064584	1	1	NA
GM18510	1	NM_001025107.2	ADAR	13_12_11	11->12->13	0.899736147757256	1	0.0568036317696415	1	1	NA
GM18510	2	NM_001025107.2	ADAR	13_12_11	11->12->13	0.944339265429761	1	0.0568036317696415	1	1	NA
GM18510	1	NM_001025107.2	ADAR	13_12_11	11->13->12	0.0681618293755497	2	0.0568036317696415	1	1	NA
GM18510	2	NM_001025107.2	ADAR	13_12_11	11->13->12	0.0488451344187807	2	0.0568036317696415	1	1	NA
GM18510	1	NM_001025107.2	ADAR	13_12_11	12->11->13	0.0290237467018469	3	0.0568036317696415	1	1	NA
GM18510	2	NM_001025107.2	ADAR	13_12_11	13->11->12	0.0068156001514577	3	0.0568036317696415	1	1	NA
GM18510	1	NM_001025107.2	ADAR	13_12_11	13->11->12	0.0021987686895338	4	0.0568036317696415	1	1	NA
GM18510	1	NM_001025107.2	ADAR	13_12_11	12->13->11	0.0004397537379067	5	0.0568036317696415	1	1	NA
GM18510	1	NM_001025107.2	ADAR	13_12_11	13->12->11	0.0004397537379067	6	0.0568036317696415	1	1	NA
GM18522	1	NM_001025107.2	ADAR	13_12_11	11->12->13	0.966850828729282	1	0.043502805933767	1	1	NA
GM18522	2	NM_001025107.2	ADAR	13_12_11	11->12->13	1	1	0.043502805933767	1	1	NA
GM18522	1	NM_001025107.2	ADAR	13_12_11	11->13->12	0.0276243093922651	2	0.043502805933767	1	1	NA
GM18522	1	NM_001025107.2	ADAR	13_12_11	13->11->12	0.005524861878453	3	0.043502805933767	1	1	NA
GM18853	1	NM_001025107.2	ADAR	13_12_11	11->12->13	0.920259376095338	1	0.0537763293535218	1	1	NA
GM18853	2	NM_001025107.2	ADAR	13_12_11	11->12->13	0.953252535246104	1	0.0537763293535218	1	1	NA
GM18853	1	NM_001025107.2	ADAR	13_12_11	11->13->12	0.0620399579390115	2	0.0537763293535218	1	1	NA
GM18853	2	NM_001025107.2	ADAR	13_12_11	12->11->13	0.0232500618352708	2	0.0537763293535218	1	1	NA
GM18853	1	NM_001025107.2	ADAR	13_12_11	12->11->13	0.0155976165439887	3	0.0537763293535218	1	1	NA
GM18853	2	NM_001025107.2	ADAR	13_12_11	11->13->12	0.0202819688350235	3	0.0537763293535218	1	1	NA
GM18853	1	NM_001025107.2	ADAR	13_12_11	13->11->12	0.0021030494216614	4	0.0537763293535218	1	1	NA
GM18853	2	NM_001025107.2	ADAR	13_12_11	13->11->12	0.0019787286668315	4	0.0537763293535218	1	1	NA
GM18853	2	NM_001025107.2	ADAR	13_12_11	13->12->11	0.0009893643334157	5	0.0537763293535218	1	1	NA
GM18853	2	NM_001025107.2	ADAR	13_12_11	12->13->11	0.0002473410833539	6	0.0537763293535218	1	1	NA
GM18861	1	NM_001025107.2	ADAR	13_12_11	11->12->13	0.903272727272727	1	0.0269130966497267	1	1	NA
GM18861	2	NM_001025107.2	ADAR	13_12_11	11->12->13	0.883376849434291	1	0.0269130966497267	1	1	NA
GM18861	1	NM_001025107.2	ADAR	13_12_11	11->13->12	0.0589090909090909	2	0.0269130966497267	1	1	NA
GM18861	2	NM_001025107.2	ADAR	13_12_11	11->13->12	0.0757180156657963	2	0.0269130966497267	1	1	NA
GM18861	1	NM_001025107.2	ADAR	13_12_11	12->11->13	0.0334545454545454	3	0.0269130966497267	1	1	NA
GM18861	2	NM_001025107.2	ADAR	13_12_11	12->11->13	0.0304612706701479	3	0.0269130966497267	1	1	NA
GM18861	1	NM_001025107.2	ADAR	13_12_11	13->11->12	0.0043636363636363	4	0.0269130966497267	1	1	NA
GM18861	2	NM_001025107.2	ADAR	13_12_11	13->11->12	0.010443864229765	4	0.0269130966497267	1	1	NA
GM19102	1	NM_001025107.2	ADAR	13_12_11	11->12->13	0.947867298578199	1	0.00432978119061623	1	1	NA
GM19102	2	NM_001025107.2	ADAR	13_12_11	11->12->13	0.947916666666667	1	0.00432978119061623	1	1	NA
GM19102	1	NM_001025107.2	ADAR	13_12_11	11->13->12	0.0473933649289099	2	0.00432978119061623	1	1	NA
GM19102	2	NM_001025107.2	ADAR	13_12_11	11->13->12	0.0451388888888888	2	0.00432978119061623	1	1	NA
GM19102	1	NM_001025107.2	ADAR	13_12_11	13->11->12	0.0047393364928909	3	0.00432978119061623	1	1	NA
GM19102	2	NM_001025107.2	ADAR	13_12_11	13->11->12	0.0034722222222222	3	0.00432978119061623	1	1	NA
GM19102	2	NM_001025107.2	ADAR	13_12_11	13->12->11	0.0034722222222222	4	0.00432978119061623	1	1	NA
GM19223	1	NM_001025107.2	ADAR	13_12_11	11->12->13	1	1	0.157134840263677	1	1	NA
GM19223	2	NM_001025107.2	ADAR	13_12_11	11->12->13	0.888888888888889	1	0.157134840263677	1	1	NA
GM19223	2	NM_001025107.2	ADAR	13_12_11	12->11->13	0.111111111111111	2	0.157134840263677	1	1	NA
GM19144	1	NM_001025107.2	ADAR	13_12_11	11->12->13	0.884615384615385	1	0.103559458204274	1	1	NA
GM19144	2	NM_001025107.2	ADAR	13_12_11	11->12->13	0.962975543478261	1	0.103559458204274	1	1	NA
GM19144	1	NM_001025107.2	ADAR	13_12_11	11->13->12	0.102564102564103	2	0.103559458204274	1	1	NA
GM19144	2	NM_001025107.2	ADAR	13_12_11	11->13->12	0.0356657608695652	2	0.103559458204274	1	1	NA
GM19144	1	NM_001025107.2	ADAR	13_12_11	13->11->12	0.0113960113960113	3	0.103559458204274	1	1	NA
GM19144	2	NM_001025107.2	ADAR	13_12_11	13->11->12	0.0010190217391304	3	0.103559458204274	1	1	NA
GM19144	1	NM_001025107.2	ADAR	13_12_11	13->12->11	0.0014245014245014	4	0.103559458204274	1	1	NA
GM19144	2	NM_001025107.2	ADAR	13_12_11	13->12->11	0.0003396739130434	4	0.103559458204274	1	1	NA
GM19209	1	NM_001025107.2	ADAR	13_12_11	11->12->13	0.906747120131651	1	0.0609105780230066	1	1	NA
GM19209	2	NM_001025107.2	ADAR	13_12_11	11->12->13	0.951219512195122	1	0.0609105780230066	1	1	NA
GM19209	1	NM_001025107.2	ADAR	13_12_11	11->13->12	0.0833790455293472	2	0.0609105780230066	1	1	NA
GM19209	2	NM_001025107.2	ADAR	13_12_11	11->13->12	0.0418118466898954	2	0.0609105780230066	1	1	NA
GM19209	1	NM_001025107.2	ADAR	13_12_11	13->11->12	0.0087767416346681	3	0.0609105780230066	1	1	NA
GM19209	2	NM_001025107.2	ADAR	13_12_11	13->11->12	0.0069686411149825	3	0.0609105780230066	1	1	NA
GM19209	1	NM_001025107.2	ADAR	13_12_11	13->12->11	0.0010970927043335	4	0.0609105780230066	1	1	NA
GM18510	1	NM_001025107.2	ADAR	14_13_12	14->12->13	0.835955056179775	1	0.094897133096783	1	1	NA
GM18510	2	NM_001025107.2	ADAR	14_13_12	14->12->13	0.774468085106383	1	0.094897133096783	1	1	NA
GM18510	1	NM_001025107.2	ADAR	14_13_12	14->13->12	0.0943820224719101	2	0.094897133096783	1	1	NA
GM18510	2	NM_001025107.2	ADAR	14_13_12	14->13->12	0.165957446808511	2	0.094897133096783	1	1	NA
GM18510	1	NM_001025107.2	ADAR	14_13_12	12->14->13	0.0696629213483146	3	0.094897133096783	1	1	NA
GM18510	2	NM_001025107.2	ADAR	14_13_12	12->14->13	0.0595744680851063	3	0.094897133096783	1	1	NA
GM18522	1	NM_001025107.2	ADAR	14_13_12	14->12->13	0.826271186440678	1	0.1068685796251	1	0.971633892149283	NA
GM18522	2	NM_001025107.2	ADAR	14_13_12	14->12->13	0.875486381322957	1	0.1068685796251	1	0.971633892149283	NA
GM18522	1	NM_001025107.2	ADAR	14_13_12	14->13->12	0.10593220338983	2	0.1068685796251	1	0.971633892149283	NA
GM18522	2	NM_001025107.2	ADAR	14_13_12	12->14->13	0.105058365758755	2	0.1068685796251	1	0.971633892149283	NA
GM18522	1	NM_001025107.2	ADAR	14_13_12	12->14->13	0.0661016949152542	3	0.1068685796251	1	0.971633892149283	NA
GM18522	2	NM_001025107.2	ADAR	14_13_12	14->13->12	0.0194552529182879	3	0.1068685796251	1	0.971633892149283	NA
GM18522	1	NM_001025107.2	ADAR	14_13_12	12->13->14	0.0016949152542372	4	0.1068685796251	1	0.971633892149283	NA
GM18853	1	NM_001025107.2	ADAR	14_13_12	14->12->13	0.8421875	1	0.100654384624743	1	1	NA
GM18853	2	NM_001025107.2	ADAR	14_13_12	14->12->13	0.776073619631902	1	0.100654384624743	1	1	NA
GM18853	1	NM_001025107.2	ADAR	14_13_12	14->13->12	0.0802083333333333	2	0.100654384624743	1	1	NA
GM18853	2	NM_001025107.2	ADAR	14_13_12	12->14->13	0.151840490797546	2	0.100654384624743	1	1	NA
GM18853	1	NM_001025107.2	ADAR	14_13_12	12->14->13	0.0765625	3	0.100654384624743	1	1	NA
GM18853	2	NM_001025107.2	ADAR	14_13_12	14->13->12	0.0705521472392638	3	0.100654384624743	1	1	NA
GM18853	1	NM_001025107.2	ADAR	14_13_12	13->14->12	0.0010416666666666	4	0.100654384624743	1	1	NA
GM18853	2	NM_001025107.2	ADAR	14_13_12	13->14->12	0.0015337423312883	4	0.100654384624743	1	1	NA
GM18861	1	NM_001025107.2	ADAR	14_13_12	14->12->13	0.77979274611399	1	0.0593105404976056	1	1	NA
GM18861	2	NM_001025107.2	ADAR	14_13_12	14->12->13	0.813397129186603	1	0.0593105404976056	1	1	NA
GM18861	1	NM_001025107.2	ADAR	14_13_12	14->13->12	0.11139896373057	2	0.0593105404976056	1	1	NA
GM18861	2	NM_001025107.2	ADAR	14_13_12	14->13->12	0.119617224880383	2	0.0593105404976056	1	1	NA
GM18861	1	NM_001025107.2	ADAR	14_13_12	12->14->13	0.10880829015544	3	0.0593105404976056	1	1	NA
GM18861	2	NM_001025107.2	ADAR	14_13_12	12->14->13	0.0610047846889952	3	0.0593105404976056	1	1	NA
GM18861	2	NM_001025107.2	ADAR	14_13_12	13->14->12	0.0059808612440191	4	0.0593105404976056	1	1	NA
GM18870	1	NM_001025107.2	ADAR	14_13_12	14->12->13	0.826086956521739	1	0.0412621963541989	1	1	NA
GM18870	2	NM_001025107.2	ADAR	14_13_12	14->12->13	0.851063829787234	1	0.0412621963541989	1	1	NA
GM18870	1	NM_001025107.2	ADAR	14_13_12	14->13->12	0.173913043478261	2	0.0412621963541989	1	1	NA
GM18870	2	NM_001025107.2	ADAR	14_13_12	14->13->12	0.141843971631206	2	0.0412621963541989	1	1	NA
GM18870	2	NM_001025107.2	ADAR	14_13_12	13->14->12	0.0070921985815602	3	0.0412621963541989	1	1	NA
GM19102	1	NM_001025107.2	ADAR	14_13_12	14->12->13	0.756	1	0.0440649231421495	1	1	NA
GM19102	2	NM_001025107.2	ADAR	14_13_12	14->12->13	0.736842105263158	1	0.0440649231421495	1	1	NA
GM19102	1	NM_001025107.2	ADAR	14_13_12	14->13->12	0.168	2	0.0440649231421495	1	1	NA
GM19102	2	NM_001025107.2	ADAR	14_13_12	14->13->12	0.147368421052632	2	0.0440649231421495	1	1	NA
GM19102	1	NM_001025107.2	ADAR	14_13_12	12->14->13	0.072	3	0.0440649231421495	1	1	NA
GM19102	2	NM_001025107.2	ADAR	14_13_12	12->14->13	0.105263157894737	3	0.0440649231421495	1	1	NA
GM19102	1	NM_001025107.2	ADAR	14_13_12	12->13->14	0.004	4	0.0440649231421495	1	1	NA
GM19102	2	NM_001025107.2	ADAR	14_13_12	12->13->14	0.0105263157894736	4	0.0440649231421495	1	1	NA
GM19223	1	NM_001025107.2	ADAR	14_13_12	14->12->13	0.829787234042553	1	0.0846956753165868	1	1	NA
GM19223	2	NM_001025107.2	ADAR	14_13_12	14->12->13	0.816786079836233	1	0.0846956753165868	1	1	NA
GM19223	1	NM_001025107.2	ADAR	14_13_12	12->14->13	0.138297872340426	2	0.0846956753165868	1	1	NA
GM19223	2	NM_001025107.2	ADAR	14_13_12	14->13->12	0.097236438075742	2	0.0846956753165868	1	1	NA
GM19223	1	NM_001025107.2	ADAR	14_13_12	14->13->12	0.0319148936170212	3	0.0846956753165868	1	1	NA
GM19223	2	NM_001025107.2	ADAR	14_13_12	12->14->13	0.0859774820880245	3	0.0846956753165868	1	1	NA
GM19144	1	NM_001025107.2	ADAR	14_13_12	14->12->13	0.731679819616685	1	0.185164917946261	1	0.303575824295731	NA
GM19144	2	NM_001025107.2	ADAR	14_13_12	14->12->13	0.854166666666667	1	0.185164917946261	1	0.303575824295731	NA
GM19144	1	NM_001025107.2	ADAR	14_13_12	14->13->12	0.199549041713641	2	0.185164917946261	1	0.303575824295731	NA
GM19144	2	NM_001025107.2	ADAR	14_13_12	12->14->13	0.0833333333333333	2	0.185164917946261	1	0.303575824295731	NA
GM19144	1	NM_001025107.2	ADAR	14_13_12	12->14->13	0.0620067643742953	3	0.185164917946261	1	0.303575824295731	NA
GM19144	2	NM_001025107.2	ADAR	14_13_12	14->13->12	0.0625	3	0.185164917946261	1	0.303575824295731	NA
GM19144	1	NM_001025107.2	ADAR	14_13_12	13->14->12	0.0067643742953776	4	0.185164917946261	1	0.303575824295731	NA
GM19209	1	NM_001025107.2	ADAR	14_13_12	14->12->13	0.820603907637656	1	0.0192986835209079	1	1	NA
GM19209	2	NM_001025107.2	ADAR	14_13_12	14->12->13	0.833357421592716	1	0.0192986835209079	1	1	NA
GM19209	1	NM_001025107.2	ADAR	14_13_12	14->13->12	0.1398756660746	2	0.0192986835209079	1	1	NA
GM19209	2	NM_001025107.2	ADAR	14_13_12	14->13->12	0.12545165486342	2	0.0192986835209079	1	1	NA
GM19209	1	NM_001025107.2	ADAR	14_13_12	12->14->13	0.039076376554174	3	0.0192986835209079	1	1	NA
GM19209	2	NM_001025107.2	ADAR	14_13_12	12->14->13	0.0403237462060991	3	0.0192986835209079	1	1	NA
GM19209	1	NM_001025107.2	ADAR	14_13_12	12->13->14	0.0004440497335701	4	0.0192986835209079	1	1	NA
GM19209	2	NM_001025107.2	ADAR	14_13_12	12->13->14	0.0008671773377655	4	0.0192986835209079	1	1	NA
GM18853	1	NM_174922.4	ADCK5	10_11_12	12->10->11	0.576779026217228	1	0.12909351301503	1	1	NA
GM18853	2	NM_174922.4	ADCK5	10_11_12	12->10->11	0.523809523809524	1	0.12909351301503	1	1	NA
GM18853	1	NM_174922.4	ADCK5	10_11_12	12->11->10	0.370786516853932	2	0.12909351301503	1	1	NA
GM18853	2	NM_174922.4	ADCK5	10_11_12	12->11->10	0.476190476190476	2	0.12909351301503	1	1	NA
GM18853	1	NM_174922.4	ADCK5	10_11_12	10->12->11	0.0524344569288389	3	0.12909351301503	1	1	NA
GM18853	1	NM_174922.4	ADCK5	7_8_9	7->9->8	0.772952171522815	1	0.32899151787698	0.367988970643805	1	NA
GM18853	2	NM_174922.4	ADCK5	7_8_9	7->9->8	0.55078125	1	0.32899151787698	0.367988970643805	1	NA
GM18853	1	NM_174922.4	ADCK5	7_8_9	9->7->8	0.125343595382078	2	0.32899151787698	0.367988970643805	1	NA
GM18853	2	NM_174922.4	ADCK5	7_8_9	9->7->8	0.3671875	2	0.32899151787698	0.367988970643805	1	NA
GM18853	1	NM_174922.4	ADCK5	7_8_9	7->8->9	0.101704233095107	3	0.32899151787698	0.367988970643805	1	NA
GM18853	2	NM_174922.4	ADCK5	7_8_9	7->8->9	0.08203125	3	0.32899151787698	0.367988970643805	1	NA
GM19152	1	NM_174922.4	ADCK5	7_8_9	7->9->8	0.730434782608696	1	0.125813139689038	1	1	NA
GM19152	2	NM_174922.4	ADCK5	7_8_9	7->9->8	0.639344262295082	1	0.125813139689038	1	1	NA
GM19152	1	NM_174922.4	ADCK5	7_8_9	9->7->8	0.208695652173913	2	0.125813139689038	1	1	NA
GM19152	2	NM_174922.4	ADCK5	7_8_9	9->7->8	0.213114754098361	2	0.125813139689038	1	1	NA
GM19152	1	NM_174922.4	ADCK5	7_8_9	7->8->9	0.0608695652173913	3	0.125813139689038	1	1	NA
GM19152	2	NM_174922.4	ADCK5	7_8_9	7->8->9	0.147540983606557	3	0.125813139689038	1	1	NA
GM18853	1	NM_174922.4	ADCK5	8_9_10	10->9->8	0.657071339173968	1	0.266385094505634	1	1	NA
GM18853	2	NM_174922.4	ADCK5	8_9_10	10->9->8	0.461780104712042	1	0.266385094505634	1	1	NA
GM18853	1	NM_174922.4	ADCK5	8_9_10	9->10->8	0.262828535669587	2	0.266385094505634	1	1	NA
GM18853	2	NM_174922.4	ADCK5	8_9_10	9->10->8	0.436125654450262	2	0.266385094505634	1	1	NA
GM18853	1	NM_174922.4	ADCK5	8_9_10	10->8->9	0.0750938673341677	3	0.266385094505634	1	1	NA
GM18853	2	NM_174922.4	ADCK5	8_9_10	10->8->9	0.0471204188481675	3	0.266385094505634	1	1	NA
GM18853	1	NM_174922.4	ADCK5	8_9_10	8->10->9	0.0050062578222778	4	0.266385094505634	1	1	NA
GM18853	2	NM_174922.4	ADCK5	8_9_10	9->8->10	0.0445026178010471	4	0.266385094505634	1	1	NA
GM18853	2	NM_174922.4	ADCK5	8_9_10	8->9->10	0.0052356020942408	5	0.266385094505634	1	1	NA
GM18853	2	NM_174922.4	ADCK5	8_9_10	8->10->9	0.0052356020942408	6	0.266385094505634	1	1	NA
GM18853	1	NM_174922.4	ADCK5	9_10_11	10->11->9	0.482529118136439	1	0.35432298591532	1	1	NA
GM18853	2	NM_174922.4	ADCK5	9_10_11	9->10->11	0.243037974683544	1	0.35432298591532	1	1	NA
GM18853	1	NM_174922.4	ADCK5	9_10_11	11->10->9	0.24126455906822	2	0.35432298591532	1	1	NA
GM18853	2	NM_174922.4	ADCK5	9_10_11	9->11->10	0.243037974683544	2	0.35432298591532	1	1	NA
GM18853	1	NM_174922.4	ADCK5	9_10_11	9->10->11	0.119800332778702	3	0.35432298591532	1	1	NA
GM18853	2	NM_174922.4	ADCK5	9_10_11	10->11->9	0.232911392405063	3	0.35432298591532	1	1	NA
GM18853	1	NM_174922.4	ADCK5	9_10_11	10->9->11	0.0998336106489184	4	0.35432298591532	1	1	NA
GM18853	2	NM_174922.4	ADCK5	9_10_11	11->10->9	0.174683544303797	4	0.35432298591532	1	1	NA
GM18853	1	NM_174922.4	ADCK5	9_10_11	9->11->10	0.0399334442595673	5	0.35432298591532	1	1	NA
GM18853	2	NM_174922.4	ADCK5	9_10_11	10->9->11	0.060759493670886	5	0.35432298591532	1	1	NA
GM18853	1	NM_174922.4	ADCK5	9_10_11	11->9->10	0.016638935108153	6	0.35432298591532	1	1	NA
GM18853	2	NM_174922.4	ADCK5	9_10_11	11->9->10	0.0455696202531645	6	0.35432298591532	1	1	NA
GM19152	1	NM_001320613.1	ADCY3	21_20_19	19->20->21	0.916666666666667	1	0.426077163022663	1	1	NA
GM19152	2	NM_001320613.1	ADCY3	21_20_19	19->20->21	0.615384615384615	1	0.426077163022663	1	1	NA
GM19152	1	NM_001320613.1	ADCY3	21_20_19	20->19->21	0.0833333333333333	2	0.426077163022663	1	1	NA
GM19152	2	NM_001320613.1	ADCY3	21_20_19	20->19->21	0.384615384615385	2	0.426077163022663	1	1	NA
GM19152	1	NM_001114.4	ADCY7	13_14_15	14->13->15	0.31578947368421	1	0.600720278008493	0.372473944585709	0.664760166457528	NA
GM19152	2	NM_001114.4	ADCY7	13_14_15	14->15->13	0.826086956521739	1	0.600720278008493	0.372473944585709	0.664760166457528	NA
GM19152	1	NM_001114.4	ADCY7	13_14_15	14->15->13	0.31578947368421	2	0.600720278008493	0.372473944585709	0.664760166457528	NA
GM19152	2	NM_001114.4	ADCY7	13_14_15	14->13->15	0.173913043478261	2	0.600720278008493	0.372473944585709	0.664760166457528	NA
GM19152	1	NM_001114.4	ADCY7	13_14_15	15->14->13	0.263157894736842	3	0.600720278008493	0.372473944585709	0.664760166457528	NA
GM19152	1	NM_001114.4	ADCY7	13_14_15	13->14->15	0.105263157894737	4	0.600720278008493	0.372473944585709	0.664760166457528	NA
GM18501	1	NM_031284.4	ADPGK	6_5_4	6->5->4	0.8	1	0.0707106781186548	1	1	NA
GM18501	2	NM_031284.4	ADPGK	6_5_4	6->5->4	0.75	1	0.0707106781186548	1	1	NA
GM18501	1	NM_031284.4	ADPGK	6_5_4	5->6->4	0.2	2	0.0707106781186548	1	1	NA
GM18501	2	NM_031284.4	ADPGK	6_5_4	5->6->4	0.25	2	0.0707106781186548	1	1	NA
GM19144	1	NM_031284.4	ADPGK	6_5_4	5->6->4	0.571428571428571	1	0.493852355114414	0.895377040914922	1	NA
GM19144	2	NM_031284.4	ADPGK	6_5_4	6->5->4	0.777777777777778	1	0.493852355114414	0.895377040914922	1	NA
GM19144	1	NM_031284.4	ADPGK	6_5_4	6->5->4	0.428571428571428	2	0.493852355114414	0.895377040914922	1	NA
GM19144	2	NM_031284.4	ADPGK	6_5_4	5->6->4	0.222222222222222	2	0.493852355114414	0.895377040914922	1	NA
GM19152	1	NM_007002.3	ADRM1	1_2_3	1->2->3	0.623376623376623	1	0.746624181536309	1	0.19051292670486	NA
GM19152	2	NM_007002.3	ADRM1	1_2_3	1->3->2	0.780669144981412	1	0.746624181536309	1	0.19051292670486	NA
GM19152	1	NM_007002.3	ADRM1	1_2_3	1->3->2	0.207792207792208	2	0.746624181536309	1	0.19051292670486	NA
GM19152	2	NM_007002.3	ADRM1	1_2_3	1->2->3	0.156133828996283	2	0.746624181536309	1	0.19051292670486	NA
GM19152	1	NM_007002.3	ADRM1	1_2_3	2->1->3	0.0779220779220779	3	0.746624181536309	1	0.19051292670486	NA
GM19152	2	NM_007002.3	ADRM1	1_2_3	3->1->2	0.0557620817843866	3	0.746624181536309	1	0.19051292670486	NA
GM19152	1	NM_007002.3	ADRM1	1_2_3	2->3->1	0.0519480519480519	4	0.746624181536309	1	0.19051292670486	NA
GM19152	2	NM_007002.3	ADRM1	1_2_3	3->2->1	0.0074349442379182	4	0.746624181536309	1	0.19051292670486	NA
GM19152	1	NM_007002.3	ADRM1	1_2_3	3->2->1	0.0259740259740259	5	0.746624181536309	1	0.19051292670486	NA
GM19152	1	NM_007002.3	ADRM1	1_2_3	3->1->2	0.0129870129870129	6	0.746624181536309	1	0.19051292670486	NA
GM19152	1	NM_175573.2	ADRM1	1_2_3	1->2->3	0.623376623376623	1	0.746624181536309	1	0.19051292670486	NA
GM19152	2	NM_175573.2	ADRM1	1_2_3	1->3->2	0.780669144981412	1	0.746624181536309	1	0.19051292670486	NA
GM19152	1	NM_175573.2	ADRM1	1_2_3	1->3->2	0.207792207792208	2	0.746624181536309	1	0.19051292670486	NA
GM19152	2	NM_175573.2	ADRM1	1_2_3	1->2->3	0.156133828996283	2	0.746624181536309	1	0.19051292670486	NA
GM19152	1	NM_175573.2	ADRM1	1_2_3	2->1->3	0.0779220779220779	3	0.746624181536309	1	0.19051292670486	NA
GM19152	2	NM_175573.2	ADRM1	1_2_3	3->1->2	0.0557620817843866	3	0.746624181536309	1	0.19051292670486	NA
GM19152	1	NM_175573.2	ADRM1	1_2_3	2->3->1	0.0519480519480519	4	0.746624181536309	1	0.19051292670486	NA
GM19152	2	NM_175573.2	ADRM1	1_2_3	3->2->1	0.0074349442379182	4	0.746624181536309	1	0.19051292670486	NA
GM19152	1	NM_175573.2	ADRM1	1_2_3	3->2->1	0.0259740259740259	5	0.746624181536309	1	0.19051292670486	NA
GM19152	1	NM_175573.2	ADRM1	1_2_3	3->1->2	0.0129870129870129	6	0.746624181536309	1	0.19051292670486	NA
GM19152	1	NM_007002.3	ADRM1	2_3_4	4->2->3	0.307692307692308	1	0.36288052380005	1	0.871751886649806	NA
GM19152	2	NM_007002.3	ADRM1	2_3_4	3->2->4	0.28448275862069	1	0.36288052380005	1	0.871751886649806	NA
GM19152	1	NM_007002.3	ADRM1	2_3_4	3->2->4	0.2	2	0.36288052380005	1	0.871751886649806	NA
GM19152	2	NM_007002.3	ADRM1	2_3_4	3->4->2	0.258620689655172	2	0.36288052380005	1	0.871751886649806	NA
GM19152	1	NM_007002.3	ADRM1	2_3_4	2->3->4	0.2	3	0.36288052380005	1	0.871751886649806	NA
GM19152	2	NM_007002.3	ADRM1	2_3_4	4->3->2	0.258620689655172	3	0.36288052380005	1	0.871751886649806	NA
GM19152	1	NM_007002.3	ADRM1	2_3_4	4->3->2	0.153846153846154	4	0.36288052380005	1	0.871751886649806	NA
GM19152	2	NM_007002.3	ADRM1	2_3_4	2->3->4	0.0948275862068965	4	0.36288052380005	1	0.871751886649806	NA
GM19152	1	NM_007002.3	ADRM1	2_3_4	2->4->3	0.0923076923076923	5	0.36288052380005	1	0.871751886649806	NA
GM19152	2	NM_007002.3	ADRM1	2_3_4	4->2->3	0.0775862068965517	5	0.36288052380005	1	0.871751886649806	NA
GM19152	1	NM_007002.3	ADRM1	2_3_4	3->4->2	0.0461538461538461	6	0.36288052380005	1	0.871751886649806	NA
GM19152	2	NM_007002.3	ADRM1	2_3_4	2->4->3	0.0258620689655172	6	0.36288052380005	1	0.871751886649806	NA
GM18501	1	NM_001281437.1	ADRM1	3_4_5	5->3->4	0.59375	1	0.141250629483635	1	1	NA
GM18501	2	NM_001281437.1	ADRM1	3_4_5	5->3->4	0.712938005390836	1	0.141250629483635	1	1	NA
GM18501	1	NM_001281437.1	ADRM1	3_4_5	5->4->3	0.25	2	0.141250629483635	1	1	NA
GM18501	2	NM_001281437.1	ADRM1	3_4_5	5->4->3	0.216981132075472	2	0.141250629483635	1	1	NA
GM18501	1	NM_001281437.1	ADRM1	3_4_5	3->5->4	0.129076086956522	3	0.141250629483635	1	1	NA
GM18501	2	NM_001281437.1	ADRM1	3_4_5	3->5->4	0.0619946091644204	3	0.141250629483635	1	1	NA
GM18501	1	NM_001281437.1	ADRM1	3_4_5	3->4->5	0.0135869565217391	4	0.141250629483635	1	1	NA
GM18501	2	NM_001281437.1	ADRM1	3_4_5	3->4->5	0.0080862533692722	4	0.141250629483635	1	1	NA
GM18501	1	NM_001281437.1	ADRM1	3_4_5	4->5->3	0.0108695652173913	5	0.141250629483635	1	1	NA
GM18501	1	NM_001281437.1	ADRM1	3_4_5	4->3->5	0.0027173913043478	6	0.141250629483635	1	1	NA
GM19152	1	NM_001281437.1	ADRM1	3_4_5	5->3->4	0.802292263610315	1	0.105832761096157	1	1	NA
GM19152	2	NM_001281437.1	ADRM1	3_4_5	5->3->4	0.715532286212914	1	0.105832761096157	1	1	NA
GM19152	1	NM_001281437.1	ADRM1	3_4_5	3->5->4	0.140401146131805	2	0.105832761096157	1	1	NA
GM19152	2	NM_001281437.1	ADRM1	3_4_5	3->5->4	0.174520069808028	2	0.105832761096157	1	1	NA
GM19152	1	NM_001281437.1	ADRM1	3_4_5	5->4->3	0.0573065902578796	3	0.105832761096157	1	1	NA
GM19152	2	NM_001281437.1	ADRM1	3_4_5	5->4->3	0.107329842931937	3	0.105832761096157	1	1	NA
GM19152	2	NM_001281437.1	ADRM1	3_4_5	4->5->3	0.0026178010471204	4	0.105832761096157	1	1	NA
GM18501	1	NM_007002.3	ADRM1	3_4_5	3->4->5	0.6	1	0.0299984695048839	1	1	NA
GM18501	2	NM_007002.3	ADRM1	3_4_5	3->4->5	0.606060606060606	1	0.0299984695048839	1	1	NA
GM18501	1	NM_007002.3	ADRM1	3_4_5	4->3->5	0.2	2	0.0299984695048839	1	1	NA
GM18501	2	NM_007002.3	ADRM1	3_4_5	4->3->5	0.181818181818182	2	0.0299984695048839	1	1	NA
GM18501	1	NM_007002.3	ADRM1	3_4_5	3->5->4	0.0999999999999999	3	0.0299984695048839	1	1	NA
GM18501	2	NM_007002.3	ADRM1	3_4_5	3->5->4	0.121212121212121	3	0.0299984695048839	1	1	NA
GM18501	1	NM_007002.3	ADRM1	3_4_5	5->3->4	0.0333333333333333	4	0.0299984695048839	1	1	NA
GM18501	2	NM_007002.3	ADRM1	3_4_5	5->3->4	0.0363636363636363	4	0.0299984695048839	1	1	NA
GM18501	1	NM_007002.3	ADRM1	3_4_5	5->4->3	0.0333333333333333	5	0.0299984695048839	1	1	NA
GM18501	2	NM_007002.3	ADRM1	3_4_5	4->5->3	0.0272727272727272	5	0.0299984695048839	1	1	NA
GM18501	1	NM_007002.3	ADRM1	3_4_5	4->5->3	0.0333333333333333	6	0.0299984695048839	1	1	NA
GM18501	2	NM_007002.3	ADRM1	3_4_5	5->4->3	0.0272727272727272	6	0.0299984695048839	1	1	NA
GM19152	1	NM_007002.3	ADRM1	3_4_5	3->4->5	0.516129032258065	1	0.0783858715028804	1	0.904195589842862	NA
GM19152	2	NM_007002.3	ADRM1	3_4_5	3->4->5	0.503209242618742	1	0.0783858715028804	1	0.904195589842862	NA
GM19152	1	NM_007002.3	ADRM1	3_4_5	4->3->5	0.387096774193548	2	0.0783858715028804	1	0.904195589842862	NA
GM19152	2	NM_007002.3	ADRM1	3_4_5	4->3->5	0.440308087291399	2	0.0783858715028804	1	0.904195589842862	NA
GM19152	1	NM_007002.3	ADRM1	3_4_5	4->5->3	0.0725806451612903	3	0.0783858715028804	1	0.904195589842862	NA
GM19152	2	NM_007002.3	ADRM1	3_4_5	3->5->4	0.0205391527599486	3	0.0783858715028804	1	0.904195589842862	NA
GM19152	1	NM_007002.3	ADRM1	3_4_5	5->4->3	0.0120967741935483	4	0.0783858715028804	1	0.904195589842862	NA
GM19152	2	NM_007002.3	ADRM1	3_4_5	4->5->3	0.017971758664955	4	0.0783858715028804	1	0.904195589842862	NA
GM19152	1	NM_007002.3	ADRM1	3_4_5	3->5->4	0.010752688172043	5	0.0783858715028804	1	0.904195589842862	NA
GM19152	2	NM_007002.3	ADRM1	3_4_5	5->3->4	0.0089858793324775	5	0.0783858715028804	1	0.904195589842862	NA
GM19152	1	NM_007002.3	ADRM1	3_4_5	5->3->4	0.0013440860215053	6	0.0783858715028804	1	0.904195589842862	NA
GM19152	2	NM_007002.3	ADRM1	3_4_5	5->4->3	0.0089858793324775	6	0.0783858715028804	1	0.904195589842862	NA
GM18501	1	NM_001281437.1	ADRM1	4_5_6	6->5->4	0.710801393728223	1	0.215308830076352	1	1	NA
GM18501	2	NM_001281437.1	ADRM1	4_5_6	6->5->4	0.568356374807988	1	0.215308830076352	1	1	NA
GM18501	1	NM_001281437.1	ADRM1	4_5_6	5->6->4	0.236933797909408	2	0.215308830076352	1	1	NA
GM18501	2	NM_001281437.1	ADRM1	4_5_6	5->6->4	0.397849462365591	2	0.215308830076352	1	1	NA
GM18501	1	NM_001281437.1	ADRM1	4_5_6	6->4->5	0.0418118466898954	3	0.215308830076352	1	1	NA
GM18501	2	NM_001281437.1	ADRM1	4_5_6	6->4->5	0.0307219662058371	3	0.215308830076352	1	1	NA
GM18501	1	NM_001281437.1	ADRM1	4_5_6	5->4->6	0.0069686411149825	4	0.215308830076352	1	1	NA
GM18501	2	NM_001281437.1	ADRM1	4_5_6	4->6->5	0.0030721966205837	4	0.215308830076352	1	1	NA
GM18501	1	NM_001281437.1	ADRM1	4_5_6	4->6->5	0.0023228803716608	5	0.215308830076352	1	1	NA
GM18501	1	NM_001281437.1	ADRM1	4_5_6	4->5->6	0.0011614401858304	6	0.215308830076352	1	1	NA
GM19152	1	NM_001281437.1	ADRM1	4_5_6	6->5->4	0.805057471264368	1	0.110849759943037	1	0.952786126316352	NA
GM19152	2	NM_001281437.1	ADRM1	4_5_6	6->5->4	0.882070949185043	1	0.110849759943037	1	0.952786126316352	NA
GM19152	1	NM_001281437.1	ADRM1	4_5_6	5->6->4	0.189425287356322	2	0.110849759943037	1	0.952786126316352	NA
GM19152	2	NM_001281437.1	ADRM1	4_5_6	5->6->4	0.11025886864813	2	0.110849759943037	1	0.952786126316352	NA
GM19152	1	NM_001281437.1	ADRM1	4_5_6	5->4->6	0.0055172413793103	3	0.110849759943037	1	0.952786126316352	NA
GM19152	2	NM_001281437.1	ADRM1	4_5_6	6->4->5	0.0076701821668264	3	0.110849759943037	1	0.952786126316352	NA
GM18501	1	NM_001281437.1	ADRM1	5_6_7	6->5->7	0.508474576271187	1	0.0501838560783607	1	1	NA
GM18501	2	NM_001281437.1	ADRM1	5_6_7	6->5->7	0.540540540540541	1	0.0501838560783607	1	1	NA
GM18501	1	NM_001281437.1	ADRM1	5_6_7	6->7->5	0.254237288135593	2	0.0501838560783607	1	1	NA
GM18501	2	NM_001281437.1	ADRM1	5_6_7	6->7->5	0.216216216216216	2	0.0501838560783607	1	1	NA
GM18501	1	NM_001281437.1	ADRM1	5_6_7	5->6->7	0.203389830508475	3	0.0501838560783607	1	1	NA
GM18501	2	NM_001281437.1	ADRM1	5_6_7	5->6->7	0.202702702702703	3	0.0501838560783607	1	1	NA
GM18501	1	NM_001281437.1	ADRM1	5_6_7	5->7->6	0.0338983050847457	4	0.0501838560783607	1	1	NA
GM18501	2	NM_001281437.1	ADRM1	5_6_7	5->7->6	0.0405405405405405	4	0.0501838560783607	1	1	NA
GM19152	1	NM_001281437.1	ADRM1	5_6_7	6->5->7	0.526315789473684	1	0.20858292548284	1	1	NA
GM19152	2	NM_001281437.1	ADRM1	5_6_7	6->5->7	0.685240963855422	1	0.20858292548284	1	1	NA
GM19152	1	NM_001281437.1	ADRM1	5_6_7	6->7->5	0.228070175438597	2	0.20858292548284	1	1	NA
GM19152	2	NM_001281437.1	ADRM1	5_6_7	6->7->5	0.234939759036145	2	0.20858292548284	1	1	NA
GM19152	1	NM_001281437.1	ADRM1	5_6_7	5->6->7	0.185758513931888	3	0.20858292548284	1	1	NA
GM19152	2	NM_001281437.1	ADRM1	5_6_7	5->6->7	0.0527108433734939	3	0.20858292548284	1	1	NA
GM19152	1	NM_001281437.1	ADRM1	5_6_7	7->6->5	0.0268317853457172	4	0.20858292548284	1	1	NA
GM19152	2	NM_001281437.1	ADRM1	5_6_7	7->6->5	0.0180722891566265	4	0.20858292548284	1	1	NA
GM19152	1	NM_001281437.1	ADRM1	5_6_7	5->7->6	0.0247678018575851	5	0.20858292548284	1	1	NA
GM19152	2	NM_001281437.1	ADRM1	5_6_7	5->7->6	0.0045180722891566	5	0.20858292548284	1	1	NA
GM19152	1	NM_001281437.1	ADRM1	5_6_7	7->5->6	0.0082559339525283	6	0.20858292548284	1	1	NA
GM19152	2	NM_001281437.1	ADRM1	5_6_7	7->5->6	0.0045180722891566	6	0.20858292548284	1	1	NA
GM19152	1	NM_001281437.1	ADRM1	6_7_8	6->8->7	0.5	1	0.200027325808148	1	0.86240630705154	NA
GM19152	2	NM_001281437.1	ADRM1	6_7_8	6->7->8	0.635416666666667	1	0.200027325808148	1	0.86240630705154	NA
GM19152	1	NM_001281437.1	ADRM1	6_7_8	6->7->8	0.5	2	0.200027325808148	1	0.86240630705154	NA
GM19152	2	NM_001281437.1	ADRM1	6_7_8	6->8->7	0.353009259259259	2	0.200027325808148	1	0.86240630705154	NA
GM19152	2	NM_001281437.1	ADRM1	6_7_8	8->7->6	0.005787037037037	3	0.200027325808148	1	0.86240630705154	NA
GM19152	2	NM_001281437.1	ADRM1	6_7_8	8->6->7	0.005787037037037	4	0.200027325808148	1	0.86240630705154	NA
GM19209	1	NM_001130.5	AES	4_3_2	4->2->3	0.724409448818898	1	0.208965627637701	1	1	NA
GM19209	2	NM_001130.5	AES	4_3_2	4->2->3	0.869786368260427	1	0.208965627637701	1	1	NA
GM19209	1	NM_001130.5	AES	4_3_2	2->4->3	0.241469816272966	2	0.208965627637701	1	1	NA
GM19209	2	NM_001130.5	AES	4_3_2	2->4->3	0.091556459816887	2	0.208965627637701	1	1	NA
GM19209	1	NM_001130.5	AES	4_3_2	4->3->2	0.0314960629921259	3	0.208965627637701	1	1	NA
GM19209	2	NM_001130.5	AES	4_3_2	4->3->2	0.0386571719226856	3	0.208965627637701	1	1	NA
GM19209	1	NM_001130.5	AES	4_3_2	3->4->2	0.0026246719160104	4	0.208965627637701	1	1	NA
GM18861	1	NM_001130.5	AES	5_4_3	4->5->3	0.647058823529412	1	0.141281762712544	1	1	NA
GM18861	2	NM_001130.5	AES	5_4_3	4->5->3	0.737967914438503	1	0.141281762712544	1	1	NA
GM18861	1	NM_001130.5	AES	5_4_3	5->4->3	0.352941176470588	2	0.141281762712544	1	1	NA
GM18861	2	NM_001130.5	AES	5_4_3	5->4->3	0.245989304812834	2	0.141281762712544	1	1	NA
GM18861	2	NM_001130.5	AES	5_4_3	4->3->5	0.0160427807486631	3	0.141281762712544	1	1	NA
GM19209	1	NM_001130.5	AES	5_4_3	4->5->3	0.882016036655212	1	0.136560726406291	1	1	NA
GM19209	2	NM_001130.5	AES	5_4_3	4->5->3	0.818050888142103	1	0.136560726406291	1	1	NA
GM19209	1	NM_001130.5	AES	5_4_3	5->4->3	0.0588010691103474	2	0.136560726406291	1	1	NA
GM19209	2	NM_001130.5	AES	5_4_3	5->4->3	0.170427268362938	2	0.136560726406291	1	1	NA
GM19209	1	NM_001130.5	AES	5_4_3	4->3->5	0.0572737686139748	3	0.136560726406291	1	1	NA
GM19209	2	NM_001130.5	AES	5_4_3	4->3->5	0.0115218434949591	3	0.136560726406291	1	1	NA
GM19209	1	NM_001130.5	AES	5_4_3	3->4->5	0.0019091256204658	4	0.136560726406291	1	1	NA
GM19152	1	NM_001130.5	AES	5_4_3	4->5->3	0.654545454545455	1	0.182029824037066	1	1	NA
GM19152	2	NM_001130.5	AES	5_4_3	4->5->3	0.793269230769231	1	0.182029824037066	1	1	NA
GM19152	1	NM_001130.5	AES	5_4_3	4->3->5	0.181818181818182	2	0.182029824037066	1	1	NA
GM19152	2	NM_001130.5	AES	5_4_3	4->3->5	0.158653846153846	2	0.182029824037066	1	1	NA
GM19152	1	NM_001130.5	AES	5_4_3	5->4->3	0.163636363636364	3	0.182029824037066	1	1	NA
GM19152	2	NM_001130.5	AES	5_4_3	5->4->3	0.048076923076923	3	0.182029824037066	1	1	NA
GM18861	1	NM_001130.5	AES	6_5_4	4->5->6	0.402234636871508	1	0.266882031457068	1	1	NA
GM18861	2	NM_001130.5	AES	6_5_4	4->5->6	0.441379310344828	1	0.266882031457068	1	1	NA
GM18861	1	NM_001130.5	AES	6_5_4	5->4->6	0.335195530726257	2	0.266882031457068	1	1	NA
GM18861	2	NM_001130.5	AES	6_5_4	4->6->5	0.275862068965517	2	0.266882031457068	1	1	NA
GM18861	1	NM_001130.5	AES	6_5_4	4->6->5	0.167597765363129	3	0.266882031457068	1	1	NA
GM18861	2	NM_001130.5	AES	6_5_4	5->4->6	0.110344827586207	3	0.266882031457068	1	1	NA
GM18861	1	NM_001130.5	AES	6_5_4	5->6->4	0.0558659217877095	4	0.266882031457068	1	1	NA
GM18861	2	NM_001130.5	AES	6_5_4	6->4->5	0.103448275862069	4	0.266882031457068	1	1	NA
GM18861	1	NM_001130.5	AES	6_5_4	6->4->5	0.0279329608938547	5	0.266882031457068	1	1	NA
GM18861	2	NM_001130.5	AES	6_5_4	6->5->4	0.0413793103448275	5	0.266882031457068	1	1	NA
GM18861	1	NM_001130.5	AES	6_5_4	6->5->4	0.0111731843575419	6	0.266882031457068	1	1	NA
GM18861	2	NM_001130.5	AES	6_5_4	5->6->4	0.0275862068965517	6	0.266882031457068	1	1	NA
GM19209	1	NM_001130.5	AES	6_5_4	4->6->5	0.535433070866142	1	0.370859643275859	1	0.94838135511485	NA
GM19209	2	NM_001130.5	AES	6_5_4	4->5->6	0.494577006507592	1	0.370859643275859	1	0.94838135511485	NA
GM19209	1	NM_001130.5	AES	6_5_4	4->5->6	0.251968503937008	2	0.370859643275859	1	0.94838135511485	NA
GM19209	2	NM_001130.5	AES	6_5_4	4->6->5	0.288503253796095	2	0.370859643275859	1	0.94838135511485	NA
GM19209	1	NM_001130.5	AES	6_5_4	6->4->5	0.18740157480315	3	0.370859643275859	1	0.94838135511485	NA
GM19209	2	NM_001130.5	AES	6_5_4	5->4->6	0.10412147505423	3	0.370859643275859	1	0.94838135511485	NA
GM19209	1	NM_001130.5	AES	6_5_4	5->4->6	0.0125984251968503	4	0.370859643275859	1	0.94838135511485	NA
GM19209	2	NM_001130.5	AES	6_5_4	6->4->5	0.0911062906724511	4	0.370859643275859	1	0.94838135511485	NA
GM19209	1	NM_001130.5	AES	6_5_4	6->5->4	0.011023622047244	5	0.370859643275859	1	0.94838135511485	NA
GM19209	2	NM_001130.5	AES	6_5_4	6->5->4	0.0130151843817787	5	0.370859643275859	1	0.94838135511485	NA
GM19209	1	NM_001130.5	AES	6_5_4	5->6->4	0.0015748031496062	6	0.370859643275859	1	0.94838135511485	NA
GM19209	2	NM_001130.5	AES	6_5_4	5->6->4	0.0086767895878524	6	0.370859643275859	1	0.94838135511485	NA
GM19152	1	NM_001130.5	AES	6_5_4	4->6->5	0.569832402234637	1	0.163613066362578	1	1	NA
GM19152	2	NM_001130.5	AES	6_5_4	4->6->5	0.607495069033531	1	0.163613066362578	1	1	NA
GM19152	1	NM_001130.5	AES	6_5_4	6->4->5	0.189944134078212	2	0.163613066362578	1	1	NA
GM19152	2	NM_001130.5	AES	6_5_4	4->5->6	0.260355029585799	2	0.163613066362578	1	1	NA
GM19152	1	NM_001130.5	AES	6_5_4	4->5->6	0.134078212290503	3	0.163613066362578	1	1	NA
GM19152	2	NM_001130.5	AES	6_5_4	6->4->5	0.110453648915187	3	0.163613066362578	1	1	NA
GM19152	1	NM_001130.5	AES	6_5_4	6->5->4	0.0558659217877095	4	0.163613066362578	1	1	NA
GM19152	2	NM_001130.5	AES	6_5_4	5->4->6	0.0118343195266272	4	0.163613066362578	1	1	NA
GM19152	1	NM_001130.5	AES	6_5_4	5->6->4	0.0279329608938547	5	0.163613066362578	1	1	NA
GM19152	2	NM_001130.5	AES	6_5_4	6->5->4	0.0078895463510848	5	0.163613066362578	1	1	NA
GM19152	1	NM_001130.5	AES	6_5_4	5->4->6	0.0223463687150838	6	0.163613066362578	1	1	NA
GM19152	2	NM_001130.5	AES	6_5_4	5->6->4	0.0019723865877712	6	0.163613066362578	1	1	NA
GM18861	1	NM_198970.1	AES	6_5_4	4->5->6	0.402234636871508	1	0.266882031457068	1	1	NA
GM18861	2	NM_198970.1	AES	6_5_4	4->5->6	0.441379310344828	1	0.266882031457068	1	1	NA
GM18861	1	NM_198970.1	AES	6_5_4	5->4->6	0.335195530726257	2	0.266882031457068	1	1	NA
GM18861	2	NM_198970.1	AES	6_5_4	4->6->5	0.275862068965517	2	0.266882031457068	1	1	NA
GM18861	1	NM_198970.1	AES	6_5_4	4->6->5	0.167597765363129	3	0.266882031457068	1	1	NA
GM18861	2	NM_198970.1	AES	6_5_4	5->4->6	0.110344827586207	3	0.266882031457068	1	1	NA
GM18861	1	NM_198970.1	AES	6_5_4	5->6->4	0.0558659217877095	4	0.266882031457068	1	1	NA
GM18861	2	NM_198970.1	AES	6_5_4	6->4->5	0.103448275862069	4	0.266882031457068	1	1	NA
GM18861	1	NM_198970.1	AES	6_5_4	6->4->5	0.0279329608938547	5	0.266882031457068	1	1	NA
GM18861	2	NM_198970.1	AES	6_5_4	6->5->4	0.0413793103448275	5	0.266882031457068	1	1	NA
GM18861	1	NM_198970.1	AES	6_5_4	6->5->4	0.0111731843575419	6	0.266882031457068	1	1	NA
GM18861	2	NM_198970.1	AES	6_5_4	5->6->4	0.0275862068965517	6	0.266882031457068	1	1	NA
GM19209	1	NM_198970.1	AES	6_5_4	4->6->5	0.535433070866142	1	0.370859643275859	1	0.94838135511485	NA
GM19209	2	NM_198970.1	AES	6_5_4	4->5->6	0.494577006507592	1	0.370859643275859	1	0.94838135511485	NA
GM19209	1	NM_198970.1	AES	6_5_4	4->5->6	0.251968503937008	2	0.370859643275859	1	0.94838135511485	NA
GM19209	2	NM_198970.1	AES	6_5_4	4->6->5	0.288503253796095	2	0.370859643275859	1	0.94838135511485	NA
GM19209	1	NM_198970.1	AES	6_5_4	6->4->5	0.18740157480315	3	0.370859643275859	1	0.94838135511485	NA
GM19209	2	NM_198970.1	AES	6_5_4	5->4->6	0.10412147505423	3	0.370859643275859	1	0.94838135511485	NA
GM19209	1	NM_198970.1	AES	6_5_4	5->4->6	0.0125984251968503	4	0.370859643275859	1	0.94838135511485	NA
GM19209	2	NM_198970.1	AES	6_5_4	6->4->5	0.0911062906724511	4	0.370859643275859	1	0.94838135511485	NA
GM19209	1	NM_198970.1	AES	6_5_4	6->5->4	0.011023622047244	5	0.370859643275859	1	0.94838135511485	NA
GM19209	2	NM_198970.1	AES	6_5_4	6->5->4	0.0130151843817787	5	0.370859643275859	1	0.94838135511485	NA
GM19209	1	NM_198970.1	AES	6_5_4	5->6->4	0.0015748031496062	6	0.370859643275859	1	0.94838135511485	NA
GM19209	2	NM_198970.1	AES	6_5_4	5->6->4	0.0086767895878524	6	0.370859643275859	1	0.94838135511485	NA
GM19152	1	NM_198970.1	AES	6_5_4	4->6->5	0.569832402234637	1	0.163613066362578	1	1	NA
GM19152	2	NM_198970.1	AES	6_5_4	4->6->5	0.607495069033531	1	0.163613066362578	1	1	NA
GM19152	1	NM_198970.1	AES	6_5_4	6->4->5	0.189944134078212	2	0.163613066362578	1	1	NA
GM19152	2	NM_198970.1	AES	6_5_4	4->5->6	0.260355029585799	2	0.163613066362578	1	1	NA
GM19152	1	NM_198970.1	AES	6_5_4	4->5->6	0.134078212290503	3	0.163613066362578	1	1	NA
GM19152	2	NM_198970.1	AES	6_5_4	6->4->5	0.110453648915187	3	0.163613066362578	1	1	NA
GM19152	1	NM_198970.1	AES	6_5_4	6->5->4	0.0558659217877095	4	0.163613066362578	1	1	NA
GM19152	2	NM_198970.1	AES	6_5_4	5->4->6	0.0118343195266272	4	0.163613066362578	1	1	NA
GM19152	1	NM_198970.1	AES	6_5_4	5->6->4	0.0279329608938547	5	0.163613066362578	1	1	NA
GM19152	2	NM_198970.1	AES	6_5_4	6->5->4	0.0078895463510848	5	0.163613066362578	1	1	NA
GM19152	1	NM_198970.1	AES	6_5_4	5->4->6	0.0223463687150838	6	0.163613066362578	1	1	NA
GM19152	2	NM_198970.1	AES	6_5_4	5->6->4	0.0019723865877712	6	0.163613066362578	1	1	NA
GM18853	1	NM_001136.4	AGER	4_3_2	4->3->2	0.558080808080808	1	0.227989796003835	1	1	NA
GM18853	2	NM_001136.4	AGER	4_3_2	4->3->2	0.700934579439252	1	0.227989796003835	1	1	NA
GM18853	1	NM_001136.4	AGER	4_3_2	4->2->3	0.386363636363636	2	0.227989796003835	1	1	NA
GM18853	2	NM_001136.4	AGER	4_3_2	4->2->3	0.210280373831776	2	0.227989796003835	1	1	NA
GM18853	1	NM_001136.4	AGER	4_3_2	3->4->2	0.0328282828282828	3	0.227989796003835	1	1	NA
GM18853	2	NM_001136.4	AGER	4_3_2	3->4->2	0.0467289719626168	3	0.227989796003835	1	1	NA
GM18853	1	NM_001136.4	AGER	4_3_2	2->4->3	0.0227272727272727	4	0.227989796003835	1	1	NA
GM18853	2	NM_001136.4	AGER	4_3_2	2->4->3	0.0420560747663551	4	0.227989796003835	1	1	NA
GM19209	1	NM_001136.4	AGER	4_3_2	4->3->2	0.628571428571429	1	0.284487231001984	1	0.871751886649806	NA
GM19209	2	NM_001136.4	AGER	4_3_2	4->3->2	0.805869074492099	1	0.284487231001984	1	0.871751886649806	NA
GM19209	1	NM_001136.4	AGER	4_3_2	4->2->3	0.295798319327731	2	0.284487231001984	1	0.871751886649806	NA
GM19209	2	NM_001136.4	AGER	4_3_2	3->4->2	0.0948081264108352	2	0.284487231001984	1	0.871751886649806	NA
GM19209	1	NM_001136.4	AGER	4_3_2	3->4->2	0.0571428571428571	3	0.284487231001984	1	0.871751886649806	NA
GM19209	2	NM_001136.4	AGER	4_3_2	4->2->3	0.0767494356659142	3	0.284487231001984	1	0.871751886649806	NA
GM19209	1	NM_001136.4	AGER	4_3_2	2->4->3	0.0134453781512605	4	0.284487231001984	1	0.871751886649806	NA
GM19209	2	NM_001136.4	AGER	4_3_2	2->4->3	0.0225733634311512	4	0.284487231001984	1	0.871751886649806	NA
GM19209	1	NM_001136.4	AGER	4_3_2	3->2->4	0.0033613445378151	5	0.284487231001984	1	0.871751886649806	NA
GM19209	1	NM_001136.4	AGER	4_3_2	2->3->4	0.0016806722689075	6	0.284487231001984	1	0.871751886649806	NA
GM18853	1	NM_001136.4	AGER	5_4_3	5->4->3	0.619718309859155	1	0.1164660302046	1	1	NA
GM18853	2	NM_001136.4	AGER	5_4_3	5->4->3	0.562814070351759	1	0.1164660302046	1	1	NA
GM18853	1	NM_001136.4	AGER	5_4_3	4->5->3	0.309859154929577	2	0.1164660302046	1	1	NA
GM18853	2	NM_001136.4	AGER	5_4_3	4->5->3	0.402010050251256	2	0.1164660302046	1	1	NA
GM18853	1	NM_001136.4	AGER	5_4_3	4->3->5	0.0422535211267605	3	0.1164660302046	1	1	NA
GM18853	2	NM_001136.4	AGER	5_4_3	5->3->4	0.0351758793969849	3	0.1164660302046	1	1	NA
GM18853	1	NM_001136.4	AGER	5_4_3	5->3->4	0.028169014084507	4	0.1164660302046	1	1	NA
GM19209	1	NM_001136.4	AGER	5_4_3	5->4->3	0.747774480712166	1	0.140326069409121	1	1	NA
GM19209	2	NM_001136.4	AGER	5_4_3	5->4->3	0.641025641025641	1	0.140326069409121	1	1	NA
GM19209	1	NM_001136.4	AGER	5_4_3	4->5->3	0.166172106824926	2	0.140326069409121	1	1	NA
GM19209	2	NM_001136.4	AGER	5_4_3	4->5->3	0.256410256410256	2	0.140326069409121	1	1	NA
GM19209	1	NM_001136.4	AGER	5_4_3	5->3->4	0.0801186943620178	3	0.140326069409121	1	1	NA
GM19209	2	NM_001136.4	AGER	5_4_3	5->3->4	0.0854700854700854	3	0.140326069409121	1	1	NA
GM19209	1	NM_001136.4	AGER	5_4_3	4->3->5	0.0059347181008902	4	0.140326069409121	1	1	NA
GM19209	2	NM_001136.4	AGER	5_4_3	4->3->5	0.017094017094017	4	0.140326069409121	1	1	NA
GM19209	1	NM_001136.4	AGER	6_5_4	5->4->6	0.62890625	1	0.224108794353636	1	1	NA
GM19209	2	NM_001136.4	AGER	6_5_4	5->4->6	0.492592592592593	1	0.224108794353636	1	1	NA
GM19209	1	NM_001136.4	AGER	6_5_4	4->5->6	0.1796875	2	0.224108794353636	1	1	NA
GM19209	2	NM_001136.4	AGER	6_5_4	4->5->6	0.351851851851852	2	0.224108794353636	1	1	NA
GM19209	1	NM_001136.4	AGER	6_5_4	5->6->4	0.13671875	3	0.224108794353636	1	1	NA
GM19209	2	NM_001136.4	AGER	6_5_4	5->6->4	0.155555555555556	3	0.224108794353636	1	1	NA
GM19209	1	NM_001136.4	AGER	6_5_4	6->5->4	0.0390625	4	0.224108794353636	1	1	NA
GM19209	1	NM_001136.4	AGER	6_5_4	4->6->5	0.0078125	5	0.224108794353636	1	1	NA
GM19209	1	NM_001136.4	AGER	6_5_4	6->4->5	0.0078125	6	0.224108794353636	1	1	NA
GM18853	1	NM_001136.4	AGER	7_6_5	7->5->6	0.771144278606965	1	0.178686507621702	1	1	NA
GM18853	2	NM_001136.4	AGER	7_6_5	7->5->6	0.639004149377593	1	0.178686507621702	1	1	NA
GM18853	1	NM_001136.4	AGER	7_6_5	5->7->6	0.154228855721393	2	0.178686507621702	1	1	NA
GM18853	2	NM_001136.4	AGER	7_6_5	5->7->6	0.273858921161826	2	0.178686507621702	1	1	NA
GM18853	1	NM_001136.4	AGER	7_6_5	7->6->5	0.0746268656716418	3	0.178686507621702	1	1	NA
GM18853	2	NM_001136.4	AGER	7_6_5	7->6->5	0.0871369294605809	3	0.178686507621702	1	1	NA
GM18510	1	NM_001305275.1	AGRN	17_18_19	18->17->19	0.894736842105263	1	0.223296878269436	1	1	NA
GM18510	2	NM_001305275.1	AGRN	17_18_19	18->17->19	0.736842105263158	1	0.223296878269436	1	1	NA
GM18510	1	NM_001305275.1	AGRN	17_18_19	18->19->17	0.105263157894737	2	0.223296878269436	1	1	NA
GM18510	2	NM_001305275.1	AGRN	17_18_19	18->19->17	0.263157894736842	2	0.223296878269436	1	1	NA
GM19152	1	NM_198576.3	AGRN	31_32_33	32->31->33	0.502415458937198	1	0.214463265180561	1	1	NA
GM19152	2	NM_198576.3	AGRN	31_32_33	32->31->33	0.408163265306122	1	0.214463265180561	1	1	NA
GM19152	1	NM_198576.3	AGRN	31_32_33	31->32->33	0.251207729468599	2	0.214463265180561	1	1	NA
GM19152	2	NM_198576.3	AGRN	31_32_33	32->33->31	0.326530612244898	2	0.214463265180561	1	1	NA
GM19152	1	NM_198576.3	AGRN	31_32_33	32->33->31	0.154589371980676	3	0.214463265180561	1	1	NA
GM19152	2	NM_198576.3	AGRN	31_32_33	31->32->33	0.204081632653061	3	0.214463265180561	1	1	NA
GM19152	1	NM_198576.3	AGRN	31_32_33	33->32->31	0.0579710144927536	4	0.214463265180561	1	1	NA
GM19152	2	NM_198576.3	AGRN	31_32_33	31->33->32	0.0612244897959183	4	0.214463265180561	1	1	NA
GM19152	1	NM_198576.3	AGRN	31_32_33	31->33->32	0.0193236714975845	5	0.214463265180561	1	1	NA
GM19152	1	NM_198576.3	AGRN	31_32_33	33->31->32	0.0144927536231884	6	0.214463265180561	1	1	NA
GM19152	1	NM_198576.3	AGRN	32_33_34	32->34->33	0.661016949152542	1	0.0684647754129316	1	1	NA
GM19152	2	NM_198576.3	AGRN	32_33_34	32->34->33	0.697674418604651	1	0.0684647754129316	1	1	NA
GM19152	1	NM_198576.3	AGRN	32_33_34	34->32->33	0.220338983050847	2	0.0684647754129316	1	1	NA
GM19152	2	NM_198576.3	AGRN	32_33_34	34->32->33	0.209302325581395	2	0.0684647754129316	1	1	NA
GM19152	1	NM_198576.3	AGRN	32_33_34	34->33->32	0.0677966101694915	3	0.0684647754129316	1	1	NA
GM19152	2	NM_198576.3	AGRN	32_33_34	34->33->32	0.0930232558139534	3	0.0684647754129316	1	1	NA
GM19152	1	NM_198576.3	AGRN	32_33_34	32->33->34	0.0508474576271186	4	0.0684647754129316	1	1	NA
GM18510	1	NM_198576.3	AGRN	33_34_35	34->35->33	0.514018691588785	1	0.315464134067989	1	1	NA
GM18510	2	NM_198576.3	AGRN	33_34_35	34->35->33	0.485651214128035	1	0.315464134067989	1	1	NA
GM18510	1	NM_198576.3	AGRN	33_34_35	35->34->33	0.280373831775701	2	0.315464134067989	1	1	NA
GM18510	2	NM_198576.3	AGRN	33_34_35	34->33->35	0.441501103752759	2	0.315464134067989	1	1	NA
GM18510	1	NM_198576.3	AGRN	33_34_35	34->33->35	0.205607476635514	3	0.315464134067989	1	1	NA
GM18510	2	NM_198576.3	AGRN	33_34_35	35->34->33	0.0728476821192053	3	0.315464134067989	1	1	NA
GM18853	1	NM_198576.3	AGRN	33_34_35	34->35->33	0.479166666666667	1	0.647302233368242	0.0720485060247399	1	NA
GM18853	2	NM_198576.3	AGRN	33_34_35	35->34->33	0.659420289855073	1	0.647302233368242	0.0720485060247399	1	NA
GM18853	1	NM_198576.3	AGRN	33_34_35	34->33->35	0.359375	2	0.647302233368242	0.0720485060247399	1	NA
GM18853	2	NM_198576.3	AGRN	33_34_35	34->35->33	0.235507246376812	2	0.647302233368242	0.0720485060247399	1	NA
GM18853	1	NM_198576.3	AGRN	33_34_35	35->34->33	0.145833333333333	3	0.647302233368242	0.0720485060247399	1	NA
GM18853	2	NM_198576.3	AGRN	33_34_35	34->33->35	0.0543478260869565	3	0.647302233368242	0.0720485060247399	1	NA
GM18853	1	NM_198576.3	AGRN	33_34_35	33->34->35	0.0156249999999999	4	0.647302233368242	0.0720485060247399	1	NA
GM18853	2	NM_198576.3	AGRN	33_34_35	35->33->34	0.0507246376811594	4	0.647302233368242	0.0720485060247399	1	NA
GM19209	1	NM_198576.3	AGRN	33_34_35	34->35->33	0.625	1	0.167126461568388	1	1	NA
GM19209	2	NM_198576.3	AGRN	33_34_35	34->35->33	0.521489971346705	1	0.167126461568388	1	1	NA
GM19209	1	NM_198576.3	AGRN	33_34_35	34->33->35	0.3125	2	0.167126461568388	1	1	NA
GM19209	2	NM_198576.3	AGRN	33_34_35	34->33->35	0.441260744985673	2	0.167126461568388	1	1	NA
GM19209	1	NM_198576.3	AGRN	33_34_35	35->34->33	0.0625	3	0.167126461568388	1	1	NA
GM19209	2	NM_198576.3	AGRN	33_34_35	35->34->33	0.0372492836676217	3	0.167126461568388	1	1	NA
GM19152	1	NM_198576.3	AGRN	33_34_35	34->35->33	0.418891170431211	1	0.198344847354017	1	1	NA
GM19152	2	NM_198576.3	AGRN	33_34_35	34->33->35	0.458937198067633	1	0.198344847354017	1	1	NA
GM19152	1	NM_198576.3	AGRN	33_34_35	34->33->35	0.314168377823409	2	0.198344847354017	1	1	NA
GM19152	2	NM_198576.3	AGRN	33_34_35	34->35->33	0.428341384863124	2	0.198344847354017	1	1	NA
GM19152	1	NM_198576.3	AGRN	33_34_35	35->34->33	0.246406570841889	3	0.198344847354017	1	1	NA
GM19152	2	NM_198576.3	AGRN	33_34_35	35->34->33	0.112721417069243	3	0.198344847354017	1	1	NA
GM19152	1	NM_198576.3	AGRN	33_34_35	35->33->34	0.0205338809034907	4	0.198344847354017	1	1	NA
GM18853	1	NM_001242412.1	AHRR	8_9_10	10->9->8	1	1	0.101015254455221	1	1	NA
GM18853	2	NM_001242412.1	AHRR	8_9_10	10->9->8	0.928571428571429	1	0.101015254455221	1	1	NA
GM18853	2	NM_001242412.1	AHRR	8_9_10	9->10->8	0.0714285714285714	2	0.101015254455221	1	1	NA
GM19102	1	NM_001242412.1	AHRR	8_9_10	10->9->8	0.928571428571429	1	0.105259082268172	1	1	NA
GM19102	2	NM_001242412.1	AHRR	8_9_10	10->9->8	0.918918918918919	1	0.105259082268172	1	1	NA
GM19102	1	NM_001242412.1	AHRR	8_9_10	9->10->8	0.0714285714285714	2	0.105259082268172	1	1	NA
GM19102	2	NM_001242412.1	AHRR	8_9_10	10->8->9	0.0765765765765765	2	0.105259082268172	1	1	NA
GM19102	2	NM_001242412.1	AHRR	8_9_10	8->10->9	0.0045045045045045	3	0.105259082268172	1	1	NA
GM19152	1	NM_001302959.1	AIP	3_4_5	3->4->5	0.506775067750677	1	0.246051399712904	1	0.868442354159409	NA
GM19152	2	NM_001302959.1	AIP	3_4_5	3->5->4	0.40990990990991	1	0.246051399712904	1	0.868442354159409	NA
GM19152	1	NM_001302959.1	AIP	3_4_5	3->5->4	0.29810298102981	2	0.246051399712904	1	0.868442354159409	NA
GM19152	2	NM_001302959.1	AIP	3_4_5	3->4->5	0.29954954954955	2	0.246051399712904	1	0.868442354159409	NA
GM19152	1	NM_001302959.1	AIP	3_4_5	5->3->4	0.10840108401084	3	0.246051399712904	1	0.868442354159409	NA
GM19152	2	NM_001302959.1	AIP	3_4_5	5->3->4	0.175675675675676	3	0.246051399712904	1	0.868442354159409	NA
GM19152	1	NM_001302959.1	AIP	3_4_5	4->3->5	0.046070460704607	4	0.246051399712904	1	0.868442354159409	NA
GM19152	2	NM_001302959.1	AIP	3_4_5	5->4->3	0.054054054054054	4	0.246051399712904	1	0.868442354159409	NA
GM19152	1	NM_001302959.1	AIP	3_4_5	5->4->3	0.032520325203252	5	0.246051399712904	1	0.868442354159409	NA
GM19152	2	NM_001302959.1	AIP	3_4_5	4->3->5	0.0427927927927927	5	0.246051399712904	1	0.868442354159409	NA
GM19152	1	NM_001302959.1	AIP	3_4_5	4->5->3	0.008130081300813	6	0.246051399712904	1	0.868442354159409	NA
GM19152	2	NM_001302959.1	AIP	3_4_5	4->5->3	0.018018018018018	6	0.246051399712904	1	0.868442354159409	NA
GM19152	1	NM_001302960.1	AIP	3_4_5	3->4->5	0.506775067750677	1	0.246051399712904	1	0.868442354159409	NA
GM19152	2	NM_001302960.1	AIP	3_4_5	3->5->4	0.40990990990991	1	0.246051399712904	1	0.868442354159409	NA
GM19152	1	NM_001302960.1	AIP	3_4_5	3->5->4	0.29810298102981	2	0.246051399712904	1	0.868442354159409	NA
GM19152	2	NM_001302960.1	AIP	3_4_5	3->4->5	0.29954954954955	2	0.246051399712904	1	0.868442354159409	NA
[truncated: 56,006 more rows]

## Sheet: Table S3
Supplemental Table 3. Allelic splicing order for intron pairs in lymphoblastoid cell lines. For each allele and order, the splicing order score and rank is indicated. Analyzed introns are indicated as intron 1 and intron 2 and are numbered by their position in the transcript. "In_order_allele1" and "in_order_allele2" indicates the fraction of reads in which the upstream intron is removed but not …
cell_line	gene_name	gene	intron1	intron2	total_counts	in_order_allele1	in_order_allele2	delta	pvalue	FDR
GM18501	AAAS	NM_001173466.1	13	12	20	1	0.9	0.1	1	1
GM18501	ABCB6	NM_005689.2	2	1	24	0.692307692307692	0.363636363636364	0.328671328671329	0.217326404245909	1
GM18501	ABCB6	NM_005689.2	4	3	52	0	0.05	-0.05	0.384615384615385	1
GM18501	ABCB6	NM_005689.2	6	5	33	0.8	0.461538461538462	0.338461538461538	0.064549177024391	0.919645668867036
GM18501	ABCB6	NM_005689.2	16	15	29	0.9375	0.846153846153846	0.0913461538461538	0.573070607553366	1
GM18501	ABCB8	NM_001282291.1	3	4	28	0.571428571428571	0.642857142857143	-0.0714285714285715	1	1
GM18501	ABCD4	NM_005050.3	14	13	38	0.0384615384615385	0.333333333333333	-0.294871794871795	0.0272182841842285	0.614964613723484
GM18501	ABCD4	NM_005050.3	15	14	52	0.333333333333333	0.205882352941176	0.127450980392157	0.333772082381215	1
GM18501	ABCD4	NM_005050.3	16	15	46	0.0952380952380952	0.12	-0.0247619047619048	1	1
GM18501	ABCD4	NM_005050.3	18	17	191	0.98876404494382	1	-0.0112359550561798	0.465968586387435	1
GM18501	ABCF3	NM_018358.2	4	5	33	0	0.0666666666666667	-0.0666666666666667	0.454545454545454	1
GM18501	ABCF3	NM_018358.2	5	6	38	0.0952380952380952	0	0.0952380952380952	0.492176386913229	1
GM18501	ABCF3	NM_018358.2	12	13	29	0.166666666666667	0.0909090909090909	0.0757575757575757	1	1
GM18501	ABCF3	NM_018358.2	16	17	29	1	0.947368421052632	0.0526315789473685	1	1
GM18501	ABHD12	NM_001042472.2	12	11	30	1	0.9	0.1	0.333333333333333	1
GM18501	ABR	NM_001092.4	21	20	21	0.3	0.454545454545454	-0.154545454545455	0.659442724458204	1
GM18501	ABT1	NM_013375.3	1	2	34	0	0.0588235294117647	-0.0588235294117647	1	1
GM18501	ACAA1	NM_001607.3	9	8	220	0.045045045045045	0.0275229357798165	0.0175221092652285	0.721557680564266	1
GM18501	ACAD10	NM_001136538.1	20	21	33	1	0.941176470588235	0.0588235294117647	1	1
GM18501	ACADM	NM_000016.5	10	11	31	0.833333333333333	0.947368421052632	-0.114035087719298	0.54349276974416	1
GM18501	ACAP1	NM_014716.3	19	20	33	0.0909090909090909	0.0909090909090909	0	1	1
GM18501	ACAT2	NM_001303253.1	4	5	29	0.0588235294117647	0	0.0588235294117647	1	1
GM18501	ACSL1	NM_001286708.1	14	13	32	0	0.307692307692308	-0.307692307692308	0.0198832035595106	0.50604289683252
GM18501	ACSL1	NM_001286708.1	15	14	23	0.1	0.153846153846154	-0.0538461538461538	1	1
GM18501	ACTB	NM_001101.3	2	1	792	0.199004975124378	0.145516074450085	0.0534889006742935	0.0752349273119821	0.971584688519076
GM18501	ACTG1	NM_001199954.1	3	2	378	0.788888888888889	0.818181818181818	-0.0292929292929294	0.517325069169649	1
GM18501	ACTG1	NM_001199954.1	4	3	461	0.29646017699115	0.217021276595745	0.0794389003954058	0.0550907840060394	0.856069876115759
GM18501	ACTG1	NM_001199954.1	5	4	323	0.158227848101266	0.2	-0.0417721518987342	0.384785881762286	1
GM18501	ACTG1	NM_001614.3	2	1	316	0.406451612903226	0.434782608695652	-0.0283309957924264	0.64916128274286	1
GM18501	ACTR5	NM_024855.3	5	6	40	0.35	0.45	-0.1	0.747527282566215	1
GM18501	ADA	NM_000022.3	4	3	31	0.533333333333333	0.25	0.283333333333333	0.148883622704777	1
GM18501	ADA	NM_000022.3	7	6	126	0.981481481481482	0.986111111111111	-0.00462962962962965	1	1
GM18501	ADA	NM_000022.3	8	7	117	0	0.0151515151515152	-0.0151515151515152	1	1
GM18501	ADA	NM_000022.3	11	10	63	0.967741935483871	1	-0.032258064516129	0.492063492063492	1
GM18501	ADAM8	NM_001109.4	11	10	61	1	0.944444444444444	0.0555555555555556	0.508196721311475	1
GM18501	ADAM8	NM_001109.4	12	11	102	0.135135135135135	0.0461538461538462	0.088981288981289	0.13511807251162	1
GM18501	ADAM8	NM_001109.4	15	14	45	0.142857142857143	0.0833333333333333	0.0595238095238095	0.652108148988467	1
GM18501	ADAM8	NM_001109.4	20	19	61	0.0256410256410256	0	0.0256410256410256	1	1
GM18501	ADCY3	NM_001320613.1	14	13	26	0.0833333333333333	0	0.0833333333333333	0.461538461538462	1
GM18501	ADCY7	NM_001114.4	9	10	35	0.0555555555555556	0	0.0555555555555556	1	1
GM18501	ADCY7	NM_001114.4	13	14	33	0	0.0666666666666667	-0.0666666666666667	0.454545454545454	1
GM18501	ADCY7	NM_001114.4	14	15	25	0.666666666666667	0.615384615384615	0.0512820512820512	1	1
GM18501	ADCY7	NM_001114.4	20	21	119	0	0.0344827586206897	-0.0344827586206897	0.235436547500356	1
GM18501	ADGRE5	NM_001025160.2	15	16	24	0.8	0.857142857142857	-0.057142857142857	1	1
GM18501	ADGRE5	NM_001025160.2	17	18	30	0.857142857142857	0.875	-0.0178571428571429	1	1
GM18501	ADPGK	NM_031284.4	6	5	29	0.1875	0.307692307692308	-0.120192307692308	0.666500083291687	1
GM18501	ADRM1	NM_001281437.1	3	4	66	0.735294117647059	0.78125	-0.0459558823529411	0.77675029999782	1
GM18501	ADRM1	NM_001281437.1	4	5	94	0.0666666666666667	0.0612244897959184	0.0054421768707483	1	1
GM18501	ADRM1	NM_001281437.1	5	6	46	0.259259259259259	0.368421052631579	-0.10916179337232	0.521699805307293	1
GM18501	ADRM1	NM_001281437.1	6	7	46	0.92	0.904761904761905	0.0152380952380953	1	1
GM18501	ADRM1	NM_007002.3	1	2	26	0.857142857142857	1	-0.142857142857143	0.483076923076923	1
GM18501	ADRM1	NM_007002.3	3	4	42	0.681818181818182	0.7	-0.0181818181818182	1	1
GM18501	ADRM1	NM_175573.2	1	2	26	0.857142857142857	1	-0.142857142857143	0.483076923076923	1
GM18501	ADSS	NM_001126.3	5	4	29	0	0.0833333333333333	-0.0833333333333333	0.413793103448276	1
GM18501	AES	NM_001130.5	5	4	38	0.947368421052632	0.894736842105263	0.0526315789473684	1	1
GM18501	AGBL3	NM_178563.3	1	2	25	0.2	0	0.2	0.15	1
GM18501	AGER	NM_001136.4	6	5	25	1	0.833333333333333	0.166666666666667	0.22	1
GM18501	AGER	NM_001136.4	7	6	34	0.0526315789473684	0.133333333333333	-0.0807017543859649	0.571356951871658	1
GM18501	AGER	NM_001136.4	9	8	27	0.923076923076923	1	-0.0769230769230769	0.481481481481482	1
GM18501	AGPAT5	NM_018361.3	6	7	30	0.266666666666667	0.0666666666666667	0.2	0.329501915708812	1
GM18501	AGRN	NM_001305275.1	18	19	38	1	0.888888888888889	0.111111111111111	0.217638691322902	1
GM18501	AIP	NM_001302959.1	3	4	43	0.666666666666667	0.892857142857143	-0.226190476190476	0.103610730771372	1
GM18501	AIP	NM_001302959.1	4	5	66	0.478260869565217	0.511627906976744	-0.0333670374115268	1	1
GM18501	AIP	NM_001302960.1	4	5	66	0.478260869565217	0.511627906976744	-0.0333670374115268	1	1
GM18501	AKAP1	NM_001242902.1	3	4	44	0	0.0526315789473684	-0.0526315789473684	0.431818181818182	1
GM18501	AKAP8	NM_005858.3	4	3	28	1	0.916666666666667	0.0833333333333334	0.428571428571428	1
GM18501	AKR1B1	NM_001628.2	4	3	27	0.928571428571429	0.923076923076923	0.00549450549450547	1	1
GM18501	AKR1B1	NM_001628.2	5	4	32	0	0.0588235294117647	-0.0588235294117647	1	1
GM18501	AKT1	NM_001014431.1	6	5	24	0.0909090909090909	0.153846153846154	-0.0629370629370629	1	1
GM18501	AKT1	NM_001014431.1	7	6	20	0.8	0.9	-0.1	1	1
GM18501	AKT1	NM_001014431.1	8	7	32	0.947368421052632	0.769230769230769	0.178137651821862	0.278781979977753	1
GM18501	AKT1	NM_001014431.1	9	8	54	0.032258064516129	0.0869565217391304	-0.0546984572230014	0.56881954523464	1
GM18501	AKT1	NM_001014431.1	13	12	29	0.0769230769230769	0	0.0769230769230769	0.448275862068966	1
GM18501	ALDOA	NM_000034.3	8	9	27	0.0909090909090909	0.0625	0.0284090909090909	1	1
GM18501	ALG12	NM_024105.3	6	5	24	0.923076923076923	1	-0.0769230769230769	1	1
GM18501	ALG3	NM_001006941.2	5	4	32	0.25	0.25	0	1	1
GM18501	ALG3	NM_001006941.2	6	5	30	0	0.0666666666666667	-0.0666666666666667	1	1
GM18501	ALG3	NM_001006941.2	7	6	43	0.958333333333333	0.894736842105263	0.0635964912280702	0.575074953407341	1
GM18501	ALOX5	NM_000698.4	8	9	81	0.95	0.975609756097561	-0.025609756097561	0.615564932020628	1
GM18501	ALOX5	NM_000698.4	9	10	42	1	0.862068965517241	0.137931034482759	0.292682926829268	1
GM18501	ANKFY1	NM_001257999.1	23	22	20	0.2	0.1	0.1	1	1
GM18501	ANKLE1	NM_152363.5	4	5	24	0.4	0.785714285714286	-0.385714285714286	0.0918023960156145	1
GM18501	ANKLE2	NM_015114.2	9	8	95	0.936708860759494	0.875	0.0617088607594937	0.335194536714816	1
GM18501	ANKRD13D	NM_207354.2	7	8	141	0	0.0147058823529412	-0.0147058823529412	0.482269503546099	1
GM18501	ANKRD13D	NM_207354.2	9	10	34	0.941176470588235	0.941176470588235	0	1	1
GM18501	ANKRD13D	NM_207354.2	10	11	53	0.03125	0	0.03125	1	1
GM18501	ANKRD13D	NM_207354.2	11	12	26	0.9	1	-0.1	0.384615384615385	1
GM18501	ANKRD13D	NM_207354.2	12	13	38	0.4375	0.181818181818182	0.255681818181818	0.147149898049591	1
GM18501	ANXA11	NM_001157.2	7	6	70	0.243243243243243	0.181818181818182	0.0614250614250614	0.57326750780196	1
GM18501	ANXA4	NM_001153.4	8	9	31	0.266666666666667	0.875	-0.608333333333333	0.000965052278614513	0.0581102587861017
GM18501	ANXA6	NM_001155.4	25	24	31	0.583333333333333	0.105263157894737	0.478070175438596	0.0117774859468529	0.373065749018736
GM18501	AP1B1	NM_001127.3	17	16	24	0.846153846153846	0.818181818181818	0.0279720279720279	1	1
GM18501	AP2M1	NM_001025205.1	4	5	32	0.0666666666666667	0	0.0666666666666667	0.46875	1
GM18501	AP2M1	NM_001025205.1	6	7	42	0.125	0.192307692307692	-0.0673076923076923	0.689676839869394	1
GM18501	AP2M1	NM_001025205.1	7	8	30	0.0714285714285714	0.375	-0.303571428571429	0.0859770114942529	1
GM18501	AP2M1	NM_001025205.1	9	10	116	1	0.917808219178082	0.0821917808219178	0.0831073404497917	1
GM18501	AP2M1	NM_001311198.1	7	8	32	0	0.0555555555555556	-0.0555555555555556	1	1
GM18501	AP5Z1	NM_014855.2	3	4	96	0.84375	0.96875	-0.125	0.0392087098840105	0.739865167811288
GM18501	AP5Z1	NM_014855.2	9	10	41	0.210526315789474	0.0454545454545455	0.165071770334928	0.164443993712286	1
GM18501	AP5Z1	NM_014855.2	10	11	48	0.576923076923077	0.681818181818182	-0.104895104895105	0.555017825779325	1
GM18501	AP5Z1	NM_014855.2	11	12	45	0.0476190476190476	0.0833333333333333	-0.0357142857142857	1	1
GM18501	AP5Z1	NM_014855.2	13	14	195	0.981481481481482	1	-0.0185185185185185	0.50325138778747	1
GM18501	AP5Z1	NM_014855.2	15	16	86	0.02	0.0277777777777778	-0.00777777777777778	1	1
GM18501	APBB3	NM_006051.3	11	10	25	0.333333333333333	0.5	-0.166666666666667	0.442219679633867	1
GM18501	APEX1	NM_001244249.1	1	2	57	0.28125	0.4	-0.11875	0.403618957534323	1
GM18501	APEX1	NM_001244249.1	2	3	218	0.00952380952380952	0	0.00952380952380952	0.481651376146789	1
GM18501	APEX1	NM_001244249.1	3	4	57	0.222222222222222	0.233333333333333	-0.0111111111111111	1	1
GM18501	APEX1	NM_001641.3	1	2	57	0.28125	0.4	-0.11875	0.403618957534323	1
GM18501	APEX1	NM_080648.2	1	2	40	0.0416666666666667	0.0625	-0.0208333333333333	1	1
GM18501	APEX1	NM_080649.2	1	2	40	0.0416666666666667	0.0625	-0.0208333333333333	1	1
GM18501	APOL2	NM_030882.3	2	1	47	0	0.0833333333333333	-0.0833333333333333	0.25531914893617	1
GM18501	APRT	NM_000485.2	4	3	63	0.148148148148148	0.472222222222222	-0.324074074074074	0.00796390637223294	0.292799646880445
GM18501	APRT	NM_001030018.1	4	3	49	0.166666666666667	0.68	-0.513333333333333	0.000440890172372083	0.0301692265360732
GM18501	AQR	NM_014691.2	31	30	21	0.5	0.545454545454545	-0.0454545454545454	1	1
GM18501	ARAP1	NM_001040118.2	22	21	44	1	0.961538461538462	0.0384615384615384	1	1
GM18501	ARFGAP2	NM_001242832.1	10	9	73	0.0465116279069767	0	0.0465116279069767	0.509132420091324	1
GM18501	ARFGAP2	NM_001242832.1	12	11	38	1	0.944444444444444	0.0555555555555556	0.473684210526316	1
GM18501	ARFIP2	NM_001242854.1	6	5	27	0.0909090909090909	0	0.0909090909090909	0.407407407407407	1
GM18501	ARFIP2	NM_001242854.1	7	6	35	1	0.95	0.05	1	1
GM18501	ARFRP1	NM_001134758.3	5	4	41	0.428571428571429	0.222222222222222	0.206349206349206	0.277581373943603	1
GM18501	ARFRP1	NM_001267544.2	5	4	41	0.428571428571429	0.222222222222222	0.206349206349206	0.277581373943603	1
GM18501	ARFRP1	NM_001267546.2	6	5	47	0.0555555555555556	0.344827586206897	-0.289272030651341	0.0330748871006953	0.681726453770633
GM18501	ARHGAP45	NM_001258328.2	19	20	30	0.947368421052632	1	-0.0526315789473685	1	1
GM18501	ARHGAP45	NM_001258328.2	20	21	42	0	0.0588235294117647	-0.0588235294117647	0.404761904761905	1
GM18501	ARHGAP9	NM_001080156.2	4	3	25	1	0.933333333333333	0.0666666666666667	1	1
GM18501	ARHGAP9	NM_001080156.2	6	5	34	0.947368421052632	0.933333333333333	0.0140350877192982	1	1
GM18501	ARHGAP9	NM_001080156.2	7	6	25	0	0.0909090909090909	-0.0909090909090909	0.44	1
GM18501	ARHGAP9	NM_001080156.2	10	9	56	0.870967741935484	1	-0.129032258064516	0.12010945029813	1
GM18501	ARHGAP9	NM_001080156.2	11	10	72	0.0263157894736842	0	0.0263157894736842	1	1
GM18501	ARHGAP9	NM_001080156.2	13	12	28	1	0.9	0.1	0.357142857142857	1
GM18501	ARHGAP9	NM_001319850.1	13	12	64	0.973684210526316	1	-0.0263157894736842	1	1
GM18501	ARHGAP9	NM_001319850.1	14	13	80	0	0.0277777777777778	-0.0277777777777778	0.45	1
GM18501	ARHGDIB	NM_001175.6	4	3	39	0.941176470588235	1	-0.0588235294117647	0.435897435897436	1
GM18501	ARHGDIB	NM_001175.6	5	4	41	0.105263157894737	0.0909090909090909	0.0143540669856459	1	1
GM18501	ARHGEF7	NM_001113511.2	17	18	39	0	0.0588235294117647	-0.0588235294117647	0.435897435897436	1
GM18501	ARID5A	NM_001319085.1	1	2	29	0.176470588235294	0.25	-0.0735294117647059	0.669319186560566	1
GM18501	ARID5A	NM_001319092.1	3	4	30	0.923076923076923	1	-0.0769230769230769	0.433333333333333	1
GM18501	ARL14EP	NM_152316.2	2	3	35	0.0434782608695652	0	0.0434782608695652	1	1
GM18501	ARL6IP4	NM_001002251.2	1	2	101	0.91304347826087	0.909090909090909	0.00395256916996045	1	1
GM18501	ARL6IP4	NM_001002251.2	2	3	238	0.00862068965517241	0	0.00862068965517241	0.487394957983193	1
GM18501	ARL6IP4	NM_001002251.2	3	4	61	0.612903225806452	0.833333333333333	-0.220430107526882	0.086013013909009	1
GM18501	ARL6IP4	NM_001002251.2	4	5	184	0.978260869565217	0.967391304347826	0.0108695652173914	1	1
GM18501	ARL6IP4	NM_001002252.2	1	2	103	0.857142857142857	0.925925925925926	-0.0687830687830688	0.343221787705894	1
GM18501	ARL6IP4	NM_018694.3	1	2	101	0.91304347826087	0.909090909090909	0.00395256916996045	1	1
GM18501	ARL6IP4	NM_018694.3	2	3	236	0.00869565217391304	0	0.00869565217391304	0.48728813559322	1
GM18501	ARPC2	NM_005731.3	4	5	73	0.0232558139534884	0	0.0232558139534884	1	1
GM18501	ARPC5	NM_001270439.1	2	1	56	0.0454545454545455	0	0.0454545454545455	0.392857142857143	1
GM18501	ARPC5	NM_005717.3	2	1	57	0.0434782608695652	0	0.0434782608695652	0.403508771929825	1
GM18501	ASAH1	NM_001127505.2	7	6	48	0.222222222222222	0.0666666666666667	0.155555555555556	0.179316045162161	1
GM18501	ASAH1	NM_001127505.2	9	8	45	0	0.0454545454545455	-0.0454545454545455	0.488888888888889	1
GM18501	ASL	NM_000048.3	6	7	70	0.952380952380952	0.964285714285714	-0.011904761904762	1	1
GM18501	ASL	NM_000048.3	7	8	109	0.875	0.844444444444444	0.0305555555555556	0.779088713697356	1
GM18501	ASL	NM_000048.3	12	13	59	0	0.0384615384615385	-0.0384615384615385	0.440677966101695	1
GM18501	ASPM	NM_001206846.1	25	24	84	0.975609756097561	0.976744186046512	-0.00113442994895063	1	1
GM18501	ASPM	NM_001206846.1	26	25	184	0	0.010989010989011	-0.010989010989011	0.494565217391304	1
GM18501	ATAD1	NM_001321967.1	9	8	49	0.037037037037037	0.0454545454545455	-0.00841750841750842	1	1
GM18501	ATAD3A	NM_001170535.1	13	14	67	1	0.903225806451613	0.0967741935483871	0.0938315415927356	1
GM18501	ATAD3B	NM_001317238.1	9	10	43	0	0.0434782608695652	-0.0434782608695652	1	1
GM18501	ATAD3B	NM_001317238.1	10	11	142	1	0.984126984126984	0.0158730158730159	0.443661971830986	1
GM18501	ATAD3B	NM_001317238.1	11	12	198	0.00961538461538462	0.0106382978723404	-0.00102291325695581	1	1
GM18501	ATG16L1	NM_001190266.1	12	13	53	1	0.96	0.04	0.471698113207547	1
GM18501	ATG16L1	NM_001190266.1	13	14	51	0.0740740740740741	0	0.0740740740740741	0.491764705882353	1
GM18501	ATG16L2	NM_001318766.1	4	5	69	0.0277777777777778	0	0.0277777777777778	1	1
GM18501	ATG16L2	NM_001318766.1	6	7	30	0.8	0.933333333333333	-0.133333333333333	0.597701149425287	1
GM18501	ATG4B	NM_013325.4	7	8	34	1	0.944444444444444	0.0555555555555556	1	1
GM18501	ATG4B	NM_013325.4	8	9	61	0.16	0.111111111111111	0.0488888888888889	0.705557788368652	1
GM18501	ATG4B	NM_013325.4	9	10	47	0.56	0.818181818181818	-0.258181818181818	0.0698299583661817	0.941303414491544
GM18501	ATG4B	NM_013325.4	10	11	73	0.138888888888889	0.0540540540540541	0.0848348348348348	0.261135246850414	1
GM18501	ATG4B	NM_013325.4	11	12	338	0.994708994708995	0.993288590604027	0.0014204041049678	1	1
GM18501	ATG4B	NM_178326.2	11	12	338	0.994708994708995	0.993288590604027	0.0014204041049678	1	1
GM18501	ATP10D	NM_020453.3	21	22	34	0	0.0454545454545455	-0.0454545454545455	1	1
GM18501	ATP13A1	NM_020410.2	4	3	24	0	0.0714285714285714	-0.0714285714285714	1	1
GM18501	ATP13A1	NM_020410.2	18	17	33	0.142857142857143	0.157894736842105	-0.0150375939849624	1	1
GM18501	ATP13A1	NM_020410.2	21	20	29	0	0.157894736842105	-0.157894736842105	0.532019704433498	1
GM18501	ATP13A1	NM_020410.2	23	22	68	0.0434782608695652	0.0222222222222222	0.021256038647343	1	1
GM18501	ATP13A1	NM_020410.2	25	24	47	0.0526315789473684	0	0.0526315789473684	0.404255319148936	1
GM18501	ATP1B3	NM_001679.2	5	6	25	0.416666666666667	0.384615384615385	0.032051282051282	1	1
GM18501	ATP2A2	NM_001681.3	15	16	32	1	0.904761904761905	0.0952380952380952	0.534274193548387	1
GM18501	ATP2A2	NM_001681.3	16	17	35	0.142857142857143	0.238095238095238	-0.0952380952380952	0.676030408118349	1
GM18501	ATP2C1	NM_001001485.2	11	12	27	0.933333333333333	0.916666666666667	0.0166666666666667	1	1
GM18501	ATP2C1	NM_001001485.2	18	19	33	0	0.0555555555555556	-0.0555555555555556	1	1
GM18501	ATP5PO	NM_001697.2	6	5	39	0.0625	0	0.0625	0.41025641025641	1
GM18501	ATP6V0B	NM_001039457.2	1	2	115	0	0.0178571428571429	-0.0178571428571429	0.48695652173913	1
GM18501	ATP6V0B	NM_001039457.2	2	3	102	1	0.981132075471698	0.0188679245283019	1	1
GM18501	ATP6V0B	NM_001039457.2	4	5	55	0.357142857142857	0.407407407407407	-0.0502645502645502	0.78477355289762	1
GM18501	ATP6V0B	NM_001039457.2	5	6	226	1	0.91304347826087	0.0869565217391305	0.000692597605173501	0.0439868394469767
GM18501	ATP6V0B	NM_001294333.1	1	2	60	0.59375	0.571428571428571	0.0223214285714286	1	1
GM18501	ATRAID	NM_001170795.1	2	3	24	0.0833333333333333	0	0.0833333333333333	1	1
GM18501	ATRAID	NM_016085.4	1	2	38	0.0555555555555556	0	0.0555555555555556	0.473684210526316	1
GM18501	ATXN2L	NM_001308230.1	6	7	29	0.6	0.473684210526316	0.126315789473684	0.699850074962519	1
GM18501	ATXN2L	NM_001308230.1	10	11	42	0.125	0.333333333333333	-0.208333333333333	0.139051116458048	1
GM18501	ATXN2L	NM_001308230.1	12	13	33	0.0588235294117647	0.0625	-0.0036764705882353	1	1
GM18501	ATXN2L	NM_001308230.1	15	16	39	0.0384615384615385	0	0.0384615384615385	1	1
GM18501	ATXN2L	NM_001308230.1	18	19	25	0.461538461538462	0.75	-0.288461538461538	0.226194642616772	1
GM18501	ATXN2L	NM_001308230.1	19	20	39	0.952380952380952	1	-0.0476190476190477	1	1
GM18501	ATXN2L	NM_001308230.1	20	21	73	0.622222222222222	0.571428571428571	0.0507936507936508	0.80625787198987	1
GM18501	ATXN2L	NM_001308230.1	21	22	441	0.995260663507109	1	-0.00473933649289104	0.478458049886621	1
GM18501	ATXN2L	NM_007245.3	10	11	42	0.125	0.333333333333333	-0.208333333333333	0.139051116458048	1
GM18501	ATXN2L	NM_145714.2	21	22	441	0.995260663507109	1	-0.00473933649289104	0.478458049886621	1
GM18501	AUP1	NM_181575.4	2	1	155	1	0.950819672131148	0.0491803278688525	0.0591274633020364	0.887468116145967
GM18501	AUP1	NM_181575.4	6	5	111	0.961538461538462	0.88135593220339	0.0801825293350718	0.169645053276405	1
GM18501	AUP1	NM_181575.4	7	6	154	0.283950617283951	0.26027397260274	0.0236766446812109	0.856483056692252	1
GM18501	AUP1	NM_181575.4	8	7	263	0.0072463768115942	0.008	-0.000753623188405797	1	1
GM18501	AUP1	NM_181575.4	10	9	80	0.195652173913043	0.0294117647058824	0.166240409207161	0.0381843692481575	0.72915866213516
GM18501	AUP1	NM_181575.4	11	10	122	0.03125	0.0344827586206897	-0.00323275862068965	1	1
GM18501	AURKAIP1	NM_001127229.1	2	1	44	0	0.117647058823529	-0.117647058823529	0.143763213530655	1
GM18501	AURKAIP1	NM_001127229.1	3	2	65	0.09375	0.0606060606060606	0.0331439393939394	0.672371344502492	1
GM18501	AURKAIP1	NM_017900.2	2	1	48	0.15625	0.0625	0.09375	0.648356290569573	1
GM18501	AZI2	NM_001134432.1	5	4	33	0.0588235294117647	0.0625	-0.0036764705882353	1	1
GM18501	B2M	NM_004048.2	1	2	332	0.931818181818182	0.942307692307692	-0.0104895104895105	0.822355958581299	1
GM18501	B2M	NM_004048.2	2	3	100	0.0545454545454545	0.0222222222222222	0.0323232323232323	0.625078897538397	1
GM18501	BANF1	NM_001143985.1	1	2	31	0	0.1875	-0.1875	0.225806451612903	1
GM18501	BANF1	NM_003860.3	1	2	44	0.318181818181818	0.409090909090909	-0.0909090909090909	0.754621502646818	1
GM18501	BAP1	NM_004656.3	9	8	54	0.037037037037037	0	0.037037037037037	1	1
GM18501	BAP1	NM_004656.3	11	10	55	0	0.0277777777777778	-0.0277777777777778	1	1
GM18501	BAP1	NM_004656.3	12	11	90	0.975609756097561	1	-0.024390243902439	0.455555555555556	1
GM18501	BAX	NM_001291428.1	1	2	198	0.246575342465753	0.384	-0.137424657534247	0.0606156325983808	0.894036808705523
GM18501	BAX	NM_001291428.1	2	3	177	0.3	0.381443298969072	-0.0814432989690722	0.270582922882421	1
GM18501	BAX	NM_138763.3	1	2	71	0.947368421052632	0.923076923076923	0.0242914979757084	1	1
GM18501	BET1L	NM_001098787.1	3	2	45	0.956521739130435	1	-0.0434782608695652	1	1
GM18501	BLMH	NM_000386.3	5	4	54	0.166666666666667	0.194444444444444	-0.0277777777777778	1	1
GM18501	BLNK	NM_001114094.1	13	12	49	0.0434782608695652	0	0.0434782608695652	0.469387755102041	1
GM18501	BLNK	NM_001114094.1	15	14	23	0.75	0.909090909090909	-0.159090909090909	0.590062111801242	1
GM18501	BLNK	NM_001258440.1	7	6	27	1	0.933333333333333	0.0666666666666667	1	1
GM18501	BMI1	NM_005180.8	1	2	24	0.2	0.357142857142857	-0.157142857142857	0.652936689549962	1
GM18501	BRAT1	NM_152743.3	6	5	55	0.206896551724138	0.0769230769230769	0.129973474801061	0.257370598325093	1
GM18501	BRAT1	NM_152743.3	10	9	77	0.976190476190476	1	-0.0238095238095238	1	1
GM18501	BRAT1	NM_152743.3	13	12	32	0.947368421052632	0.923076923076923	0.0242914979757084	1	1
GM18501	BRD2	NM_001113182.2	5	6	73	0.0731707317073171	0.09375	-0.0205792682926829	1	1
GM18501	BRD2	NM_001113182.2	6	7	262	0.97841726618705	0.975609756097561	0.00280751008948943	1	1
GM18501	BRD2	NM_001113182.2	7	8	257	0.0206896551724138	0.0446428571428571	-0.0239532019704434	0.301069519138879	1
GM18501	BRD2	NM_001113182.2	8	9	105	0.0851063829787234	0.137931034482759	-0.0528246515040352	0.540990175764338	1
GM18501	BRD2	NM_001113182.2	9	10	128	0.771428571428571	0.913978494623656	-0.142549923195084	0.0386841802270776	0.735950674647927
GM18501	BRD2	NM_001113182.2	10	11	161	0.522388059701492	0.202127659574468	0.320260400127024	3.82468286195183e-05	0.00343830908973564
GM18501	BRD2	NM_001113182.2	11	12	145	0.208955223880597	0.0641025641025641	0.144852659778033	0.0130266497526474	0.400220691738676
GM18501	BRD9	NM_001009877.2	8	7	32	0.894736842105263	0.923076923076923	-0.02834008097166	1	1
GM18501	BRD9	NM_001009877.2	9	8	106	0.0638297872340425	0.0338983050847458	0.0299314821492968	0.653227499237327	1
GM18501	BRD9	NM_001009877.2	10	9	36	0.4375	0.8	-0.3625	0.0379398626339672	0.726482177431863
GM18501	BRICD5	NM_182563.3	3	2	29	0.944444444444444	0.818181818181818	0.126262626262626	0.539408866995074	1
GM18501	BSG	NM_001322243.1	2	3	61	0.697674418604651	0.666666666666667	0.0310077519379846	1	1
GM18501	BSG	NM_001322243.1	3	4	55	0.0277777777777778	0	0.0277777777777778	1	1
GM18501	BTBD6	NM_033271.2	1	2	62	0.2	0.0576923076923077	0.142307692307692	0.180001798794066	1
GM18501	BTBD6	NM_033271.2	2	3	68	0.0952380952380952	0.0638297872340425	0.0314083080040527	0.640673541230499	1
GM18501	BTBD6	NM_033271.2	3	4	26	0.0666666666666667	0	0.0666666666666667	1	1
GM18501	BTF3	NM_001037637.1	3	4	50	0.0416666666666667	0.0384615384615385	0.0032051282051282	1	1
GM18501	BTF3	NM_001037637.1	4	5	39	0.705882352941177	0.954545454545455	-0.248663101604278	0.0683882262829631	0.935165014694087
GM18501	BTN3A1	NM_001145009.1	2	3	47	1	0.961538461538462	0.0384615384615384	1	1
GM18501	BTN3A1	NM_001145009.1	3	4	52	0.541666666666667	0.107142857142857	0.43452380952381	0.000953866270480842	0.0578459851583049
GM18501	BUB1B	NM_001211.5	20	21	32	0.428571428571429	0.166666666666667	0.261904761904762	0.131657397107898	1
GM18501	BUB3	NM_004725.3	6	7	269	0.991869918699187	1	-0.00813008130081305	0.45724907063197	1
GM18501	C1orf159	NM_017891.4	9	8	32	0.947368421052632	0.923076923076923	0.0242914979757084	1	1
GM18501	C1orf174	NM_207356.2	2	1	45	1	0.928571428571429	0.0714285714285714	0.311111111111111	1
GM18501	C21orf58	NM_001286462.1	7	6	65	1	0.956521739130435	0.0434782608695652	0.353846153846154	1
GM18501	C2CD2L	NM_001290474.1	7	8	23	0.25	0.363636363636364	-0.113636363636364	0.666846143491722	1
GM18501	C2CD2L	NM_001290474.1	11	12	29	0	0.181818181818182	-0.181818181818182	0.135467980295567	1
GM18501	C2CD2L	NM_001290474.1	12	13	20	0.9	0.7	0.2	0.582043343653251	1
GM18501	C2CD2L	NM_014807.4	11	12	29	0	0.181818181818182	-0.181818181818182	0.135467980295567	1
GM18501	C4orf33	NM_001099783.1	4	5	30	0.222222222222222	0.0833333333333333	0.138888888888889	0.622079070354932	1
GM18501	CACTIN	NM_001080543.1	7	6	23	0.181818181818182	0	0.181818181818182	0.217391304347826	1
GM18501	CAD	NM_001306079.1	19	20	25	0	0.181818181818182	-0.181818181818182	0.183333333333333	1
GM18501	CAD	NM_001306079.1	33	34	64	0.648648648648649	0.925925925925926	-0.277277277277277	0.0152643904738025	0.437390744317229
GM18501	CALM2	NM_001305624.1	4	3	27	0.0666666666666667	0	0.0666666666666667	1	1
GM18501	CALM3	NM_005184.2	2	3	54	0	0.05	-0.05	0.37037037037037	1
GM18501	CANT1	NM_001159773.1	2	1	93	0.744186046511628	0.86	-0.115813953488372	0.193214907536707	1
GM18501	CAPG	NM_001256139.1	3	2	29	0.4375	0.538461538461538	-0.100961538461538	0.715249186552235	1
GM18501	CAPG	NM_001256139.1	4	3	23	0.272727272727273	0.0833333333333333	0.189393939393939	0.316770186335404	1
GM18501	CAPN10	NM_023083.3	3	4	28	0.4	0.333333333333333	0.0666666666666667	1	1
GM18501	CAPN10	NM_023083.3	4	5	31	0.2	0.142857142857143	0.0571428571428572	1	1
GM18501	CAPN10	NM_023083.3	8	9	77	0.0384615384615385	0	0.0384615384615385	0.337662337662338	1
GM18501	CAPN15	NM_005632.2	8	9	64	0.96	1	-0.04	0.390625	1
GM18501	CAPN15	NM_005632.2	11	12	48	0	0.03125	-0.03125	1	1
GM18501	CAPN2	NM_001146068.1	16	17	52	0.974358974358974	1	-0.0256410256410257	1	1
GM18501	CAPRIN2	NM_001002259.2	16	15	22	0.363636363636364	0.272727272727273	0.0909090909090909	1	1
GM18501	CARD11	NM_001324281.1	20	19	26	0.125	0	0.125	0.507692307692308	1
GM18501	CARHSP1	NM_014316.3	2	1	31	0.8	0.9375	-0.1375	0.332591768631813	1
GM18501	CARM1	NM_199141.1	8	9	31	0.428571428571429	0.470588235294118	-0.0420168067226891	1	1
GM18501	CARMIL2	NM_001013838.1	33	34	43	0	0.0454545454545455	-0.0454545454545455	1	1
GM18501	CARS2	NM_024537.3	11	10	89	0.75	0.975609756097561	-0.225609756097561	0.00245097810052867	0.116096330027083
GM18501	CARS2	NM_024537.3	12	11	210	0.037037037037037	0.0490196078431372	-0.0119825708061002	0.742507013377666	1
GM18501	CARS2	NM_024537.3	13	12	23	0.181818181818182	0.333333333333333	-0.151515151515151	0.64040536122916	1
GM18501	CASP1	NM_001223.4	4	3	33	0	0.0833333333333333	-0.0833333333333333	0.363636363636364	1
GM18501	CASP7	NM_001227.4	5	6	32	0.0666666666666667	0	0.0666666666666667	0.46875	1
GM18501	CC2D1A	NM_017721.4	22	23	28	0	0.0666666666666667	-0.0666666666666667	1	1
GM18501	CCAR2	NM_021174.5	10	11	44	0.944444444444444	0.923076923076923	0.0213675213675213	1	1
GM18501	CCAR2	NM_021174.5	11	12	69	0	0.025	-0.025	1	1
GM18501	CCAR2	NM_021174.5	19	20	110	1	0.973684210526316	0.0263157894736842	0.345454545454545	1
GM18501	CCDC107	NM_001195200.1	3	4	34	0.857142857142857	0.9	-0.0428571428571429	1	1
GM18501	CCDC107	NM_001195201.1	3	4	34	0.857142857142857	0.9	-0.0428571428571429	1	1
GM18501	CCDC130	NM_001320561.1	9	10	65	0.428571428571429	0.3	0.128571428571429	0.31425991941578	1
GM18501	CCDC174	NM_016474.4	6	7	44	1	0.941176470588235	0.0588235294117647	0.386363636363636	1
GM18501	CCDC66	NM_001012506.4	12	13	36	0	0.0714285714285714	-0.0714285714285714	0.388888888888889	1
GM18501	CCDC78	NM_001031737.2	6	5	65	0.916666666666667	0.862068965517241	0.0545977011494253	0.690833397683531	1
GM18501	CCDC78	NM_001031737.2	7	6	29	0	0.142857142857143	-0.142857142857143	0.224137931034483	1
GM18501	CCDC78	NM_001031737.2	12	11	38	1	0.909090909090909	0.0909090909090909	0.289473684210526	1
GM18501	CCM2	NM_001029835.2	5	6	27	0.125	0.363636363636364	-0.238636363636364	0.187365291713118	1
GM18501	CCM2	NM_001029835.2	6	7	34	0.85	0.785714285714286	0.0642857142857143	0.672173627262615	1
GM18501	CCNB1	NM_031966.3	4	5	31	0.941176470588235	0.714285714285714	0.226890756302521	0.148354138343015	1
GM18501	CCNB1	NM_031966.3	5	6	43	0.0476190476190476	0.409090909090909	-0.361471861471861	0.00934194808273084	0.321112153003546
GM18501	CCNB1	NM_031966.3	7	8	24	0.307692307692308	0.0909090909090909	0.216783216783217	0.32712215320911	1
GM18501	CCNI2	NM_001287252.1	3	4	45	1	0.970588235294118	0.0294117647058824	1	1
GM18501	CCR6	NM_031409.3	1	2	39	0.0588235294117647	0	0.0588235294117647	0.435897435897436	1
GM18501	CCT2	NM_001198842.1	6	7	33	0.235294117647059	0.125	0.110294117647059	0.656183638386086	1
GM18501	CCT2	NM_001198842.1	7	8	29	0.157894736842105	0.1	0.0578947368421052	1	1
GM18501	CCT2	NM_001198842.1	14	15	147	0.0136986301369863	0	0.0136986301369863	0.496598639455782	1
GM18501	CCT3	NM_005998.4	2	1	47	0.363636363636364	0.04	0.323636363636364	0.00773100327303989	0.28739608922577
GM18501	CCT5	NM_001306153.1	6	7	45	0.961538461538462	0.736842105263158	0.224696356275304	0.0687152703601938	0.935165014694087
GM18501	CCT6A	NM_001762.3	1	2	26	0.0714285714285714	0.0833333333333333	-0.0119047619047619	1	1
GM18501	CCT7	NM_001009570.2	2	3	58	0.96551724137931	1	-0.0344827586206896	1	1
GM18501	CCT7	NM_001009570.2	3	4	59	0.04	0.0588235294117647	-0.0188235294117647	1	1
GM18501	CCT7	NM_001009570.2	4	5	28	0.333333333333333	0.461538461538462	-0.128205128205128	0.700038138825324	1
GM18501	CCT7	NM_001009570.2	5	6	27	0.166666666666667	0	0.166666666666667	0.188034188034188	1
GM18501	CCT7	NM_001166284.1	2	3	29	0.88235294117647	1	-0.117647058823529	0.497536945812808	1
GM18501	CCT7	NM_001166284.1	3	4	63	0.0645161290322581	0.03125	0.0332661290322581	0.6128024980484	1
GM18501	CD164	NM_001142401.1	2	1	60	0	0.027027027027027	-0.027027027027027	1	1
GM18501	CD164	NM_001142401.1	4	3	59	0.153846153846154	0	0.153846153846154	0.0328480464750421	0.680717105969399
GM18501	CD164	NM_001142403.1	5	4	60	0.148148148148148	0	0.148148148148148	0.0359900335291765	0.711744032558796
GM18501	CD22	NM_001185099.1	3	4	73	0.9	0.96969696969697	-0.0696969696969697	0.369366886249001	1
GM18501	CD22	NM_001185099.1	10	11	96	1	0.976744186046512	0.0232558139534884	0.447916666666667	1
GM18501	CD22	NM_001185099.1	11	12	90	0	0.024390243902439	-0.024390243902439	0.455555555555556	1
GM18501	CD274	NM_001267706.1	3	4	130	0.985507246376812	0.983606557377049	0.00190068899976248	1	1
GM18501	CD274	NM_001267706.1	4	5	54	0	0.08	-0.08	0.209643605870021	1
GM18501	CD274	NM_014143.3	3	4	31	0.0526315789473684	0	0.0526315789473684	1	1
GM18501	CD2BP2	NM_001243646.1	4	3	25	0.727272727272727	0.928571428571429	-0.201298701298701	0.287826086956522	1
GM18501	CD40	NM_001250.5	5	6	51	0.12	0.0384615384615385	0.0815384615384615	0.349739895958383	1
GM18501	CD40	NM_001250.5	6	7	66	0.0714285714285714	0	0.0714285714285714	0.176223776223776	1
GM18501	CD40	NM_001322421.1	6	7	66	0.0714285714285714	0	0.0714285714285714	0.176223776223776	1
GM18501	CD40	NM_001322422.1	4	5	59	0.0416666666666667	0	0.0416666666666667	0.406779661016949	1
GM18501	CD47	NM_198793.2	8	7	58	0	0.0294117647058824	-0.0294117647058824	1	1
GM18501	CD48	NM_001256030.1	2	1	73	0.846153846153846	0.808510638297872	0.0376432078559739	0.760231434788627	1
GM18501	CD48	NM_001778.3	3	2	188	0.558441558441558	0.441441441441441	0.117000117000117	0.138289883300084	1
GM18501	CD74	NM_001025158.2	2	1	27	0.846153846153846	0.785714285714286	0.0604395604395604	1	1
GM18501	CD74	NM_001025159.2	4	3	36	0.238095238095238	0.4	-0.161904761904762	0.46459028550241	1
GM18501	CD74	NM_001025159.2	5	4	52	0.125	0	0.125	0.0904977375565611	1
GM18501	CD74	NM_001025159.2	8	7	60	0.037037037037037	0	0.037037037037037	0.45	1
GM18501	CD74	NM_004355.3	6	5	86	0.923076923076923	1	-0.0769230769230769	0.0893003713113152	1
GM18501	CD74	NM_004355.3	7	6	72	0.257142857142857	0.108108108108108	0.149034749034749	0.130548249295254	1
GM18501	CD79B	NM_000626.2	2	1	51	0.733333333333333	0.666666666666667	0.0666666666666667	0.756524847701638	1
GM18501	CD79B	NM_000626.2	3	2	54	0.695652173913043	0.774193548387097	-0.0785413744740533	0.545596285845099	1
GM18501	CD79B	NM_000626.2	4	3	119	0.227272727272727	0.264150943396226	-0.0368782161234991	0.672225301032566	1
GM18501	CD79B	NM_000626.2	5	4	69	0.58974358974359	0.433333333333333	0.156410256410256	0.230541088581081	1
GM18501	CD79B	NM_001039933.1	2	1	50	0.758620689655172	0.666666666666667	0.0919540229885058	0.534353771229382	1
GM18501	CD79B	NM_021602.2	3	2	62	0	0.0869565217391304	-0.0869565217391304	0.13379164463247	1
GM18501	CD81	NM_001297649.1	2	3	79	0.0465116279069767	0.222222222222222	-0.175710594315245	0.0373753638767907	0.722506573824934
GM18501	CD81	NM_001297649.1	3	4	59	0.40625	0.37037037037037	0.0358796296296297	0.79586210891529	1
GM18501	CD81	NM_001297649.1	4	5	52	0.347826086956522	0.241379310344828	0.106446776611694	0.539598638359533	1
GM18501	CD81	NM_001297649.1	5	6	34	0.933333333333333	0.736842105263158	0.196491228070175	0.196009529304694	1
GM18501	CD81	NM_001297649.1	6	7	66	0.0882352941176471	0.09375	-0.00551470588235294	1	1
GM18501	CD82	NM_001024844.1	6	7	28	0.125	0	0.125	0.492063492063492	1
GM18501	CDC123	NM_006023.2	10	11	34	0.0625	0.0555555555555556	0.00694444444444445	1	1
GM18501	CDC16	NM_001078645.1	6	7	111	0.0181818181818182	0.0178571428571429	0.000324675324675325	1	1
GM18501	CDC16	NM_001078645.1	7	8	27	1	0.916666666666667	0.0833333333333334	0.444444444444444	1
GM18501	CDC16	NM_001078645.1	8	9	65	0	0.0384615384615385	-0.0384615384615385	0.4	1
GM18501	CDC16	NM_001078645.1	14	15	36	0	0.0588235294117647	-0.0588235294117647	0.472222222222222	1
GM18501	CDC16	NM_001078645.1	15	16	71	0	0.0454545454545455	-0.0454545454545455	0.309859154929577	1
GM18501	CDCA7	NM_031942.4	6	7	49	0.15625	0.176470588235294	-0.0202205882352941	1	1
GM18501	CDCA7	NM_031942.4	7	8	30	0.733333333333333	0.866666666666667	-0.133333333333333	0.651340996168582	1
GM18501	CDCA7	NM_031942.4	8	9	27	0.0769230769230769	0.142857142857143	-0.0659340659340659	1	1
GM18501	CDK1	NM_001320918.1	3	4	114	0.986301369863014	1	-0.0136986301369864	1	1
GM18501	CDK1	NM_001320918.1	5	6	38	0.05	0.0555555555555556	-0.00555555555555555	1	1
GM18501	CDK11A	NM_001313896.1	9	8	38	0.05	0	0.05	1	1
GM18501	CDK11A	NM_001313896.1	12	11	32	0	0.0952380952380952	-0.0952380952380952	0.534274193548387	1
GM18501	CDK11A	NM_001313896.1	13	12	143	0.842105263157895	1	-0.157894736842105	0.00203063343608744	0.101655102464212
GM18501	CDK11A	NM_001313896.1	14	13	206	0.96875	0.512820512820513	0.455929487179487	2.41324478451757e-15	8.00163020695039e-13
GM18501	CDK11A	NM_001313896.1	15	14	259	0.0170940170940171	0.028169014084507	-0.0110749969904899	0.692715450630096	1
GM18501	CDK11A	NM_001313896.1	16	15	52	0.615384615384615	0.153846153846154	0.461538461538462	0.00139782690939792	0.0775824322257356
GM18501	CDK11A	NM_001313896.1	17	16	103	0.659574468085106	0.982142857142857	-0.322568389057751	7.5637684273111e-06	0.000835976500942336
GM18501	CDK11A	NM_001313896.1	18	17	141	0.324324324324324	0.223880597014925	0.100443727309399	0.193633154944767	1
GM18501	CDK11A	NM_001313896.1	19	18	84	0.409090909090909	0.425	-0.0159090909090909	1	1
GM18501	CDK17	NM_002595.4	16	15	28	0.769230769230769	0.6	0.169230769230769	0.434782608695652	1
GM18501	CDT1	NM_030928.3	3	4	61	0.0196078431372549	0.3	-0.280392156862745	0.0121298061722126	0.380449731428452
GM18501	CDT1	NM_030928.3	6	7	32	0.75	0.375	0.375	0.0731727514850385	0.960487902469327
GM18501	CDT1	NM_030928.3	7	8	34	0.681818181818182	0.5	0.181818181818182	0.46175702471345	1
GM18501	CDT1	NM_030928.3	8	9	39	0.260869565217391	0.4375	-0.176630434782609	0.311511734203614	1
GM18501	CENPJ	NM_018451.4	13	12	45	0	0.2	-0.2	0.157475205830282	1
GM18501	CENPJ	NM_018451.4	15	14	42	0	0.037037037037037	-0.037037037037037	1	1
GM18501	CENPT	NM_025082.3	11	10	195	0.99047619047619	1	-0.00952380952380949	1	1
GM18501	CENPT	NM_025082.3	13	12	33	0.941176470588235	0.9375	0.00367647058823528	1	1
GM18501	CENPT	NM_025082.3	15	14	27	1	0.9375	0.0625	1	1
GM18501	CEP164	NM_001271933.1	28	29	35	0	0.0526315789473684	-0.0526315789473684	1	1
GM18501	CEP164	NM_001271933.1	29	30	56	1	0.970588235294118	0.0294117647058824	1	1
GM18501	CEP164	NM_014956.4	29	30	35	0	0.0526315789473684	-0.0526315789473684	1	1
GM18501	CEP95	NM_001316990.1	12	13	38	0.0416666666666667	0.142857142857143	-0.101190476190476	0.541963015647226	1
GM18501	CERS2	NM_022075.4	6	5	44	0.96	1	-0.04	1	1
GM18501	CERS2	NM_022075.4	7	6	34	0	0.0666666666666667	-0.0666666666666667	0.441176470588235	1
GM18501	CERS2	NM_022075.4	8	7	28	0.857142857142857	0.785714285714286	0.0714285714285714	1	1
GM18501	CERS2	NM_022075.4	9	8	45	0.0434782608695652	0.0909090909090909	-0.0474308300395257	0.607751937984496	1
GM18501	CERS4	NM_024552.2	10	11	46	0.0666666666666667	0	0.0666666666666667	0.326086956521739	1
GM18501	CFL1	NM_005507.2	2	1	142	0.648148148148148	0.318181818181818	0.32996632996633	0.000224591880616701	0.0165457555401576
GM18501	CFL1	NM_005507.2	3	2	61	0.321428571428571	0.212121212121212	0.109307359307359	0.390096910561885	1
GM18501	CGGBP1	NM_001195308.1	3	2	31	0	0.0625	-0.0625	1	1
GM18501	CGGBP1	NM_003663.3	2	1	36	0.166666666666667	0.166666666666667	0	1	1
GM18501	CHAF1A	NM_005483.2	13	14	57	0.96875	0.88	0.08875	0.309384572542467	1
GM18501	CHCHD10	NM_001301339.1	2	1	35	0.0454545454545455	0.769230769230769	-0.723776223776224	1.52675085607102e-05	0.00153462504355705
GM18501	CHCHD10	NM_001301339.1	3	2	44	0.037037037037037	0	0.037037037037037	1	1
GM18501	CHCHD10	NM_213720.2	2	1	35	0.0454545454545455	0.769230769230769	-0.723776223776224	1.52675085607102e-05	0.00153462504355705
GM18501	CHCHD10	NM_213720.2	3	2	44	0.037037037037037	0	0.037037037037037	1	1
GM18501	CHD1L	NM_001256336.1	5	6	33	0.1	0.0769230769230769	0.0230769230769231	1	1
GM18501	CHD1L	NM_001256336.1	8	9	52	0.04	0.037037037037037	0.00296296296296297	1	1
GM18501	CHD1L	NM_001256336.1	16	17	26	0.125	0.1	0.025	1	1
GM18501	CHD8	NM_001170629.1	34	33	24	0.615384615384615	0.363636363636364	0.251748251748252	0.41364921254543	1
GM18501	CHERP	NM_006387.5	14	13	36	1	0.952380952380952	0.0476190476190477	1	1
GM18501	CHERP	NM_006387.5	15	14	56	0.777777777777778	0.689655172413793	0.0881226053639846	0.552298622902523	1
GM18501	CHERP	NM_006387.5	16	15	46	0.0833333333333333	0.136363636363636	-0.053030303030303	0.65891472868217	1
GM18501	CHFR	NM_001161344.1	11	10	43	0.0588235294117647	0	0.0588235294117647	0.395348837209302	1
GM18501	CHFR	NM_001161345.1	11	10	43	0.0588235294117647	0	0.0588235294117647	0.395348837209302	1
GM18501	CHKB	NM_005198.4	2	1	68	0.193548387096774	0.297297297297297	-0.103748910200523	0.40476162040578	1
GM18501	CHKB	NM_005198.4	3	2	145	0.628571428571429	0.0727272727272727	0.555844155844156	6.09624660339257e-11	1.49656992337707e-08
GM18501	CHKB	NM_005198.4	4	3	83	0.444444444444444	0	0.444444444444444	1.10939198858449e-06	0.000143049933639144
GM18501	CHKB	NM_005198.4	7	6	231	0.00645161290322581	0.0131578947368421	-0.0067062818336163	0.550724637681159	1
GM18501	CHTF18	NM_022092.2	7	8	55	0.6	0.52	0.08	0.594481387798361	1
GM18501	CHTOP	NM_001206612.1	3	4	45	0.208333333333333	0.0952380952380952	0.113095238095238	0.421629797693326	1
GM18501	CHTOP	NM_015607.3	3	4	45	0.208333333333333	0.0952380952380952	0.113095238095238	0.421629797693326	1
GM18501	CIAO2A	NM_001014812.2	3	2	23	0.923076923076923	1	-0.0769230769230769	1	1
GM18501	CIAO3	NM_001304799.1	7	6	34	0.954545454545455	1	-0.0454545454545454	1	1
GM18501	CIAO3	NM_001304799.1	8	7	29	0	0.0769230769230769	-0.0769230769230769	0.448275862068966	1
GM18501	CIAO3	NM_001304799.1	9	8	26	0.272727272727273	0.0666666666666667	0.206060606060606	0.278929765886288	1
GM18501	CIAO3	NM_001304799.1	10	9	28	0	0.0588235294117647	-0.0588235294117647	1	1
GM18501	CIB1	NM_001277764.1	4	3	116	0.0483870967741935	0	0.0483870967741935	0.247076461769115	1
GM18501	CIB1	NM_001277764.1	5	4	46	0.884615384615385	0.9	-0.0153846153846154	1	1
GM18501	CIB1	NM_001277764.1	6	5	43	0.0384615384615385	0	0.0384615384615385	1	1
GM18501	CIB1	NM_006384.3	3	2	119	0.0102040816326531	0.523809523809524	-0.513605442176871	3.67390289161411e-09	7.16018433021373e-07
GM18501	CIITA	NM_000246.3	16	17	21	0.818181818181818	1	-0.181818181818182	0.476190476190476	1
GM18501	CIITA	NM_000246.3	17	18	38	0.565217391304348	0.733333333333333	-0.168115942028985	0.32927326659251	1
GM18501	CIITA	NM_000246.3	18	19	50	0.655172413793103	0.571428571428571	0.083743842364532	0.569996506961726	1
GM18501	CLASRP	NM_001278439.1	15	16	26	0.714285714285714	0.583333333333333	0.130952380952381	0.682837528604119	1
GM18501	CLASRP	NM_001278439.1	16	17	28	0.5	0.333333333333333	0.166666666666667	0.458944035280016	1
GM18501	CLCN7	NM_001114331.2	15	14	24	0.3	0.428571428571429	-0.128571428571429	0.678456050612465	1
GM18501	CLCN7	NM_001114331.2	16	15	26	0.818181818181818	0.8	0.0181818181818182	1	1
GM18501	CLCN7	NM_001114331.2	17	16	63	0.0277777777777778	0	0.0277777777777778	1	1
GM18501	CLPTM1	NM_001282175.1	7	8	46	0.117647058823529	0	0.117647058823529	0.131400966183575	1
GM18501	CLPTM1L	NM_030782.4	12	11	22	0.166666666666667	0	0.166666666666667	0.48051948051948	1
GM18501	CLUH	NM_015229.3	25	24	32	1	0.923076923076923	0.0769230769230769	0.40625	1
GM18501	CMPK1	NM_001136140.1	3	4	32	0.0666666666666667	0.0588235294117647	0.00784313725490196	1	1
GM18501	CMTR1	NM_015050.2	20	21	31	0.0625	0	0.0625	1	1
GM18501	CNDP2	NM_001168499.1	5	6	42	0.961538461538462	1	-0.0384615384615384	1	1
GM18501	CNDP2	NM_001168499.1	6	7	40	0.0526315789473684	0	0.0526315789473684	0.475	1
GM18501	CNDP2	NM_001168499.1	7	8	83	0	0.0303030303030303	-0.0303030303030303	0.397590361445783	1
GM18501	CNOT1	NM_001265612.1	32	31	23	0	0.333333333333333	-0.333333333333333	0.093167701863354	1
GM18501	CNOT1	NM_001265612.1	34	33	23	0.692307692307692	0.8	-0.107692307692308	0.660019614253024	1
GM18501	CNOT1	NM_001265612.1	35	34	34	0.0555555555555556	0	0.0555555555555556	1	1
GM18501	CNOT11	NM_017546.4	5	6	24	0.923076923076923	0.909090909090909	0.0139860139860141	1	1
GM18501	CNOT2	NM_001199302.1	14	15	35	0	0.0625	-0.0625	0.457142857142857	1
GM18501	CNPPD1	NM_001321389.1	5	4	64	0.821428571428571	0.972222222222222	-0.150793650793651	0.078194883883516	0.992539479474654
GM18501	CNPPD1	NM_001321389.1	6	5	68	0.172413793103448	0.0512820512820513	0.121131741821397	0.127356468477004	1
GM18501	CNPPD1	NM_001321389.1	8	7	38	0.421052631578947	0.526315789473684	-0.105263157894737	0.745854585473486	1
GM18501	CNPPD1	NM_001321390.1	2	1	233	0.00900900900900901	0	0.00900900900900901	0.476394849785408	1
GM18501	CNTRL	NM_007018.4	38	39	27	0	0.0833333333333333	-0.0833333333333333	0.444444444444444	1
GM18501	CNTROB	NM_001037144.5	13	14	24	0	0.1	-0.1	0.416666666666667	1
GM18501	COG2	NM_001145036.1	12	13	35	0.941176470588235	1	-0.0588235294117647	0.485714285714286	1
GM18501	COG2	NM_001145036.1	14	15	27	0	0.0625	-0.0625	1	1
GM18501	COG2	NM_007357.2	14	15	27	0	0.0625	-0.0625	1	1
GM18501	COG4	NM_001195139.1	14	13	37	0.0526315789473684	0	0.0526315789473684	1	1
GM18501	COLGALT1	NM_024656.3	9	10	38	1	0.958333333333333	0.0416666666666666	1	1
GM18501	COMMD3-BMI1	NM_001204062.1	1	2	23	0.7	0.692307692307692	0.00769230769230766	1	1
GM18501	COMMD3-BMI1	NM_001204062.1	2	3	36	1	0.91304347826087	0.0869565217391305	0.525396825396825	1
GM18501	COMMD4	NM_001284377.1	3	4	59	0.5	0.482758620689655	0.0172413793103448	1	1
GM18501	COMMD4	NM_001284377.1	4	5	74	0.828571428571429	0.769230769230769	0.0593406593406594	0.574716928614125	1
GM18501	COMMD4	NM_001321844.1	5	6	46	0.833333333333333	0.607142857142857	0.226190476190476	0.18827422221756	1
GM18501	COPG1	NM_016128.3	10	11	50	0.75	0.846153846153846	-0.0961538461538462	0.489661688162792	1
GM18501	COPS6	NM_006833.4	4	5	51	0.5	0.666666666666667	-0.166666666666667	0.265131468363582	1
GM18501	COPS6	NM_006833.4	5	6	25	0.8	0.6	0.2	0.401789057624298	1
GM18501	COPS6	NM_006833.4	6	7	57	0.342857142857143	0.545454545454545	-0.202597402597403	0.171886798636119	1
GM18501	COPS7A	NM_001164093.1	2	3	27	0.941176470588235	1	-0.0588235294117647	1	1
GM18501	COPS7A	NM_001164093.1	5	6	71	0.975	0.967741935483871	0.00725806451612898	1	1
GM18501	CORO1A	NM_001193333.2	6	7	61	0.902439024390244	0.95	-0.047560975609756	1	1
GM18501	CORO1A	NM_001193333.2	7	8	40	0.586206896551724	0.636363636363636	-0.0501567398119123	1	1
GM18501	CORO7	NM_001201472.1	27	26	27	0.9375	0.818181818181818	0.119318181818182	0.548717948717949	1
GM18501	CPNE1	NM_001198863.1	10	9	62	0.964285714285714	0.911764705882353	0.0525210084033614	0.61986214808773	1
GM18501	CPNE1	NM_001198863.1	11	10	43	0.9	0.826086956521739	0.0739130434782609	0.668833718748637	1
GM18501	CPNE1	NM_001198863.1	13	12	71	0.0303030303030303	0.131578947368421	-0.101275917065391	0.205636844312814	1
GM18501	CPNE1	NM_001198863.1	14	13	91	0.7	0.819672131147541	-0.119672131147541	0.280954158564609	1
GM18501	CPNE1	NM_001198863.1	15	14	88	0.416666666666667	0.09375	0.322916666666667	0.00115975986770326	0.0672950663234817
GM18501	CPNE1	NM_003915.5	14	13	91	0.7	0.819672131147541	-0.119672131147541	0.280954158564609	1
GM18501	CPNE1	NM_003915.5	15	14	88	0.416666666666667	0.09375	0.322916666666667	0.00115975986770326	0.0672950663234817
GM18501	CPSF1	NM_013291.2	35	34	44	0	0.04	-0.04	1	1
GM18501	CPT1B	NM_001145134.1	2	1	52	0.0588235294117647	0	0.0588235294117647	0.326923076923077	1
GM18501	CPT1B	NM_001145134.1	3	2	39	0.8	1	-0.2	0.0607287449392713	0.894403644912728
GM18501	CPT1B	NM_001145134.1	7	6	36	0.5	0.375	0.125	0.499110122358176	1
GM18501	CPT1B	NM_001145134.1	8	7	60	0.909090909090909	0.979591836734694	-0.0705009276437848	0.335593220338983	1
GM18501	CPT1B	NM_001145134.1	9	8	60	0.736842105263158	0.170731707317073	0.566110397946085	3.50169560516162e-05	0.00317027625870147
GM18501	CPT1B	NM_001145134.1	12	11	35	1	0.9375	0.0625	0.457142857142857	1
GM18501	CPT1B	NM_001145134.1	13	12	48	0.4	0.424242424242424	-0.0242424242424242	1	1
GM18501	CPT1B	NM_001145134.1	14	13	40	0.0714285714285714	0.269230769230769	-0.197802197802198	0.221636497178293	1
GM18501	CPT1B	NM_001145135.1	4	3	157	1	0.96078431372549	0.0392156862745098	0.298308636093719	1
GM18501	CPT1B	NM_001145135.1	5	4	203	0	0.0143884892086331	-0.0143884892086331	1	1
GM18501	CRBN	NM_001173482.1	7	6	30	0.8125	1	-0.1875	0.227586206896552	1
GM18501	CRBN	NM_001173482.1	9	8	37	0.05	0	0.05	1	1
GM18501	CRELD2	NM_001135101.2	8	9	85	0	0.02	-0.02	1	1
GM18501	CRTC2	NM_181715.2	2	1	34	0.238095238095238	0.153846153846154	0.0842490842490842	0.68181557940195	1
GM18501	CRTC2	NM_181715.2	3	2	35	0.285714285714286	0.238095238095238	0.0476190476190476	1	1
GM18501	CRTC2	NM_181715.2	6	5	36	0.444444444444444	0.666666666666667	-0.222222222222222	0.314529831858264	1
GM18501	CRTC2	NM_181715.2	7	6	64	0.884615384615385	0.894736842105263	-0.0101214574898786	1	1
GM18501	CRTC2	NM_181715.2	10	9	44	0.944444444444444	1	-0.0555555555555556	0.409090909090909	1
GM18501	CRTC2	NM_181715.2	11	10	69	0.04	0.0227272727272727	0.0172727272727273	1	1
GM18501	CRTC2	NM_181715.2	12	11	36	0.176470588235294	0.157894736842105	0.0185758513931889	1	1
GM18501	CRTC2	NM_181715.2	13	12	39	0.105263157894737	0.5	-0.394736842105263	0.0138141478519677	0.410580918287062
GM18501	CSDE1	NM_001007553.2	17	16	37	0.941176470588235	1	-0.0588235294117647	0.45945945945946	1
GM18501	CSDE1	NM_001007553.2	18	17	28	0.214285714285714	0.214285714285714	0	1	1
GM18501	CSE1L	NM_001256135.1	21	22	24	0.214285714285714	0.5	-0.285714285714286	0.203795934849913	1
GM18501	CSE1L	NM_001256135.1	22	23	21	0.909090909090909	0.7	0.209090909090909	0.31077694235589	1
GM18501	CTDSP1	NM_001206878.1	4	5	34	0	0.0869565217391304	-0.0869565217391304	1	1
GM18501	CTDSP1	NM_001206878.1	5	6	31	0.823529411764706	0.642857142857143	0.180672268907563	0.412476414122688	1
GM18501	CTDSP1	NM_021198.2	1	2	28	0.2	0.153846153846154	0.0461538461538462	1	1
GM18501	CTDSP1	NM_182642.2	1	2	28	0.2	0.153846153846154	0.0461538461538462	1	1
GM18501	CTNNA1	NM_001290309.2	15	16	36	0.111111111111111	0.111111111111111	0	1	1
GM18501	CTNNB1	NM_001098209.1	13	14	28	0.941176470588235	0.818181818181818	0.122994652406417	0.543345543345543	1
GM18501	CTRL	NM_001907.2	3	2	34	0.0555555555555556	0.25	-0.194444444444444	0.164222873900293	1
GM18501	CTSH	NM_001319137.1	10	9	72	0.977777777777778	1	-0.0222222222222223	1	1
GM18501	CTSH	NM_001319137.1	11	10	73	0.0227272727272727	0	0.0227272727272727	1	1
GM18501	CTSH	NM_001319137.1	12	11	20	0.9	1	-0.1	1	1
GM18501	CTSH	NM_004390.4	6	5	73	0.142857142857143	0.0263157894736842	0.116541353383459	0.0982189543854351	1
GM18501	CTSZ	NM_001336.3	4	3	35	0.35	0.533333333333333	-0.183333333333333	0.320776593270185	1
GM18501	CTU2	NM_001012759.2	11	12	35	0.157894736842105	0.125	0.0328947368421053	1	1
GM18501	CTU2	NM_001012759.2	12	13	34	1	0.866666666666667	0.133333333333333	0.18716577540107	1
GM18501	CWC15	NM_016403.3	5	4	68	0.0333333333333333	0	0.0333333333333333	0.441176470588235	1
GM18501	CXXC1	NM_001101654.1	11	10	23	0.9	1	-0.1	0.434782608695652	1
GM18501	CYBA	NM_000101.3	3	2	32	0.909090909090909	0.7	0.209090909090909	0.292616796440489	1
GM18501	DAZAP1	NM_018959.3	6	7	131	0	0.0116279069767442	-0.0116279069767442	1	1
GM18501	DAZAP2	NM_001136264.1	1	2	42	1	0.958333333333333	0.0416666666666666	1	1
GM18501	DCTN1	NM_001135040.2	19	18	21	0.545454545454545	0.6	-0.0545454545454546	1	1
GM18501	DCTN1	NM_001135040.2	20	19	24	0	0.1	-0.1	0.416666666666667	1
GM18501	DCTN1	NM_001135040.2	23	22	26	0.142857142857143	0.25	-0.107142857142857	0.634782608695652	1
GM18501	DDB2	NM_000107.2	6	7	20	0	0.9	-0.9	0.000119075970469159	0.00956015283662927
GM18501	DDIT3	NM_001195056.1	2	1	37	0.944444444444444	0.789473684210526	0.154970760233918	0.33976833976834	1
GM18501	DDIT3	NM_001195057.1	2	1	64	0.974358974358974	1	-0.0256410256410257	1	1
GM18501	DDIT3	NM_001195057.1	3	2	36	0.0454545454545455	0	0.0454545454545455	1	1
GM18501	DDIT3	NM_004083.5	2	1	64	0.974358974358974	1	-0.0256410256410257	1	1
GM18501	DDIT3	NM_004083.5	3	2	36	0.0454545454545455	0	0.0454545454545455	1	1
GM18501	DDIT4	NM_019058.2	1	2	75	0.476190476190476	0.515151515151515	-0.038961038961039	0.817764245592814	1
GM18501	DDOST	NM_005216.4	9	8	41	0.375	0.470588235294118	-0.0955882352941176	0.748374592341059	1
GM18501	DDOST	NM_005216.4	10	9	46	0.16	0.0476190476190476	0.112380952380952	0.356558507215737	1
GM18501	DDX20	NM_007204.4	6	7	32	0.31578947368421	0.230769230769231	0.0850202429149797	0.703587319243604	1
GM18501	DDX20	NM_007204.4	8	9	26	0.1	0.25	-0.15	0.616904834296139	1
GM18501	DDX27	NM_017895.7	11	12	28	0.941176470588235	0.636363636363636	0.304812834224599	0.0617826617826618	0.901356078841793
GM18501	DDX39A	NM_005804.3	2	1	67	0.714285714285714	0.6875	0.0267857142857143	1	1
GM18501	DDX39A	NM_005804.3	5	4	57	0.956521739130435	1	-0.0434782608695652	0.403508771929825	1
GM18501	DDX39A	NM_005804.3	8	7	108	0.961538461538462	0.964285714285714	-0.00274725274725274	1	1
GM18501	DDX39B	NM_004640.6	9	8	131	0.863636363636364	0.846153846153846	0.0174825174825175	0.808781583591329	1
GM18501	DDX39B	NM_004640.6	10	9	109	0.196428571428571	0.0754716981132075	0.120956873315364	0.0949739048294407	1
GM18501	DDX5	NM_001320595.1	4	3	26	0	0.0769230769230769	-0.0769230769230769	1	1
GM18501	DDX51	NM_175066.3	7	6	44	0.458333333333333	0.3	0.158333333333333	0.358534105211733	1
GM18501	DDX51	NM_175066.3	8	7	53	0.772727272727273	1	-0.227272727272727	0.00917661694576234	0.318759465635726
GM18501	DDX56	NM_001257189.1	12	11	24	0.181818181818182	0.615384615384615	-0.433566433566434	0.0471799703863239	0.798774419053869
GM18501	DDX56	NM_019082.3	6	5	46	1	0.931034482758621	0.0689655172413793	0.523671497584541	1
GM18501	DDX56	NM_019082.3	7	6	50	0	0.03125	-0.03125	1	1
GM18501	DEF8	NM_001242816.1	9	10	26	0.538461538461538	1	-0.461538461538462	0.0149068322981366	0.429833511915559
GM18501	DELE1	NM_001142603.2	7	8	33	0.888888888888889	0.866666666666667	0.0222222222222221	1	1
GM18501	DENND1C	NM_001290331.1	8	7	58	0.628571428571429	0.782608695652174	-0.154037267080745	0.25721487721245	1
GM18501	DENND1C	NM_001290331.1	9	8	86	0.377777777777778	0.341463414634146	0.0363143631436314	0.823247785055581	1
GM18501	DENND1C	NM_001290331.1	10	9	55	0.129032258064516	0.166666666666667	-0.0376344086021505	0.717551438572526	1
GM18501	DENND1C	NM_001290331.1	14	13	47	0.884615384615385	1	-0.115384615384615	0.242368177613321	1
GM18501	DENND1C	NM_001290331.1	15	14	46	0.153846153846154	0.05	0.103846153846154	0.369325203501139	1
GM18501	DENND1C	NM_001290331.1	16	15	25	0.133333333333333	0.1	0.0333333333333333	1	1
GM18501	DENND2D	NM_001271833.1	8	7	43	0.888888888888889	0.875	0.0138888888888888	1	1
GM18501	DENND4B	NM_014856.2	5	4	34	0.0666666666666667	0	0.0666666666666667	0.441176470588235	1
GM18501	DENND4B	NM_014856.2	11	10	35	0.95	1	-0.05	1	1
GM18501	DENND4B	NM_014856.2	21	20	31	0.941176470588235	0.857142857142857	0.0840336134453782	0.576418242491657	1
GM18501	DENND4B	NM_014856.2	22	21	62	0.631578947368421	0.75	-0.118421052631579	0.409247071407696	1
GM18501	DENND4B	NM_014856.2	23	22	54	0.48	0.620689655172414	-0.140689655172414	0.411195673946763	1
GM18501	DENND4B	NM_014856.2	24	23	46	0.111111111111111	0.214285714285714	-0.103174603174603	0.452541145505214	1
GM18501	DENND4B	NM_014856.2	25	24	52	0.896551724137931	0.869565217391304	0.0269865067466267	1	1
GM18501	DENND5A	NM_001243254.1	18	17	33	0.0625	0.117647058823529	-0.0551470588235294	1	1
GM18501	DENND5A	NM_015213.3	22	21	24	0.5	0.857142857142857	-0.357142857142857	0.0850149088135358	1
GM18501	DEPDC1B	NM_018369.2	10	9	33	0.0526315789473684	0.0714285714285714	-0.018796992481203	1	1
GM18501	DGCR8	NM_001190326.1	10	11	29	0.266666666666667	0.285714285714286	-0.019047619047619	1	1
GM18501	DGKD	NM_003648.2	11	12	31	0	0.0526315789473684	-0.0526315789473684	1	1
GM18501	DGKD	NM_003648.2	26	27	38	0.75	0.333333333333333	0.416666666666667	0.0209955020904385	0.523984519912987
GM18501	DGKD	NM_003648.2	27	28	50	0	0.272727272727273	-0.272727272727273	0.00841836734693878	0.30197801792089
GM18501	DGKZ	NM_001105540.1	26	27	38	0.307692307692308	0.08	0.227692307692308	0.154125377035594	1
GM18501	DHPS	NM_001206974.1	3	2	34	0	0.0476190476190476	-0.0476190476190476	1	1
GM18501	DHPS	NM_001206974.1	6	5	86	0.944444444444444	0.94	0.00444444444444447	1	1
GM18501	DHPS	NM_001930.3	2	1	32	1	0.952380952380952	0.0476190476190477	1	1
GM18501	DHX15	NM_001358.2	12	11	30	0	0.230769230769231	-0.230769230769231	0.0704433497536946	0.943637584790372
GM18501	DHX15	NM_001358.2	13	12	29	0.0666666666666667	0	0.0666666666666667	1	1
GM18501	DHX34	NM_014681.5	10	11	23	0.818181818181818	0.5	0.318181818181818	0.193027325346615	1
GM18501	DHX34	NM_014681.5	15	16	30	0.2	0.2	0	1	1
GM18501	DHX37	NM_032656.3	20	19	25	0.416666666666667	0.692307692307692	-0.275641025641026	0.237743976309059	1
GM18501	DHX37	NM_032656.3	23	22	23	0.272727272727273	0	0.272727272727273	0.093167701863354	1
GM18501	DIP2A	NM_001146116.1	33	34	23	0.769230769230769	1	-0.230769230769231	0.229249011857707	1
GM18501	DLST	NM_001244883.1	4	5	32	0.833333333333333	0.785714285714286	0.0476190476190477	1	1
GM18501	DLST	NM_001244883.1	5	6	38	0.0434782608695652	0	0.0434782608695652	1	1
GM18501	DMAP1	NM_001034023.1	8	9	25	0.266666666666667	0	0.266666666666667	0.124505928853755	1
GM18501	DMTF1	NM_001142326.1	14	15	30	0.45	0.2	0.25	0.246473466563422	1
GM18501	DNAJB11	NM_016306.5	3	4	81	0.975609756097561	1	-0.024390243902439	1	1
GM18501	DNAJB11	NM_016306.5	4	5	253	0	0.0091743119266055	-0.0091743119266055	0.430830039525692	1
GM18501	DNAJB11	NM_016306.5	5	6	51	0.0416666666666667	0.037037037037037	0.00462962962962963	1	1
GM18501	DNAJC11	NM_018198.3	12	11	39	0.869565217391304	1	-0.130434782608696	0.255060728744939	1
GM18501	DNAJC11	NM_018198.3	13	12	53	0.235294117647059	0.0526315789473684	0.18266253869969	0.133293855011342	1
GM18501	DNAJC7	NM_001144766.2	13	12	34	1	0.95	0.05	1	1
GM18501	DNAJC9	NM_015190.4	2	1	65	0.1	0.0444444444444444	0.0555555555555556	0.580822403403048	1
GM18501	DNHD1	NM_144666.2	35	36	41	0.0434782608695652	0	0.0434782608695652	1	1
GM18501	DNHD1	NM_144666.2	41	42	33	0.25	0.153846153846154	0.0961538461538462	0.675642689407984	1
GM18501	DNM1L	NM_001278464.1	17	18	31	0.0666666666666667	0.0625	0.00416666666666667	1	1
GM18501	DNPEP	NM_001319116.1	6	5	50	1	0.789473684210526	0.210526315789474	0.0168302214502822	0.462306834409505
GM18501	DNPEP	NM_001319116.1	7	6	39	0.235294117647059	0	0.235294117647059	0.0289358184095026	0.633069802136959
GM18501	DNPEP	NM_001319116.1	8	7	81	0.972972972972973	1	-0.027027027027027	0.45679012345679	1
GM18501	DNPEP	NM_001319116.1	11	10	27	0.375	0.363636363636364	0.0113636363636364	1	1
GM18501	DNPEP	NM_001319116.1	12	11	48	0.032258064516129	0.0588235294117647	-0.0265654648956357	1	1
GM18501	DNTTIP2	NM_014597.4	4	3	32	0.0666666666666667	0	0.0666666666666667	0.46875	1
GM18501	DOCK10	NM_001290263.1	33	32	31	0.933333333333333	1	-0.0666666666666667	0.483870967741936	1
GM18501	DOCK10	NM_001290263.1	34	33	43	0.105263157894737	0.0833333333333333	0.0219298245614035	1	1
GM18501	DOCK2	NM_004946.2	41	42	60	0.918918918918919	0.956521739130435	-0.0376028202115158	1	1
GM18501	DOCK2	NM_004946.2	42	43	75	0.976744186046512	0.96875	0.00799418604651159	1	1
GM18501	DOCK2	NM_004946.2	49	50	30	0.842105263157895	0.636363636363636	0.205741626794258	0.371706454465075	1
GM18501	DOK1	NM_001197260.1	2	3	31	0.916666666666667	1	-0.0833333333333334	0.387096774193548	1
GM18501	DPH1	NM_001383.3	6	7	52	0	0.0454545454545455	-0.0454545454545455	0.423076923076923	1
GM18501	DPH2	NM_001319165.1	3	4	111	0	0.0212765957446809	-0.0212765957446809	0.423423423423424	1
GM18501	DPH2	NM_001319165.1	4	5	51	0.933333333333333	0.761904761904762	0.171428571428571	0.109106491810415	1
GM18501	DPP7	NM_013379.2	2	1	146	0.145833333333333	0.12	0.0258333333333333	0.801976150250418	1
GM18501	DPP7	NM_013379.2	4	3	94	0.96078431372549	0.976744186046512	-0.0159598723210214	1	1
GM18501	DPP7	NM_013379.2	5	4	37	0.64	0.583333333333333	0.0566666666666666	1	1
GM18501	DPP7	NM_013379.2	7	6	80	0.818181818181818	1	-0.181818181818182	0.00462512171372931	0.194217076436222
GM18501	DPP7	NM_013379.2	9	8	296	0.0048780487804878	0.010989010989011	-0.00611096220852318	0.521071919377004	1
GM18501	DPP7	NM_013379.2	10	9	42	0.5	0.611111111111111	-0.111111111111111	0.542090775997285	1
GM18501	DPP7	NM_013379.2	11	10	88	0.0930232558139535	0.133333333333333	-0.0403100775193798	0.739444103989326	1
GM18501	DPP7	NM_013379.2	12	11	46	0.05	0.115384615384615	-0.0653846153846154	0.621595122100683	1
GM18501	DRAM2	NM_178454.4	4	3	28	1	0.909090909090909	0.0909090909090909	0.392857142857143	1
GM18501	DRAM2	NM_178454.4	6	5	232	0.0196078431372549	0	0.0196078431372549	0.192230183609494	1
GM18501	DRAM2	NM_178454.4	7	6	117	0.32258064516129	0.290909090909091	0.0316715542521994	0.841250975225471	1
GM18501	DRAM2	NM_178454.4	8	7	92	0.0444444444444444	0.0212765957446809	0.0231678486997636	0.612637362637363	1
GM18501	DROSHA	NM_001100412.1	30	29	24	0.9	0.857142857142857	0.0428571428571429	1	1
GM18501	DST	NM_001144769.2	94	93	38	0.0588235294117647	0.142857142857143	-0.0840336134453781	0.613086770981508	1
GM18501	DUS3L	NM_001161619.1	11	10	53	0.944444444444444	1	-0.0555555555555556	0.339622641509434	1
GM18501	DUSP2	NM_004418.3	2	1	182	0.641025641025641	0.730769230769231	-0.0897435897435896	0.199562878142987	1
GM18501	DUSP2	NM_004418.3	3	2	228	0.0574712643678161	0.0780141843971631	-0.020542920029347	0.60658103239066	1
GM18501	DVL1	NM_004421.2	10	9	23	0.416666666666667	0.636363636363636	-0.21969696969697	0.41364921254543	1
GM18501	DVL1	NM_004421.2	11	10	30	0	0.0625	-0.0625	1	1
GM18501	DVL2	NM_004422.2	7	6	30	0.157894736842105	0.272727272727273	-0.114832535885167	0.640975116837186	1
GM18501	DVL2	NM_004422.2	14	13	50	0.0434782608695652	0.0740740740740741	-0.0305958132045089	1	1
GM18501	DXO	NM_005510.3	2	1	35	0.0952380952380952	0.214285714285714	-0.119047619047619	0.369070208728653	1
GM18501	DXO	NM_005510.3	5	4	35	0.291666666666667	0.363636363636364	-0.071969696969697	0.709143859477563	1
GM18501	DXO	NM_005510.3	6	5	73	0	0.0256410256410256	-0.0256410256410256	1	1
GM18501	DYNLL1	NM_001037495.1	1	2	62	0.3125	0.433333333333333	-0.120833333333333	0.43143473623751	1
GM18501	DYNLL1	NM_003746.2	1	2	62	0.3125	0.433333333333333	-0.120833333333333	0.43143473623751	1
GM18501	ECHS1	NM_004092.3	5	4	35	0.294117647058824	0.222222222222222	0.0718954248366013	0.711194256244312	1
GM18501	ECHS1	NM_004092.3	6	5	26	0.0909090909090909	0.133333333333333	-0.0424242424242424	1	1
GM18501	ECPAS	NM_001080398.1	50	49	113	0.962264150943396	1	-0.0377358490566038	0.217762326169406	1
GM18501	EDC4	NM_014329.4	20	21	39	0.0526315789473684	0.05	0.00263157894736842	1	1
GM18501	EDC4	NM_014329.4	21	22	55	0.80952380952381	0.764705882352941	0.0448179271708684	0.750484647741904	1
GM18501	EDC4	NM_014329.4	27	28	32	0.866666666666667	0.941176470588235	-0.0745098039215686	0.588709677419355	1
GM18501	EDEM1	NM_014674.2	10	11	52	0.0357142857142857	0	0.0357142857142857	1	1
GM18501	EDRF1	NM_001202438.1	20	21	29	0.5	0.266666666666667	0.233333333333333	0.263541913253899	1
GM18501	EEF1A1	NM_001402.5	2	1	188	0.819148936170213	0.765957446808511	0.0531914893617021	0.4721739780174	1
GM18501	EEF1A1	NM_001402.5	3	2	165	0.0555555555555556	0.421052631578947	-0.365497076023392	2.04859068221528e-08	3.58236771970125e-06
GM18501	EEF1A1	NM_001402.5	4	3	188	0.736842105263158	0.241071428571429	0.495770676691729	1.63964633096491e-11	4.18618104758651e-09
GM18501	EEF1A1	NM_001402.5	5	4	171	0.3	0.32967032967033	-0.0296703296703297	0.742629552994405	1
GM18501	EEF1A1	NM_001402.5	6	5	429	0.976470588235294	0.969111969111969	0.00735861912332503	0.770536404603772	1
GM18501	EEF1A1	NM_001402.5	7	6	352	0.165413533834586	0.0684931506849315	0.096920383149655	0.00649761303611099	0.250212003657541
GM18501	EEF1D	NM_001130053.2	6	5	40	0.260869565217391	0.470588235294118	-0.209718670076726	0.197843561024874	1
GM18501	EEF1D	NM_001130053.2	7	6	53	0.0434782608695652	0	0.0434782608695652	0.433962264150943	1
GM18501	EEF2	NM_001961.3	2	1	34	0.8	0.789473684210526	0.0105263157894737	1	1
GM18501	EEF2	NM_001961.3	3	2	38	0.125	0.272727272727273	-0.147727272727273	0.426209891105527	1
GM18501	EEF2	NM_001961.3	7	6	20	0.6	0.4	0.2	0.656281798696659	1
GM18501	EEF2	NM_001961.3	9	8	117	0.980392156862745	0.954545454545455	0.0258467023172905	0.631105499881638	1
GM18501	EEF2	NM_001961.3	10	9	161	0.128205128205128	0.168674698795181	-0.0404695705900525	0.51322036560476	1
GM18501	EEF2	NM_001961.3	11	10	71	0.3	0.317073170731707	-0.0170731707317073	1	1
GM18501	EEF2	NM_001961.3	12	11	168	0.172413793103448	0.0740740740740741	0.0983397190293742	0.0638727470887514	0.915115098722173
GM18501	EEF2	NM_001961.3	13	12	135	0.65	0.6	0.05	0.589586011282271	1
GM18501	EEF2	NM_001961.3	14	13	247	0.703125	0.756302521008403	-0.0531775210084033	0.391302815547147	1
GM18501	EFCAB14	NM_014774.2	8	7	34	0.105263157894737	0.133333333333333	-0.0280701754385965	1	1
GM18501	EGLN2	NM_053046.3	3	4	42	0.0416666666666667	0.0555555555555556	-0.0138888888888889	1	1
GM18501	EIF3B	NM_001037283.1	11	12	60	0	0.0416666666666667	-0.0416666666666667	0.4	1
GM18501	EIF3B	NM_001037283.1	13	14	64	0.521739130434783	0.975609756097561	-0.453870625662778	1.72909755099625e-05	0.0017162704497094
GM18501	EIF3D	NM_003753.3	11	10	33	0	0.0476190476190476	-0.0476190476190476	1	1
GM18501	EIF3F	NM_003754.2	4	5	27	0.916666666666667	0.866666666666667	0.0499999999999999	1	1
GM18501	EIF3F	NM_003754.2	5	6	26	0.333333333333333	0.214285714285714	0.119047619047619	0.665217391304348	1
GM18501	EIF3G	NM_003755.3	3	2	31	0.5	0.904761904761905	-0.404761904761905	0.0218476369755569	0.534244796335104
GM18501	EIF3G	NM_003755.3	6	5	136	0	0.0256410256410256	-0.0256410256410256	0.50718954248366	1
GM18501	EIF3G	NM_003755.3	7	6	301	0.976744186046512	0.982558139534884	-0.0058139534883721	1	1
GM18501	EIF3G	NM_003755.3	9	8	51	0.826086956521739	0.928571428571429	-0.102484472049689	0.390210978008225	1
GM18501	EIF3G	NM_003755.3	10	9	44	0.722222222222222	0.923076923076923	-0.200854700854701	0.103257550879726	1
GM18501	EIF3M	NM_001307929.1	2	3	88	0.974358974358974	1	-0.0256410256410257	0.443181818181818	1
GM18501	EIF4A2	NM_001967.3	4	5	23	0	0.0833333333333333	-0.0833333333333333	1	1
GM18501	EIF4B	NM_001300821.1	11	12	37	0.2	0.294117647058824	-0.0941176470588235	0.703388695602266	1
GM18501	EIF4B	NM_001300821.1	12	13	28	0	0.0714285714285714	-0.0714285714285714	1	1
GM18501	EIF4B	NM_001300821.1	13	14	34	0.823529411764706	0.764705882352941	0.0588235294117647	1	1
GM18501	EIF4G2	NM_001042559.2	2	1	75	0.305555555555556	0.435897435897436	-0.13034188034188	0.339585761632328	1
GM18501	EIF4G2	NM_001042559.2	4	3	228	0.0265486725663717	0	0.0265486725663717	0.120102017157431	1
GM18501	EIF4G2	NM_001042559.2	5	4	46	0.818181818181818	0.875	-0.0568181818181818	0.694271128757799	1
GM18501	EIF4G2	NM_001042559.2	6	5	82	0.0869565217391304	0.0277777777777778	0.0591787439613527	0.378666255016981	1
GM18501	EIF4G2	NM_001042559.2	7	6	111	0.982758620689655	0.905660377358491	0.0770982433311646	0.101523799371694	1
GM18501	EIF4G2	NM_001042559.2	8	7	43	0.130434782608696	0.2	-0.0695652173913044	0.686734598816278	1
GM18501	EIF4G2	NM_001042559.2	9	8	93	0.209302325581395	0.14	0.0693023255813953	0.419107164483259	1
GM18501	EIF4G2	NM_001042559.2	10	9	59	0.608695652173913	0.75	-0.141304347826087	0.264839148735436	1
GM18501	EIF4G2	NM_001042559.2	11	10	84	0.235294117647059	0.3	-0.0647058823529412	0.621005265168872	1
GM18501	EIF4G2	NM_001042559.2	12	11	64	0.333333333333333	0.264705882352941	0.0686274509803921	0.592817852612425	1
GM18501	EIF4G2	NM_001042559.2	14	13	55	0.0526315789473684	0.0277777777777778	0.0248538011695906	1	1
GM18501	EIF4G2	NM_001042559.2	15	14	97	0.96078431372549	0.956521739130435	0.00426257459505541	1	1
GM18501	EIF4G2	NM_001042559.2	16	15	91	0.605263157894737	0.716981132075472	-0.111717974180735	0.365975849564301	1
GM18501	EIF4G2	NM_001042559.2	17	16	140	0.951612903225806	0.91025641025641	0.0413564929693963	0.512091170435607	1
GM18501	EIF4G2	NM_001042559.2	18	17	192	0.0116279069767442	0	0.0116279069767442	0.447916666666667	1
GM18501	EIF4G2	NM_001042559.2	19	18	77	0.189189189189189	0.3	-0.110810810810811	0.299446381051054	1
GM18501	EIF4G2	NM_001042559.2	20	19	56	0.608695652173913	0.606060606060606	0.002635046113307	1	1
GM18501	EIF4G2	NM_001172705.1	13	12	74	0.727272727272727	0.865384615384615	-0.138111888111888	0.187379464359415	1
GM18501	EIF4G2	NM_001172705.1	14	13	61	0.238095238095238	0.05	0.188095238095238	0.0416233697796584	0.755908666834223
GM18501	EIF4G2	NM_001172705.1	15	14	67	0.115384615384615	0.0975609756097561	0.0178236397748593	1	1
GM18501	EIF5	NM_001969.4	2	3	62	0	0.03125	-0.03125	1	1
GM18501	EIPR1	NM_003310.2	6	5	25	0.153846153846154	0.0833333333333333	0.0705128205128205	1	1
GM18501	ELAC2	NM_001165962.1	9	8	34	0.941176470588235	1	-0.0588235294117647	1	1
GM18501	ELAC2	NM_001165962.1	14	13	33	0	0.0476190476190476	-0.0476190476190476	1	1
GM18501	ELAC2	NM_001165962.1	16	15	44	0.869565217391304	0.904761904761905	-0.0351966873706004	1	1
GM18501	ELAC2	NM_001165962.1	17	16	69	0.03125	0	0.03125	0.463768115942029	1
GM18501	ELAC2	NM_001165962.1	20	19	48	0	0.04	-0.04	1	1
GM18501	ELL3	NM_025165.2	6	5	20	0.1	0	0.1	1	1
GM18501	EMC9	NM_016049.3	2	1	33	0.294117647058824	0.125	0.169117647058824	0.39832136717565	1
GM18501	EML2	NM_001193269.1	2	1	38	0.05	0	0.05	1	1
GM18501	EMP3	NM_001313905.1	3	4	35	0.117647058823529	0	0.117647058823529	0.228571428571429	1
GM18501	ENOSF1	NM_001318760.1	13	12	28	0.0769230769230769	0	0.0769230769230769	0.464285714285714	1
GM18501	ENOSF1	NM_017512.5	6	5	92	0.0363636363636364	0.027027027027027	0.00933660933660933	1	1
GM18501	ENTPD1	NM_001098175.1	4	5	56	0.96969696969697	0.739130434782609	0.230566534914361	0.0154210421469023	0.440396674555439
GM18501	ENTPD1	NM_001098175.1	5	6	60	0.0277777777777778	0	0.0277777777777778	1	1
GM18501	ENTPD1	NM_001098175.1	8	9	35	1	0.95	0.05	1	1
GM18501	ENTPD6	NM_001114089.3	11	12	36	0.91304347826087	0.923076923076923	-0.0100334448160536	1	1
GM18501	ENTPD6	NM_001322380.1	10	11	35	1	0.857142857142857	0.142857142857143	0.152941176470588	1
GM18501	EPRS	NM_004446.2	31	30	38	0.0666666666666667	0	0.0666666666666667	0.394736842105263	1
GM18501	ERCC3	NM_000122.1	13	12	29	0.909090909090909	0.888888888888889	0.0202020202020202	1	1
GM18501	ERCC3	NM_000122.1	14	13	48	0.0416666666666667	0.0416666666666667	0	1	1
GM18501	ERCC5	NM_000123.3	2	3	30	0.923076923076923	1	-0.0769230769230769	0.433333333333333	1
GM18501	ERCC5	NM_000123.3	13	14	30	0.222222222222222	0.5	-0.277777777777778	0.139146910061453	1
GM18501	ESD	NM_001984.1	5	4	28	0	0.0769230769230769	-0.0769230769230769	0.464285714285714	1
GM18501	ESPL1	NM_012291.4	22	23	26	0.0833333333333333	0.428571428571429	-0.345238095238095	0.0808695652173913	1
GM18501	ESPL1	NM_012291.4	23	24	24	0	0.285714285714286	-0.285714285714286	0.113965744400527	1
GM18501	EVL	NM_016337.2	9	10	20	0.3	0.2	0.1	1	1
GM18501	EVL	NM_016337.2	12	13	46	1	0.947368421052632	0.0526315789473685	0.41304347826087	1
GM18501	EXOSC10	NM_001001998.2	15	14	84	0.954545454545455	1	-0.0454545454545454	0.495123350545037	1
GM18501	EXOSC10	NM_001001998.2	16	15	38	0.91304347826087	0.933333333333333	-0.0202898550724638	1	1
GM18501	EXOSC10	NM_001001998.2	21	20	32	0.05	0	0.05	1	1
GM18501	EXTL2	NM_001033025.2	3	2	28	0.0909090909090909	0	0.0909090909090909	0.392857142857143	1
GM18501	EXTL2	NM_001261440.1	3	2	28	0.0909090909090909	0	0.0909090909090909	0.392857142857143	1
GM18501	FAAP20	NM_001256946.1	2	1	32	0.117647058823529	0	0.117647058823529	0.485887096774194	1
GM18501	FADS2	NM_001281501.1	5	6	67	0	0.0526315789473684	-0.0526315789473684	0.501582994120308	1
GM18501	FADS2	NM_001281501.1	7	8	41	0.8	0.666666666666667	0.133333333333333	0.484077886516911	1
GM18501	FADS2	NM_001281501.1	10	11	96	0.9375	0.9375	0	1	1
GM18501	FAM102A	NM_001035254.2	10	9	25	0.181818181818182	0.0714285714285714	0.11038961038961	0.564782608695652	1
GM18501	FAM13B	NM_016603.3	18	17	38	0.666666666666667	0.45	0.216666666666667	0.209689139737019	1
GM18501	FAM160B2	NM_022749.5	3	4	34	0.0526315789473684	0	0.0526315789473684	1	1
GM18501	FAM160B2	NM_022749.5	12	13	49	0.0740740740740741	0.0909090909090909	-0.0168350168350168	1	1
GM18501	FAM160B2	NM_022749.5	13	14	36	0.956521739130435	0.769230769230769	0.187290969899666	0.123809523809524	1
GM18501	FAM160B2	NM_022749.5	15	16	37	1	0.933333333333333	0.0666666666666667	0.405405405405405	1
GM18501	FAM173A	NM_023933.2	2	3	72	0.763157894736842	0	0.763157894736842	1.87028069467946e-12	5.19023221911535e-10
GM18501	FAM173A	NM_023933.2	3	4	50	0.681818181818182	0.928571428571429	-0.246753246753247	0.0322592898786346	0.673008822558305
GM18501	FAM3C	NM_001040020.1	9	8	56	0	0.0434782608695652	-0.0434782608695652	0.410714285714286	1
GM18501	FANCA	NM_000135.2	25	24	35	0.2	0.12	0.08	0.61032800216861	1
GM18501	FANCA	NM_000135.2	27	26	24	0	0.0769230769230769	-0.0769230769230769	1	1
GM18501	FANCA	NM_000135.2	40	39	30	0.0588235294117647	0.0769230769230769	-0.0180995475113122	1	1
GM18501	FANCL	NM_001114636.1	8	7	73	0.0555555555555556	0.027027027027027	0.0285285285285285	0.614508971638048	1
GM18501	FANCL	NM_001114636.1	9	8	68	0.972222222222222	1	-0.0277777777777778	1	1
GM18501	FANCL	NM_018062.3	8	7	73	0.0555555555555556	0.027027027027027	0.0285285285285285	0.614508971638048	1
GM18501	FAS	NM_000043.5	4	5	51	0.888888888888889	0.875	0.0138888888888888	1	1
GM18501	FAS	NM_000043.5	6	7	68	0.454545454545454	0.428571428571429	0.025974025974026	1	1
GM18501	FAS	NM_152872.3	6	7	61	0.166666666666667	0.243243243243243	-0.0765765765765766	0.539046272613454	1
GM18501	FASTKD2	NM_001136193.1	10	11	28	1	0.941176470588235	0.0588235294117647	1	1
GM18501	FASTKD3	NM_024091.3	3	2	40	0	0.0909090909090909	-0.0909090909090909	0.492307692307692	1
GM18501	FBXO38	NM_001271723.1	16	17	49	0	0.0526315789473684	-0.0526315789473684	0.387755102040816	1
GM18501	FBXO38	NM_001271723.1	18	19	35	0	0.111111111111111	-0.111111111111111	0.485714285714286	1
GM18501	FCER2	NM_001207019.2	3	2	41	0.0454545454545455	0	0.0454545454545455	1	1
GM18501	FCER2	NM_001207019.2	5	4	21	0.818181818181818	0.9	-0.0818181818181818	1	1
GM18501	FCER2	NM_001207019.2	8	7	220	0.0365853658536585	0	0.0365853658536585	0.0505901036251671	0.829515760090943
GM18501	FCER2	NM_001207019.2	9	8	49	0.0952380952380952	0.25	-0.154761904761905	0.267000099647808	1
GM18501	FCGR2B	NM_001002273.2	3	4	76	0.0357142857142857	0.0208333333333333	0.0148809523809524	1	1
GM18501	FCGR2B	NM_001002273.2	4	5	53	0.954545454545455	1	-0.0454545454545454	0.415094339622642	1
GM18501	FCGR2B	NM_001002273.2	5	6	200	0	0.0173913043478261	-0.0173913043478261	0.508793969849246	1
GM18501	FCGR2B	NM_001002275.2	4	5	67	1	0.975609756097561	0.024390243902439	1	1
GM18501	FCGR2B	NM_001002275.2	6	7	205	0.0113636363636364	0.00854700854700855	0.00281662781662782	1	1
GM18501	FCHSD1	NM_033449.2	11	10	47	0.954545454545455	1	-0.0454545454545454	0.468085106382979	1
GM18501	FCHSD1	NM_033449.2	17	16	32	0.117647058823529	0	0.117647058823529	0.485887096774194	1
GM18501	FCHSD2	NM_014824.2	17	16	76	0.0465116279069767	0	0.0465116279069767	0.502105263157895	1
GM18501	FCHSD2	NM_014824.2	18	17	29	0	0.0769230769230769	-0.0769230769230769	0.448275862068966	1
GM18501	FCHSD2	NM_014824.2	19	18	26	0.75	0.928571428571429	-0.178571428571429	0.306086956521739	1
GM18501	FCRL5	NM_001195388.1	13	12	51	0.8	0.761904761904762	0.0380952380952382	0.744167919654609	1
GM18501	FDXR	NM_001258012.3	6	5	35	0.789473684210526	1	-0.210526315789474	0.108785332314744	1
GM18501	FDXR	NM_001258012.3	7	6	51	0.565217391304348	0.607142857142857	-0.0419254658385093	0.782796786694395	1
GM18501	FDXR	NM_001258012.3	8	7	31	0.5	0.666666666666667	-0.166666666666667	0.472547597169158	1
GM18501	FDXR	NM_001258012.3	9	8	39	0.222222222222222	0.285714285714286	-0.0634920634920635	0.725754628980435	1
GM18501	FDXR	NM_001258012.3	11	10	49	0.307692307692308	0.217391304347826	0.0903010033444816	0.532189880815893	1
GM18501	FDXR	NM_001258013.3	4	3	29	0.307692307692308	0.375	-0.0673076923076923	1	1
GM18501	FDXR	NM_004110.5	6	5	36	0.8	1	-0.2	0.113148289618878	1
GM18501	FDXR	NM_004110.5	7	6	52	0.541666666666667	0.607142857142857	-0.0654761904761905	0.779455198797385	1
GM18501	FERMT3	NM_031471.5	6	7	78	0.970588235294118	0.977272727272727	-0.00668449197860965	1	1
GM18501	FERMT3	NM_031471.5	7	8	69	0.0344827586206897	0.025	0.00948275862068965	1	1
GM18501	FERMT3	NM_031471.5	8	9	123	0.916666666666667	0.933333333333333	-0.0166666666666667	0.735345841179132	1
GM18501	FERMT3	NM_031471.5	9	10	111	0	0.0294117647058824	-0.0294117647058824	0.521048321048321	1
GM18501	FERMT3	NM_031471.5	10	11	317	1	0.994252873563218	0.00574712643678166	1	1
GM18501	FERMT3	NM_031471.5	11	12	270	0.114754098360656	0.114864864864865	-0.000110766504209131	1	1
GM18501	FERMT3	NM_178443.2	8	9	123	0.916666666666667	0.933333333333333	-0.0166666666666667	0.735345841179132	1
GM18501	FERMT3	NM_178443.2	9	10	111	0	0.0294117647058824	-0.0294117647058824	0.521048321048321	1
GM18501	FGD3	NM_001083536.1	15	16	53	0.941176470588235	0.578947368421053	0.362229102167183	0.00234035072846097	0.112104117163859
GM18501	FGD3	NM_001286993.1	15	16	53	0.941176470588235	0.578947368421053	0.362229102167183	0.00234035072846097	0.112104117163859
GM18501	FKBP1A	NM_000801.4	4	3	31	0.75	0.8	-0.05	1	1
GM18501	FKBP8	NM_001308373.1	5	4	29	0.833333333333333	0.823529411764706	0.00980392156862753	1	1
GM18501	FKBP8	NM_012181.4	5	4	29	0.833333333333333	0.823529411764706	0.00980392156862753	1	1
GM18501	FPGS	NM_001018078.2	8	9	43	0	0.0476190476190476	-0.0476190476190476	0.488372093023256	1
GM18501	FRA10AC1	NM_145246.4	13	12	57	0	0.0333333333333333	-0.0333333333333333	1	1
GM18501	FUCA2	NM_032020.4	3	2	30	1	0.944444444444444	0.0555555555555556	1	1
GM18501	GALT	NM_000155.3	1	2	100	0.885245901639344	0.923076923076923	-0.0378310214375789	0.736167780023544	1
GM18501	GALT	NM_000155.3	2	3	57	0.384615384615385	0.451612903225806	-0.0669975186104218	0.788158085301767	1
GM18501	GALT	NM_000155.3	3	4	70	0.86046511627907	0.925925925925926	-0.0654608096468562	0.472324207837816	1
GM18501	GALT	NM_000155.3	4	5	143	0	0.0166666666666667	-0.0166666666666667	0.41958041958042	1
GM18501	GALT	NM_000155.3	7	8	82	0.72	0.8125	-0.0925	0.433212270151319	1
GM18501	GALT	NM_000155.3	8	9	57	0.764705882352941	0.391304347826087	0.373401534526854	0.00616022320946207	0.241221869264994
GM18501	GAPDH	NM_001256799.2	1	2	159	0.0144927536231884	0	0.0144927536231884	0.433962264150943	1
GM18501	GAPDH	NM_001256799.2	2	3	427	0.940092165898618	0.952380952380952	-0.0122887864823348	0.670035542106603	1
GM18501	GAPDH	NM_001256799.2	3	4	353	0.447058823529412	0.387978142076503	0.0590806814529091	0.280891456506378	1
GM18501	GAPDH	NM_001256799.2	4	5	362	0.209944751381215	0.265193370165746	-0.0552486187845304	0.26631227344667	1
GM18501	GAPDH	NM_001256799.2	5	6	538	0.801470588235294	0.763157894736842	0.038312693498452	0.297189184889411	1
GM18501	GAPDH	NM_001256799.2	6	7	815	0.0208333333333333	0.00522193211488251	0.0156114012184508	0.0688878223151658	0.935518612515159
GM18501	GAPDH	NM_001289745.1	2	3	218	0.333333333333333	0.224137931034483	0.109195402298851	0.0942390751885707	1
GM18501	GAPDH	NM_002046.5	1	2	200	0.737373737373737	0.821782178217822	-0.0844084408440844	0.173578101277277	1
GM18501	GARS	NM_001316772.1	13	14	32	0.769230769230769	0.947368421052632	-0.178137651821862	0.278781979977753	1
GM18501	GARS	NM_001316772.1	14	15	51	0	0.0740740740740741	-0.0740740740740741	0.491764705882353	1
GM18501	GARS	NM_001316772.1	15	16	58	0.032258064516129	0	0.032258064516129	1	1
GM18501	GBA2	NM_020944.2	4	3	38	0.2	0	0.2	0.0539355144618302	0.851281879071992
GM18501	GBA2	NM_020944.2	5	4	38	0.181818181818182	0.3125	-0.130681818181818	0.44966408533771	1
GM18501	GBA2	NM_020944.2	6	5	50	1	0.956521739130435	0.0434782608695652	0.46	1
GM18501	GBA2	NM_020944.2	7	6	65	0.0277777777777778	0.0344827586206897	-0.00670498084291188	1	1
GM18501	GBA2	NM_020944.2	12	11	89	0.98	0.974358974358974	0.00564102564102564	1	1
GM18501	GBA2	NM_020944.2	13	12	77	0.794871794871795	0.894736842105263	-0.0998650472334683	0.347100107512167	1
GM18501	GBP1	NM_002053.2	4	3	46	0.956521739130435	1	-0.0434782608695652	1	1
GM18501	GBP1	NM_002053.2	5	4	56	0.857142857142857	0.952380952380952	-0.0952380952380952	0.393243025318497	1
GM18501	GBP1	NM_002053.2	7	6	46	0.966666666666667	1	-0.0333333333333333	1	1
GM18501	GBP1	NM_002053.2	8	7	33	0.777777777777778	0.933333333333333	-0.155555555555556	0.345674486803519	1
GM18501	GBP1	NM_002053.2	9	8	73	0.0476190476190476	0.129032258064516	-0.0814132104454685	0.391119222311646	1
GM18501	GFI1	NM_001127215.1	2	1	26	0	0.0625	-0.0625	1	1
GM18501	GFI1	NM_001127215.1	6	5	59	0.142857142857143	0.387096774193548	-0.244239631336406	0.0439278777642798	0.773971552121751
GM18501	GFI1	NM_001127216.1	2	1	26	0.0909090909090909	0	0.0909090909090909	0.423076923076923	1
GM18501	GFI1	NM_005263.3	2	1	26	0	0.0625	-0.0625	1	1
GM18501	GGA1	NM_001001560.2	10	11	25	1	0.833333333333333	0.166666666666667	0.22	1
GM18501	GGA1	NM_001001560.2	11	12	29	0	0.0555555555555556	-0.0555555555555556	1	1
GM18501	GGA1	NM_001172687.1	11	12	37	0	0.0666666666666667	-0.0666666666666667	0.405405405405405	1
GM18501	GGA1	NM_001172687.1	12	13	25	1	0.833333333333333	0.166666666666667	0.22	1
GM18501	GGA1	NM_001172687.1	13	14	29	0	0.0555555555555556	-0.0555555555555556	1	1
GM18501	GGA2	NM_015044.4	3	2	86	0.96875	0.851851851851852	0.116898148148148	0.1446160122443	1
GM18501	GGA2	NM_015044.4	11	10	23	0.153846153846154	0.1	0.0538461538461538	1	1
GM18501	GGA3	NM_001172703.2	8	7	90	0.978723404255319	0.976744186046512	0.00197921820880753	1	1
GM18501	GGA3	NM_001172703.2	9	8	103	0.318181818181818	0.271186440677966	0.0469953775038521	0.663983274583774	1
GM18501	GGA3	NM_001172703.2	10	9	93	0	0.0454545454545455	-0.0454545454545455	0.221131369798971	1
GM18501	GGA3	NM_001172703.2	11	10	185	0.988888888888889	0.989473684210526	-0.000584795321637355	1	1
GM18501	GGA3	NM_001172703.2	12	11	159	0.027027027027027	0.0352941176470588	-0.0082670906200318	1	1
GM18501	GGA3	NM_001172703.2	13	12	81	0.0454545454545455	0.027027027027027	0.0184275184275184	1	1
GM18501	GGA3	NM_001172703.2	15	14	24	0.0833333333333333	0.25	-0.166666666666667	0.590062111801242	1
GM18501	GGA3	NM_001172703.2	16	15	134	1	0.968253968253968	0.0317460317460317	0.219167321288295	1
GM18501	GGCT	NM_024051.3	3	2	24	0.571428571428571	0.4	0.171428571428571	0.680172297752053	1
GM18501	GIGYF1	NM_022574.4	19	18	36	1	0.928571428571429	0.0714285714285714	0.388888888888889	1
GM18501	GLCCI1	NM_138426.3	6	7	42	0.523809523809524	0.666666666666667	-0.142857142857143	0.530264956619443	1
GM18501	GLRX	NM_001118890.1	2	1	55	0.032258064516129	0.166666666666667	-0.134408602150538	0.155751142432607	1
GM18501	GLRX	NM_001243659.1	2	1	55	0.032258064516129	0.166666666666667	-0.134408602150538	0.155751142432607	1
GM18501	GLYR1	NM_001308096.1	13	12	26	0	0.1	-0.1	0.384615384615385	1
GM18501	GLYR1	NM_001308096.1	14	13	26	0.0769230769230769	0	0.0769230769230769	1	1
GM18501	GMIP	NM_001288998.1	19	18	58	0.625	0.884615384615385	-0.259615384615385	0.0350890446615863	0.703648611085809
GM18501	GMIP	NM_016573.3	14	13	28	0.923076923076923	1	-0.0769230769230769	0.464285714285714	1
GM18501	GMNN	NM_001251989.1	2	3	50	0.09375	0.0555555555555556	0.0381944444444444	1	1
GM18501	GMNN	NM_001251989.1	3	4	47	0.416666666666667	0.434782608695652	-0.0181159420289855	1	1
GM18501	GMNN	NM_001251989.1	4	5	101	0	0.0172413793103448	-0.0172413793103448	1	1
GM18501	GMPPA	NM_013335.3	3	4	44	0.96	0.947368421052632	0.0126315789473684	1	1
GM18501	GMPPA	NM_013335.3	8	9	46	0.7	0.846153846153846	-0.146153846153846	0.292207692661465	1
GM18501	GNAS	NM_000516.5	3	4	268	0.00735294117647059	0	0.00735294117647059	1	1
GM18501	GNAS	NM_000516.5	5	6	45	0.863636363636364	0.956521739130435	-0.0928853754940712	0.34625322997416	1
GM18501	GNAS	NM_000516.5	6	7	232	0	0.00819672131147541	-0.00819672131147541	1	1
GM18501	GNAS	NM_000516.5	7	8	56	0.555555555555556	0.724137931034483	-0.168582375478927	0.265646883006986	1
GM18501	GNAS	NM_000516.5	8	9	65	0.861111111111111	0.655172413793103	0.205938697318008	0.0753840234225936	0.972218338681754
GM18501	GNAS	NM_000516.5	9	10	85	0.0196078431372549	0.0588235294117647	-0.0392156862745098	0.561101549053356	1
GM18501	GNAS	NM_000516.5	10	11	30	0.636363636363636	0.473684210526316	0.162679425837321	0.4664001332667	1
GM18501	GNAS	NM_000516.5	11	12	29	0.166666666666667	0.352941176470588	-0.186274509803922	0.408347108497034	1
GM18501	GNAS	NM_001077488.3	3	4	267	0.00735294117647059	0	0.00735294117647059	1	1
GM18501	GNAS	NM_001077489.3	2	3	270	0.0145985401459854	0.0075187969924812	0.0070797431535042	1	1
GM18501	GNAS	NM_080426.3	2	3	269	0.0145985401459854	0.00757575757575758	0.00702278257022783	1	1
GM18501	GNB2	NM_005273.3	4	5	22	0	0.0909090909090909	-0.0909090909090909	1	1
GM18501	GNL3	NM_014366.4	6	7	203	0.97979797979798	0.961538461538462	0.0182595182595182	0.683377328543832	1
GM18501	GNL3	NM_014366.4	7	8	169	0.0123456790123457	0.0568181818181818	-0.0444725028058361	0.212784032930128	1
GM18501	GNL3	NM_014366.4	8	9	47	0.0909090909090909	0.32	-0.229090909090909	0.0786145101202849	0.996922443480475
GM18501	GNL3	NM_014366.4	9	10	90	0.58695652173913	0.5	0.0869565217391305	0.525685773066844	1
GM18501	GNL3	NM_014366.4	10	11	126	0.840579710144927	0.842105263157895	-0.0015255530129672	1	1
GM18501	GNL3	NM_014366.4	12	13	35	0.380952380952381	0.5	-0.119047619047619	0.510826038593606	1
GM18501	GNL3	NM_014366.4	13	14	40	0.833333333333333	0.8125	0.0208333333333334	1	1
GM18501	GOLT1B	NM_016072.4	1	2	27	1	0.916666666666667	0.0833333333333334	0.444444444444444	1
GM18501	GORASP1	NM_031899.3	4	3	22	0.181818181818182	0.0909090909090909	0.0909090909090909	1	1
GM18501	GPAA1	NM_003801.3	4	5	53	0.93939393939394	0.95	-0.0106060606060605	1	1
GM18501	GPAA1	NM_003801.3	5	6	83	0.840909090909091	0.923076923076923	-0.0821678321678322	0.322134106044431	1
GM18501	GPAA1	NM_003801.3	6	7	126	0.0615384615384615	0.0655737704918033	-0.00403530895334174	1	1
GM18501	GPAA1	NM_003801.3	7	8	160	1	0.985915492957746	0.0140845070422535	0.44375	1
GM18501	GPAA1	NM_003801.3	8	9	76	0.371428571428571	0.609756097560976	-0.238327526132404	0.0649060233863302	0.922156751851083
GM18501	GPAA1	NM_003801.3	9	10	188	0.378640776699029	0.529411764705882	-0.150770988006853	0.040762687142966	0.749792626402784
GM18501	GPAA1	NM_003801.3	10	11	259	0.115942028985507	0.0247933884297521	0.0911486405557552	0.00710854213401367	0.268871391442226
GM18501	GPC2	NM_152742.2	9	8	39	0.181818181818182	0.0714285714285714	0.11038961038961	0.561877667140825	1
GM18501	GPR108	NM_001080452.1	8	7	50	0.903225806451613	0.947368421052632	-0.0441426146010186	1	1
GM18501	GPR108	NM_001080452.1	9	8	104	0.696428571428571	0.729166666666667	-0.0327380952380952	0.828858757934642	1
GM18501	GPR108	NM_001080452.1	10	9	74	0.782608695652174	0.857142857142857	-0.0745341614906831	0.546975087377607	1
GM18501	GPR108	NM_001080452.1	13	12	45	0.32258064516129	0.5	-0.17741935483871	0.326194600726648	1
GM18501	GPR108	NM_001080452.1	14	13	98	0.983050847457627	0.974358974358974	0.00869187309865282	1	1
GM18501	GPR108	NM_001080452.1	15	14	93	0.0740740740740741	0.0256410256410256	0.0484330484330484	0.394710478861952	1
GM18501	GPR108	NM_001080452.1	16	15	30	0	0.3	-0.3	0.0295566502463054	0.642038307534785
GM18501	GPR108	NM_001080452.1	17	16	32	0.95	0.916666666666667	0.0333333333333333	1	1
GM18501	GPS2	NM_004489.4	4	3	55	0.235294117647059	0.157894736842105	0.0773993808049536	0.479201628490372	1
GM18501	GPX4	NM_001039847.2	1	2	23	0.1	0.0769230769230769	0.0230769230769231	1	1
GM18501	GPX4	NM_001039848.2	1	2	22	0.1	0	0.1	0.454545454545454	1
GM18501	GRHPR	NM_012203.1	6	7	57	0.956521739130435	0.970588235294118	-0.0140664961636828	1	1
GM18501	GRHPR	NM_012203.1	7	8	61	0	0.0256410256410256	-0.0256410256410256	1	1
GM18501	GRN	NM_002087.3	1	2	225	0.0078740157480315	0.0102040816326531	-0.00233006588462156	1	1
GM18501	GRN	NM_002087.3	3	4	101	0.981132075471698	1	-0.0188679245283019	1	1
GM18501	GRN	NM_002087.3	4	5	116	0.0166666666666667	0	0.0166666666666667	1	1
GM18501	GRN	NM_002087.3	6	7	32	0.928571428571429	0.888888888888889	0.0396825396825398	1	1
GM18501	GRN	NM_002087.3	7	8	62	0.75	0.785714285714286	-0.0357142857142857	0.754835274905634	1
GM18501	GRN	NM_002087.3	8	9	77	0.59375	0.4	0.19375	0.109894475532545	1
GM18501	GRN	NM_002087.3	9	10	111	0.659574468085106	0.640625	0.0189494680851063	1	1
GM18501	GRN	NM_002087.3	11	12	43	0.894736842105263	0.875	0.0197368421052632	1	1
GM18501	GSDME	NM_001127453.1	9	8	88	0	0.0714285714285714	-0.0714285714285714	0.159090909090909	1
GM18501	GSE1	NM_001134473.2	8	9	24	0.909090909090909	1	-0.0909090909090909	0.458333333333333	1
GM18501	GSTM4	NM_000850.4	3	4	32	0.166666666666667	0.05	0.116666666666667	0.540322580645161	1
GM18501	GSTM4	NM_000850.4	5	6	25	0.846153846153846	1	-0.153846153846154	0.48	1
GM18501	GSTP1	NM_000852.3	1	2	61	0.368421052631579	0.523809523809524	-0.155388471177945	0.284267671741377	1
GM18501	GSTP1	NM_000852.3	2	3	157	0	0.0158730158730159	-0.0158730158730159	0.401273885350318	1
GM18501	GSTP1	NM_000852.3	4	5	213	0.0185185185185185	0.019047619047619	-0.000529100529100532	1	1
GM18501	GSTP1	NM_000852.3	5	6	89	0.538461538461538	0.44	0.0984615384615384	0.397690655246169	1
GM18501	GTF3A	NM_002097.2	5	6	59	0.03125	0	0.03125	1	1
GM18501	GTF3C5	NM_001122823.1	10	11	29	0.117647058823529	0	0.117647058823529	0.497536945812808	1
GM18501	GTF3C5	NM_001286709.1	6	7	24	0.153846153846154	0	0.153846153846154	0.481884057971015	1
GM18501	GTPBP3	NM_001128855.2	3	4	25	0.933333333333333	1	-0.0666666666666667	1	1
GM18501	GTPBP3	NM_001128855.2	4	5	29	0.7	0.736842105263158	-0.0368421052631579	1	1
GM18501	GTPBP3	NM_001128855.2	5	6	37	0.294117647058824	0.2	0.0941176470588235	0.703388695602266	1
GM18501	GTPBP3	NM_001128855.2	6	7	23	0.615384615384615	0.7	-0.0846153846153845	1	1
GM18501	GTPBP3	NM_001195422.1	6	7	26	0.615384615384615	0.538461538461538	0.076923076923077	1	1
GM18501	GTPBP3	NM_133644.3	4	5	27	0.363636363636364	0.375	-0.0113636363636364	1	1
GM18501	GUCY1B1	NM_000857.3	9	10	34	0	0.1	-0.1	0.500891265597148	1
GM18501	GUK1	NM_000858.5	2	3	34	0.333333333333333	0.25	0.0833333333333333	0.714591970876732	1
GM18501	GUK1	NM_000858.5	3	4	120	0.981132075471698	1	-0.0188679245283019	0.441666666666667	1
GM18501	GUK1	NM_000858.5	5	6	102	0.897959183673469	0.943396226415094	-0.045437042741625	0.475986090198819	1
GM18501	GUK1	NM_000858.5	6	7	83	0.236842105263158	0.177777777777778	0.0590643274853801	0.589766559572167	1
GM18501	GUK1	NM_000858.5	7	8	24	0.307692307692308	0.272727272727273	0.034965034965035	1	1
GM18501	GUK1	NM_001159390.1	1	2	122	0.813559322033898	0.80952380952381	0.00403551251008882	1	1
GM18501	GUK1	NM_001242840.1	5	6	26	0.416666666666667	0.5	-0.0833333333333333	0.712688114147261	1
GM18501	H2AFY	NM_001040158.1	7	6	65	0.037037037037037	0.0526315789473684	-0.0155945419103314	1	1
GM18501	H2AFZ	NM_002106.3	2	1	55	1	0.967741935483871	0.032258064516129	1	1
GM18501	HAGHL	NM_001290137.1	2	3	23	0.583333333333333	0.727272727272727	-0.143939393939394	0.666846143491722	1
GM18501	HAGHL	NM_001290137.1	3	4	33	0.789473684210526	0.642857142857143	0.146616541353383	0.442123571645262	1
GM18501	HAGHL	NM_001290137.1	4	5	30	0.875	0.928571428571429	-0.0535714285714286	1	1
GM18501	HAGHL	NM_001290137.1	6	7	32	0.941176470588235	0.933333333333333	0.00784313725490193	1	1
GM18501	HAGHL	NM_001290139.1	1	2	57	0.0303030303030303	0.0833333333333333	-0.053030303030303	0.566917293233083	1
GM18501	HAGHL	NM_001323635.1	1	2	55	0	0.0434782608695652	-0.0434782608695652	0.418181818181818	1
GM18501	HCLS1	NM_001292041.1	11	10	24	1	0.9	0.1	0.416666666666667	1
GM18501	HCLS1	NM_005335.5	6	5	146	0.0140845070422535	0	0.0140845070422535	0.486301369863014	1
GM18501	HCLS1	NM_005335.5	8	7	40	0.08	0	0.08	0.519230769230769	1
GM18501	HDAC10	NM_001159286.1	2	1	29	0.818181818181818	0.777777777777778	0.0404040404040404	1	1
GM18501	HDAC10	NM_001159286.1	6	5	31	0.916666666666667	1	-0.0833333333333334	0.387096774193548	1
GM18501	HDAC10	NM_001159286.1	10	9	37	0.733333333333333	0.636363636363636	0.0969696969696969	0.723536662357575	1
GM18501	HDAC10	NM_001159286.1	11	10	40	0.333333333333333	0.392857142857143	-0.0595238095238095	1	1
GM18501	HDAC10	NM_001159286.1	14	13	43	0.0526315789473684	0.0833333333333333	-0.0307017543859649	1	1
GM18501	HDAC10	NM_001159286.1	15	14	50	0.6	0.64	-0.04	1	1
GM18501	HDAC10	NM_001159286.1	16	15	34	0.0769230769230769	0	0.0769230769230769	0.382352941176471	1
GM18501	HDAC10	NM_001159286.1	17	16	76	0.96551724137931	1	-0.0344827586206896	0.381578947368421	1
GM18501	HDDC3	NM_001286451.1	2	1	35	0.181818181818182	0	0.181818181818182	0.273529411764706	1
GM18501	HDLBP	NM_001243900.2	18	17	43	1	0.956521739130435	0.0434782608695652	1	1
GM18501	HDLBP	NM_001243900.2	19	18	46	0.0909090909090909	0.0833333333333333	0.00757575757575758	1	1
GM18501	HDLBP	NM_001243900.2	21	20	36	0.411764705882353	0.31578947368421	0.0959752321981424	0.730134717587443	1
GM18501	HDLBP	NM_001243900.2	22	21	37	0.55	0.588235294117647	-0.038235294117647	1	1
GM18501	HDLBP	NM_001243900.2	23	22	40	0.294117647058824	0.434782608695652	-0.140664961636829	0.511522646116639	1
GM18501	HDLBP	NM_001243900.2	26	25	61	1	0.90625	0.09375	0.239344262295082	1
GM18501	HDLBP	NM_001243900.2	27	26	77	0.475	0.297297297297297	0.177702702702703	0.160413504302434	1
GM18501	HDLBP	NM_001320965.1	8	7	66	1	0.9375	0.0625	0.231235431235431	1
GM18501	HELZ2	NM_001037335.2	10	9	37	0.263157894736842	0.388888888888889	-0.125730994152047	0.495054565132429	1
GM18501	HELZ2	NM_001037335.2	11	10	25	0.1	0.133333333333333	-0.0333333333333333	1	1
GM18501	HELZ2	NM_001037335.2	12	11	20	0.3	0.6	-0.3	0.369849964277209	1
GM18501	HELZ2	NM_001037335.2	18	17	38	0.8125	0.863636363636364	-0.0511363636363636	0.682034976152623	1
GM18501	HELZ2	NM_001037335.2	19	18	49	0	0.0645161290322581	-0.0645161290322581	0.525510204081633	1
GM18501	HEMK1	NM_001317851.1	8	9	22	0.1	0.166666666666667	-0.0666666666666667	1	1
GM18501	HERPUD1	NM_001010989.2	2	3	24	0.785714285714286	1	-0.214285714285714	0.239130434782609	1
GM18501	HERPUD1	NM_001010989.2	3	4	35	0	0.2	-0.2	0.118601986249045	1
GM18501	HERPUD1	NM_001010989.2	4	5	30	0.25	0.111111111111111	0.138888888888889	0.364405709233295	1
GM18501	HERPUD1	NM_001010989.2	5	6	29	0.75	0.538461538461538	0.211538461538462	0.270136360391233	1
GM18501	HERPUD1	NM_001010989.2	6	7	73	0.0882352941176471	0.102564102564103	-0.0143288084464555	1	1
GM18501	HERPUD1	NM_001272103.1	2	3	24	0.785714285714286	1	-0.214285714285714	0.239130434782609	1
GM18501	HEXA	NM_000520.5	11	10	26	0.3125	0.1	0.2125	0.352386743691092	1
GM18501	HEXA	NM_000520.5	12	11	166	0.985507246376812	1	-0.0144927536231884	0.41566265060241	1
GM18501	HEXA	NM_000520.5	13	12	182	0.0340909090909091	0.0319148936170213	0.00217601547388781	1	1
GM18501	HGS	NM_004712.4	1	2	58	0	0.0714285714285714	-0.0714285714285714	0.228675136116152	1
GM18501	HGS	NM_004712.4	8	9	40	0.523809523809524	0.789473684210526	-0.265664160401002	0.104611981280502	1
GM18501	HGS	NM_004712.4	11	12	87	0.847826086956522	0.780487804878049	0.0673382820784729	0.580412831005075	1
GM18501	HGS	NM_004712.4	13	14	27	1	0.941176470588235	0.0588235294117647	1	1
GM18501	HGS	NM_004712.4	14	15	88	0.975609756097561	0.893617021276596	0.0819927348209653	0.209154148110407	1
GM18501	HGS	NM_004712.4	16	17	136	0.953125	0.986111111111111	-0.0329861111111112	0.342088320009858	1
GM18501	HIP1R	NM_003959.2	25	26	59	0	0.075	-0.075	0.544126241963764	1
GM18501	HJURP	NM_001282962.1	5	4	25	0	0.25	-0.25	0.0956521739130434	1
GM18501	HJURP	NM_018410.4	4	3	73	0	0.027027027027027	-0.027027027027027	1	1
GM18501	HLA-A	NM_002116.7	1	2	1794	0.734317343173432	0.983585029546947	-0.249267686373515	4.95437788374817e-42	3.61400633571356e-39
GM18501	HLA-A	NM_002116.7	2	3	2131	0.0243161094224924	0.00665926748057714	0.0176568419419153	0.00680808308004593	0.260595455947005
GM18501	HLA-A	NM_002116.7	3	4	431	0.506024096385542	0.270114942528736	0.235909153856806	6.59842165188818e-05	0.00571065434557142
GM18501	HLA-A	NM_002116.7	4	5	1778	0.989100817438692	0.994330262225372	-0.00522944478668008	0.283962458345884	1
GM18501	HLA-A	NM_002116.7	5	6	1385	0.265017667844523	0.107985480943739	0.157032186900784	1.93291872966068e-10	4.44588721504205e-08
GM18501	HLA-A	NM_002116.7	6	7	1119	0.824120603015075	0.916304347826087	-0.0921837448110116	0.000224878664072488	0.0165457555401576
GM18501	HLA-B	NM_005514.7	2	1	2724	0.105110896817743	0.863070539419087	-0.757959642601344	0	0
GM18501	HLA-B	NM_005514.7	3	2	2348	0.386587771203156	0.044541010320478	0.342046760882678	2.8981599594056e-80	3.08303841348268e-77
GM18501	HLA-B	NM_005514.7	4	3	3029	0.87987987987988	0.0129640542133176	0.866915825666562	0	0
GM18501	HLA-B	NM_005514.7	5	4	1657	0.104129263913824	0.939226519337017	-0.835097255423193	4.97928553576731e-263	1.4125126557075e-259
GM18501	HLA-B	NM_005514.7	6	5	1373	0.151709401709402	0.231121281464531	-0.0794118797551292	0.000462299375173955	0.0310867693678095
GM18501	HLA-B	NM_005514.7	7	6	1476	0.00134952766531714	0.00816326530612245	-0.00681373764080531	0.0686610037853655	0.935165014694087
GM18501	HLA-C	NM_002117.5	2	1	1176	0.912955465587044	0.964809384164223	-0.0518539185771784	0.000190166005121014	0.0143219123207805
GM18501	HLA-C	NM_002117.5	3	2	2023	0.0207182320441989	0	0.0207182320441989	1.84215472677506e-07	2.79952692436274e-05
GM18501	HLA-C	NM_002117.5	4	3	407	0.560260586319218	0.27	0.290260586319218	5.35682894685507e-07	7.35506734723121e-05
GM18501	HLA-C	NM_002117.5	5	4	202	0.830769230769231	0.91970802919708	-0.0889387984278495	0.088072677337048	1
GM18501	HLA-C	NM_002117.5	6	5	662	0.0174081237911025	0.268965517241379	-0.251557393450277	6.91577019689325e-20	3.09765840169968e-17
GM18501	HLA-C	NM_002117.5	7	6	356	0.0217391304347826	0.0581395348837209	-0.0364004044489383	0.102058454950554	1
GM18501	HLA-DMB	NM_002118.4	2	1	23	1	0.818181818181818	0.181818181818182	0.217391304347826	1
GM18501	HLA-DMB	NM_002118.4	3	2	79	0.974358974358974	1	-0.0256410256410257	0.493670886075949	1
GM18501	HLA-DMB	NM_002118.4	4	3	96	0.0930232558139535	0.0566037735849057	0.0364194822290478	0.696812235303377	1
GM18501	HLA-DMB	NM_002118.4	5	4	94	0	0.05	-0.05	0.178448867536033	1
GM18501	HLA-DOB	NM_002120.3	3	2	40	0.928571428571429	0.961538461538462	-0.032967032967033	1	1
GM18501	HLA-DPA1	NM_001242524.1	3	2	114	0.98019801980198	0.153846153846154	0.826351865955826	9.12001860526149e-12	2.42544994803053e-09
GM18501	HLA-DPA1	NM_001242524.1	4	3	139	0.037037037037037	0.806451612903226	-0.769414575866189	5.81340712743091e-18	2.3939047962974e-15
GM18501	HLA-DPA1	NM_001242524.1	5	4	45	0.703703703703704	0.944444444444444	-0.240740740740741	0.0643769558299218	0.918931718309593
GM18501	HLA-DPB1	NM_002121.5	1	2	25	0.0666666666666667	0.5	-0.433333333333333	0.0225296442687747	0.545217391304348
GM18501	HLA-DPB1	NM_002121.5	2	3	132	0.464285714285714	0	0.464285714285714	1.16229248376415e-10	2.74763790768356e-08
GM18501	HLA-DQA1	NM_002122.3	2	3	65	0.942307692307692	0.692307692307692	0.25	0.0252790126887098	0.584600066082836
GM18501	HLA-DQB1	NM_001243961.1	2	1	80	1	0.928571428571429	0.0714285714285714	0.242405063291139	1
GM18501	HLA-DQB1	NM_001243961.1	3	2	222	0.295454545454545	0	0.295454545454545	2.67218339715163e-12	7.33586175405143e-10
GM18501	HLA-DQB1	NM_002123.4	4	3	121	0.142857142857143	0.702702702702703	-0.55984555984556	2.63704914872707e-09	5.25988295438678e-07
GM18501	HLA-DRA	NM_019111.4	1	2	75	0.351351351351351	0.184210526315789	0.167140825035562	0.122709884393669	1
GM18501	HLA-DRA	NM_019111.4	2	3	62	0.40625	0.466666666666667	-0.0604166666666667	0.798138877677887	1
GM18501	HLA-DRA	NM_019111.4	3	4	57	0.3	0.185185185185185	0.114814814814815	0.368573725207297	1
GM18501	HLA-DRB1	NM_002124.3	2	1	74	0.4375	0.142857142857143	0.294642857142857	0.00760939096902994	0.284028305307461
GM18501	HLA-DRB1	NM_002124.3	3	2	257	0.102439024390244	0.25	-0.147560975609756	0.0100431251406349	0.33693958996787
GM18501	HLA-DRB1	NM_002124.3	4	3	65	0.0476190476190476	0.260869565217391	-0.213250517598344	0.0193570218218256	0.501221221230252
GM18501	HMGB2	NM_002129.3	2	1	23	0.0833333333333333	0	0.0833333333333333	1	1
GM18501	HMGCR	NM_000859.2	15	16	29	1	0.75	0.25	0.106732348111658	1
GM18501	HMGCR	NM_000859.2	16	17	45	0.333333333333333	0.166666666666667	0.166666666666667	0.298882197350717	1
GM18501	HMGCR	NM_000859.2	17	18	72	1	0.96969696969697	0.0303030303030303	0.458333333333333	1
GM18501	HMGCS1	NM_001098272.2	3	2	47	0.952380952380952	1	-0.0476190476190477	0.446808510638298	1
GM18501	HMGCS1	NM_001098272.2	5	4	100	0.104166666666667	0.0192307692307692	0.0849358974358974	0.102067526561752	1
GM18501	HMGCS1	NM_001098272.2	6	5	29	0	0.0588235294117647	-0.0588235294117647	1	1
GM18501	HMGCS1	NM_001098272.2	9	8	27	0.4	0.705882352941177	-0.305882352941176	0.223798627002288	1
GM18501	HMGCS1	NM_002130.7	2	1	31	0.9375	1	-0.0625	1	1
GM18501	HMGN1	NM_004965.6	2	1	123	0.666666666666667	0.62962962962963	0.037037037037037	0.706069223801924	1
GM18501	HMGN1	NM_004965.6	3	2	104	0.432835820895522	0.513513513513513	-0.0806776926179911	0.538164373124893	1
GM18501	HMGN1	NM_004965.6	4	3	119	0.805555555555556	0.872340425531915	-0.0667848699763594	0.453854268770662	1
GM18501	HMGN3	NM_001201362.1	4	3	68	0.894736842105263	0.833333333333333	0.0614035087719298	0.4934242617332	1
GM18501	HNF1B	NM_000458.3	7	6	30	0.8	0.6	0.2	0.426986506746627	1
GM18501	HNRNPA2B1	NM_002137.3	2	1	146	0.0142857142857143	0.0131578947368421	0.00112781954887218	1	1
GM18501	HNRNPA2B1	NM_002137.3	4	3	25	0.230769230769231	0.166666666666667	0.0641025641025641	1	1
GM18501	HNRNPA2B1	NM_002137.3	8	7	51	0.923076923076923	0.88	0.0430769230769231	0.667952287297898	1
GM18501	HNRNPA2B1	NM_002137.3	9	8	58	0.0645161290322581	0.185185185185185	-0.120669056152927	0.233185880653607	1
GM18501	HNRNPAB	NM_031266.2	5	6	41	0.625	0.84	-0.215	0.149607221985082	1
GM18501	HNRNPAB	NM_031266.2	6	7	38	0.55	0.666666666666667	-0.116666666666667	0.521630640651775	1
GM18501	HNRNPD	NM_001003810.1	3	2	59	0.142857142857143	0.161290322580645	-0.0184331797235023	1	1
GM18501	HNRNPD	NM_002138.3	3	2	55	0	0.0714285714285714	-0.0714285714285714	0.490909090909091	1
GM18501	HNRNPDL	NM_001207000.1	2	1	65	0.0256410256410256	0.0769230769230769	-0.0512820512820513	0.558928571428571	1
GM18501	HNRNPDL	NM_001207000.1	3	2	28	0.647058823529412	0.818181818181818	-0.171122994652406	0.418803418803419	1
GM18501	HNRNPDL	NM_001207000.1	4	3	28	0.266666666666667	0.153846153846154	0.112820512820513	0.654589371980676	1
GM18501	HNRNPDL	NM_031372.3	5	4	57	0.971428571428571	0.954545454545455	0.0168831168831168	1	1
GM18501	HNRNPH1	NM_001257293.1	2	1	105	0.979166666666667	1	-0.0208333333333334	0.457142857142857	1
GM18501	HNRNPH1	NM_001257293.1	3	2	192	0.62037037037037	0.595238095238095	0.0251322751322751	0.766583931449994	1
GM18501	HNRNPH1	NM_001257293.1	4	3	122	0.803030303030303	0.75	0.053030303030303	0.517576790247456	1
GM18501	HNRNPH1	NM_001257293.1	5	4	145	0.319444444444444	0.219178082191781	0.100266362252664	0.193632114027924	1
GM18501	HNRNPH1	NM_001257293.1	6	5	903	0	0.00440528634361234	-0.00440528634361234	0.499461023000444	1
GM18501	HNRNPH1	NM_001257293.1	7	6	167	0.975903614457831	1	-0.0240963855421686	0.245508982035928	1
GM18501	HNRNPH1	NM_001257293.1	8	7	186	0.010752688172043	0	0.010752688172043	1	1
GM18501	HNRNPH1	NM_001257293.1	9	8	72	0.764705882352941	0.868421052631579	-0.103715170278638	0.359275841001477	1
GM18501	HNRNPH1	NM_001257293.1	11	10	133	0.144927536231884	0.21875	-0.0738224637681159	0.367131894929149	1
GM18501	HNRNPH1	NM_001257293.1	12	11	590	0.00342465753424658	0.00335570469798658	6.8952836259998e-05	1	1
GM18501	HNRNPH1	NM_001257293.1	13	12	73	0.657142857142857	0.68421052631579	-0.0270676691729324	1	1
GM18501	HNRNPH1	NM_005520.2	2	1	83	0.973684210526316	1	-0.0263157894736842	0.457831325301205	1
GM18501	HNRNPH3	NM_001322434.1	1	2	64	0.941176470588235	1	-0.0588235294117647	0.494047619047619	1
GM18501	HNRNPH3	NM_001322434.1	2	3	35	0.05	0	0.05	1	1
GM18501	HNRNPH3	NM_001322434.1	3	4	22	0.545454545454545	0.181818181818182	0.363636363636364	0.18266253869969	1
GM18501	HNRNPH3	NM_001322434.1	6	7	51	0.777777777777778	0.916666666666667	-0.138888888888889	0.255283389951725	1
GM18501	HNRNPH3	NM_001322434.1	7	8	38	0.521739130434783	0.466666666666667	0.0550724637681159	1	1
GM18501	HNRNPH3	NM_001322434.1	8	9	42	0.0434782608695652	0.210526315789474	-0.167048054919908	0.158022871437506	1
GM18501	HNRNPH3	NM_001322436.1	1	2	30	0.857142857142857	1	-0.142857142857143	0.209195402298851	1
GM18501	HNRNPH3	NM_001322442.1	3	4	22	0.545454545454545	0.181818181818182	0.363636363636364	0.18266253869969	1
GM18501	HNRNPH3	NM_001322443.1	1	2	65	0.942857142857143	1	-0.0571428571428572	0.495192307692308	1
GM18501	HNRNPH3	NM_001322445.1	2	3	23	0.5	0.307692307692308	0.192307692307692	0.417283618252793	1
GM18501	HNRNPH3	NM_001322446.1	1	2	36	0.894736842105263	0.941176470588235	-0.0464396284829721	1	1
GM18501	HNRNPH3	NM_001322448.1	1	2	36	0.894736842105263	0.941176470588235	-0.0464396284829721	1	1
GM18501	HNRNPH3	NM_001322450.1	2	3	23	0.5	0.307692307692308	0.192307692307692	0.417283618252793	1
GM18501	HNRNPK	NM_001318186.1	12	11	21	0.909090909090909	0.9	0.00909090909090904	1	1
GM18501	HNRNPK	NM_001318188.1	7	6	47	0.0555555555555556	0	0.0555555555555556	0.382978723404255	1
GM18501	HNRNPM	NM_001297418.1	11	12	27	0.4	0.235294117647059	0.164705882352941	0.414668423364076	1
GM18501	HNRNPM	NM_001297418.1	12	13	24	0	0.214285714285714	-0.214285714285714	0.239130434782609	1
GM18501	HNRNPM	NM_031203.3	5	6	426	0.995169082125604	1	-0.00483091787439616	0.485915492957746	1
GM18501	HPS1	NM_000195.4	12	11	41	0.0714285714285714	0.111111111111111	-0.0396825396825397	1	1
GM18501	HPS1	NM_000195.4	15	14	52	0.476190476190476	0.290322580645161	0.185867895545315	0.242172284423766	1
GM18501	HPS1	NM_000195.4	16	15	51	0.3	0.032258064516129	0.267741935483871	0.011047971455002	0.358625950414955
GM18501	HPS1	NM_000195.4	17	16	51	0	0.0526315789473684	-0.0526315789473684	0.372549019607843	1
GM18501	HRAS	NM_001130442.2	3	2	49	0.0416666666666667	0.04	0.00166666666666666	1	1
GM18501	HSF1	NM_005526.2	1	2	30	1	0.9375	0.0625	1	1
GM18501	HSF1	NM_005526.2	5	6	63	0.0625	0.032258064516129	0.030241935483871	1	1
GM18501	HSF1	NM_005526.2	8	9	45	1	0.944444444444444	0.0555555555555556	0.4	1
GM18501	HSF1	NM_005526.2	11	12	49	0.375	0.36	0.015	1	1
GM18501	HSP90AB1	NM_001271969.1	3	4	26	0.9	0.875	0.025	1	1
GM18501	HSP90AB1	NM_001271969.1	6	7	26	0.181818181818182	0	0.181818181818182	0.169230769230769	1
GM18501	HSP90AB1	NM_001271969.1	8	9	27	0.5	0.538461538461538	-0.0384615384615384	1	1
GM18501	HSP90AB1	NM_001271969.1	9	10	81	1	0.977777777777778	0.0222222222222223	1	1
GM18501	HSP90AB1	NM_001271969.1	10	11	75	0	0.0238095238095238	-0.0238095238095238	1	1
GM18501	HSP90B1	NM_003299.2	1	2	85	0.975609756097561	0.977272727272727	-0.00166297117516634	1	1
GM18501	HSP90B1	NM_003299.2	2	3	93	0.0408163265306122	0.0454545454545455	-0.00463821892393321	1	1
GM18501	HSP90B1	NM_003299.2	3	4	22	0	0.0833333333333333	-0.0833333333333333	1	1
GM18501	HSP90B1	NM_003299.2	5	6	28	0	0.117647058823529	-0.117647058823529	0.505291005291005	1
GM18501	HSP90B1	NM_003299.2	14	15	107	0.138888888888889	0.0422535211267606	0.0966353677621283	0.115506524862561	1
GM18501	HSP90B1	NM_003299.2	15	16	40	0.454545454545454	0.5	-0.0454545454545455	1	1
GM18501	HSP90B1	NM_003299.2	16	17	112	0.948717948717949	0.588235294117647	0.360482654600302	7.52246592074341e-06	0.000835026423576087
GM18501	HSPA5	NM_005347.4	4	3	30	0.941176470588235	0.923076923076923	0.0180995475113122	1	1
GM18501	HSPA5	NM_005347.4	6	5	32	0.1875	0	0.1875	0.225806451612903	1
GM18501	HSPA5	NM_005347.4	7	6	22	0.0833333333333333	0.3	-0.216666666666667	0.293233082706767	1
GM18501	HSPH1	NM_001286503.1	5	4	39	0.944444444444444	0.952380952380952	-0.00793650793650791	1	1
GM18501	HSPH1	NM_001286504.1	13	12	24	0.0714285714285714	0	0.0714285714285714	1	1
GM18501	HTT	NM_002111.7	57	58	62	0.933333333333333	0.9375	-0.00416666666666665	1	1
GM18501	HTT	NM_002111.7	60	61	48	0	0.0434782608695652	-0.0434782608695652	0.479166666666667	1
GM18501	HYOU1	NM_001130991.2	16	15	27	0.823529411764706	0.9	-0.0764705882352942	1	1
GM18501	HYOU1	NM_001130991.2	20	19	37	0.9	0.962962962962963	-0.0629629629629629	0.472972972972973	1
GM18501	HYOU1	NM_001130991.2	21	20	52	0.0666666666666667	0	0.0666666666666667	0.288461538461538	1
GM18501	HYOU1	NM_001130991.2	22	21	27	0.933333333333333	1	-0.0666666666666667	1	1
GM18501	HYOU1	NM_001130991.2	23	22	38	0	0.0555555555555556	-0.0555555555555556	0.473684210526316	1
GM18501	HYOU1	NM_006389.4	2	1	25	0	0.0909090909090909	-0.0909090909090909	0.44	1
GM18501	ICAM1	NM_000201.2	4	5	21	0.818181818181818	0.9	-0.0818181818181818	1	1
GM18501	ICAM1	NM_000201.2	5	6	42	0.769230769230769	0.75	0.0192307692307693	1	1
GM18501	ICE2	NM_001018089.2	15	14	56	0	0.0384615384615385	-0.0384615384615385	0.464285714285714	1
GM18501	IDH1	NM_001282386.1	6	5	29	0.0714285714285714	0.0666666666666667	0.00476190476190476	1	1
GM18501	IDH2	NM_001289910.1	5	4	45	1	0.956521739130435	0.0434782608695652	1	1
GM18501	IDH2	NM_001289910.1	6	5	40	0.105263157894737	0.0476190476190476	0.0576441102756892	0.596153846153846	1
GM18501	IDH2	NM_001289910.1	7	6	51	0.0869565217391304	0.142857142857143	-0.0559006211180124	0.677847309136421	1
GM18501	IDH2	NM_001289910.1	8	7	34	0	0.142857142857143	-0.142857142857143	0.270053475935829	1
GM18501	IDH3A	NM_005530.2	1	2	21	0.9	0.909090909090909	-0.00909090909090904	1	1
GM18501	IDH3B	NM_001258384.2	8	7	33	0.0476190476190476	0	0.0476190476190476	1	1
GM18501	IDI1	NM_001317955.1	4	3	174	0.0319148936170213	0.0125	0.0194148936170213	0.625579842082411	1
GM18501	IDI1	NM_001317955.1	5	4	21	0.5	0.272727272727273	0.227272727272727	0.386996904024768	1
GM18501	IFFO1	NM_001039670.2	7	6	195	0.989795918367347	1	-0.0102040816326531	1	1
GM18501	IFFO1	NM_080730.4	7	6	196	0.98989898989899	1	-0.0101010101010101	1	1
GM18501	IFI16	NM_001206567.1	8	9	69	0.4	0.230769230769231	0.169230769230769	0.187245018908555	1
GM18501	IFI16	NM_001206567.1	9	10	60	0.0303030303030303	0.0740740740740741	-0.0437710437710438	0.583401519579193	1
GM18501	IFI30	NM_006332.4	1	2	119	0.0163934426229508	0.120689655172414	-0.104296212549463	0.029586112386576	0.642038307534785
GM18501	IFI30	NM_006332.4	4	5	93	0.972222222222222	0.982456140350877	-0.0102339181286549	1	1
GM18501	IFI30	NM_006332.4	5	6	95	0.121951219512195	0.037037037037037	0.0849141824751581	0.232911314803275	1
GM18501	IFI44	NM_006417.4	4	5	34	0.789473684210526	0.933333333333333	-0.143859649122807	0.354730895290668	1
GM18501	IFI44	NM_006417.4	5	6	257	0.507352941176471	0.355371900826446	0.151981040350024	0.0167177015410687	0.460486303019935
GM18501	IFI44	NM_006417.4	7	8	675	0	0.0026246719160105	-0.0026246719160105	1	1
GM18501	IFI44L	NM_006820.3	1	2	51	0.722222222222222	0.933333333333333	-0.211111111111111	0.141282343603045	1
GM18501	IFI44L	NM_006820.3	2	3	588	0.0638297872340425	0.0025	0.0613297872340426	8.3329533048793e-06	0.000909182183020826
GM18501	IFI44L	NM_006820.3	4	5	220	0.990654205607477	0.946902654867257	0.04375155074022	0.119987889013185	1
GM18501	IFI44L	NM_006820.3	5	6	282	0.0238095238095238	0.0128205128205128	0.010989010989011	0.659203507187435	1
GM18501	IFI44L	NM_006820.3	6	7	40	0.133333333333333	0.12	0.0133333333333333	1	1
GM18501	IFI44L	NM_006820.3	7	8	75	0.114285714285714	0.3	-0.185714285714286	0.0881740412818722	1
GM18501	IFI6	NM_002038.3	3	2	71	0	0.0227272727272727	-0.0227272727272727	1	1
GM18501	IFI6	NM_022872.2	3	2	71	0	0.0227272727272727	-0.0227272727272727	1	1
GM18501	IFI6	NM_022873.2	3	2	71	0	0.0227272727272727	-0.0227272727272727	1	1
GM18501	IFIH1	NM_022168.3	12	11	65	0.0476190476190476	0	0.0476190476190476	0.323076923076923	1
GM18501	IFIH1	NM_022168.3	13	12	23	0.6	0.461538461538462	0.138461538461538	0.680172297752053	1
GM18501	IFIH1	NM_022168.3	14	13	50	0.615384615384615	0.708333333333333	-0.092948717948718	0.559202854664962	1
GM18501	IFIH1	NM_022168.3	15	14	96	0.037037037037037	0	0.037037037037037	0.502631578947368	1
GM18501	IFRD1	NM_001007245.2	9	10	39	0.142857142857143	0.0555555555555556	0.0873015873015873	0.609366451471715	1
GM18501	IFRD1	NM_001007245.2	10	11	49	0	0.0357142857142857	-0.0357142857142857	1	1
GM18501	IGF2BP3	NM_006547.2	11	10	59	0.971428571428571	1	-0.0285714285714286	1	1
GM18501	IGF2BP3	NM_006547.2	14	13	26	0.357142857142857	0.5	-0.142857142857143	0.692165836586351	1
GM18501	IL17RB	NM_018725.3	9	10	37	0	0.0526315789473684	-0.0526315789473684	1	1
GM18501	IL21R	NM_021798.3	4	5	24	0	0.166666666666667	-0.166666666666667	0.478260869565217	1
GM18501	ILF2	NM_001267809.1	7	6	68	0.976190476190476	1	-0.0238095238095238	1	1
GM18501	ILF2	NM_001267809.1	8	7	74	0.355555555555556	0.517241379310345	-0.161685823754789	0.228371231844748	1
GM18501	ILF2	NM_001267809.1	9	8	67	0.105263157894737	0.206896551724138	-0.101633393829401	0.309293765425039	1
GM18501	ILF2	NM_001267809.1	10	9	52	0.8	0.925925925925926	-0.125925925925926	0.240680314679063	1
GM18501	ILF2	NM_001267809.1	11	10	98	0.941176470588235	0.966666666666667	-0.0254901960784314	1	1
GM18501	ILF2	NM_001267809.1	12	11	80	0.404761904761905	0.131578947368421	0.273182957393484	0.0112012573945436	0.361551919856489
GM18501	ILF2	NM_001267809.1	13	12	72	0.0425531914893617	0.04	0.0025531914893617	1	1
GM18501	ILK	NM_001014794.2	1	2	20	0.2	0.2	0	1	1
GM18501	ILK	NM_001014794.2	3	4	27	0.142857142857143	0.153846153846154	-0.010989010989011	1	1
GM18501	ILKAP	NM_030768.2	10	9	45	0	0.04	-0.04	1	1
GM18501	ILVBL	NM_006844.4	2	1	80	0.0444444444444444	0.228571428571429	-0.184126984126984	0.0181304022038857	0.482174269445213
GM18501	ILVBL	NM_006844.4	12	11	37	0.904761904761905	0.6875	0.217261904761905	0.202165767630663	1
GM18501	ILVBL	NM_006844.4	14	13	31	0.25	0.454545454545454	-0.204545454545455	0.42321643148649	1
GM18501	INPP5D	NM_001017915.2	6	7	29	0.153846153846154	0.125	0.0288461538461539	1	1
GM18501	INPP5D	NM_001017915.2	13	14	86	0.957446808510638	0.948717948717949	0.00872885979268967	1	1
GM18501	INPP5D	NM_001017915.2	25	26	33	0.285714285714286	0.263157894736842	0.0225563909774436	1	1
GM18501	INPP5E	NM_001318502.1	4	3	33	0.0769230769230769	0.05	0.0269230769230769	1	1
GM18501	INPP5E	NM_001318502.1	6	5	29	0.75	0.846153846153846	-0.0961538461538462	0.662835249042146	1
GM18501	INPP5E	NM_019892.5	6	5	29	0.75	0.846153846153846	-0.0961538461538462	0.662835249042146	1
GM18501	INPPL1	NM_001567.3	3	4	78	0.243243243243243	0.170731707317073	0.0725115359261701	0.575787891784643	1
GM18501	INPPL1	NM_001567.3	4	5	35	0.375	0.210526315789474	0.164473684210526	0.454343209626858	1
GM18501	INPPL1	NM_001567.3	5	6	60	0	0.0689655172413793	-0.0689655172413793	0.229378531073446	1
GM18501	INPPL1	NM_001567.3	6	7	40	0.954545454545455	1	-0.0454545454545454	1	1
GM18501	INPPL1	NM_001567.3	7	8	77	0.048780487804878	0	0.048780487804878	0.495557074504443	1
GM18501	INPPL1	NM_001567.3	10	11	54	0.892857142857143	0.923076923076923	-0.0302197802197802	1	1
GM18501	INPPL1	NM_001567.3	11	12	36	0.277777777777778	0.166666666666667	0.111111111111111	0.690565274547477	1
GM18501	INPPL1	NM_001567.3	18	19	133	0.0138888888888889	0.0163934426229508	-0.00250455373406193	1	1
GM18501	INPPL1	NM_001567.3	26	27	52	0.0666666666666667	0.0909090909090909	-0.0242424242424242	1	1
GM18501	INTS1	NM_001080453.2	27	26	30	0	0.0666666666666667	-0.0666666666666667	1	1
GM18501	INTS1	NM_001080453.2	28	27	24	0.0714285714285714	0	0.0714285714285714	1	1
GM18501	INTS1	NM_001080453.2	44	43	27	0	0.0909090909090909	-0.0909090909090909	0.407407407407407	1
GM18501	INTS10	NM_018142.2	14	15	21	0.909090909090909	1	-0.0909090909090909	1	1
GM18501	INTS10	NM_018142.2	15	16	24	0.166666666666667	0.166666666666667	0	1	1
GM18501	INTS11	NM_001256456.1	9	8	43	0.909090909090909	0.904761904761905	0.00432900432900429	1	1
GM18501	INTS11	NM_001256456.1	14	13	35	0.944444444444444	1	-0.0555555555555556	1	1
GM18501	INTS11	NM_001256456.1	17	16	23	0.166666666666667	0.181818181818182	-0.0151515151515152	1	1
GM18501	INTS8	NM_017864.3	18	19	24	0.0833333333333333	0.0833333333333333	0	1	1
GM18501	IPO4	NM_024658.3	6	5	24	0.785714285714286	0.7	0.0857142857142857	0.66533180778032	1
GM18501	IPO4	NM_024658.3	20	19	51	0.024390243902439	0.8	-0.775609756097561	6.09733579788413e-07	8.1932147503042e-05
GM18501	IQCB1	NM_001023570.3	11	10	29	0	0.125	-0.125	0.487684729064039	1
GM18501	IQGAP1	NM_003870.3	31	32	23	0	0.0833333333333333	-0.0833333333333333	1	1
GM18501	IRF3	NM_001197122.1	3	2	27	0.25	0.2	0.05	1	1
GM18501	IRF3	NM_001197122.1	4	3	30	0.0555555555555556	0	0.0555555555555556	1	1
GM18501	IRF3	NM_001197122.1	5	4	26	0.933333333333333	1	-0.0666666666666667	1	1
GM18501	IRF4	NM_001195286.1	1	2	24	0.636363636363636	0.692307692307692	-0.0559440559440559	1	1
GM18501	IRF4	NM_001195286.1	2	3	41	0.157894736842105	0.318181818181818	-0.160287081339713	0.29187160894478	1
GM18501	IRF4	NM_001195286.1	3	4	44	0.91304347826087	0.619047619047619	0.29399585921325	0.0309928148839096	0.658300796007568
GM18501	IRF4	NM_001195286.1	4	5	45	0.0434782608695652	0.136363636363636	-0.0928853754940711	0.34625322997416	1
GM18501	IRF4	NM_001195286.1	6	7	65	0.457142857142857	0.0333333333333333	0.423809523809524	0.000119835248174787	0.00959095210392002
GM18501	IRF4	NM_001195286.1	7	8	76	0.229166666666667	0.321428571428571	-0.0922619047619048	0.425070208585203	1
GM18501	IRF4	NM_002460.3	3	4	44	0.91304347826087	0.619047619047619	0.29399585921325	0.0309928148839096	0.658300796007568
GM18501	IRF4	NM_002460.3	4	5	44	0.0454545454545455	0.136363636363636	-0.0909090909090909	0.606920022688599	1
GM18501	IRF8	NM_002163.2	3	4	30	0.823529411764706	0.692307692307692	0.131221719457014	0.665644955300128	1
GM18501	IRF8	NM_002163.2	4	5	30	0	0.166666666666667	-0.166666666666667	0.151724137931034	1
GM18501	IRF8	NM_002163.2	5	6	23	0.166666666666667	0.363636363636364	-0.196969696969697	0.37070938215103	1
GM18501	IRF8	NM_002163.2	6	7	61	0.228571428571429	0.153846153846154	0.0747252747252747	0.531566344007757	1
GM18501	IRF8	NM_002163.2	7	8	34	0.166666666666667	0.1875	-0.0208333333333333	1	1
GM18501	ISCU	NM_001301140.1	1	2	347	0	0.00540540540540541	-0.00540540540540541	1	1
GM18501	ISCU	NM_001301140.1	2	3	44	0.333333333333333	0.346153846153846	-0.0128205128205128	1	1
GM18501	ISCU	NM_014301.4	4	5	140	0.929577464788732	0.884057971014493	0.0455194937742396	0.395884409311272	1
GM18501	IST1	NM_001270975.1	6	7	45	0.571428571428571	0.708333333333333	-0.136904761904762	0.368842441328856	1
GM18501	ITGA4	NM_000885.5	26	27	41	0.952380952380952	1	-0.0476190476190477	1	1
GM18501	ITGB2	NM_000211.4	10	9	31	0.941176470588235	0.714285714285714	0.226890756302521	0.148354138343015	1
GM18501	ITGB2	NM_000211.4	11	10	92	0	0.0526315789473684	-0.0526315789473684	0.167940754897277	1
GM18501	ITGB2	NM_000211.4	12	11	43	0.157894736842105	0.0833333333333333	0.0745614035087719	0.64044803749852	1
GM18501	ITGB2	NM_000211.4	15	14	27	0.142857142857143	0.230769230769231	-0.0879120879120879	0.648309178743961	1
GM18501	ITPA	NM_001267623.1	4	5	25	0.0833333333333333	0	0.0833333333333333	0.48	1
GM18501	ITPRID2	NM_001130445.2	10	11	37	0.941176470588235	1	-0.0588235294117647	0.45945945945946	1
GM18501	ITPRID2	NM_001130445.2	11	12	43	0.0416666666666667	0	0.0416666666666667	1	1
GM18501	IVNS1ABP	NM_006469.4	8	7	23	0.153846153846154	0	0.153846153846154	0.486166007905138	1
GM18501	IVNS1ABP	NM_006469.4	13	12	34	0.0476190476190476	0	0.0476190476190476	1	1
GM18501	JMJD4	NM_001161465.1	4	3	45	1	0.789473684210526	0.210526315789474	0.0260142957817377	0.595197575474997
GM18501	KATNB1	NM_005886.2	10	11	29	0	0.0909090909090909	-0.0909090909090909	0.379310344827586	1
GM18501	KATNB1	NM_005886.2	17	18	34	0.0434782608695652	0	0.0434782608695652	1	1
GM18501	KCNAB2	NM_001199860.1	14	15	39	0.947368421052632	1	-0.0526315789473685	0.487179487179487	1
GM18501	KCNN4	NM_002250.2	7	6	72	0.037037037037037	0.0555555555555556	-0.0185185185185185	1	1
GM18501	KCNN4	NM_002250.2	8	7	43	0.967741935483871	0.833333333333333	0.134408602150538	0.183615590308727	1
GM18501	KIAA0556	NM_015202.3	24	25	24	0	0.0833333333333333	-0.0833333333333333	1	1
GM18501	KIF18B	NM_001264573.1	3	2	22	0.363636363636364	0.545454545454545	-0.181818181818182	0.66992140985949	1
GM18501	KIF18B	NM_001264573.1	12	11	32	0.9375	1	-0.0625	1	1
GM18501	KIF18B	NM_001264573.1	13	12	38	0.416666666666667	0.357142857142857	0.0595238095238095	1	1
GM18501	KIF18B	NM_001264573.1	14	13	46	0.0476190476190476	0.04	0.00761904761904762	1	1
GM18501	KIF22	NM_001256269.1	9	10	32	0	0.0625	-0.0625	1	1
GM18501	KIF22	NM_001256269.1	12	13	184	0.0714285714285714	0.08	-0.00857142857142858	1	1
GM18501	KLF6	NM_001300.5	2	1	31	0.857142857142857	0.823529411764706	0.0336134453781513	1	1
GM18501	KLF6	NM_001300.5	3	2	28	0.0833333333333333	0.0625	0.0208333333333333	1	1
GM18501	KLHL12	NM_001303051.1	5	4	46	0.72	0.428571428571429	0.291428571428571	0.0716050349556287	0.953153361549612
GM18501	KLHL17	NM_198317.2	1	2	24	0.0909090909090909	0.230769230769231	-0.13986013986014	0.596273291925466	1
GM18501	KLHL17	NM_198317.2	2	3	61	0.230769230769231	0.171428571428571	0.0593406593406594	0.746082691144392	1
GM18501	KLHL17	NM_198317.2	3	4	61	0.793103448275862	0.90625	-0.113146551724138	0.287008109617281	1
GM18501	KLHL17	NM_198317.2	4	5	76	0.0333333333333333	0.0434782608695652	-0.0101449275362319	1	1
GM18501	KLHL17	NM_198317.2	5	6	26	0.545454545454545	0.6	-0.0545454545454546	1	1
GM18501	KLHL17	NM_198317.2	6	7	22	1	0.8	0.2	0.194805194805195	1
GM18501	KLHL17	NM_198317.2	7	8	51	1	0.821428571428571	0.178571428571429	0.0561624649859944	0.86588113403747
GM18501	KLHL17	NM_198317.2	8	9	124	0.0161290322580645	0.0161290322580645	0	1	1
GM18501	KLHL17	NM_198317.2	9	10	30	0.615384615384615	0.529411764705882	0.0859728506787331	0.721335923516938	1
GM18501	KPNA2	NM_001320611.1	5	6	62	0.025	0.0454545454545455	-0.0204545454545455	1	1
GM18501	KPNA2	NM_001320611.1	6	7	40	0.166666666666667	0.25	-0.0833333333333333	0.690496879351369	1
GM18501	KPNA2	NM_001320611.1	7	8	56	0.96551724137931	0.851851851851852	0.113665389527459	0.185463121783877	1
GM18501	KPNA2	NM_001320611.1	8	9	54	0.0645161290322581	0	0.0645161290322581	0.501747030048917	1
GM18501	KPNA2	NM_001320611.1	9	10	67	0.944444444444444	0.903225806451613	0.0412186379928315	0.656220645026615	1
GM18501	KREMEN2	NM_001253726.1	6	7	28	0.88235294117647	1	-0.117647058823529	0.505291005291005	1
GM18501	KTN1	NM_001079521.1	35	36	47	1	0.95	0.05	0.425531914893617	1
GM18501	KTN1	NM_001079521.1	36	37	40	0.04	0.133333333333333	-0.0933333333333333	0.544534412955466	1
GM18501	KTN1	NM_001079521.1	38	39	22	0.75	0.9	-0.15	0.593984962406015	1
GM18501	KTN1	NM_004986.3	32	33	61	0	0.08	-0.08	0.163934426229508	1
GM18501	L3MBTL2	NM_031488.4	14	15	53	0.0666666666666667	0	0.0666666666666667	0.499274310595065	1
GM18501	LAP3	NM_015907.2	7	8	55	0.333333333333333	0.419354838709677	-0.0860215053763441	0.583500374667214	1
GM18501	LAP3	NM_015907.2	8	9	38	0.526315789473684	0.631578947368421	-0.105263157894737	0.743136452697801	1
GM18501	LAPTM5	NM_006762.2	2	1	123	0.971428571428571	0.981132075471698	-0.0097035040431267	1	1
GM18501	LAPTM5	NM_006762.2	3	2	128	0.0588235294117647	0.0666666666666667	-0.00784313725490196	1	1
GM18501	LAPTM5	NM_006762.2	4	3	34	0.434782608695652	0.363636363636364	0.0711462450592885	1	1
GM18501	LAPTM5	NM_006762.2	5	4	98	0.0566037735849057	0	0.0566037735849057	0.247317483694509	1
GM18501	LAPTM5	NM_006762.2	7	6	28	0.823529411764706	0.727272727272727	0.0962566844919786	0.65254552211074	1
GM18501	LAT2	NM_014146.3	7	8	30	0.866666666666667	1	-0.133333333333333	0.482758620689655	1
GM18501	LCK	NM_001042771.2	2	3	165	0.978021978021978	1	-0.021978021978022	0.502291204730229	1
GM18501	LCK	NM_001042771.2	3	4	92	0.104166666666667	0.136363636363636	-0.0321969696969697	0.752066877153407	1
GM18501	LCK	NM_001042771.2	4	5	118	0.03125	0.0740740740740741	-0.0428240740740741	0.410448687393914	1
GM18501	LCK	NM_001042771.2	5	6	70	0.976744186046512	0.777777777777778	0.198966408268734	0.0113586479367867	0.363936280126971
GM18501	LCK	NM_001042771.2	6	7	101	0.0952380952380952	0.0526315789473684	0.0426065162907268	0.706597294517783	1
GM18501	LCK	NM_001042771.2	8	9	56	0.4	0.5	-0.1	0.590961007618669	1
GM18501	LCK	NM_001042771.2	9	10	191	0.150943396226415	0.176470588235294	-0.025527192008879	0.694939732139177	1
GM18501	LCK	NM_001042771.2	10	11	95	0.0740740740740741	0.121951219512195	-0.047877145438121	0.493115872578568	1
GM18501	LCP1	NM_002298.4	7	6	38	0.1	0	0.1	0.487908961593172	1
GM18501	LDHB	NM_001174097.2	7	6	32	0.235294117647059	0.333333333333333	-0.0980392156862745	0.698859844271413	1
GM18501	LGALS8	NM_006499.4	7	8	69	1	0.9375	0.0625	0.211423699914748	1
GM18501	LGALS8	NM_201543.2	7	8	68	0.973684210526316	1	-0.0263157894736842	1	1
GM18501	LILRB1	NM_001081637.2	4	5	50	1	0.967741935483871	0.032258064516129	1	1
GM18501	LILRB1	NM_001081637.2	7	8	37	0.0714285714285714	0.0869565217391304	-0.015527950310559	1	1
GM18501	LILRB1	NM_001081637.2	9	10	78	0.0294117647058824	0.0227272727272727	0.00668449197860962	1	1
GM18501	LILRB1	NM_001081637.2	11	12	28	0.666666666666667	0.5625	0.104166666666667	0.70465293668955	1
GM18501	LILRB1	NM_001081637.2	12	13	97	1	0.982456140350877	0.0175438596491229	1	1
GM18501	LILRB1	NM_001081637.2	13	14	74	0.142857142857143	0.217391304347826	-0.0745341614906832	0.546975087377607	1
GM18501	LILRB1	NM_001081638.3	12	13	97	1	0.982456140350877	0.0175438596491229	1	1
GM18501	LILRB1	NM_001081638.3	13	14	74	0.142857142857143	0.217391304347826	-0.0745341614906832	0.546975087377607	1
GM18501	LILRB1	NM_001081639.3	7	8	37	0.0714285714285714	0.0869565217391304	-0.015527950310559	1	1
GM18501	LILRB1	NM_006669.6	1	2	23	0.5	0.384615384615385	0.115384615384615	0.685018172028537	1
GM18501	LMF2	NM_033200.2	3	2	35	1	0.947368421052632	0.0526315789473685	1	1
GM18501	LMF2	NM_033200.2	5	4	44	0.0434782608695652	0.142857142857143	-0.0993788819875776	0.334656834940443	1
GM18501	LMF2	NM_033200.2	6	5	32	1	0.944444444444444	0.0555555555555556	1	1
GM18501	LMF2	NM_033200.2	7	6	100	0.861111111111111	0.96875	-0.107638888888889	0.0945952010377496	1
GM18501	LMF2	NM_033200.2	8	7	50	0.666666666666667	0.689655172413793	-0.0229885057471265	1	1
GM18501	LMF2	NM_033200.2	10	9	49	0.705882352941177	0.75	-0.0441176470588235	0.745784609228136	1
GM18501	LMF2	NM_033200.2	11	10	324	0.979865771812081	0.977142857142857	0.00272291466922348	1	1
GM18501	LMNA	NM_001257374.2	7	8	34	0.736842105263158	0.933333333333333	-0.196491228070175	0.196009529304694	1
GM18501	LMNA	NM_001257374.2	8	9	36	0.15	0.0625	0.0875	0.612936083524319	1
GM18501	LONP1	NM_001276479.1	13	12	21	0.0909090909090909	0.2	-0.109090909090909	0.586466165413534	1
GM18501	LPCAT1	NM_024830.3	8	7	44	0.863636363636364	0.681818181818182	0.181818181818182	0.280579196064165	1
GM18501	LPCAT1	NM_024830.3	9	8	129	0.0588235294117647	0.0491803278688525	0.00964320154291225	1	1
GM18501	LPCAT1	NM_024830.3	12	11	50	0.0555555555555556	0.0714285714285714	-0.0158730158730159	1	1
GM18501	LPCAT1	NM_024830.3	13	12	111	0	0.032258064516129	-0.032258064516129	0.502375102375103	1
GM18501	LPCAT4	NM_153613.2	8	7	40	0.105263157894737	0.142857142857143	-0.037593984962406	1	1
GM18501	LPCAT4	NM_153613.2	10	9	28	0.2	0.333333333333333	-0.133333333333333	0.669200364852539	1
GM18501	LPXN	NM_001143995.2	5	4	29	0.875	0.769230769230769	0.105769230769231	0.632183908045977	1
GM18501	LPXN	NM_001143995.2	8	7	95	0.0238095238095238	0	0.0238095238095238	0.442105263157895	1
GM18501	LRCH1	NM_001164211.1	13	14	27	0.0769230769230769	0	0.0769230769230769	0.481481481481482	1
GM18501	LRCH4	NM_001289934.1	13	12	40	1	0.95	0.05	1	1
GM18501	LRMP	NM_001204126.1	14	15	151	0.954545454545455	0.847058823529412	0.107486631016043	0.0362205011737966	0.713198636295818
GM18501	LRMP	NM_001204126.1	15	16	76	0.230769230769231	0.34	-0.109230769230769	0.432300820227289	1
GM18501	LRMP	NM_001204126.1	16	17	69	0.0285714285714286	0.0882352941176471	-0.0596638655462185	0.356478477179321	1
GM18501	LRMP	NM_001204126.1	17	18	122	0	0.0410958904109589	-0.0410958904109589	0.273065980219482	1
GM18501	LRP5L	NM_001135772.1	3	2	27	0	0.272727272727273	-0.272727272727273	0.0564102564102564	0.86588113403747
GM18501	LRPAP1	NM_002337.3	2	1	37	0.0476190476190476	0.0625	-0.0148809523809524	1	1
GM18501	LRPAP1	NM_002337.3	6	5	25	0.5	0.545454545454545	-0.0454545454545454	1	1
GM18501	LRPAP1	NM_002337.3	7	6	33	0.0666666666666667	0	0.0666666666666667	0.454545454545454	1
GM18501	LRRC47	NM_020710.2	4	3	33	0	0.0555555555555556	-0.0555555555555556	1	1
GM18501	LRRK2	NM_198578.3	48	49	67	0.973684210526316	1	-0.0263157894736842	1	1
GM18501	LSG1	NM_018385.2	12	11	29	0.0769230769230769	0	0.0769230769230769	0.448275862068966	1
GM18501	LTA	NM_000595.3	1	2	79	0.571428571428571	0.72972972972973	-0.158301158301158	0.16378101502904	1
GM18501	LTA	NM_000595.3	2	3	106	0.806451612903226	0.818181818181818	-0.0117302052785925	1	1
GM18501	LTV1	NM_032860.3	5	6	38	0.1	0.0555555555555556	0.0444444444444445	1	1
GM18501	LYN	NM_001111097.2	4	5	24	0.615384615384615	0.909090909090909	-0.293706293706294	0.165985616214449	1
GM18501	LYPLA1	NM_001279357.1	5	4	29	0.764705882352941	0.916666666666667	-0.151960784313726	0.370131783924887	1
GM18501	LYPLA1	NM_001279357.1	6	5	53	0.032258064516129	0	0.032258064516129	1	1
GM18501	LZTR1	NM_006767.3	17	18	52	1	0.966666666666667	0.0333333333333333	1	1
GM18501	LZTR1	NM_006767.3	18	19	73	0.675675675675676	0.583333333333333	0.0923423423423423	0.472455072170898	1
GM18501	LZTR1	NM_006767.3	19	20	66	0.0909090909090909	0.0606060606060606	0.0303030303030303	1	1
GM18501	MAEA	NM_001017405.2	6	7	46	0.947368421052632	0.888888888888889	0.0584795321637427	0.632190458681864	1
GM18501	MAEA	NM_001017405.2	7	8	76	0.102564102564103	0.162162162162162	-0.0595980595980596	0.511327790912311	1
GM18501	MAEA	NM_001297431.1	4	5	46	0.947368421052632	0.888888888888889	0.0584795321637427	0.632190458681864	1
GM18501	MAEA	NM_001297431.1	5	6	76	0.102564102564103	0.162162162162162	-0.0595980595980596	0.511327790912311	1
GM18501	MAF1	NM_032272.4	3	4	38	0.956521739130435	1	-0.0434782608695652	1	1
GM18501	MAF1	NM_032272.4	4	5	39	0.434782608695652	0.5	-0.0652173913043478	0.751956628486105	1
GM18501	MALT1	NM_006785.3	10	11	48	1	0.964285714285714	0.0357142857142857	1	1
GM18501	MALT1	NM_006785.3	11	12	36	0	0.0454545454545455	-0.0454545454545455	1	1
GM18501	MALT1	NM_173844.2	6	7	42	0.05	0	0.05	0.476190476190476	1
GM18501	MAN1B1	NM_016219.4	11	12	61	0.941176470588235	0.851851851851852	0.0893246187363834	0.391608290350581	1
GM18501	MAN2A2	NM_001320977.1	14	15	37	0	0.0666666666666667	-0.0666666666666667	0.405405405405405	1
GM18501	MAN2A2	NM_006122.3	19	20	29	0.941176470588235	0.833333333333333	0.107843137254902	0.553366174055829	1
GM18501	MANF	NM_006010.5	2	3	37	0.117647058823529	0	0.117647058823529	0.204204204204204	1
GM18501	MAP2K1	NM_002755.3	5	6	20	0.1	0	0.1	1	1
GM18501	MAP2K1	NM_002755.3	7	8	28	0.714285714285714	0.857142857142857	-0.142857142857143	0.648309178743961	1
GM18501	MAP2K2	NM_030662.3	7	6	65	0.0344827586206897	0	0.0344827586206897	0.446153846153846	1
GM18501	MAP3K8	NM_005204.3	1	2	61	0	0.037037037037037	-0.037037037037037	0.442622950819672	1
GM18501	MAP4K1	NM_001042600.2	6	5	21	0.181818181818182	0	0.181818181818182	0.476190476190476	1
GM18501	MAP4K1	NM_001042600.2	23	22	35	0	0.0588235294117647	-0.0588235294117647	0.485714285714286	1
GM18501	MAP4K1	NM_001042600.2	26	25	34	0.153846153846154	0.0952380952380952	0.0586080586080586	0.627177850612386	1
GM18501	MAP4K1	NM_001042600.2	27	26	28	0.75	0.916666666666667	-0.166666666666667	0.355311355311355	1
GM18501	MAP4K1	NM_001042600.2	28	27	75	0.736842105263158	0.945945945945946	-0.209103840682788	0.0245480043785366	0.573933241564484
GM18501	MAPK11	NM_002751.6	9	8	29	0.8	0.785714285714286	0.0142857142857143	1	1
GM18501	MAPK12	NM_001303252.1	3	2	56	0.96	1	-0.04	0.446428571428571	1
GM18501	MAPK12	NM_001303252.1	7	6	39	0	0.136363636363636	-0.136363636363636	0.242914979757085	1
GM18501	MAPK12	NM_001303252.1	8	7	42	0.0555555555555556	0	0.0555555555555556	0.428571428571429	1
GM18501	MARCH7	NM_001282805.1	9	10	58	0.346153846153846	0.375	-0.0288461538461539	1	1
GM18501	MARCH7	NM_001282806.1	6	7	50	0.238095238095238	0.344827586206897	-0.106732348111658	0.536817507889544	1
GM18501	MAT2A	NM_005911.5	1	2	121	0.949152542372881	0.919354838709677	0.029797703663204	0.717821716891701	1
GM18501	MAT2A	NM_005911.5	2	3	41	0.8125	0.96	-0.1475	0.281129653401797	1
GM18501	MAT2A	NM_005911.5	3	4	113	0.388888888888889	0.152542372881356	0.236346516007533	0.00559795621697444	0.225784234084636
GM18501	MAT2A	NM_005911.5	4	5	71	0.625	0.709677419354839	-0.0846774193548387	0.613567734002828	1
GM18501	MAT2A	NM_005911.5	5	6	99	0.892307692307692	0.794117647058823	0.0981900452488689	0.227878279958685	1
GM18501	MAT2A	NM_005911.5	6	7	63	0.742857142857143	0.5	0.242857142857143	0.0660467078823539	0.923671444212924
GM18501	MAT2A	NM_005911.5	7	8	64	0.961538461538462	1	-0.0384615384615384	0.40625	1
GM18501	MAU2	NM_015329.3	11	12	26	1	0.923076923076923	0.0769230769230769	1	1
GM18501	MAU2	NM_015329.3	12	13	40	0.1	0.1	0	1	1
GM18501	MAU2	NM_015329.3	13	14	50	0.285714285714286	0.318181818181818	-0.0324675324675325	1	1
GM18501	MAU2	NM_015329.3	14	15	28	0.0714285714285714	0	0.0714285714285714	1	1
GM18501	MAU2	NM_015329.3	16	17	27	0.615384615384615	0.642857142857143	-0.0274725274725275	1	1
GM18501	MAU2	NM_015329.3	17	18	30	0.142857142857143	0.125	0.0178571428571428	1	1
GM18501	MAZ	NM_001042539.2	1	2	30	0.75	0.777777777777778	-0.0277777777777778	1	1
GM18501	MAZ	NM_001042539.2	2	3	55	0.25	0.0967741935483871	0.153225806451613	0.157200496624777	1
GM18501	MBD4	NM_001276270.1	6	5	39	0.148148148148148	0.333333333333333	-0.185185185185185	0.220567316542549	1
GM18501	MBTPS1	NM_003791.3	21	20	46	0.0555555555555556	0	0.0555555555555556	0.391304347826087	1
GM18501	MBTPS1	NM_003791.3	22	21	24	0.333333333333333	0.166666666666667	0.166666666666667	0.64040536122916	1
GM18501	MCM3	NM_001270472.1	9	8	44	0	0.0344827586206897	-0.0344827586206897	1	1
GM18501	MCM3AP	NM_003906.4	10	9	53	0.0333333333333333	0.0434782608695652	-0.0101449275362319	1	1
GM18501	MCM3AP	NM_003906.4	21	20	79	0.944444444444444	1	-0.0555555555555556	0.204479065238559	1
GM18501	MCM3AP	NM_003906.4	25	24	23	0.9	1	-0.1	0.434782608695652	1
GM18501	MCM4	NM_182746.2	1	2	30	0.846153846153846	1	-0.153846153846154	0.179310344827586	1
GM18501	MCM5	NM_006739.3	15	16	98	0.68421052631579	0.75609756097561	-0.0718870346598203	0.501310327606208	1
GM18501	MCM7	NM_001278595.1	4	3	363	0	0.00578034682080925	-0.00578034682080925	0.476584022038568	1
GM18501	MCM7	NM_001278595.1	6	5	25	0.909090909090909	1	-0.0909090909090909	0.44	1
GM18501	MCM7	NM_001278595.1	10	9	47	1	0.96875	0.03125	1	1
GM18501	MCM7	NM_001278595.1	11	10	66	0.129032258064516	0.0857142857142857	0.0433179723502304	0.697789687543786	1
GM18501	MCM7	NM_001278595.1	12	11	63	0.818181818181818	0.833333333333333	-0.0151515151515151	1	1
GM18501	MCM7	NM_001278595.1	13	12	535	0	0.00390625	-0.00390625	0.478504672897196	1
GM18501	MCM7	NM_005916.4	4	3	170	0.218390804597701	0.349397590361446	-0.131006785763745	0.0630883525301278	0.914374042380923
GM18501	MCOLN2	NM_153259.3	12	11	31	0.615384615384615	1	-0.384615384615385	0.00757455373695641	0.283141920143827
GM18501	MCRIP2	NM_138418.2	3	4	27	0.857142857142857	0.923076923076923	-0.065934065934066	1	1
GM18501	MED10	NM_032286.2	3	2	39	0.222222222222222	0.0952380952380952	0.126984126984127	0.386694386694387	1
GM18501	MED23	NM_001270521.1	24	23	56	1	0.958333333333333	0.0416666666666666	0.428571428571429	1
GM18501	MEF2B	NM_001145785.1	5	4	169	1	0.986301369863014	0.0136986301369864	0.431952662721894	1
GM18501	MEF2B	NM_001145785.1	6	5	48	0.0344827586206897	0.0526315789473684	-0.0181488203266788	1	1
GM18501	MEF2B	NM_001145785.1	7	6	54	0.264705882352941	0.35	-0.0852941176470588	0.548792565873119	1
GM18501	METTL17	NM_001029991.1	1	2	29	0.692307692307692	0.625	0.0673076923076923	1	1
GM18501	METTL17	NM_001029991.1	4	5	44	0.888888888888889	1	-0.111111111111111	0.161733615221987	1
GM18501	METTL17	NM_001029991.1	5	6	132	0.985915492957746	0.950819672131148	0.035095820826599	0.335086654277139	1
GM18501	METTL17	NM_001029991.1	6	7	299	0	0.00657894736842105	-0.00657894736842105	1	1
GM18501	METTL17	NM_001029991.1	7	8	40	0.75	0.916666666666667	-0.166666666666667	0.195331363752416	1
GM18501	METTL17	NM_001029991.1	10	11	245	0.991803278688525	1	-0.00819672131147542	0.497959183673469	1
GM18501	METTL3	NM_019852.4	3	2	35	0.791666666666667	0.727272727272727	0.0643939393939393	0.685467512922855	1
GM18501	METTL3	NM_019852.4	4	3	69	0.894736842105263	0.935483870967742	-0.0407470288624787	0.683678514675385	1
GM18501	METTL3	NM_019852.4	5	4	79	0.369565217391304	0.424242424242424	-0.0546772068511199	0.647456211224857	1
GM18501	METTL3	NM_019852.4	6	5	28	0.4375	0.333333333333333	0.104166666666667	0.70465293668955	1
GM18501	METTL3	NM_019852.4	7	6	66	0.307692307692308	0.407407407407407	-0.0997150997150997	0.440394634951694	1
GM18501	MFF	NM_001277061.1	8	9	69	0	0.027027027027027	-0.027027027027027	1	1
GM18501	MFN2	NM_001127660.1	7	8	25	0	0.0769230769230769	-0.0769230769230769	1	1
GM18501	MGAT4B	NM_014275.4	2	1	75	0.0851063829787234	0.107142857142857	-0.0220364741641337	1	1
GM18501	MGAT4B	NM_014275.4	3	2	34	0.714285714285714	0.769230769230769	-0.054945054945055	1	1
GM18501	MGAT4B	NM_014275.4	4	3	31	0.0625	0.133333333333333	-0.0708333333333333	0.599555061179088	1
GM18501	MGAT4B	NM_014275.4	7	6	34	0.0588235294117647	0	0.0588235294117647	1	1
GM18501	MGAT4B	NM_014275.4	9	8	84	0.230769230769231	0.0666666666666667	0.164102564102564	0.0575643199015124	0.87480634012233
GM18501	MGAT4B	NM_014275.4	10	9	39	0.05	0.210526315789474	-0.160526315789474	0.181764181764182	1
GM18501	MGAT4B	NM_014275.4	11	10	39	0.857142857142857	0.666666666666667	0.19047619047619	0.25523561007432	1
GM18501	MGAT4B	NM_014275.4	12	11	39	0.56	0.428571428571429	0.131428571428572	0.514475543396567	1
GM18501	MGAT4B	NM_014275.4	13	12	29	0.166666666666667	0	0.166666666666667	0.268472906403941	1
GM18501	MGAT4B	NM_014275.4	14	13	35	0.68421052631579	0.75	-0.0657894736842105	0.723328951360097	1
GM18501	MICA	NM_001177519.2	3	4	29	0.1	0	0.1	0.344827586206897	1
GM18501	MICA	NM_001289152.1	1	2	30	0.666666666666667	0.916666666666667	-0.25	0.193138815207781	1
GM18501	MICAL1	NM_001159291.1	10	9	126	0.0172413793103448	0	0.0172413793103448	0.46031746031746	1
GM18501	MICAL1	NM_001159291.1	11	10	43	0.642857142857143	0.413793103448276	0.229064039408867	0.202747085914524	1
GM18501	MICAL1	NM_001159291.1	12	11	66	0.888888888888889	0.948717948717949	-0.0598290598290598	0.392569124423963	1
GM18501	MICAL1	NM_001159291.1	13	12	37	0.15	0.117647058823529	0.0323529411764706	1	1
GM18501	MICAL1	NM_001159291.1	14	13	55	0.681818181818182	0.757575757575758	-0.0757575757575758	0.553340905668957	1
GM18501	MICAL1	NM_001159291.1	16	15	60	0	0.0263157894736842	-0.0263157894736842	1	1
GM18501	MICAL1	NM_001159291.1	17	16	164	0.982758620689655	1	-0.0172413793103449	0.353658536585366	1
GM18501	MICAL1	NM_001159291.1	18	17	85	0.4	0.2	0.2	0.0601205985318991	0.891630060563575
GM18501	MICAL1	NM_001159291.1	22	21	26	0.727272727272727	0.866666666666667	-0.139393939393939	0.619565217391304	1
GM18501	MICAL1	NM_001286613.1	7	6	227	0	0.00869565217391304	-0.00869565217391304	1	1
GM18501	MICAL1	NM_001286613.1	9	8	48	0.4375	0.15625	0.28125	0.0734562189814772	0.962242548392045
GM18501	MICB	NM_001289160.1	4	5	31	0.923076923076923	0.944444444444444	-0.0213675213675213	1	1
GM18501	MICU2	NM_152726.2	10	9	37	0.214285714285714	0	0.214285714285714	0.0468468468468468	0.797896495561606
GM18501	MIDN	NM_177401.4	2	3	29	0.333333333333333	0.272727272727273	0.0606060606060606	1	1
GM18501	MIER3	NM_001297598.1	12	11	30	0.0769230769230769	0	0.0769230769230769	0.433333333333333	1
GM18501	MIIP	NM_021933.3	4	5	32	0.9375	0.75	0.1875	0.332591768631813	1
GM18501	MIIP	NM_021933.3	5	6	243	1	0.992	0.00800000000000001	1	1
GM18501	MIIP	NM_021933.3	6	7	176	0.0879120879120879	0.0235294117647059	0.064382676147382	0.101386978769027	1
GM18501	MIIP	NM_021933.3	7	8	110	0	0.0188679245283019	-0.0188679245283019	0.481818181818182	1
GM18501	MINK1	NM_001024937.3	20	21	55	0.653846153846154	0.758620689655172	-0.104774535809019	0.553152414548097	1
GM18501	MINK1	NM_001024937.3	22	23	34	0.578947368421053	0.533333333333333	0.0456140350877193	1	1
GM18501	MINK1	NM_001024937.3	23	24	28	0	0.117647058823529	-0.117647058823529	0.505291005291005	1
GM18501	MINK1	NM_001024937.3	30	31	46	1	0.95	0.05	0.434782608695652	1
GM18501	MIOS	NM_019005.3	5	6	40	0.0526315789473684	0.0476190476190476	0.0050125313283208	1	1
GM18501	MIOS	NM_019005.3	9	10	39	0.0555555555555556	0.0476190476190476	0.00793650793650794	1	1
GM18501	MLF2	NM_005439.2	5	4	35	1	0.909090909090909	0.0909090909090909	0.519327731092437	1
GM18501	MLX	NM_170607.2	5	6	60	0	0.178571428571429	-0.178571428571429	0.0179950167645883	0.48007395299551
GM18501	MMD	NM_012329.2	5	4	27	0	0.266666666666667	-0.266666666666667	0.105982905982906	1
GM18501	MMS19	NM_001289403.1	21	20	27	0.923076923076923	1	-0.0769230769230769	0.481481481481482	1
GM18501	MMS19	NM_001289404.1	5	4	134	0.986666666666667	0.966101694915254	0.0205649717514125	0.58242366431683	1
GM18501	MMS19	NM_001289405.1	7	6	134	0.986666666666667	0.966101694915254	0.0205649717514125	0.58242366431683	1
GM18501	MOB2	NM_001172223.2	4	3	23	0	0.0769230769230769	-0.0769230769230769	1	1
GM18501	MPV17L2	NM_032683.2	1	2	27	0	0.133333333333333	-0.133333333333333	0.487179487179487	1
GM18501	MRGBP	NM_018270.5	2	3	34	0.866666666666667	0.894736842105263	-0.0280701754385965	1	1
GM18501	MRPL11	NM_016050.4	4	3	25	0.916666666666667	1	-0.0833333333333334	0.48	1
GM18501	MRPL17	NM_022061.3	2	1	37	0.0625	0	0.0625	0.432432432432433	1
GM18501	MRPL28	NM_006428.4	3	2	86	0.975	0.934782608695652	0.0402173913043478	0.619835605859043	1
GM18501	MRPL28	NM_006428.4	4	3	99	0	0.037037037037037	-0.037037037037037	0.499072356215213	1
GM18501	MRPL55	NM_001321284.1	3	2	27	0.307692307692308	0.428571428571429	-0.120879120879121	0.694584286803966	1
GM18501	MRPL55	NM_001321284.1	4	3	59	0	0.027027027027027	-0.027027027027027	1	1
GM18501	MRPL55	NM_181455.2	4	3	27	0.307692307692308	0.428571428571429	-0.120879120879121	0.694584286803966	1
GM18501	MRPL9	NM_001300733.1	2	1	42	1	0.941176470588235	0.0588235294117647	0.404761904761905	1
GM18501	MRPL9	NM_001300733.1	3	2	34	0.333333333333333	0.125	0.208333333333333	0.232682778845182	1
GM18501	MRPL9	NM_031420.3	4	3	39	0.9375	1	-0.0625	0.41025641025641	1
GM18501	MRS2	NM_001286264.1	10	11	29	0.0833333333333333	0.117647058823529	-0.0343137254901961	1	1
GM18501	MS4A1	NM_021950.3	5	6	22	0.1	0	0.1	0.454545454545454	1
GM18501	MSMO1	NM_001017369.2	3	4	34	0.736842105263158	0.933333333333333	-0.196491228070175	0.196009529304694	1
GM18501	MSMO1	NM_006745.4	2	3	44	0.0333333333333333	0	0.0333333333333333	1	1
GM18501	MTA1	NM_001203258.1	4	5	54	0.75	0.764705882352941	-0.0147058823529411	1	1
GM18501	MTA1	NM_001203258.1	13	14	25	0.9	0.933333333333333	-0.0333333333333333	1	1
GM18501	MTA1	NM_001203258.1	14	15	102	0.0638297872340425	0.0363636363636364	0.0274661508704062	0.659509348293773	1
GM18501	MTA1	NM_001203258.1	16	17	43	0.16	0.277777777777778	-0.117777777777778	0.455436385310703	1
GM18501	MTA1	NM_001203258.1	18	19	426	0.0187793427230047	0.028169014084507	-0.00938967136150235	0.750969470630253	1
GM18501	MTA1	NM_001203258.1	19	20	209	0.362745098039216	0.271028037383178	0.0917170606560381	0.180975882602714	1
GM18501	MTA1	NM_004689.3	13	14	40	0.954545454545455	1	-0.0454545454545454	1	1
GM18501	MTCH1	NM_001271641.1	8	7	23	0.8	0.692307692307692	0.107692307692308	0.660019614253024	1
GM18501	MTCH1	NM_001271641.1	9	8	62	0.108108108108108	0.16	-0.0518918918918919	0.703480071149479	1
GM18501	MTCH1	NM_001271641.1	11	10	277	0.9375	0.995305164319249	-0.0578051643192489	0.0109083688762136	0.355685269193626
GM18501	MTCH1	NM_014341.2	8	7	21	0.8	0.818181818181818	-0.0181818181818182	1	1
GM18501	MTCH1	NM_014341.2	9	8	59	0.0571428571428571	0.125	-0.0678571428571429	0.388169430003999	1
GM18501	MTERF3	NM_001286643.1	3	2	33	0.0625	0	0.0625	0.484848484848485	1
GM18501	MTFR1L	NM_001099625.1	1	2	24	0.833333333333333	0.916666666666667	-0.0833333333333333	1	1
GM18501	MTG1	NM_138384.2	7	8	231	0	0.0106382978723404	-0.0106382978723404	0.406926406926407	1
GM18501	MTOR	NM_004958.3	43	42	69	0.961538461538462	0.976744186046512	-0.01520572450805	1	1
GM18501	MTREX	NM_015360.4	25	26	22	1	0.9	0.1	0.454545454545455	1
GM18501	MUM1	NM_032853.3	3	4	26	0.0909090909090909	0	0.0909090909090909	0.423076923076923	1
GM18501	MUS81	NM_025128.4	5	6	86	0.94	0.944444444444444	-0.00444444444444447	1	1
GM18501	MUS81	NM_025128.4	6	7	128	0.0821917808219178	0.0727272727272727	0.00946450809464508	1	1
GM18501	MUS81	NM_025128.4	7	8	63	0.8	0.789473684210526	0.0105263157894737	1	1
GM18501	MUS81	NM_025128.4	8	9	218	0.851485148514851	0.777777777777778	0.0737073707370737	0.223502607793548	1
GM18501	MUS81	NM_025128.4	9	10	252	0	0.00840336134453781	-0.00840336134453781	0.472222222222222	1
GM18501	MUS81	NM_025128.4	10	11	91	0.75	0.581395348837209	0.168604651162791	0.118371348292601	1
GM18501	MUS81	NM_025128.4	11	12	345	0.97752808988764	0.964071856287425	0.0134562336002152	0.53183000751549	1
GM18501	MUS81	NM_025128.4	12	13	329	0.00571428571428571	0.025974025974026	-0.0202597402597403	0.189706699015047	1
GM18501	MUS81	NM_025128.4	13	14	86	0.219512195121951	0.266666666666667	-0.0471544715447154	0.626763275062323	1
GM18501	MUS81	NM_025128.4	14	15	142	0.987341772151899	0.936507936507936	0.0508338356439623	0.171007871947676	1
GM18501	MVD	NM_002461.2	5	4	31	0.133333333333333	0.375	-0.241666666666667	0.219972809294278	1
GM18501	MVD	NM_002461.2	6	5	28	0.0769230769230769	0	0.0769230769230769	0.464285714285714	1
GM18501	MVD	NM_002461.2	9	8	161	0	0.0114942528735632	-0.0114942528735632	1	1
GM18501	MX1	NM_001144925.2	5	6	27	0.5	0.235294117647059	0.264705882352941	0.219138755980861	1
GM18501	MX1	NM_001144925.2	11	12	394	1	0.996805111821086	0.00319488817891378	1	1
GM18501	MX1	NM_001144925.2	12	13	781	0.024390243902439	0.00486223662884927	0.0195280072735898	0.0386836362782505	0.735950674647927
GM18501	MX1	NM_001144925.2	13	14	54	0.037037037037037	0	0.037037037037037	1	1
GM18501	MX1	NM_001144925.2	15	16	700	0.0604395604395604	0.0654761904761905	-0.00503663003663004	0.876415175992088	1
GM18501	MX1	NM_001144925.2	16	17	231	0.133928571428571	0.117647058823529	0.016281512605042	0.842898867528078	1
GM18501	MX1	NM_001144925.2	17	18	276	0	0.00757575757575758	-0.00757575757575758	0.478260869565217	1
GM18501	MX2	NM_002463.1	10	11	22	0.2	0.0833333333333333	0.116666666666667	0.571428571428571	1
GM18501	MX2	NM_002463.1	11	12	23	0.1	0	0.1	0.434782608695652	1
GM18501	MX2	NM_002463.1	12	13	71	0.0238095238095238	0	0.0238095238095238	1	1
GM18501	MXD4	NM_006454.2	4	3	48	0	0.0416666666666667	-0.0416666666666667	1	1
GM18501	MYBBP1A	NM_001105538.1	22	21	75	0.941176470588235	0.951219512195122	-0.0100430416068866	1	1
GM18501	MYBBP1A	NM_001105538.1	23	22	89	0.177777777777778	0.0909090909090909	0.0868686868686869	0.352940883342688	1
GM18501	MYBBP1A	NM_001105538.1	24	23	43	0.0454545454545455	0.0476190476190476	-0.00216450216450216	1	1
GM18501	MYC	NM_002467.4	1	2	59	0.407407407407407	0.40625	0.00115740740740738	1	1
GM18501	MYD88	NM_001172567.1	1	2	60	0.393939393939394	0.333333333333333	0.0606060606060606	0.78852050384437	1
GM18501	MYL12A	NM_001303047.1	3	4	35	0.263157894736842	0.25	0.0131578947368421	1	1
GM18501	MYL12A	NM_006471.3	1	2	139	0.0273972602739726	0.0454545454545455	-0.0180572851805729	0.668194281358754	1
GM18501	MYL6	NM_021019.4	3	4	100	0.0377358490566038	0.106382978723404	-0.0686471296668005	0.248563506939796	1
GM18501	MYO19	NM_001163735.1	24	23	99	0.0185185185185185	0.0444444444444444	-0.0259259259259259	0.589445900197005	1
GM18501	MYO1C	NM_001080779.1	26	25	82	0.914285714285714	0.893617021276596	0.0206686930091186	1	1
GM18501	MYO1C	NM_001080779.1	27	26	31	0.538461538461538	0.388888888888889	0.14957264957265	0.480875793003329	1
GM18501	MYO1G	NM_033054.2	12	11	131	0.833333333333333	0.723076923076923	0.11025641025641	0.14525135807738	1
GM18501	MYO1G	NM_033054.2	13	12	434	0.004	0	0.004	1	1
GM18501	MYO1G	NM_033054.2	16	15	332	0.0339805825242718	0.0317460317460317	0.0022345507782401	1	1
GM18501	MYO1G	NM_033054.2	19	18	88	0.909090909090909	0.977272727272727	-0.0681818181818182	0.360378634212306	1
GM18501	MYO1G	NM_033054.2	20	19	570	0.995391705069124	0.919117647058824	0.076274058010301	5.1168914164109e-06	0.000585826702925501
GM18501	MYO1G	NM_033054.2	21	20	813	0.0201005025125628	0.0601851851851852	-0.0400846826726224	0.00928666888245327	0.321112153003546
GM18501	N4BP2L1	NM_001079691.1	2	1	38	0.0434782608695652	0.0666666666666667	-0.0231884057971014	1	1
GM18501	N4BP2L1	NM_001286459.1	4	3	23	0.0909090909090909	0	0.0909090909090909	0.478260869565217	1
GM18501	NAA60	NM_001083600.2	4	5	20	0.7	1	-0.3	0.210526315789474	1
GM18501	NAA60	NM_001083600.2	5	6	35	0.333333333333333	0.25	0.0833333333333333	0.711800991000101	1
GM18501	NAA60	NM_001317095.1	4	5	35	0.333333333333333	0.25	0.0833333333333333	0.711800991000101	1
GM18501	NACA	NM_001113201.2	7	6	21	0.8	0.363636363636364	0.436363636363636	0.0804953560371517	1
GM18501	NAGK	NM_017567.4	1	2	21	0.2	0.363636363636364	-0.163636363636364	0.635117204776647	1
GM18501	NAGK	NM_017567.4	4	5	54	0.96	1	-0.04	0.462962962962963	1
GM18501	NAGK	NM_017567.4	5	6	50	0.0434782608695652	0.037037037037037	0.00644122383252818	1	1
GM18501	NAGK	NM_017567.4	6	7	50	1	0.916666666666667	0.0833333333333334	0.22530612244898	1
GM18501	NAP1L4	NM_005969.3	13	12	33	0.0625	0	0.0625	0.484848484848485	1
GM18501	NAPA	NM_003827.3	6	5	107	1	0.963636363636364	0.0363636363636364	0.495679774290249	1
GM18501	NAPA	NM_003827.3	7	6	75	0.837837837837838	0.68421052631579	0.153627311522048	0.176448180025279	1
GM18501	NAPA	NM_003827.3	8	7	184	0.04	0.0833333333333333	-0.0433333333333333	0.349824961644327	1
GM18501	NAPA	NM_003827.3	10	9	47	1	0.961538461538462	0.0384615384615384	1	1
GM18501	NAPRT	NM_001286829.1	10	9	41	0.928571428571429	0.962962962962963	-0.0343915343915343	1	1
GM18501	NAPRT	NM_145201.5	11	10	44	1	0.878787878787879	0.121212121212121	0.557896442751803	1
GM18501	NAT9	NM_001305077.1	3	2	78	1	0.975	0.025	1	1
GM18501	NAT9	NM_001305077.1	4	3	46	0.352941176470588	0.517241379310345	-0.164300202839757	0.363475509615703	1
GM18501	NAT9	NM_001305077.1	5	4	86	0.9375	0.925925925925926	0.0115740740740741	1	1
GM18501	NAT9	NM_001305077.1	6	5	268	0.00645161290322581	0	0.00645161290322581	1	1
GM18501	NAT9	NM_001305078.1	3	2	78	1	0.975	0.025	1	1
GM18501	NAT9	NM_001305080.1	5	4	87	0.93939393939394	0.925925925925926	0.0134680134680135	1	1
GM18501	NAT9	NM_001305080.1	6	5	279	0.00625	0	0.00625	1	1
GM18501	NAT9	NM_001305081.1	5	4	87	0.93939393939394	0.925925925925926	0.0134680134680135	1	1
GM18501	NAT9	NM_001305081.1	6	5	267	0.00649350649350649	0	0.00649350649350649	1	1
GM18501	NAT9	NM_001305087.1	3	2	77	1	0.974358974358974	0.0256410256410257	1	1
GM18501	NAXD	NM_001242881.1	7	8	84	0.0684931506849315	0	0.0684931506849315	1	1
GM18501	NAXE	NM_144772.2	4	5	35	0.6	0.84	-0.24	0.186257372804517	1
GM18501	NBEAL2	NM_015175.2	27	28	41	0.0666666666666667	0.0384615384615385	0.0282051282051282	1	1
GM18501	NBEAL2	NM_015175.2	37	38	24	0.916666666666667	1	-0.0833333333333334	1	1
GM18501	NCAPD2	NM_014865.3	20	21	21	0.545454545454545	0.1	0.445454545454545	0.0634674922600619	0.914374042380923
GM18501	NCAPD2	NM_014865.3	22	23	32	0.875	1	-0.125	0.483870967741936	1
GM18501	NCAPD2	NM_014865.3	23	24	32	0.133333333333333	0.176470588235294	-0.0431372549019608	1	1
GM18501	NCAPD2	NM_014865.3	26	27	59	0.958333333333333	1	-0.0416666666666666	0.406779661016949	1
GM18501	NCAPD2	NM_014865.3	27	28	68	0	0.0232558139534884	-0.0232558139534884	1	1
GM18501	NCAPH	NM_001281710.1	12	13	31	0.933333333333333	1	-0.0666666666666667	0.483870967741936	1
GM18501	NCAPH2	NM_001185011.1	8	9	75	1	0.977272727272727	0.0227272727272727	1	1
GM18501	NCAPH2	NM_001185011.1	9	10	100	0.111111111111111	0.0363636363636364	0.0747474747474747	0.238333196585454	1
GM18501	NCAPH2	NM_001185011.1	14	15	76	0.973684210526316	0.973684210526316	0	1	1
GM18501	NCAPH2	NM_001185011.1	15	16	83	0.024390243902439	0.0476190476190476	-0.0232288037166086	1	1
GM18501	NCAPH2	NM_001185011.1	16	17	128	0.982758620689655	0.985714285714286	-0.00295566502463063	1	1
GM18501	NCAPH2	NM_001185011.1	17	18	120	0.103448275862069	0.112903225806452	-0.00945494994438265	1	1
GM18501	NCAPH2	NM_001185011.1	18	19	45	0.84	0.7	0.14	0.30105200099528	1
GM18501	NCAPH2	NM_152299.3	14	15	76	0.973684210526316	0.973684210526316	0	1	1
GM18501	NCAPH2	NM_152299.3	15	16	83	0.024390243902439	0.0476190476190476	-0.0232288037166086	1	1
GM18501	NCBP2	NM_001308036.1	3	2	50	0.6	0.666666666666667	-0.0666666666666667	0.765435980784577	1
GM18501	NCBP2	NM_007362.3	2	1	49	0.9375	0.757575757575758	0.179924242424242	0.238321171748409	1
GM18501	NCF1	NM_000265.5	7	8	25	0.923076923076923	1	-0.0769230769230769	1	1
GM18501	NCF4	NM_000631.4	7	8	325	1	0.995594713656388	0.00440528634361237	1	1
GM18501	NCLN	NM_001321463.1	5	6	42	0	0.0416666666666667	-0.0416666666666667	1	1
GM18501	NCOA3	NM_001174087.1	19	20	29	0.923076923076923	0.4375	0.485576923076923	0.00841008067394874	0.30197801792089
GM18501	NCOA3	NM_001174087.1	20	21	58	0	0.0555555555555556	-0.0555555555555556	0.310344827586207	1
GM18501	NCOA3	NM_001174088.1	19	20	29	0.923076923076923	0.4375	0.485576923076923	0.00841008067394874	0.30197801792089
GM18501	NCOA3	NM_181659.2	19	20	29	0.923076923076923	0.4375	0.485576923076923	0.00841008067394874	0.30197801792089
GM18501	NCSTN	NM_001290184.1	14	15	27	0.0588235294117647	0	0.0588235294117647	1	1
GM18501	NDUFAF4	NM_014165.3	2	1	28	0.0833333333333333	0	0.0833333333333333	0.428571428571428	1
GM18501	NDUFB10	NM_004548.2	1	2	22	0.1	0.5	-0.4	0.0743034055727554	0.965906439754592
GM18501	NDUFB10	NM_004548.2	2	3	59	0.714285714285714	0.838709677419355	-0.124423963133641	0.348279995586718	1
GM18501	NDUFS7	NM_024407.4	4	5	27	0.583333333333333	0.733333333333333	-0.15	0.44790236460717	1
GM18501	NDUFS7	NM_024407.4	6	7	75	1	0.893617021276596	0.106382978723404	0.150326517912858	1
GM18501	NDUFS8	NM_002496.3	1	2	26	0.230769230769231	0.230769230769231	0	1	1
GM18501	NDUFS8	NM_002496.3	2	3	73	1	0.96875	0.03125	0.438356164383562	1
GM18501	NDUFS8	NM_002496.3	4	5	29	0.769230769230769	0.5625	0.206730769230769	0.433483258370815	1
GM18501	NDUFV1	NM_001166102.1	2	3	128	0.0175438596491228	0	0.0175438596491228	0.4453125	1
GM18501	NDUFV1	NM_001166102.1	4	5	108	0.976190476190476	1	-0.0238095238095238	0.388888888888889	1
GM18501	NDUFV1	NM_001166102.1	6	7	47	0.0555555555555556	0.0344827586206897	0.0210727969348659	1	1
GM18501	NDUFV1	NM_001166102.1	8	9	22	0.272727272727273	0.454545454545454	-0.181818181818182	0.659442724458204	1
GM18501	NEK6	NM_001145001.2	9	10	37	0.705882352941177	0.45	0.255882352941177	0.184525319438508	1
GM18501	NELFB	NM_015456.4	1	2	40	0.952380952380952	1	-0.0476190476190477	1	1
GM18501	NELFB	NM_015456.4	2	3	51	0.0967741935483871	0.1	-0.00322580645161291	1	1
GM18501	NELFB	NM_015456.4	10	11	57	0.125	0.121212121212121	0.00378787878787878	1	1
GM18501	NELFB	NM_015456.4	11	12	38	0.615384615384615	0.72	-0.104615384615385	0.714373694040644	1
GM18501	NEPRO	NM_001319111.1	3	2	26	0.769230769230769	0.923076923076923	-0.153846153846154	0.59304347826087	1
GM18501	NEPRO	NM_001319112.1	5	4	49	0	0.0344827586206897	-0.0344827586206897	1	1
GM18501	NEPRO	NM_001319114.1	3	2	26	0.769230769230769	0.923076923076923	-0.153846153846154	0.59304347826087	1
GM18501	NFATC4	NM_001136022.2	5	6	52	1	0.975609756097561	0.024390243902439	1	1
GM18501	NFATC4	NM_001136022.2	6	7	75	0.0434782608695652	0.0192307692307692	0.024247491638796	0.522162162162162	1
GM18501	NFKBID	NM_139239.2	5	4	61	0.925925925925926	1	-0.0740740740740741	0.191803278688525	1
GM18501	NFKBIZ	NM_001005474.2	6	7	39	0.1875	0.0869565217391304	0.10054347826087	0.63088594667542	1
GM18501	NFKBIZ	NM_001005474.2	9	10	56	0.956521739130435	0.848484848484849	0.108036890645586	0.383544806408291	1
GM18501	NFKBIZ	NM_001005474.2	10	11	42	0.173913043478261	0.105263157894737	0.068649885583524	0.672861416763856	1
GM18501	NFKBIZ	NM_001005474.2	11	12	45	0.2	0.166666666666667	0.0333333333333334	1	1
GM18501	NFKBIZ	NM_031419.3	1	2	27	0.363636363636364	0.125	0.238636363636364	0.187365291713118	1
GM18501	NFYC	NM_001142587.1	7	8	38	0.954545454545455	0.9375	0.0170454545454546	1	1
GM18501	NFYC	NM_001142588.1	7	8	39	0.956521739130435	1	-0.0434782608695652	1	1
GM18501	NFYC	NM_001308114.1	8	9	23	0	0.1	-0.1	0.434782608695652	1
GM18501	NIFK	NM_032390.4	5	4	31	0.0588235294117647	0.0714285714285714	-0.0126050420168067	1	1
GM18501	NIN	NM_016350.4	22	21	24	0.909090909090909	0.923076923076923	-0.0139860139860141	1	1
GM18501	NIN	NM_020921.3	30	29	30	0.411764705882353	0.384615384615385	0.0271493212669683	1	1
GM18501	NKTR	NM_005385.3	14	15	32	1	0.916666666666667	0.0833333333333334	0.375	1
GM18501	NLRC5	NM_032206.4	27	28	82	0.804347826086957	0.805555555555556	-0.00120772946859904	1	1
GM18501	NLRC5	NM_032206.4	44	45	63	1	0.971428571428571	0.0285714285714286	1	1
GM18501	NLRC5	NM_032206.4	45	46	66	0.111111111111111	0.0333333333333333	0.0777777777777778	0.366258741258741	1
GM18501	NLRC5	NM_032206.4	46	47	126	0.078125	0.0645161290322581	0.0136088709677419	1	1
GM18501	NME4	NM_001286435.1	1	2	91	0	0.0727272727272727	-0.0727272727272727	0.149648104704285	1
GM18501	NME4	NM_001286435.1	2	3	60	0.0357142857142857	0	0.0357142857142857	0.466666666666667	1
GM18501	NMT1	NM_021079.4	10	11	79	0.285714285714286	0.0909090909090909	0.194805194805195	0.0367975489045123	0.71990668282077
GM18501	NOC2L	NM_015658.3	15	14	26	0	0.166666666666667	-0.166666666666667	0.203076923076923	1
GM18501	NOC2L	NM_015658.3	17	16	31	0.117647058823529	0.0714285714285714	0.046218487394958	1	1
GM18501	NOC3L	NM_022451.10	3	2	37	0.277777777777778	0.368421052631579	-0.0906432748538011	0.728106304302077	1
GM18501	NOC3L	NM_022451.10	4	3	25	0.0769230769230769	0.0833333333333333	-0.0064102564102564	1	1
GM18501	NOL11	NM_001303272.1	8	9	22	0.5	0.5	0	1	1
GM18501	NOL11	NM_001303272.1	10	11	21	0.6	0.454545454545454	0.145454545454545	0.66992140985949	1
GM18501	NOL11	NM_001303272.1	12	13	53	0.925925925925926	0.884615384615385	0.0413105413105413	0.66873541869578	1
GM18501	NOL11	NM_001303272.1	13	14	75	0	0.0263157894736842	-0.0263157894736842	1	1
GM18501	NOL6	NM_022917.4	13	12	27	0.533333333333333	0.5	0.0333333333333333	1	1
GM18501	NOL6	NM_022917.4	16	15	38	1	0.947368421052632	0.0526315789473685	1	1
GM18501	NOL6	NM_022917.4	17	16	48	0.0869565217391304	0.12	-0.0330434782608696	1	1
GM18501	NOL8	NM_001256394.1	14	13	27	0.846153846153846	0.928571428571429	-0.0824175824175825	0.595555555555556	1
GM18501	NOL8	NM_001256394.1	15	14	25	0.0909090909090909	0.0714285714285714	0.0194805194805195	1	1
GM18501	NOLC1	NM_001284388.1	8	9	52	0.0303030303030303	0	0.0303030303030303	1	1
GM18501	NOLC1	NM_001284388.1	10	11	30	0.357142857142857	0.375	-0.0178571428571428	1	1
GM18501	NOLC1	NM_001284388.1	11	12	31	0.235294117647059	0.142857142857143	0.092436974789916	0.663824001977506	1
GM18501	NOP53	NM_015710.4	6	7	55	0.875	0.733333333333333	0.141666666666667	0.236033371780886	1
GM18501	NOP53	NM_015710.4	7	8	58	0.0476190476190476	0.25	-0.202380952380952	0.0434457923756969	0.76851999534553
GM18501	NOP53	NM_015710.4	10	11	121	0.0188679245283019	0	0.0188679245283019	0.43801652892562	1
GM18501	NOP56	NM_006392.3	1	2	33	0.35	0.769230769230769	-0.419230769230769	0.032361238735471	0.674461049922702
GM18501	NOP56	NM_006392.3	2	3	145	0.955223880597015	0.987179487179487	-0.0319556065824723	0.335640278452323	1
GM18501	NOP56	NM_006392.3	3	4	194	0	0.0188679245283019	-0.0188679245283019	0.501736018375087	1
GM18501	NOP56	NM_006392.3	4	5	59	0.896551724137931	0.966666666666667	-0.0701149425287356	0.353256021409456	1
GM18501	NOP56	NM_006392.3	5	6	88	0.94	0.81578947368421	0.124210526315789	0.0933533180136686	1
GM18501	NOP56	NM_006392.3	6	7	66	0.764705882352941	0.625	0.139705882352941	0.286313782164402	1
GM18501	NOP56	NM_006392.3	7	8	176	0.990909090909091	0.984848484848485	0.0060606060606061	1	1
GM18501	NOP56	NM_006392.3	8	9	108	0	0.0444444444444444	-0.0444444444444444	0.171339563862928	1
GM18501	NOP56	NM_006392.3	9	10	167	0.150943396226415	0.311475409836066	-0.16053201360965	0.0179863020933201	0.48007395299551
GM18501	NOP56	NM_006392.3	10	11	224	0.981366459627329	0.873015873015873	0.108350586611456	0.00213549944693391	0.106072833423482
GM18501	NPC1	NM_000271.4	23	22	42	0.956521739130435	0.736842105263158	0.219679633867277	0.0753982339348193	0.972218338681754
GM18501	NPC1	NM_000271.4	24	23	42	0.0416666666666667	0.333333333333333	-0.291666666666667	0.0305231665950536	0.654313153936452
GM18501	NPEPL1	NM_001204872.1	8	9	40	0.952380952380952	1	-0.0476190476190477	1	1
GM18501	NPEPL1	NM_001204872.1	9	10	58	0.678571428571429	0.666666666666667	0.011904761904762	1	1
GM18501	NPEPL1	NM_001204872.1	11	12	20	0.4	0.7	-0.3	0.369849964277209	1
GM18501	NPHP4	NM_001291593.1	26	25	25	0.7	1	-0.3	0.0521739130434783	0.840942028985507
GM18501	NPM1	NM_001037738.2	8	9	60	0.96551724137931	0.967741935483871	-0.00222469410456061	1	1
GM18501	NPM1	NM_002520.6	8	9	81	0.736842105263158	0.697674418604651	0.0391676866585067	0.806525749353798	1
GM18501	NPM1	NM_002520.6	9	10	83	0.05	0.0930232558139535	-0.0430232558139535	0.676963832827795	1
GM18501	NPM1	NM_199185.3	7	8	24	0.0909090909090909	0	0.0909090909090909	0.458333333333333	1
GM18501	NPRL3	NM_001039476.2	9	8	20	0.3	0.1	0.2	0.582043343653251	1
GM18501	NR1H2	NM_001256647.1	7	8	43	0.761904761904762	0.681818181818182	0.0800865800865801	0.736039848915629	1
GM18501	NR1H2	NM_007121.5	4	5	66	0.96	0.829268292682927	0.130731707317073	0.143396653300838	1
GM18501	NR1H2	NM_007121.5	5	6	86	0.0588235294117647	0.0384615384615385	0.0203619909502262	0.646159388384101	1
GM18501	NSMCE4A	NM_001167865.1	9	8	31	0.0833333333333333	0.0526315789473684	0.0307017543859649	1	1
GM18501	NSMCE4A	NM_017615.2	9	8	31	0.0833333333333333	0.0526315789473684	0.0307017543859649	1	1
GM18501	NSUN2	NM_001193455.1	12	11	29	0.357142857142857	0.866666666666667	-0.50952380952381	0.0077750598385018	0.287688482227231
GM18501	NSUN2	NM_001193455.1	13	12	66	0.08	0.829268292682927	-0.749268292682927	1.81579791166583e-09	3.73864003893066e-07
GM18501	NSUN2	NM_001193455.1	14	13	63	1	0.875	0.125	0.0509682455742741	0.832014244090021
GM18501	NSUN5	NM_001168347.2	3	2	43	0	0.0666666666666667	-0.0666666666666667	0.348837209302326	1
GM18501	NSUN5	NM_001168347.2	5	4	36	0.0625	0.1	-0.0375	1	1
GM18501	NSUN5	NM_001168347.2	6	5	53	0.954545454545455	1	-0.0454545454545454	0.415094339622642	1
GM18501	NSUN5	NM_001168347.2	7	6	57	0	0.107142857142857	-0.107142857142857	0.111961722488038	1
GM18501	NSUN5	NM_001168347.2	8	7	34	0.642857142857143	0.25	0.392857142857143	0.0351361709174738	0.703648611085809
GM18501	NSUN5	NM_001168347.2	9	8	163	0.978021978021978	0.972222222222222	0.00579975579975578	1	1
GM18501	NSUN5	NM_148956.3	9	8	162	0.977777777777778	0.972222222222222	0.00555555555555554	1	1
GM18501	NT5DC2	NM_001134231.1	2	1	68	0	0.0227272727272727	-0.0227272727272727	1	1
GM18501	NT5DC2	NM_001134231.1	4	3	37	0.909090909090909	0.933333333333333	-0.0242424242424243	1	1
GM18501	NT5DC2	NM_001134231.1	8	7	44	0.952380952380952	0.956521739130435	-0.00414078674948248	1	1
GM18501	NT5DC2	NM_001134231.1	9	8	46	0.263157894736842	0.259259259259259	0.00389863547758285	1	1
GM18501	NT5DC2	NM_001134231.1	10	9	72	0.025	0.03125	-0.00625	1	1
GM18501	NT5DC2	NM_001134231.1	11	10	29	0.714285714285714	0.733333333333333	-0.019047619047619	1	1
GM18501	NT5DC2	NM_001134231.1	12	11	35	0.333333333333333	0.352941176470588	-0.0196078431372549	1	1
GM18501	NT5DC2	NM_001134231.1	13	12	37	0.105263157894737	0	0.105263157894737	0.486486486486486	1
GM18501	NTPCR	NM_032324.1	3	4	29	0.0625	0	0.0625	1	1
GM18501	NUB1	NM_016118.4	11	12	31	0.6875	0.666666666666667	0.0208333333333334	1	1
GM18501	NUMA1	NM_001286561.1	21	20	109	0.0172413793103448	0	0.0172413793103448	1	1
GM18501	NUP153	NM_001278209.1	22	21	39	1	0.909090909090909	0.0909090909090909	0.49527665317139	1
GM18501	NUP205	NM_015135.2	40	41	48	0.12	0.0434782608695652	0.0765217391304348	0.609929078014184	1
GM18501	NUP205	NM_015135.2	41	42	31	0.0769230769230769	0.166666666666667	-0.0897435897435897	0.620721436516765	1
GM18501	NUP210	NM_024923.3	34	33	79	0	0.024390243902439	-0.024390243902439	1	1
GM18501	NUP210	NM_024923.3	37	36	37	0	0.111111111111111	-0.111111111111111	0.22972972972973	1
GM18501	NUP210	NM_024923.3	39	38	39	0.823529411764706	0.909090909090909	-0.0855614973262032	0.63623542570911	1
GM18501	NUP85	NM_001303276.1	7	8	25	0.857142857142857	0.818181818181818	0.0389610389610389	1	1
GM18501	NUP85	NM_001303276.1	8	9	40	0.703703703703704	0.615384615384615	0.0883190883190883	0.721514351689628	1
GM18501	NUP85	NM_001303276.1	9	10	39	0	0.0666666666666667	-0.0666666666666667	0.384615384615385	1
GM18501	NUP85	NM_001303276.1	10	11	49	0.285714285714286	0.178571428571429	0.107142857142857	0.493657191820381	1
GM18501	NUP85	NM_001303276.1	12	13	29	0.916666666666667	0.941176470588235	-0.0245098039215687	1	1
GM18501	NUP85	NM_001303276.1	13	14	64	0.695652173913043	0.609756097560976	0.0858960763520679	0.59174584232385	1
GM18501	NUP88	NM_001320653.1	13	12	32	0.75	0.916666666666667	-0.166666666666667	0.370365220615499	1
GM18501	NUP88	NM_001320653.1	15	14	34	0.0454545454545455	0.0833333333333333	-0.0378787878787879	1	1
GM18501	NUP88	NM_001320653.1	16	15	26	1	0.9375	0.0625	1	1
GM18501	NUP98	NM_016320.4	30	29	25	0.0909090909090909	0	0.0909090909090909	0.44	1
GM18501	NUPL2	NM_007342.2	3	4	64	0	0.0222222222222222	-0.0222222222222222	1	1
GM18501	OAS1	NM_001032409.2	2	3	37	0	0.0909090909090909	-0.0909090909090909	0.504504504504504	1
GM18501	OAS1	NM_001032409.2	3	4	40	0.333333333333333	0.272727272727273	0.0606060606060606	0.738453675717302	1
GM18501	OAS2	NM_002535.2	8	9	34	0.958333333333333	1	-0.0416666666666666	1	1
GM18501	OAS3	NM_006187.3	13	14	66	1	0.974358974358974	0.0256410256410257	1	1
GM18501	ODF2	NM_001242352.1	16	17	92	0.975609756097561	1	-0.024390243902439	0.445652173913044	1
GM18501	ODF2	NM_001242352.1	17	18	103	0.0256410256410256	0	0.0256410256410256	0.378640776699029	1
GM18501	ODF2L	NM_001007022.2	15	14	69	0.0444444444444444	0	0.0444444444444444	0.539641943734015	1
GM18501	ODF3B	NM_001014440.3	5	4	72	0.970588235294118	0.973684210526316	-0.00309597523219818	1	1
GM18501	ODF3B	NM_001014440.3	6	5	42	0.894736842105263	0.91304347826087	-0.0183066361556063	1	1
GM18501	OGFOD2	NM_001304833.1	2	3	38	0.0625	0	0.0625	0.421052631578947	1
GM18501	OGFR	NM_007346.2	2	3	78	0.241379310344828	0.0408163265306122	0.200562983814215	0.0112730597067041	0.362491757809126
GM18501	OGFR	NM_007346.2	3	4	40	0.15	0.1	0.05	1	1
GM18501	OPTN	NM_001008211.1	9	10	29	0.0666666666666667	0.142857142857143	-0.0761904761904762	0.597701149425287	1
GM18501	OPTN	NM_001008211.1	10	11	32	0.333333333333333	0.7	-0.366666666666667	0.0683311570021441	0.935165014694087
GM18501	OS9	NM_001017956.2	6	7	132	0.492753623188406	0.523809523809524	-0.031055900621118	0.731162682516149	1
GM18501	OS9	NM_001017956.2	12	13	98	0.0178571428571429	0	0.0178571428571429	1	1
GM18501	OS9	NM_001017958.2	13	14	101	0.0350877192982456	0.0454545454545455	-0.0103668261562998	1	1
GM18501	OS9	NM_001261420.1	6	7	132	0.492753623188406	0.523809523809524	-0.031055900621118	0.731162682516149	1
GM18501	OSBPL9	NM_024586.5	17	18	23	0.916666666666667	0.727272727272727	0.189393939393939	0.316770186335404	1
GM18501	OSBPL9	NM_024586.5	19	20	25	0.636363636363636	0.785714285714286	-0.149350649350649	0.656407322654462	1
GM18501	OSBPL9	NM_024586.5	20	21	57	0.09375	0.04	0.05375	0.623300675932255	1
GM18501	OSBPL9	NM_024586.5	21	22	32	0.5625	0.375	0.1875	0.4794877603643	1
GM18501	OSBPL9	NM_024586.5	22	23	30	0.444444444444444	0.333333333333333	0.111111111111111	0.708594424592215	1
GM18501	OTUB1	NM_017670.2	5	6	48	0	0.0476190476190476	-0.0476190476190476	0.4375	1
GM18501	OXA1L	NM_005015.3	1	2	42	0.586206896551724	0.307692307692308	0.278514588859416	0.180943925829842	1
GM18501	OXA1L	NM_005015.3	2	3	80	0.666666666666667	0.634146341463415	0.032520325203252	0.817345523751024	1
GM18501	OXA1L	NM_005015.3	3	4	203	0.0280373831775701	0.0104166666666667	0.0176207165109034	0.623502348764396	1
GM18501	OXA1L	NM_005015.3	6	7	97	0.0196078431372549	0	0.0196078431372549	1	1
GM18501	OXA1L	NM_005015.3	8	9	29	0.9375	0.923076923076923	0.0144230769230769	1	1
GM18501	OXSR1	NM_005109.2	16	17	28	0	0.0714285714285714	-0.0714285714285714	1	1
GM18501	P2RX1	NM_002558.3	10	9	32	1	0.947368421052632	0.0526315789473685	1	1
GM18501	P3H1	NM_001146289.1	12	11	44	0.136363636363636	0.363636363636364	-0.227272727272727	0.162277727791057	1
GM18501	P3H1	NM_001146289.1	13	12	59	0.941176470588235	1	-0.0588235294117647	0.503214494447691	1
GM18501	P3H1	NM_001146289.1	14	13	60	0.740740740740741	0.606060606060606	0.134680134680135	0.409409125428978	1
GM18501	P3H1	NM_022356.3	14	13	60	0.740740740740741	0.606060606060606	0.134680134680135	0.409409125428978	1
GM18501	P4HB	NM_000918.3	8	7	40	0.954545454545455	1	-0.0454545454545454	1	1
GM18501	PACSIN2	NM_001184970.1	8	7	53	0.142857142857143	0.12	0.0228571428571429	1	1
GM18501	PACSIN2	NM_001184970.1	10	9	45	0.0384615384615385	0	0.0384615384615385	1	1
GM18501	PAICS	NM_001079524.1	6	7	49	0.25	0.172413793103448	0.0775862068965517	0.719941396894629	1
GM18501	PARP10	NM_001317895.1	2	1	56	0.966666666666667	0.961538461538462	0.00512820512820511	1	1
GM18501	PARP10	NM_001317895.1	3	2	82	0.463414634146341	0.48780487804878	-0.024390243902439	1	1
GM18501	PARP10	NM_001317895.1	4	3	223	0.89908256880734	0.93859649122807	-0.0395139224207307	0.330450077507891	1
GM18501	PARP10	NM_001317895.1	5	4	184	0.08	0.0952380952380952	-0.0152380952380952	0.795649127669528	1
GM18501	PARP10	NM_001317895.1	6	5	286	0.94078947368421	0.880597014925373	0.0601924587588374	0.0929386642426948	1
GM18501	PARP10	NM_001317895.1	9	8	74	0.487179487179487	0.657142857142857	-0.16996336996337	0.164268522713372	1
GM18501	PARP14	NM_017554.2	15	16	547	0.00396825396825397	0	0.00396825396825397	0.460694698354662	1
GM18501	PARP15	NM_001113523.2	6	7	25	0.0666666666666667	0.3	-0.233333333333333	0.266798418972332	1
GM18501	PARP2	NM_001042618.1	9	10	36	0.117647058823529	0.105263157894737	0.0123839009287926	1	1
GM18501	PARP4	NM_006437.3	31	30	35	0.0869565217391304	0.416666666666667	-0.329710144927536	0.0330759667604528	0.681726453770633
GM18501	PASK	NM_001252119.1	15	14	70	0	0.048780487804878	-0.048780487804878	0.507660455486542	1
GM18501	PASK	NM_001252119.1	16	15	114	0	0.0169491525423729	-0.0169491525423729	1	1
GM18501	PASK	NM_001252119.1	17	16	29	0.764705882352941	0.833333333333333	-0.0686274509803922	1	1
GM18501	PASK	NM_001252120.1	16	15	70	0	0.048780487804878	-0.048780487804878	0.507660455486542	1
GM18501	PBX2	NM_002586.4	6	5	35	0.947368421052632	1	-0.0526315789473685	1	1
GM18501	PBX2	NM_002586.4	8	7	27	1	0.8125	0.1875	0.247863247863248	1
GM18501	PCF11	NM_015885.3	11	12	23	0.1	0	0.1	0.434782608695652	1
GM18501	PCGF3	NM_001317836.1	5	6	39	0.0909090909090909	0	0.0909090909090909	0.282051282051282	1
GM18501	PCNA	NM_002592.2	2	1	67	0.0416666666666667	0	0.0416666666666667	0.358208955223881	1
GM18501	PCNA	NM_002592.2	3	2	85	0.540540540540541	0.75	-0.209459459459459	0.0644261853990639	0.918931718309593
GM18501	PCNA	NM_002592.2	4	3	75	0.404761904761905	0.696969696969697	-0.292207792207792	0.0192094518136841	0.498918122334862
GM18501	PCNA	NM_002592.2	5	4	322	0.0119760479041916	0.0129032258064516	-0.000927177902259995	1	1
GM18501	PCNA	NM_002592.2	6	5	58	0.407407407407407	0.32258064516129	0.0848267622461171	0.588432139024368	1
GM18501	PCNT	NM_001315529.1	44	45	33	0.272727272727273	0	0.272727272727273	0.0769605116796441	0.984408228303102
GM18501	PCNX4	NM_022495.5	2	3	23	0.909090909090909	0.75	0.159090909090909	0.590062111801242	1
GM18501	PCSK7	NM_004716.3	8	7	38	1	0.96	0.04	1	1
GM18501	PCSK7	NM_004716.3	16	15	24	0.75	0.416666666666667	0.333333333333333	0.213756898640463	1
GM18501	PDCD5	NM_004708.3	2	3	22	0.2	0.0833333333333333	0.116666666666667	0.571428571428571	1
GM18501	PDCD5	NM_004708.3	3	4	38	0.944444444444444	1	-0.0555555555555556	0.473684210526316	1
GM18501	PDCD6	NM_001267556.1	4	5	93	0.0677966101694915	0.0588235294117647	0.00897308075772682	1	1
GM18501	PDCD6	NM_001267558.1	5	6	93	0.0677966101694915	0.0588235294117647	0.00897308075772682	1	1
GM18501	PDCD6IP	NM_001162429.2	15	16	24	0	0.333333333333333	-0.333333333333333	0.093167701863354	1
GM18501	PDIA4	NM_004911.4	5	4	35	0.857142857142857	1	-0.142857142857143	0.152941176470588	1
GM18501	PDIA4	NM_004911.4	9	8	34	0.0625	0	0.0625	0.470588235294118	1
GM18501	PDIA6	NM_001282704.1	14	13	70	0.903225806451613	0.82051282051282	0.0827129859387924	0.494621643858948	1
GM18501	PELI1	NM_020651.3	5	4	21	0.1	0.0909090909090909	0.00909090909090909	1	1
GM18501	PELP1	NM_001278241.1	10	9	26	1	0.933333333333333	0.0666666666666667	1	1
GM18501	PEX6	NM_000287.3	10	9	35	0.904761904761905	0.857142857142857	0.0476190476190477	1	1
GM18501	PEX6	NM_000287.3	12	11	33	0.863636363636364	0.818181818181818	0.0454545454545454	1	1
GM18501	PEX6	NM_000287.3	14	13	33	0.952380952380952	1	-0.0476190476190477	1	1
GM18501	PFKL	NM_001002021.2	18	19	68	0	0.161290322580645	-0.161290322580645	0.0162997806627087	0.455306017614458
GM18501	PFKL	NM_001002021.2	21	22	187	1	0.978947368421053	0.0210526315789473	0.497441205221091	1
GM18501	PGGHG	NM_025092.4	3	4	85	0.513513513513513	0.416666666666667	0.0968468468468468	0.390200049581441	1
GM18501	PGGHG	NM_025092.4	4	5	134	0.015625	0	0.015625	0.477611940298507	1
GM18501	PGGHG	NM_025092.4	7	8	113	0.959183673469388	1	-0.0408163265306123	0.185840707964602	1
GM18501	PGGHG	NM_025092.4	8	9	41	0.611111111111111	0.347826086956522	0.263285024154589	0.121998098915541	1
GM18501	PGGHG	NM_025092.4	12	13	24	0	0.785714285714286	-0.785714285714286	0.000151433571140127	0.011680515120177
GM18501	PGS1	NM_024419.4	8	9	45	0.970588235294118	1	-0.0294117647058824	1	1
GM18501	PHF11	NM_001040443.2	4	5	38	0.851851851851852	0.818181818181818	0.0336700336700336	1	1
GM18501	PHGDH	NM_006623.3	9	10	46	0.96	0.952380952380952	0.00761904761904764	1	1
GM18501	PHGDH	NM_006623.3	10	11	53	0	0.0384615384615385	-0.0384615384615385	0.490566037735849	1
GM18501	PHYKPL	NM_001278346.1	7	6	31	0.428571428571429	0.470588235294118	-0.0420168067226891	1	1
GM18501	PHYKPL	NM_153373.3	2	1	38	0	0.0625	-0.0625	0.421052631578947	1
GM18501	PI4KA	NM_058004.3	49	48	65	0	0.03125	-0.03125	0.492307692307692	1
GM18501	PI4KA	NM_058004.3	52	51	103	0.04	0.0377358490566038	0.00226415094339623	1	1
GM18501	PI4KA	NM_058004.3	53	52	53	0.111111111111111	0	0.111111111111111	0.235849056603774	1
GM18501	PIEZO1	NM_001142864.3	41	40	25	1	0.923076923076923	0.0769230769230769	1	1
GM18501	PIEZO1	NM_001142864.3	42	41	30	0.0666666666666667	0	0.0666666666666667	1	1
GM18501	PIEZO1	NM_001142864.3	46	45	34	0.25	0.277777777777778	-0.0277777777777778	1	1
GM18501	PIEZO1	NM_001142864.3	47	46	35	0.277777777777778	0.0588235294117647	0.218954248366013	0.17741935483871	1
GM18501	PIEZO1	NM_001142864.3	48	47	69	0.888888888888889	0.976190476190476	-0.0873015873015873	0.291879361620172	1
GM18501	PIEZO1	NM_001142864.3	49	48	43	0.117647058823529	0.230769230769231	-0.113122171945701	0.446160791952953	1
GM18501	PIEZO1	NM_001142864.3	50	49	118	0.693877551020408	0.666666666666667	0.0272108843537415	0.84250927131299	1
GM18501	PIF1	NM_001286496.1	3	2	44	1	0.928571428571429	0.0714285714285714	0.526427061310782	1
GM18501	PIF1	NM_001286496.1	4	3	53	0.791666666666667	0.724137931034483	0.0675287356321839	0.750325052322041	1
GM18501	PIF1	NM_001286496.1	6	5	67	0.28	0.238095238095238	0.0419047619047619	0.77513923436321	1
GM18501	PIF1	NM_001286496.1	9	8	47	0.961538461538462	0.952380952380952	0.00915750915750924	1	1
GM18501	PIF1	NM_001286496.1	10	9	71	0.393939393939394	0.5	-0.106060606060606	0.474335729703189	1
GM18501	PIF1	NM_001286496.1	11	10	46	0.142857142857143	0.16	-0.0171428571428572	1	1
GM18501	PIF1	NM_001286496.1	12	11	76	0.0645161290322581	0.0444444444444444	0.0200716845878136	1	1
GM18501	PIGT	NM_001184728.2	8	9	41	0.111111111111111	0.0869565217391304	0.0241545893719807	1	1
GM18501	PIH1D1	NM_017916.2	4	3	34	0.523809523809524	0.538461538461538	-0.0146520146520146	1	1
GM18501	PIH1D1	NM_017916.2	5	4	91	0.0925925925925926	0.027027027027027	0.0655655655655656	0.394881350144769	1
GM18501	PIK3CD	NM_005026.3	4	5	52	0.964285714285714	1	-0.0357142857142857	1	1
GM18501	PIK3CD	NM_005026.3	5	6	50	0.111111111111111	0.173913043478261	-0.0628019323671498	0.688829787234043	1
GM18501	PIK3CD	NM_005026.3	6	7	31	0.1875	0.266666666666667	-0.0791666666666667	0.685082190087752	1
GM18501	PIK3CD	NM_005026.3	11	12	27	0	0.0666666666666667	-0.0666666666666667	1	1
GM18501	PIK3CD	NM_005026.3	13	14	50	0.925925925925926	0.956521739130435	-0.0305958132045089	1	1
GM18501	PIK3CD	NM_005026.3	14	15	62	0.793103448275862	0.818181818181818	-0.0250783699059561	1	1
GM18501	PIK3CD	NM_005026.3	15	16	94	0.06	0.0454545454545455	0.0145454545454545	1	1
GM18501	PIK3CD	NM_005026.3	19	20	78	0.975609756097561	0.918918918918919	0.056690837178642	0.340631298526035	1
GM18501	PIK3CD	NM_005026.3	20	21	54	0.28125	0.545454545454545	-0.264204545454545	0.087240743632341	1
GM18501	PIK3CD	NM_005026.3	21	22	87	0.0434782608695652	0.048780487804878	-0.00530222693531283	1	1
GM18501	PIK3R6	NM_001010855.3	19	18	29	0.473684210526316	0.2	0.273684210526316	0.234374021780319	1
GM18501	PIM3	NM_001001852.3	4	5	33	0.125	0	0.125	0.227272727272727	1
GM18501	PISD	NM_014338.3	5	4	71	0.6	0.717391304347826	-0.117391304347826	0.426374061756556	1
GM18501	PISD	NM_014338.3	6	5	128	0.446808510638298	0.481481481481482	-0.0346729708431836	0.717647243784722	1
GM18501	PISD	NM_014338.3	7	6	149	0.415384615384615	0.488095238095238	-0.0727106227106227	0.410096778052316	1
GM18501	PISD	NM_014338.3	8	7	133	0.226415094339623	0.25	-0.0235849056603774	0.83735749832757	1
GM18501	PITPNM1	NM_001130848.1	14	13	52	0.869565217391304	0.862068965517241	0.007496251874063	1	1
GM18501	PITPNM1	NM_004910.2	14	13	52	0.869565217391304	0.862068965517241	0.007496251874063	1	1
GM18501	PITRM1	NM_001242307.1	16	15	61	1	0.96	0.04	0.40983606557377	1
GM18501	PITRM1	NM_001242307.1	23	22	40	0	0.0666666666666667	-0.0666666666666667	0.375	1
GM18501	PITRM1	NM_001242307.1	25	24	45	0.967741935483871	1	-0.032258064516129	1	1
GM18501	PITRM1	NM_001242307.1	26	25	51	0	0.0588235294117647	-0.0588235294117647	0.333333333333333	1
GM18501	PKMYT1	NM_001258450.1	4	3	42	0.958333333333333	0.944444444444444	0.013888888888889	1	1
GM18501	PKMYT1	NM_001258450.1	5	4	42	0.347826086956522	0.473684210526316	-0.125858123569794	0.531095780505694	1
GM18501	PKMYT1	NM_001258450.1	6	5	35	0.0476190476190476	0	0.0476190476190476	1	1
GM18501	PKMYT1	NM_001258450.1	7	6	70	0.878048780487805	0.793103448275862	0.0849453322119428	0.506462722438235	1
GM18501	PKMYT1	NM_001258450.1	8	7	65	0.65625	0.333333333333333	0.322916666666667	0.0132209176043575	0.402436316525999
GM18501	PKN1	NM_002741.3	12	13	36	0.869565217391304	0.846153846153846	0.0234113712374582	1	1
GM18501	PKN1	NM_002741.3	13	14	36	0.3	0.4375	-0.1375	0.493239401804474	1
GM18501	PKN1	NM_002741.3	14	15	27	0.307692307692308	0.0714285714285714	0.236263736263736	0.164734299516908	1
GM18501	PKN1	NM_002741.3	15	16	185	0.993464052287582	0.96875	0.0247140522875817	0.316803760282021	1
GM18501	PKN1	NM_002741.3	16	17	127	0	0.2	-0.2	0.000468812366196161	0.0313331113124455
GM18501	PKN1	NM_002741.3	17	18	94	0.0694444444444444	0.0909090909090909	-0.0214646464646465	0.664194966154511	1
GM18501	PKN1	NM_002741.3	18	19	30	0.157894736842105	0.181818181818182	-0.0239234449760766	1	1
GM18501	PKN1	NM_002741.3	19	20	94	0.957446808510638	0.978723404255319	-0.0212765957446808	1	1
GM18501	PKN1	NM_002741.3	20	21	98	0.02	0	0.02	1	1
GM18501	PLA2G4B	NM_001114633.1	11	12	26	1	0.428571428571429	0.571428571428571	0.00223904242210878	0.108885699197827
GM18501	PLCB2	NM_001284297.1	18	17	39	0	0.166666666666667	-0.166666666666667	0.145785461574935	1
GM18501	PLCB2	NM_001284297.1	24	23	55	0.970588235294118	1	-0.0294117647058824	1	1
GM18501	PLCB2	NM_001284297.1	27	26	29	0	0.117647058823529	-0.117647058823529	0.497536945812808	1
GM18501	PLCB2	NM_001284298.1	24	23	55	0.970588235294118	1	-0.0294117647058824	1	1
GM18501	PLCG2	NM_002661.4	24	25	201	0.038961038961039	0.00806451612903226	0.0308965228320067	0.157941448536213	1
GM18501	PLCG2	NM_002661.4	25	26	34	0.266666666666667	0.473684210526316	-0.207017543859649	0.295505876094211	1
GM18501	PLCG2	NM_002661.4	26	27	86	0.935483870967742	0.166666666666667	0.768817204301075	4.8394312867317e-12	1.30058442296365e-09
GM18501	PLEK	NM_002664.2	4	5	79	0.151515151515152	0.195652173913043	-0.044137022397892	0.767726336591799	1
GM18501	PLEK	NM_002664.2	5	6	52	0	0.0454545454545455	-0.0454545454545455	0.423076923076923	1
GM18501	PLEK	NM_002664.2	6	7	21	0.181818181818182	0.1	0.0818181818181818	1	1
GM18501	PLEKHM2	NM_015164.2	9	10	68	0.27027027027027	0.161290322580645	0.108979947689625	0.381627566529675	1
GM18501	PLEKHM2	NM_015164.2	10	11	61	1	0.96	0.04	0.40983606557377	1
GM18501	PLEKHM2	NM_015164.2	11	12	80	0	0.027027027027027	-0.027027027027027	0.4625	1
GM18501	PLEKHM2	NM_015164.2	12	13	49	0.0740740740740741	0	0.0740740740740741	0.494897959183674	1
GM18501	PLEKHM2	NM_015164.2	16	17	61	0.6	0.576923076923077	0.0230769230769231	1	1
GM18501	PLEKHM2	NM_015164.2	17	18	147	0.714285714285714	0.771428571428571	-0.0571428571428572	0.456346056903613	1
GM18501	PLEKHM2	NM_015164.2	18	19	142	0.123287671232877	0.159420289855072	-0.0361326186221958	0.631929388575666	1
GM18501	PLK1	NM_005030.5	8	9	33	0.294117647058824	0.125	0.169117647058824	0.39832136717565	1
GM18501	PLSCR1	NM_021105.2	7	6	82	0.513513513513513	0.377777777777778	0.135735735735736	0.266249641556759	1
GM18501	PLSCR1	NM_021105.2	8	7	240	0.0298507462686567	0.0283018867924528	0.00154885947620389	1	1
GM18501	PLSCR3	NM_001201576.1	2	1	49	0.0769230769230769	0	0.0769230769230769	0.491496598639456	1
GM18501	PLSCR3	NM_020360.3	2	1	30	0.538461538461538	0.0588235294117647	0.479638009049774	0.00935754345049697	0.321112153003546
GM18501	PLXNB2	NM_012401.3	21	20	21	0.8	0.818181818181818	-0.0181818181818182	1	1
GM18501	PLXNB2	NM_012401.3	22	21	21	0.0909090909090909	0	0.0909090909090909	1	1
GM18501	PNISR	NM_001322405.1	11	10	388	0	0.00495049504950495	-0.00495049504950495	1	1
GM18501	PNP	NM_000270.3	1	2	29	0.941176470588235	0.916666666666667	0.0245098039215687	1	1
GM18501	PNP	NM_000270.3	2	3	80	0.979166666666667	0.9375	0.0416666666666666	0.560662122687439	1
GM18501	PNPT1	NM_033109.4	9	8	36	1	0.9375	0.0625	0.444444444444444	1
GM18501	POLD1	NM_001256849.1	5	6	35	0.235294117647059	0.222222222222222	0.0130718954248366	1	1
GM18501	POLD1	NM_001256849.1	20	21	70	0.967741935483871	0.897435897435897	0.0703060380479735	0.373674193882615	1
GM18501	POLD1	NM_001256849.1	21	22	90	0.933333333333333	0.977777777777778	-0.0444444444444444	0.616427741185587	1
GM18501	POLD1	NM_001256849.1	22	23	101	0.02	0.0196078431372549	0.000392156862745099	1	1
GM18501	POLD1	NM_001256849.1	23	24	97	0.520833333333333	0.551020408163265	-0.0301870748299319	0.83973730167269	1
GM18501	POLD1	NM_001256849.1	24	25	76	0.0645161290322581	0	0.0645161290322581	0.163157894736842	1
GM18501	POLD1	NM_001256849.1	25	26	45	0.04	0	0.04	1	1
GM18501	POLD2	NM_001127218.2	7	6	28	0.642857142857143	0.642857142857143	0	1	1
GM18501	POLD2	NM_001127218.2	9	8	40	0.875	0.875	0	1	1
GM18501	POLE	NM_006231.3	46	45	46	0.0454545454545455	0.125	-0.0795454545454545	0.609302325581395	1
GM18501	POLE	NM_006231.3	47	46	27	0.833333333333333	0.733333333333333	0.1	0.661835748792271	1
GM18501	POLG2	NM_007215.3	5	4	23	0.0833333333333333	0.181818181818182	-0.0984848484848485	0.590062111801242	1
GM18501	POLR2E	NM_001316323.1	4	3	22	0.8	0.583333333333333	0.216666666666667	0.380804953560372	1
GM18501	POLR2E	NM_001316323.1	5	4	24	0.1	0.428571428571429	-0.328571428571429	0.171780736426045	1
GM18501	POLRMT	NM_005035.3	17	16	52	0.888888888888889	0.8	0.0888888888888888	0.458251385660647	1
GM18501	POLRMT	NM_005035.3	18	17	72	0.205882352941176	0.105263157894737	0.10061919504644	0.328813611129832	1
GM18501	POLRMT	NM_005035.3	19	18	50	0	0.0357142857142857	-0.0357142857142857	1	1
GM18501	POU2AF1	NM_006235.2	4	3	95	0.926829268292683	1	-0.073170731707317	0.0770147744102879	0.984609016258919
GM18501	PPA2	NM_006903.4	10	9	27	0.666666666666667	0.666666666666667	0	1	1
GM18501	PPAN-P2RY11	NM_001040664.2	8	9	24	0.818181818181818	0.692307692307692	0.125874125874126	0.649395227198431	1
GM18501	PPFIBP2	NM_001256568.1	18	19	24	1	0.916666666666667	0.0833333333333334	1	1
GM18501	PPHLN1	NM_001143787.1	10	11	50	0.0740740740740741	0	0.0740740740740741	0.493061224489796	1
GM18501	PPIF	NM_005729.3	3	4	58	0.111111111111111	0.05	0.0611111111111111	0.580832960143305	1
GM18501	PPIF	NM_005729.3	4	5	30	0.769230769230769	0.705882352941177	0.0633484162895928	1	1
GM18501	PPIL2	NM_001317996.1	16	17	45	0.52	0.55	-0.03	1	1
GM18501	PPIL2	NM_001317996.1	17	18	27	0.125	0.272727272727273	-0.147727272727273	0.370494240059458	1
GM18501	PPIL2	NM_001317996.1	19	20	89	0.96969696969697	1	-0.0303030303030303	0.370786516853933	1
GM18501	PPP1CC	NM_001244974.1	5	4	148	1	0.987654320987654	0.0123456790123457	1	1
GM18501	PPP1CC	NM_001244974.1	6	5	153	0	0.0119047619047619	-0.0119047619047619	1	1
GM18501	PPP1R12C	NM_001271618.1	18	17	23	0	0.153846153846154	-0.153846153846154	0.486166007905138	1
GM18501	PPP1R15A	NM_014330.3	1	2	55	0.777777777777778	0.821428571428571	-0.0436507936507936	0.745814343400949	1
GM18501	PPP1R16A	NM_032902.5	4	5	25	0.923076923076923	0.583333333333333	0.33974358974359	0.0730434782608696	0.959790552484952
GM18501	PPP1R37	NM_019121.1	6	7	52	0.12	0.111111111111111	0.00888888888888889	1	1
GM18501	PPP1R37	NM_019121.1	8	9	21	0.636363636363636	0.4	0.236363636363636	0.394855918075732	1
GM18501	PPP1R37	NM_019121.1	9	10	79	0.888888888888889	0.852941176470588	0.0359477124183006	0.737807739261783	1
GM18501	PPP1R37	NM_019121.1	10	11	97	0.163636363636364	0.119047619047619	0.0445887445887446	0.575850291612417	1
GM18501	PPP1R37	NM_019121.1	11	12	23	0.307692307692308	0.3	0.00769230769230772	1	1
GM18501	PPP2R2D	NM_001291310.1	6	7	31	0.277777777777778	0.0769230769230769	0.200854700854701	0.358864346628529	1
GM18501	PPP2R5C	NM_001161725.1	5	6	27	0	0.0625	-0.0625	1	1
GM18501	PPP6R3	NM_001164161.1	22	23	32	0.285714285714286	0.111111111111111	0.174603174603175	0.364942528735632	1
GM18501	PRC1	NM_003981.3	4	3	45	1	0.935483870967742	0.0645161290322581	1	1
GM18501	PREX1	NM_020820.3	34	33	34	0.9375	1	-0.0625	0.470588235294117	1
GM18501	PREX1	NM_020820.3	35	34	31	0.285714285714286	0.235294117647059	0.0504201680672269	1	1
GM18501	PREX1	NM_020820.3	39	38	43	0.952380952380952	0.863636363636364	0.0887445887445887	0.606920022688599	1
GM18501	PRKAR1A	NM_001276289.1	7	8	34	0.166666666666667	0	0.166666666666667	0.229946524064171	1
GM18501	PRMT7	NM_001184824.1	12	13	34	0.238095238095238	0.461538461538462	-0.223443223443223	0.261874304783092	1
GM18501	PRMT7	NM_001184824.1	13	14	23	0.5	0.727272727272727	-0.227272727272727	0.400323058285099	1
GM18501	PRMT7	NM_001184824.1	14	15	77	0.05	0.027027027027027	0.022972972972973	1	1
GM18501	PRPF31	NM_015629.3	9	10	57	1	0.956521739130435	0.0434782608695652	0.403508771929825	1
GM18501	PRR13	NM_018457.3	1	2	34	0.619047619047619	0.384615384615385	0.234432234432234	0.290554722638681	1
GM18501	PRR14	NM_001320464.1	1	2	43	0.222222222222222	0.08	0.142222222222222	0.217809237960296	1
GM18501	PRR14	NM_001320464.1	6	7	46	0.578947368421053	0.444444444444444	0.134502923976608	0.549897072385979	1
GM18501	PRR14	NM_001320464.1	7	8	54	0.777777777777778	0.851851851851852	-0.0740740740740741	0.727658225072446	1
GM18501	PRR14	NM_001320464.1	8	9	88	0.607843137254902	0.405405405405405	0.202437731849496	0.0838438404917095	1
GM18501	PRR14	NM_001320464.1	9	10	102	0.0166666666666667	0.0476190476190476	-0.030952380952381	0.56703552708212	1
GM18501	PRR14	NM_024031.3	1	2	39	0	0.08	-0.08	0.527665317139001	1
GM18501	PRR22	NM_001134316.1	2	1	32	0.153846153846154	0.473684210526316	-0.319838056680162	0.127945301542777	1
GM18501	PRSS53	NM_001039503.2	5	4	21	1	0.9	0.1	0.476190476190476	1
GM18501	PSAP	NM_001042465.2	14	13	24	0.916666666666667	0.583333333333333	0.333333333333333	0.154952598888526	1
GM18501	PSD4	NM_012455.2	2	3	52	0.96875	0.95	0.01875	1	1
GM18501	PSD4	NM_012455.2	3	4	116	0.578947368421053	1	-0.421052631578947	1.18970584212916e-07	1.89839874096248e-05
GM18501	PSD4	NM_012455.2	5	6	52	0.923076923076923	0.884615384615385	0.0384615384615385	1	1
GM18501	PSD4	NM_012455.2	7	8	34	0.733333333333333	0.947368421052632	-0.214035087719298	0.145786613765741	1
GM18501	PSD4	NM_012455.2	9	10	30	0.230769230769231	0.117647058823529	0.113122171945701	0.627805145046524	1
GM18501	PSD4	NM_012455.2	10	11	29	0.785714285714286	0.666666666666667	0.119047619047619	0.681659170414793	1
GM18501	PSD4	NM_012455.2	11	12	37	0.111111111111111	0.0526315789473684	0.0584795321637427	0.603861003861004	1
GM18501	PSD4	NM_012455.2	12	13	32	0.736842105263158	0.846153846153846	-0.109311740890688	0.670652576937338	1
GM18501	PSD4	NM_012455.2	13	14	64	0.837837837837838	0.888888888888889	-0.051051051051051	0.722228395455197	1
GM18501	PSD4	NM_012455.2	14	15	93	0.0185185185185185	0	0.0185185185185185	1	1
GM18501	PSMA4	NM_001102667.1	2	3	87	0.25	0.255813953488372	-0.0058139534883721	1	1
GM18501	PSMA4	NM_001102667.1	3	4	127	0	0.0153846153846154	-0.0153846153846154	1	1
GM18501	PSMA4	NM_001102667.1	4	5	63	0.0294117647058824	0.0344827586206897	-0.0050709939148073	1	1
GM18501	PSMA4	NM_001102667.1	5	6	28	0.25	0.25	0	1	1
GM18501	PSMA4	NM_001102668.1	1	2	25	0.0714285714285714	0.272727272727273	-0.201298701298701	0.287826086956522	1
GM18501	PSMA7	NM_002792.3	2	1	27	0.461538461538462	0.142857142857143	0.318681318681319	0.103188405797101	1
GM18501	PSMA7	NM_002792.3	4	3	38	0	0.0454545454545455	-0.0454545454545455	1	1
GM18501	PSMA7	NM_002792.3	5	4	39	0.777777777777778	0.857142857142857	-0.0793650793650793	0.682479682479682	1
GM18501	PSMB8	NM_004159.4	3	2	47	0.0714285714285714	0.0606060606060606	0.0108225108225108	1	1
GM18501	PSMB8	NM_148919.3	2	1	30	0.785714285714286	0.75	0.0357142857142857	1	1
GM18501	PSMD13	NM_002817.3	3	4	24	0.363636363636364	0.0769230769230769	0.286713286713287	0.142080745341615	1
GM18501	PSMD13	NM_002817.3	7	8	31	0.666666666666667	0.68421052631579	-0.0175438596491229	1	1
GM18501	PSMG1	NM_001261824.1	6	5	27	1	0.818181818181818	0.181818181818182	0.156695156695157	1
GM18501	PTBP1	NM_002819.4	2	3	25	0.461538461538462	0.5	-0.0384615384615384	1	1
GM18501	PTBP1	NM_002819.4	3	4	33	0.545454545454545	0.590909090909091	-0.0454545454545455	1	1
GM18501	PTBP1	NM_002819.4	4	5	29	0.428571428571429	0.2	0.228571428571429	0.245077461269365	1
GM18501	PTBP1	NM_002819.4	7	8	95	0.955555555555556	1	-0.0444444444444444	0.221724524076148	1
GM18501	PTBP1	NM_002819.4	9	10	50	0.0526315789473684	0.0645161290322581	-0.0118845500848896	1	1
GM18501	PTBP1	NM_002819.4	10	11	168	0	0.0227272727272727	-0.0227272727272727	0.498146564014827	1
GM18501	PTBP1	NM_002819.4	11	12	170	0.0795454545454545	0.0365853658536585	0.042960088691796	0.332064014204923	1
GM18501	PTBP1	NM_002819.4	12	13	48	0.0384615384615385	0	0.0384615384615385	1	1
GM18501	PTBP1	NM_002819.4	13	14	51	0.761904761904762	0.966666666666667	-0.204761904761905	0.0698804406128779	0.941486822842948
GM18501	PTBP1	NM_031990.3	7	8	95	0.955555555555556	1	-0.0444444444444444	0.221724524076148	1
GM18501	PTBP1	NM_031991.3	7	8	91	0.976190476190476	0.979591836734694	-0.00340136054421769	1	1
GM18501	PTBP1	NM_031991.3	8	9	63	0.346153846153846	0.351351351351351	-0.00519750519750523	1	1
GM18501	PTBP2	NM_001300985.1	11	12	80	0.978723404255319	1	-0.0212765957446809	1	1
GM18501	PTCD3	NM_017952.5	12	13	38	0.954545454545455	0.9375	0.0170454545454546	1	1
GM18501	PTCD3	NM_017952.5	14	15	48	0.958333333333333	1	-0.0416666666666666	1	1
GM18501	PTCD3	NM_017952.5	16	17	44	0.304347826086957	0.0476190476190476	0.256728778467909	0.0480528960392829	0.806599926876352
GM18501	PTCD3	NM_017952.5	17	18	32	0.222222222222222	0.214285714285714	0.00793650793650794	1	1
GM18501	PTCD3	NM_017952.5	18	19	48	0	0.0588235294117647	-0.0588235294117647	0.354166666666667	1
GM18501	PTK2B	NM_004103.4	21	22	73	0.227272727272727	0.0784313725490196	0.148841354723708	0.11754229869548	1
GM18501	PTK2B	NM_004103.4	25	26	331	0.0102040816326531	0.00740740740740741	0.00279667422524565	1	1
GM18501	PTK2B	NM_004103.4	26	27	48	0.37037037037037	0.857142857142857	-0.486772486772487	0.00101626218833354	0.0603399765821946
GM18501	PTK2B	NM_004103.4	29	30	68	0.0967741935483871	0.108108108108108	-0.011333914559721	1	1
GM18501	PTK2B	NM_004103.4	30	31	96	0.0263157894736842	0	0.0263157894736842	0.395833333333333	1
GM18501	PTK2B	NM_173175.2	23	24	342	0.0203045685279188	0.0758620689655172	-0.0555575004375985	0.0162307730872364	0.454372661941044
GM18501	PTMA	NM_001099285.1	1	2	155	0.688311688311688	0.884615384615385	-0.196303696303696	0.00323437761404871	0.145895573965155
GM18501	PTMA	NM_001099285.1	2	3	72	0.1	0	0.1	0.068075117370892	0.935165014694087
GM18501	PTMA	NM_001099285.1	3	4	56	0	0.3	-0.3	0.00230092036814726	0.111259086968121
GM18501	PTMA	NM_002823.4	1	2	155	0.688311688311688	0.884615384615385	-0.196303696303696	0.00323437761404871	0.145895573965155
GM18501	PTMA	NM_002823.4	2	3	72	0.1	0	0.1	0.068075117370892	0.935165014694087
GM18501	PTOV1	NM_001305105.1	5	6	39	0.05	0.0526315789473684	-0.00263157894736842	1	1
GM18501	PTPN1	NM_001278618.1	4	5	27	0.833333333333333	0.933333333333333	-0.1	0.569230769230769	1
GM18501	PTPN1	NM_001278618.1	5	6	40	0	0.0434782608695652	-0.0434782608695652	1	1
[truncated: 23,533 more rows]

## Sheet: Table S4
Supplemental Table 4. SNPs associated with allele-specific splicing orders. Results from DRIMSeq tuQTL showing SNPs associated with intermediate isoform usage for each splicing level and intron group. The number of heterozygous cell lines is shown of each SNP.
gene	analyzed_introns	splicing_level	block_id	snp_id	lr	df	pvalue	adj_pvalue	gene_name	het_cell_lines
NM_001029835.2	6_7_8	1	block_39	rs2304689	17.9359136162714	4	4.43242764061877e-05	0.00355069114210996	CCM2	4
NM_001029835.2	6_7_8	1	block_39	rs6971403	17.9359136162714	4	4.43242764061877e-05	0.00355069114210996	CCM2	4
NM_001029835.2	6_7_8	1	block_39	rs4724354	17.9359136162714	4	4.43242764061877e-05	0.00355069114210996	CCM2	4
NM_001029835.2	6_7_8	1	block_39	rs17172330	17.9359136162714	4	4.43242764061877e-05	0.00355069114210996	CCM2	4
NM_001029835.2	6_7_8	1	block_39	rs7788412	17.9359136162714	4	4.43242764061877e-05	0.00355069114210996	CCM2	4
NM_001029835.2	6_7_8	1	block_39	rs58194439	17.9359136162714	4	4.43242764061877e-05	0.00355069114210996	CCM2	4
NM_001029835.2	6_7_8	1	block_39	rs56028225	17.9359136162714	4	4.43242764061877e-05	0.00355069114210996	CCM2	4
NM_001029835.2	6_7_8	1	block_39	rs2289367	17.9359136162714	4	4.43242764061877e-05	0.00355069114210996	CCM2	4
NM_001029835.2	6_7_8	1	block_39	rs2289369	17.9359136162714	4	4.43242764061877e-05	0.00355069114210996	CCM2	4
NM_001029835.2	6_7_8	1	block_39	rs2289371	17.9359136162714	4	4.43242764061877e-05	0.00355069114210996	CCM2	4
NM_001029835.2	6_7_8	1	block_39	rs10951794	17.9359136162714	4	4.43242764061877e-05	0.00355069114210996	CCM2	4
NM_001402.5	5_4_3	2	block_13	rs9442917	19.8139228137723	4	4.43242764061877e-05	0.00355069114210996	EEF1A1	3
NM_001402.5	5_4_3	2	block_13	rs201583180	19.8139228137723	4	4.43242764061877e-05	0.00355069114210996	EEF1A1	3
NM_002117.5	6_5_4	2	block_30	rs2523609	19.9526545268009	4	4.43242764061877e-05	0.00355069114210996	HLA-C	9
NM_002123.4	4_3_2	1	block_40	rs1130446	19.26282458278	4	4.43242764061877e-05	0.00355069114210996	HLA-DQB1	5
NM_002123.4	4_3_2	1	block_41	rs34153824	25.4571632018001	4	4.43242764061877e-05	0.00355069114210996	HLA-DQB1	5
NM_002123.4	4_3_2	1	block_41	rs1049222	25.4571632018001	4	4.43242764061877e-05	0.00355069114210996	HLA-DQB1	5
NM_002123.4	4_3_2	1	block_41	rs1049219	25.4571632018001	4	4.43242764061877e-05	0.00355069114210996	HLA-DQB1	5
NM_002123.4	4_3_2	1	block_41	rs1071639	25.4571632018001	4	4.43242764061877e-05	0.00355069114210996	HLA-DQB1	5
NM_002123.4	4_3_2	1	block_41	rs28396311	25.4571632018001	4	4.43242764061877e-05	0.00355069114210996	HLA-DQB1	5
NM_002123.4	4_3_2	1	block_41	rs1130432	25.4571632018001	4	4.43242764061877e-05	0.00355069114210996	HLA-DQB1	5
NM_002123.4	4_3_2	1	block_41	rs9273723	25.4571632018001	4	4.43242764061877e-05	0.00355069114210996	HLA-DQB1	5
NM_002123.4	4_3_2	1	block_41	rs71542428	25.4571632018001	4	4.43242764061877e-05	0.00355069114210996	HLA-DQB1	5
NM_002123.4	4_3_2	1	block_41	rs9273794	25.4571632018001	4	4.43242764061877e-05	0.00355069114210996	HLA-DQB1	5
NM_002123.4	4_3_2	1	block_41	rs66967821	25.4571632018001	4	4.43242764061877e-05	0.00355069114210996	HLA-DQB1	5
NM_002123.4	4_3_2	1	block_41	rs36233043	25.4571632018001	4	4.43242764061877e-05	0.00355069114210996	HLA-DQB1	5
NM_002123.4	4_3_2	1	block_41	rs9273912	25.4571632018001	4	4.43242764061877e-05	0.00355069114210996	HLA-DQB1	5
NM_002123.4	4_3_2	1	block_41	rs1049088	25.4571632018001	4	4.43242764061877e-05	0.00355069114210996	HLA-DQB1	5
NM_002123.4	4_3_2	1	block_41	rs1049107	25.4571632018001	4	4.43242764061877e-05	0.00355069114210996	HLA-DQB1	5
NM_002123.4	4_3_2	1	block_41	rs1049100	25.4571632018001	4	4.43242764061877e-05	0.00355069114210996	HLA-DQB1	5
NM_002123.4	4_3_2	1	block_41	rs71542437	25.4571632018001	4	4.43242764061877e-05	0.00355069114210996	HLA-DQB1	5
NM_002123.4	4_3_2	1	block_41	rs9274131	25.4571632018001	4	4.43242764061877e-05	0.00355069114210996	HLA-DQB1	5
NM_002123.4	4_3_2	1	block_41	rs281874809	25.4571632018001	4	4.43242764061877e-05	0.00355069114210996	HLA-DQB1	5
NM_002123.4	4_3_2	1	block_41	rs281874806	25.4571632018001	4	4.43242764061877e-05	0.00355069114210996	HLA-DQB1	5
NM_002123.4	4_3_2	1	block_41	rs281863317	25.4571632018001	4	4.43242764061877e-05	0.00355069114210996	HLA-DQB1	5
NM_002123.4	4_3_2	1	block_41	rs1130390	25.4571632018001	4	4.43242764061877e-05	0.00355069114210996	HLA-DQB1	5
NM_002123.4	4_3_2	1	block_41	rs67303455	25.4571632018001	4	4.43242764061877e-05	0.00355069114210996	HLA-DQB1	5
NM_002123.4	4_3_2	1	block_41	rs116485144	25.4571632018001	4	4.43242764061877e-05	0.00355069114210996	HLA-DQB1	5
NM_002123.4	4_3_2	1	block_41	rs77596642	25.4571632018001	4	4.43242764061877e-05	0.00355069114210996	HLA-DQB1	5
NM_002123.4	4_3_2	1	block_41	rs77020460	25.4571632018001	4	4.43242764061877e-05	0.00355069114210996	HLA-DQB1	5
NM_002123.4	4_3_2	1	block_41	rs112017333	25.4571632018001	4	4.43242764061877e-05	0.00355069114210996	HLA-DQB1	5
NM_002123.4	4_3_2	1	block_41	rs34230758	25.4571632018001	4	4.43242764061877e-05	0.00355069114210996	HLA-DQB1	5
NM_002123.4	4_3_2	1	block_41	rs66481651	25.4571632018001	4	4.43242764061877e-05	0.00355069114210996	HLA-DQB1	5
NM_002123.4	4_3_2	1	block_41	rs114003122	25.4571632018001	4	4.43242764061877e-05	0.00355069114210996	HLA-DQB1	5
NM_002123.4	4_3_2	1	block_41	rs116617461	25.4571632018001	4	4.43242764061877e-05	0.00355069114210996	HLA-DQB1	5
NM_002123.4	4_3_2	1	block_41	rs35567463	25.4571632018001	4	4.43242764061877e-05	0.00355069114210996	HLA-DQB1	5
NM_002123.4	4_3_2	1	block_41	rs72844397	25.4571632018001	4	4.43242764061877e-05	0.00355069114210996	HLA-DQB1	5
NM_002123.4	4_3_2	1	block_41	rs1049061	25.4571632018001	4	4.43242764061877e-05	0.00355069114210996	HLA-DQB1	5
NM_002123.4	4_3_2	1	block_41	rs1049059	25.4571632018001	4	4.43242764061877e-05	0.00355069114210996	HLA-DQB1	5
NM_002123.4	4_3_2	1	block_41	rs67147537	25.4571632018001	4	4.43242764061877e-05	0.00355069114210996	HLA-DQB1	5
NM_002123.4	4_3_2	1	block_43	rs6689	20.1180337295302	4	4.43242764061877e-05	0.00355069114210996	HLA-DQB1	5
NM_002123.4	4_3_2	1	block_48	rs1071641	20.6892327273149	4	4.43242764061877e-05	0.00355069114210996	HLA-DQB1	5
NM_002123.4	4_3_2	1	block_48	rs68081734	20.6892327273149	4	4.43242764061877e-05	0.00355069114210996	HLA-DQB1	5
NM_002123.4	4_3_2	1	block_48	rs1130431	20.6892327273149	4	4.43242764061877e-05	0.00355069114210996	HLA-DQB1	5
NM_002123.4	4_3_2	1	block_48	rs72844321	20.6892327273149	4	4.43242764061877e-05	0.00355069114210996	HLA-DQB1	5
NM_002123.4	4_3_2	1	block_48	rs281875044	20.6892327273149	4	4.43242764061877e-05	0.00355069114210996	HLA-DQB1	5
NM_002123.4	4_3_2	1	block_48	rs281874984	20.6892327273149	4	4.43242764061877e-05	0.00355069114210996	HLA-DQB1	5
NM_002123.4	4_3_2	1	block_48	rs281874983	20.6892327273149	4	4.43242764061877e-05	0.00355069114210996	HLA-DQB1	5
NM_002123.4	4_3_2	1	block_48	rs281874982	20.6892327273149	4	4.43242764061877e-05	0.00355069114210996	HLA-DQB1	5
NM_002123.4	4_3_2	1	block_48	rs281874967	20.6892327273149	4	4.43242764061877e-05	0.00355069114210996	HLA-DQB1	5
NM_002123.4	4_3_2	1	block_48	rs281874965	20.6892327273149	4	4.43242764061877e-05	0.00355069114210996	HLA-DQB1	5
NM_002123.4	4_3_2	1	block_48	rs281874963	20.6892327273149	4	4.43242764061877e-05	0.00355069114210996	HLA-DQB1	5
NM_002123.4	4_3_2	1	block_48	rs281874911	20.6892327273149	4	4.43242764061877e-05	0.00355069114210996	HLA-DQB1	5
NM_002123.4	4_3_2	1	block_48	rs281863221	20.6892327273149	4	4.43242764061877e-05	0.00355069114210996	HLA-DQB1	5
NM_002123.4	4_3_2	1	block_48	rs281863194	20.6892327273149	4	4.43242764061877e-05	0.00355069114210996	HLA-DQB1	5
NM_002123.4	4_3_2	1	block_48	rs1049056	20.6892327273149	4	4.43242764061877e-05	0.00355069114210996	HLA-DQB1	5
NM_002123.4	4_3_2	1	block_48	rs71542467	20.6892327273149	4	4.43242764061877e-05	0.00355069114210996	HLA-DQB1	5
NM_002123.4	4_3_2	1	block_48	rs71542468	20.6892327273149	4	4.43242764061877e-05	0.00355069114210996	HLA-DQB1	5
NM_002123.4	4_3_2	1	block_54	rs1049178	20.6892327273149	4	4.43242764061877e-05	0.00355069114210996	HLA-DQB1	5
NM_002123.4	4_3_2	1	block_54	rs1049177	20.6892327273149	4	4.43242764061877e-05	0.00355069114210996	HLA-DQB1	5
NM_002123.4	4_3_2	1	block_54	rs1049175	20.6892327273149	4	4.43242764061877e-05	0.00355069114210996	HLA-DQB1	5
NM_002123.4	4_3_2	1	block_54	rs71542429	20.6892327273149	4	4.43242764061877e-05	0.00355069114210996	HLA-DQB1	5
NM_002123.4	4_3_2	1	block_54	rs71542430	20.6892327273149	4	4.43242764061877e-05	0.00355069114210996	HLA-DQB1	5
NM_002123.4	4_3_2	1	block_54	rs72844386	20.6892327273149	4	4.43242764061877e-05	0.00355069114210996	HLA-DQB1	5
NM_002123.4	4_3_2	1	block_54	rs115227911	20.6892327273149	4	4.43242764061877e-05	0.00355069114210996	HLA-DQB1	5
NM_002123.4	4_3_2	1	block_54	rs66727344	20.6892327273149	4	4.43242764061877e-05	0.00355069114210996	HLA-DQB1	5
NM_002123.4	4_3_2	1	block_54	rs67842782	20.6892327273149	4	4.43242764061877e-05	0.00355069114210996	HLA-DQB1	5
NM_002123.4	4_3_2	1	block_54	rs71542463	20.6892327273149	4	4.43242764061877e-05	0.00355069114210996	HLA-DQB1	5
NM_002123.4	4_3_2	1	block_54	rs71542464	20.6892327273149	4	4.43242764061877e-05	0.00355069114210996	HLA-DQB1	5
NM_002123.4	4_3_2	1	block_54	rs74199853	20.6892327273149	4	4.43242764061877e-05	0.00355069114210996	HLA-DQB1	5
NM_002123.4	4_3_2	1	block_81	rs68027833	25.4571632018001	4	4.43242764061877e-05	0.00355069114210996	HLA-DQB1	5
NM_002123.4	4_3_2	1	block_81	rs281874846	25.4571632018001	4	4.43242764061877e-05	0.00355069114210996	HLA-DQB1	5
NM_002123.4	4_3_2	1	block_81	rs1130368	25.4571632018001	4	4.43242764061877e-05	0.00355069114210996	HLA-DQB1	5
NM_002123.4	4_3_2	1	block_81	rs74186130	25.4571632018001	4	4.43242764061877e-05	0.00355069114210996	HLA-DQB1	5
NM_002123.4	4_3_2	1	block_81	rs281862007	25.4571632018001	4	4.43242764061877e-05	0.00355069114210996	HLA-DQB1	5
NM_002123.4	4_3_2	1	block_81	rs74188963	25.4571632018001	4	4.43242764061877e-05	0.00355069114210996	HLA-DQB1	5
NM_002123.4	4_3_2	1	block_81	rs74203503	25.4571632018001	4	4.43242764061877e-05	0.00355069114210996	HLA-DQB1	5
NM_002123.4	4_3_2	1	block_81	rs72844390	25.4571632018001	4	4.43242764061877e-05	0.00355069114210996	HLA-DQB1	5
NM_002123.4	4_3_2	1	block_94	rs281863750	21.6147543143193	4	4.43242764061877e-05	0.00355069114210996	HLA-DQB1	5
NM_002123.4	4_3_2	1	block_94	rs114868939	21.6147543143193	4	4.43242764061877e-05	0.00355069114210996	HLA-DQB1	5
NM_002123.4	4_3_2	1	block_96	rs281863724	21.6147543143193	4	4.43242764061877e-05	0.00355069114210996	HLA-DQB1	5
NM_002123.4	4_3_2	1	block_110	rs281874990	20.6892327273149	4	4.43242764061877e-05	0.00355069114210996	HLA-DQB1	5
NM_002123.4	4_3_2	1	block_110	rs9274503	20.6892327273149	4	4.43242764061877e-05	0.00355069114210996	HLA-DQB1	5
NM_002123.4	4_3_2	1	block_115	rs281863157	18.1519120525854	4	4.43242764061877e-05	0.00355069114210996	HLA-DQB1	5
NM_002123.4	4_3_2	1	block_115	rs281863130	18.1519120525854	4	4.43242764061877e-05	0.00355069114210996	HLA-DQB1	5
NM_002123.4	4_3_2	1	block_115	rs9274370	18.1519120525854	4	4.43242764061877e-05	0.00355069114210996	HLA-DQB1	5
NM_002123.4	4_3_2	1	block_115	rs71542465	18.1519120525854	4	4.43242764061877e-05	0.00355069114210996	HLA-DQB1	5
NM_002123.4	4_3_2	1	block_120	rs9274297	20.6892327273149	4	4.43242764061877e-05	0.00355069114210996	HLA-DQB1	5
NM_002123.4	4_3_2	1	block_120	rs1063318	20.6892327273149	4	4.43242764061877e-05	0.00355069114210996	HLA-DQB1	5
[truncated: 552 more rows]

## Sheet: Table S5
Supplemental Table 5. Allele-specific poly(A) tail lengths. For each cell line and compartment, genes showing a statistically significant difference (FDR < 0.05) in Wilcoxon rank-sum test comparing poly(A) tail lengths between alleles. The number of reads and mean poly(A) tail length is shown for each allele, as well as the difference in poly(A) tail length between alleles and ratio of allele 1 r…
[truncated: 230 more rows]

[truncated: 1 more sheets: Table S6]
